# Supplementary material for: Levels of Urinary Trypsin Inhibitor and Structure of Its Chondroitin Sulphate Moiety in Type 1 and Type 2 Diabetes
Source: J Diabetes Res. 2018 Feb 6;2018:9378515. doi: 10.1155/2018/9378515 (PMC5818928; doi:10.1155/2018/9378515)
Supplement: Supplementary Materials — Supplementary Material 1: complete MS data about UTI identification by nano-LC-MS/MS analysis. [file 9378515.f1.xlsx]

## Sheet: Controls
N	Total	%Cov(95)	Accessions	Entry	Names	Contrib	Conf	Sequence	Modifications	Cleavages	dMass	Prec MW	Prec m/z	Theor MW	Theor m/z	Theor z	Sc
1	110.11	38.64	P02760	AMBP_HUMAN	Protein AMBP OS=Homo sapiens GN=AMBP PE=1 SV=1	2	99	AACNLPIVR	Carbamidomethyl(C)@3	cleaved V-A@N-term	0.000176373	1012.55	507.282	1012.55	507.282	2	11
1	110.11	38.64	P02760	AMBP_HUMAN	Protein AMBP OS=Homo sapiens GN=AMBP PE=1 SV=1	2	99	ACNLPIVR	Carbamidomethyl(C)@2	cleaved A-A@N-term	-0.00029636	941.511	471.763	941.512	471.763	2	9
1	110.11	38.64	P02760	AMBP_HUMAN	Protein AMBP OS=Homo sapiens GN=AMBP PE=1 SV=1	2	99	AFIQLW	Oxidation(W)@6	cleaved W-A@C-term	0.000259128	792.417	397.216	792.417	397.216	2	7
1	110.11	38.64	P02760	AMBP_HUMAN	Protein AMBP OS=Homo sapiens GN=AMBP PE=1 SV=1	2	99	AFIQLWAFDAVK	Oxidation(W)@6		-0.00115619	1423.75	712.882	1423.75	712.882	2	12
1	110.11	38.64	P02760	AMBP_HUMAN	Protein AMBP OS=Homo sapiens GN=AMBP PE=1 SV=1	2	99	AVLPQEEEGSGGGQLVTEVTK			0.00298357	2127.07	710.031	2127.07	710.03	3	27
1	110.11	38.64	P02760	AMBP_HUMAN	Protein AMBP OS=Homo sapiens GN=AMBP PE=1 SV=1	2	99	AVLPQEEEGSGGGQLVTEVTKK	Dehydrated(S)@10	missed K-K@21	-0.00214721	2237.15	746.725	2237.15	746.725	3	19
1	110.11	38.64	P02760	AMBP_HUMAN	Protein AMBP OS=Homo sapiens GN=AMBP PE=1 SV=1	2	99	CNLPIVR	Carbamidomethyl(C)@1	cleaved A-C@N-term	0.00193731	870.477	436.245	870.475	436.245	2	7
1	110.11	38.64	P02760	AMBP_HUMAN	Protein AMBP OS=Homo sapiens GN=AMBP PE=1 SV=1	2	99	CVLFPY	Carbamidomethyl(C)@1	cleaved Y-G@C-term	0.00125841	797.379	399.697	797.378	399.696	2	7
1	110.11	38.64	P02760	AMBP_HUMAN	Protein AMBP OS=Homo sapiens GN=AMBP PE=1 SV=1	2	99	CVLFPYGG	Carbamidomethyl(C)@1	cleaved G-C@C-term	0.000185904	911.421	456.718	911.421	456.718	2	11
1	110.11	38.64	P02760	AMBP_HUMAN	Protein AMBP OS=Homo sapiens GN=AMBP PE=1 SV=1	2	99	CVLFPYGGC	Carbamidomethyl(C)@1; Carbamidomethyl(C)@9	cleaved C-Q@C-term	-0.000735304	1071.45	536.733	1071.45	536.733	2	14
1	110.11	38.64	P02760	AMBP_HUMAN	Protein AMBP OS=Homo sapiens GN=AMBP PE=1 SV=1	2	99	CVLFPYGGCQGN	Carbamidomethyl(C)@1; Carbamidomethyl(C)@9	cleaved N-G@C-term	0.00245622	1370.58	686.296	1370.57	686.295	2	17
1	110.11	38.64	P02760	AMBP_HUMAN	Protein AMBP OS=Homo sapiens GN=AMBP PE=1 SV=1	2	99	CVLFPYGGCQGNGNK	Carbamidomethyl(C)@1; Carbamidomethyl(C)@9		0.00251182	1669.74	557.586	1669.73	557.585	3	17
1	110.11	38.64	P02760	AMBP_HUMAN	Protein AMBP OS=Homo sapiens GN=AMBP PE=1 SV=1	2	99	CVLFPYGGCQGNGNKFYSEK	Carbamidomethyl(C)@1; Carbamidomethyl(C)@9	missed K-F@15	0.0113128	2324.05	775.689	2324.04	775.686	3	19
1	110.11	38.64	P02760	AMBP_HUMAN	Protein AMBP OS=Homo sapiens GN=AMBP PE=1 SV=1	2	99	ECLQTCRTVAACNLPIVR	Carbamidomethyl(C)@2; Didehydro(T)@5; Carbamidomethyl(C)@6; Carbamidomethyl(C)@12	missed R-T@7	-0.00291152	2158.04	720.355	2158.04	720.355	3	19
1	110.11	38.64	P02760	AMBP_HUMAN	Protein AMBP OS=Homo sapiens GN=AMBP PE=1 SV=1	2	99	EDSCQLGY	Glu->pyro-Glu@N-term; Carbamidomethyl(C)@4	cleaved Y-S@C-term	-0.00159056	952.358	477.186	952.36	477.187	2	9
1	110.11	38.64	P02760	AMBP_HUMAN	Protein AMBP OS=Homo sapiens GN=AMBP PE=1 SV=1	2	99	EDSCQLGYSAGP	Carbamidomethyl(C)@4; Amidated@C-term	cleaved P-C@C-term	-0.00195504	1281.53	641.771	1281.53	641.772	2	13
1	110.11	38.64	P02760	AMBP_HUMAN	Protein AMBP OS=Homo sapiens GN=AMBP PE=1 SV=1	2	99	EDSCQLGYSAGPC	Carbamidomethyl(C)@4; Carbamidomethyl(C)@13	cleaved C-M@C-term	-0.00586452	1442.54	722.277	1442.54	722.279	2	17
1	110.11	38.64	P02760	AMBP_HUMAN	Protein AMBP OS=Homo sapiens GN=AMBP PE=1 SV=1	2	99	EDSCQLGYSAGPCMGMTSR	Propionamide@N-term; No Carbamidomethyl(C)@4; Carbamidomethyl(C)@13; Oxidation(M)@14; Oxidation(M)@16		0.00438287	2151.84	718.286	2151.83	718.285	3	18
1	110.11	38.64	P02760	AMBP_HUMAN	Protein AMBP OS=Homo sapiens GN=AMBP PE=1 SV=1	2	99	EYCGVPGDGDE	Carbamidomethyl(C)@3	cleaved E-E@C-term	-0.00105435	1196.43	599.221	1196.43	599.222	2	11
1	110.11	38.64	P02760	AMBP_HUMAN	Protein AMBP OS=Homo sapiens GN=AMBP PE=1 SV=1	2	99	EYCGVPGDGDEE	Carbamidomethyl(C)@3	cleaved E-L@C-term	-0.00175664	1325.47	663.742	1325.47	663.743	2	12
1	110.11	38.64	P02760	AMBP_HUMAN	Protein AMBP OS=Homo sapiens GN=AMBP PE=1 SV=1	2	99	EYCGVPGDGDEEL	Carbamidomethyl(C)@3	cleaved L-L@C-term	-0.00338147	1438.55	720.284	1438.56	720.285	2	10
1	110.11	38.64	P02760	AMBP_HUMAN	Protein AMBP OS=Homo sapiens GN=AMBP PE=1 SV=1	2	99	EYCGVPGDGDEELL	Carbamidomethyl(C)@3	cleaved L-R@C-term	0.000799062	1551.64	776.828	1551.64	776.827	2	10
1	110.11	38.64	P02760	AMBP_HUMAN	Protein AMBP OS=Homo sapiens GN=AMBP PE=1 SV=1	2	99	EYCGVPGDGDEELLR	Carbamidomethyl(C)@3		0.00194554	1707.74	854.879	1707.74	854.878	2	15
1	110.11	38.64	P02760	AMBP_HUMAN	Protein AMBP OS=Homo sapiens GN=AMBP PE=1 SV=1	2	99	EYCGVPGDGDEELLRF	Carbamidomethyl(C)@3	cleaved F-S@C-term; missed R-F@15	-0.000264111	1854.81	928.412	1854.81	928.412	2	18
1	110.11	38.64	P02760	AMBP_HUMAN	Protein AMBP OS=Homo sapiens GN=AMBP PE=1 SV=1	2	99	FPYGGCQGNGNKFYSEKECREYCGVPGDGDEELLR	Carbamidomethyl(C)@6; Carbamidomethyl(C)@19; Carbamidomethyl(C)@23	cleaved L-F@N-term; missed K-F@12; missed K-E@17; missed R-E@20	-13.0233	4073.73	679.963	4086.76	682.133	6	10
1	110.11	38.64	P02760	AMBP_HUMAN	Protein AMBP OS=Homo sapiens GN=AMBP PE=1 SV=1	2	99	FYSEKECR	Formyl(K)@5; Carbamidomethyl(C)@7	missed K-E@5	-0.00185134	1145.48	573.747	1145.48	573.748	2	9
1	110.11	38.64	P02760	AMBP_HUMAN	Protein AMBP OS=Homo sapiens GN=AMBP PE=1 SV=1	2	99	GDEELLR		cleaved D-G@N-term	0.00015488	830.414	416.214	830.413	416.214	2	8
1	110.11	38.64	P02760	AMBP_HUMAN	Protein AMBP OS=Homo sapiens GN=AMBP PE=1 SV=1	2	99	GGCMGNGNNFVTEK	Carbamidomethyl(C)@3; Deamidated(N)@6	cleaved Y-G@N-term	-0.00457902	1484.6	743.306	1484.6	743.308	2	13
1	110.11	38.64	P02760	AMBP_HUMAN	Protein AMBP OS=Homo sapiens GN=AMBP PE=1 SV=1	2	99	GGGQLVTEVTK		cleaved S-G@N-term	-0.00673429	1087.58	544.798	1087.59	544.801	2	15
1	110.11	38.64	P02760	AMBP_HUMAN	Protein AMBP OS=Homo sapiens GN=AMBP PE=1 SV=1	2	99	GGQLVTEVTK		cleaved G-G@N-term	-0.00778492	1030.56	516.286	1030.57	516.29	2	13
1	110.11	38.64	P02760	AMBP_HUMAN	Protein AMBP OS=Homo sapiens GN=AMBP PE=1 SV=1	2	99	GKCVLFPYGGCQGNGNK	Carbamidomethyl(C)@3; Carbamidomethyl(C)@11	missed K-C@2	-0.00274397	1854.85	619.29	1854.85	619.291	3	20
1	110.11	38.64	P02760	AMBP_HUMAN	Protein AMBP OS=Homo sapiens GN=AMBP PE=1 SV=1	2	99	GNNFVTEKECLQTCR	Carbamidomethyl(C)@10; Carbamidomethyl(C)@14	cleaved N-G@N-term; missed K-E@8	-0.00195296	1854.83	619.285	1854.84	619.286	3	18
1	110.11	38.64	P02760	AMBP_HUMAN	Protein AMBP OS=Homo sapiens GN=AMBP PE=1 SV=1	2	99	GQLVTEVTK		cleaved G-G@N-term	-0.0040364	973.54	487.777	973.544	487.779	2	10
1	110.11	38.64	P02760	AMBP_HUMAN	Protein AMBP OS=Homo sapiens GN=AMBP PE=1 SV=1	2	99	GVPGDGDEELLR		cleaved C-G@N-term	0.00431623	1255.61	628.812	1255.6	628.81	2	10
1	110.11	38.64	P02760	AMBP_HUMAN	Protein AMBP OS=Homo sapiens GN=AMBP PE=1 SV=1	2	99	IQLWAFDAVK		cleaved F-I@N-term	-0.00196968	1189.65	595.831	1189.65	595.832	2	13
1	110.11	38.64	P02760	AMBP_HUMAN	Protein AMBP OS=Homo sapiens GN=AMBP PE=1 SV=1	2	99	KCVLFPYGGCQGNGNK	Carbamidomethyl(C)@2; Carbamidomethyl(C)@10; Deamidated(N)@13	cleaved G-K@N-term; missed K-C@1	0.0181517	1798.83	600.618	1798.81	600.612	3	11
1	110.11	38.64	P02760	AMBP_HUMAN	Protein AMBP OS=Homo sapiens GN=AMBP PE=1 SV=1	2	99	KEDSCQLGY	Carbamidomethyl(C)@5	cleaved Y-S@C-term; missed K-E@1	-0.00567388	1098.46	550.237	1098.47	550.24	2	11
1	110.11	38.64	P02760	AMBP_HUMAN	Protein AMBP OS=Homo sapiens GN=AMBP PE=1 SV=1	2	99	KEDSCQLGYSAGPC	Carbamidomethyl(C)@5; Carbamidomethyl(C)@14	cleaved C-M@C-term; missed K-E@1	-0.00474437	1570.63	786.324	1570.64	786.327	2	19
1	110.11	38.64	P02760	AMBP_HUMAN	Protein AMBP OS=Homo sapiens GN=AMBP PE=1 SV=1	2	99	KEDSCQLGYSAGPCMGMTSR	Carbamidomethyl(C)@5; Carbamidomethyl(C)@14	missed K-E@1	-0.00232054	2233.92	745.647	2233.92	745.648	3	23
1	110.11	38.64	P02760	AMBP_HUMAN	Protein AMBP OS=Homo sapiens GN=AMBP PE=1 SV=1	2	99	LVTEVTK		cleaved Q-L@N-term	-0.00146595	788.463	395.239	788.464	395.239	2	6
1	110.11	38.64	P02760	AMBP_HUMAN	Protein AMBP OS=Homo sapiens GN=AMBP PE=1 SV=1	2	99	MGNGNNFVTEK		cleaved C-M@N-term	-0.00492234	1209.54	605.777	1209.54	605.78	2	13
1	110.11	38.64	P02760	AMBP_HUMAN	Protein AMBP OS=Homo sapiens GN=AMBP PE=1 SV=1	2	99	NFVTEKECLQTCR	Carbamidomethyl(C)@8; Carbamidomethyl(C)@12	cleaved N-N@N-term; missed K-E@6	0.00197918	1683.77	562.265	1683.77	562.264	3	14
1	110.11	38.64	P02760	AMBP_HUMAN	Protein AMBP OS=Homo sapiens GN=AMBP PE=1 SV=1	2	99	NLPIVR		cleaved C-N@N-term	0.000563266	710.444	356.229	710.444	356.229	2	7
1	110.11	38.64	P02760	AMBP_HUMAN	Protein AMBP OS=Homo sapiens GN=AMBP PE=1 SV=1	2	99	PGDGDEELLR		cleaved V-P@N-term	0.000584311	1099.52	550.765	1099.51	550.765	2	15
1	110.11	38.64	P02760	AMBP_HUMAN	Protein AMBP OS=Homo sapiens GN=AMBP PE=1 SV=1	2	99	QLWAFDAVK		cleaved I-Q@N-term	-0.000124655	1076.57	539.29	1076.57	539.29	2	10
1	110.11	38.64	P02760	AMBP_HUMAN	Protein AMBP OS=Homo sapiens GN=AMBP PE=1 SV=1	2	99	RRAVLPQEEEGSGGGQLVTEVTK		cleaved V-R@N-term; missed R-R@1; missed R-A@2	-8.99442	2430.28	1216.15	2439.27	1220.64	2	17
1	110.11	38.64	P02760	AMBP_HUMAN	Protein AMBP OS=Homo sapiens GN=AMBP PE=1 SV=1	2	99	SAGPCMGMTSR	Carbamidomethyl(C)@5	cleaved Y-S@N-term	0.00421543	1153.47	577.743	1153.47	577.741	2	10
1	110.11	38.64	P02760	AMBP_HUMAN	Protein AMBP OS=Homo sapiens GN=AMBP PE=1 SV=1	2	99	TVAACNLPIVR	No Carbamidomethyl(C)@5		0.00256337	1155.65	578.83	1155.64	578.829	2	9
1	110.11	38.64	P02760	AMBP_HUMAN	Protein AMBP OS=Homo sapiens GN=AMBP PE=1 SV=1	2	99	VAACNLPIVR	Carbamidomethyl(C)@4	cleaved T-V@N-term	-0.00307369	1111.61	556.814	1111.62	556.816	2	11
1	110.11	38.64	P02760	AMBP_HUMAN	Protein AMBP OS=Homo sapiens GN=AMBP PE=1 SV=1	2	99	WAFDAVK		cleaved L-W@N-term	0.00183118	835.425	418.72	835.423	418.719	2	10
1	110.11	38.64	P02760	AMBP_HUMAN	Protein AMBP OS=Homo sapiens GN=AMBP PE=1 SV=1	2	99	YCGVPGDGDEELLR	Carbamidomethyl(C)@2	cleaved E-Y@N-term	-0.00488613	1578.69	790.354	1578.7	790.357	2	13
1	110.11	38.64	P02760	AMBP_HUMAN	Protein AMBP OS=Homo sapiens GN=AMBP PE=1 SV=1	2	99	YSEKECREYCGVPGDGDEELLR	Carbamidomethyl(C)@6; Amino(Y)@9; Carbamidomethyl(C)@10; Oxidation(P)@13	cleaved F-Y@N-term; missed K-E@4; missed R-E@7	0.0122098	2691.17	673.799	2691.15	673.796	4	15
1	110.11	38.64	P02760	AMBP_HUMAN	Protein AMBP OS=Homo sapiens GN=AMBP PE=1 SV=1	1.76955	99	AVLPQEEEG		cleaved G-S@C-term	-0.000701601	970.46	486.237	970.461	486.238	2	9
1	110.11	38.64	P02760	AMBP_HUMAN	Protein AMBP OS=Homo sapiens GN=AMBP PE=1 SV=1	1.72125	99	VPGDGDEELLR		cleaved G-V@N-term	-0.00249977	1198.58	600.298	1198.58	600.299	2	11
1	110.11	38.64	P02760	AMBP_HUMAN	Protein AMBP OS=Homo sapiens GN=AMBP PE=1 SV=1	0.126679	99	KECREYCGVPGDGDEELLR	Carbamidomethyl(C)@3; Carbamidomethyl(C)@7	cleaved E-K@N-term; missed K-E@1; missed R-E@4	-4.01586	2277	1139.51	2281.01	1141.51	2	12
1	110.11	38.64	P02760	AMBP_HUMAN	Protein AMBP OS=Homo sapiens GN=AMBP PE=1 SV=1	0	99	AACNLPIVR	Carbamidomethyl(C)@3	cleaved V-A@N-term	0.000176373	1012.55	507.282	1012.55	507.282	2	9
1	110.11	38.64	P02760	AMBP_HUMAN	Protein AMBP OS=Homo sapiens GN=AMBP PE=1 SV=1	0	99	AACNLPIVR	Carbamidomethyl(C)@3	cleaved V-A@N-term	0.00219051	1012.55	507.283	1012.55	507.282	2	12
1	110.11	38.64	P02760	AMBP_HUMAN	Protein AMBP OS=Homo sapiens GN=AMBP PE=1 SV=1	0	99	AACNLPIVR	Carbamidomethyl(C)@3	cleaved V-A@N-term	0.000359476	1012.55	507.282	1012.55	507.282	2	10
1	110.11	38.64	P02760	AMBP_HUMAN	Protein AMBP OS=Homo sapiens GN=AMBP PE=1 SV=1	0	99	AACNLPIVR	Carbamidomethyl(C)@3	cleaved V-A@N-term	0.00235837	1012.55	507.283	1012.55	507.282	2	10
1	110.11	38.64	P02760	AMBP_HUMAN	Protein AMBP OS=Homo sapiens GN=AMBP PE=1 SV=1	0	99	AACNLPIVR	Carbamidomethyl(C)@3	cleaved V-A@N-term	0.00426713	1012.55	507.284	1012.55	507.282	2	11
1	110.11	38.64	P02760	AMBP_HUMAN	Protein AMBP OS=Homo sapiens GN=AMBP PE=1 SV=1	0	99	AFIQLWAFDAVK	Dioxidation(W)@6		0.00260843	1439.75	720.881	1439.74	720.88	2	15
1	110.11	38.64	P02760	AMBP_HUMAN	Protein AMBP OS=Homo sapiens GN=AMBP PE=1 SV=1	0	99	AFIQLWAFDAVK	Oxidation(W)@6		0.00213966	1423.75	712.883	1423.75	712.882	2	11
1	110.11	38.64	P02760	AMBP_HUMAN	Protein AMBP OS=Homo sapiens GN=AMBP PE=1 SV=1	0	99	AFIQLWAFDAVK	Oxidation(W)@6		-0.00115619	1423.75	712.882	1423.75	712.882	2	14
1	110.11	38.64	P02760	AMBP_HUMAN	Protein AMBP OS=Homo sapiens GN=AMBP PE=1 SV=1	0	99	AFIQLWAFDAVK	Oxidation(W)@6		0.00165138	1423.75	712.883	1423.75	712.882	2	14
1	110.11	38.64	P02760	AMBP_HUMAN	Protein AMBP OS=Homo sapiens GN=AMBP PE=1 SV=1	0	99	AFIQLWAFDAVK	Oxidation(W)@6		0.00152931	1423.75	712.883	1423.75	712.882	2	14
1	110.11	38.64	P02760	AMBP_HUMAN	Protein AMBP OS=Homo sapiens GN=AMBP PE=1 SV=1	0	99	AFIQLWAFDAVK	Oxidation(W)@6		-0.000912058	1423.75	712.882	1423.75	712.882	2	13
1	110.11	38.64	P02760	AMBP_HUMAN	Protein AMBP OS=Homo sapiens GN=AMBP PE=1 SV=1	0	99	AFIQLWAFDAVK	Oxidation(W)@6		-0.000545852	1423.75	712.882	1423.75	712.882	2	13
1	110.11	38.64	P02760	AMBP_HUMAN	Protein AMBP OS=Homo sapiens GN=AMBP PE=1 SV=1	0	99	AFIQLWAFDAVK	Oxidation(W)@6		0.00287207	1423.75	712.884	1423.75	712.882	2	12
1	110.11	38.64	P02760	AMBP_HUMAN	Protein AMBP OS=Homo sapiens GN=AMBP PE=1 SV=1	0	99	AFIQLWAFDAVK			0.00105943	1407.76	704.885	1407.76	704.885	2	15
1	110.11	38.64	P02760	AMBP_HUMAN	Protein AMBP OS=Homo sapiens GN=AMBP PE=1 SV=1	0	99	AFIQLWAFDAVK			0.0011815	1407.76	704.885	1407.76	704.885	2	13
1	110.11	38.64	P02760	AMBP_HUMAN	Protein AMBP OS=Homo sapiens GN=AMBP PE=1 SV=1	0	99	AVLPQEEEGSGGGQLVTEVTK	Dehydrated(S)@10		0.00262317	2109.06	704.028	2109.06	704.027	3	27
1	110.11	38.64	P02760	AMBP_HUMAN	Protein AMBP OS=Homo sapiens GN=AMBP PE=1 SV=1	0	99	AVLPQEEEGSGGGQLVTEVTK	Dehydrated(S)@10		0.00298938	2109.06	704.028	2109.06	704.027	3	28
1	110.11	38.64	P02760	AMBP_HUMAN	Protein AMBP OS=Homo sapiens GN=AMBP PE=1 SV=1	0	99	AVLPQEEEGSGGGQLVTEVTK	Dehydrated(S)@10		0.00153907	2109.06	704.028	2109.06	704.027	3	27
1	110.11	38.64	P02760	AMBP_HUMAN	Protein AMBP OS=Homo sapiens GN=AMBP PE=1 SV=1	0	99	AVLPQEEEGSGGGQLVTEVTK	Cation:Na(E)@8; Dehydrated(S)@10		0.00444945	2131.05	711.356	2131.04	711.354	3	16
1	110.11	38.64	P02760	AMBP_HUMAN	Protein AMBP OS=Homo sapiens GN=AMBP PE=1 SV=1	0	99	AVLPQEEEGSGGGQLVTEVTK	Dehydrated(S)@10		0.00153907	2109.06	704.028	2109.06	704.027	3	28
1	110.11	38.64	P02760	AMBP_HUMAN	Protein AMBP OS=Homo sapiens GN=AMBP PE=1 SV=1	0	99	AVLPQEEEGSGGGQLVTEVTK	Dehydrated(S)@10		0.00893708	2109.07	704.03	2109.06	704.027	3	28
1	110.11	38.64	P02760	AMBP_HUMAN	Protein AMBP OS=Homo sapiens GN=AMBP PE=1 SV=1	0	99	AVLPQEEEGSGGGQLVTEVTK	Dehydrated(S)@10		0.00472569	2109.06	704.029	2109.06	704.027	3	25
1	110.11	38.64	P02760	AMBP_HUMAN	Protein AMBP OS=Homo sapiens GN=AMBP PE=1 SV=1	0	99	AVLPQEEEGSGGGQLVTEVTKK	Dehydrated(S)@10	missed K-K@21	0.00336593	2237.16	746.726	2237.15	746.725	3	19
1	110.11	38.64	P02760	AMBP_HUMAN	Protein AMBP OS=Homo sapiens GN=AMBP PE=1 SV=1	0	99	AVLPQEEEGSGGGQLVTEVTKK	Dehydrated(S)@10	missed K-K@21	0.00322576	2237.16	746.726	2237.15	746.725	3	20
1	110.11	38.64	P02760	AMBP_HUMAN	Protein AMBP OS=Homo sapiens GN=AMBP PE=1 SV=1	0	99	CVLFPY	Carbamidomethyl(C)@1	cleaved Y-G@C-term	0.00236901	797.381	399.698	797.378	399.696	2	6
1	110.11	38.64	P02760	AMBP_HUMAN	Protein AMBP OS=Homo sapiens GN=AMBP PE=1 SV=1	0	99	CVLFPYGG	Carbamidomethyl(C)@1	cleaved G-C@C-term	0.000185904	911.421	456.718	911.421	456.718	2	11
1	110.11	38.64	P02760	AMBP_HUMAN	Protein AMBP OS=Homo sapiens GN=AMBP PE=1 SV=1	0	99	CVLFPYGG	Carbamidomethyl(C)@1; Amidated@C-term	cleaved G-C@C-term	0.000996774	910.438	456.226	910.437	456.226	2	9
1	110.11	38.64	P02760	AMBP_HUMAN	Protein AMBP OS=Homo sapiens GN=AMBP PE=1 SV=1	0	99	CVLFPYGGC	Carbamidomethyl(C)@1; Carbamidomethyl(C)@9	cleaved C-Q@C-term	-0.000735304	1071.45	536.733	1071.45	536.733	2	13
1	110.11	38.64	P02760	AMBP_HUMAN	Protein AMBP OS=Homo sapiens GN=AMBP PE=1 SV=1	0	99	CVLFPYGGCQGNGNK	Carbamidomethyl(C)@1; Carbamidomethyl(C)@9; Deamidated(N)@12		0.00686677	1670.72	557.916	1670.72	557.913	3	17
1	110.11	38.64	P02760	AMBP_HUMAN	Protein AMBP OS=Homo sapiens GN=AMBP PE=1 SV=1	0	99	CVLFPYGGCQGNGNK	Carbamidomethyl(C)@1; Carbamidomethyl(C)@9		0.00922756	1669.74	557.588	1669.73	557.585	3	18
1	110.11	38.64	P02760	AMBP_HUMAN	Protein AMBP OS=Homo sapiens GN=AMBP PE=1 SV=1	0	99	CVLFPYGGCQGNGNK	Carbamidomethyl(C)@1; Carbamidomethyl(C)@9; Deamidated(N)@12		0.00408372	1670.72	557.915	1670.72	557.913	3	20
1	110.11	38.64	P02760	AMBP_HUMAN	Protein AMBP OS=Homo sapiens GN=AMBP PE=1 SV=1	0	99	CVLFPYGGCQGNGNK	Carbamidomethyl(C)@1; Carbamidomethyl(C)@9		0.00145221	1669.74	557.586	1669.73	557.585	3	17
1	110.11	38.64	P02760	AMBP_HUMAN	Protein AMBP OS=Homo sapiens GN=AMBP PE=1 SV=1	0	99	CVLFPYGGCQGNGNK	Carbamidomethyl(C)@1; Carbamidomethyl(C)@9; Deamidated(N)@12		-0.00423487	1670.71	557.912	1670.72	557.913	3	18
1	110.11	38.64	P02760	AMBP_HUMAN	Protein AMBP OS=Homo sapiens GN=AMBP PE=1 SV=1	0	99	CVLFPYGGCQGNGNK	Carbamidomethyl(C)@1; Carbamidomethyl(C)@9; Deamidated(N)@12		0.00894867	1670.73	557.916	1670.72	557.913	3	19
1	110.11	38.64	P02760	AMBP_HUMAN	Protein AMBP OS=Homo sapiens GN=AMBP PE=1 SV=1	0	99	CVLFPYGGCQGNGNK	Carbamidomethyl(C)@1; Carbamidomethyl(C)@9; Deamidated(N)@12		0.00510347	1670.72	557.915	1670.72	557.913	3	20
1	110.11	38.64	P02760	AMBP_HUMAN	Protein AMBP OS=Homo sapiens GN=AMBP PE=1 SV=1	0	99	CVLFPYGGCQGNGNK	Carbamidomethyl(C)@1; Carbamidomethyl(C)@9		-2.00713	1667.73	556.916	1669.73	557.585	3	17
1	110.11	38.64	P02760	AMBP_HUMAN	Protein AMBP OS=Homo sapiens GN=AMBP PE=1 SV=1	0	99	CVLFPYGGCQGNGNK	Carbamidomethyl(C)@1; Carbamidomethyl(C)@9; Cation:Na@C-term		-0.0025491	1691.71	564.912	1691.72	564.913	3	12
1	110.11	38.64	P02760	AMBP_HUMAN	Protein AMBP OS=Homo sapiens GN=AMBP PE=1 SV=1	0	99	CVLFPYGGCQGNGNK	Carbamidomethyl(C)@1; Carbamidomethyl(C)@9		0.00646028	1669.74	557.587	1669.73	557.585	3	22
1	110.11	38.64	P02760	AMBP_HUMAN	Protein AMBP OS=Homo sapiens GN=AMBP PE=1 SV=1	0	99	CVLFPYGGCQGNGNK	Carbamidomethyl(C)@1; Carbamidomethyl(C)@9; Cation:Na@C-term		-0.0025491	1691.71	564.912	1691.72	564.913	3	14
1	110.11	38.64	P02760	AMBP_HUMAN	Protein AMBP OS=Homo sapiens GN=AMBP PE=1 SV=1	0	99	CVLFPYGGCQGNGNK	Carbamidomethyl(C)@1; Pro->pyro-Glu(P)@5; Carbamidomethyl(C)@9		0.0388034	1683.75	562.258	1683.71	562.245	3	14
1	110.11	38.64	P02760	AMBP_HUMAN	Protein AMBP OS=Homo sapiens GN=AMBP PE=1 SV=1	0	99	CVLFPYGGCQGNGNK	Carbamidomethyl(C)@1; Carbamidomethyl(C)@9		0.00646028	1669.74	557.587	1669.73	557.585	3	19
1	110.11	38.64	P02760	AMBP_HUMAN	Protein AMBP OS=Homo sapiens GN=AMBP PE=1 SV=1	0	99	CVLFPYGGCQGNGNK	Carbamidomethyl(C)@1; Carbamidomethyl(C)@9; Ammonia-loss(N)@14		-0.00251801	1652.71	827.36	1652.71	827.361	2	12
1	110.11	38.64	P02760	AMBP_HUMAN	Protein AMBP OS=Homo sapiens GN=AMBP PE=1 SV=1	0	99	CVLFPYGGCQGNGNK	Carbamidomethyl(C)@1; Carbamidomethyl(C)@9; Deamidated(N)@12		0.00259626	1670.72	557.914	1670.72	557.913	3	22
1	110.11	38.64	P02760	AMBP_HUMAN	Protein AMBP OS=Homo sapiens GN=AMBP PE=1 SV=1	0	99	CVLFPYGGCQGNGNK	Carbamidomethyl(C)@1; Carbamidomethyl(C)@9; Deamidated(N)@12		-0.00150765	1670.72	836.366	1670.72	836.366	2	18
1	110.11	38.64	P02760	AMBP_HUMAN	Protein AMBP OS=Homo sapiens GN=AMBP PE=1 SV=1	0	99	CVLFPYGGCQGNGNK	Carbamidomethyl(C)@1; Carbamidomethyl(C)@9; Deamidated(N)@12; Didehydro@C-term		-0.00389415	1668.7	835.357	1668.7	835.359	2	12
1	110.11	38.64	P02760	AMBP_HUMAN	Protein AMBP OS=Homo sapiens GN=AMBP PE=1 SV=1	0	99	CVLFPYGGCQGNGNK	Carbamidomethyl(C)@1; Carbamidomethyl(C)@9; Deamidated(N)@12; Cation:Na@C-term		-0.000737003	1692.7	565.24	1692.7	565.241	3	13
1	110.11	38.64	P02760	AMBP_HUMAN	Protein AMBP OS=Homo sapiens GN=AMBP PE=1 SV=1	0	99	CVLFPYGGCQGNGNK	Carbamidomethyl(C)@1; Carbamidomethyl(C)@9; Deamidated(N)@12		0.00314557	1670.72	557.914	1670.72	557.913	3	22
1	110.11	38.64	P02760	AMBP_HUMAN	Protein AMBP OS=Homo sapiens GN=AMBP PE=1 SV=1	0	99	CVLFPYGGCQGNGNK	Carbamidomethyl(C)@1; Pro->pyro-Glu(P)@5; Carbamidomethyl(C)@9; Deamidated(N)@12		0.0391507	1684.74	562.586	1684.7	562.573	3	15
1	110.11	38.64	P02760	AMBP_HUMAN	Protein AMBP OS=Homo sapiens GN=AMBP PE=1 SV=1	0	99	CVLFPYGGCQGNGNK	Carbamidomethyl(C)@1; Carbamidomethyl(C)@9; Deamidated(N)@12		0.00314557	1670.72	557.914	1670.72	557.913	3	22
1	110.11	38.64	P02760	AMBP_HUMAN	Protein AMBP OS=Homo sapiens GN=AMBP PE=1 SV=1	0	99	CVLFPYGGCQGNGNK	Carbamidomethyl(C)@1; Pro->pyro-Glu(P)@5; Carbamidomethyl(C)@9; Deamidated(N)@12		0.0391507	1684.74	562.586	1684.7	562.573	3	13
1	110.11	38.64	P02760	AMBP_HUMAN	Protein AMBP OS=Homo sapiens GN=AMBP PE=1 SV=1	0	99	CVLFPYGGCQGNGNK	Carbamidomethyl(C)@1; Carbamidomethyl(C)@9; Deamidated(N)@12		0.00332867	1670.72	557.914	1670.72	557.913	3	20
1	110.11	38.64	P02760	AMBP_HUMAN	Protein AMBP OS=Homo sapiens GN=AMBP PE=1 SV=1	0	99	CVLFPYGGCQGNGNK	Carbamidomethyl(C)@1; Carbamidomethyl(C)@9; Deamidated(N)@12		0.00094833	1670.72	557.914	1670.72	557.913	3	18
1	110.11	38.64	P02760	AMBP_HUMAN	Protein AMBP OS=Homo sapiens GN=AMBP PE=1 SV=1	0	99	CVLFPYGGCQGNGNK	Carbamidomethyl(C)@1; Carbamidomethyl(C)@9; Ammonia-loss(N)@12		-0.00154146	1652.71	827.36	1652.71	827.361	2	11
1	110.11	38.64	P02760	AMBP_HUMAN	Protein AMBP OS=Homo sapiens GN=AMBP PE=1 SV=1	0	99	CVLFPYGGCQGNGNK	Carbamidomethyl(C)@1; Carbamidomethyl(C)@9; Ammonia-loss(N)@12		-0.00154146	1652.71	827.36	1652.71	827.361	2	11
1	110.11	38.64	P02760	AMBP_HUMAN	Protein AMBP OS=Homo sapiens GN=AMBP PE=1 SV=1	0	99	CVLFPYGGCQGNGNK	Carbamidomethyl(C)@1; Carbamidomethyl(C)@9		0.00446686	1669.74	557.587	1669.73	557.585	3	17
1	110.11	38.64	P02760	AMBP_HUMAN	Protein AMBP OS=Homo sapiens GN=AMBP PE=1 SV=1	0	99	CVLFPYGGCQGNGNK	Carbamidomethyl(C)@1; Carbamidomethyl(C)@9; Deamidated(N)@12		-0.00162631	1670.72	836.365	1670.72	836.366	2	16
1	110.11	38.64	P02760	AMBP_HUMAN	Protein AMBP OS=Homo sapiens GN=AMBP PE=1 SV=1	0	99	CVLFPYGGCQGNGNK	Carbamidomethyl(C)@1; Carbamidomethyl(C)@9; Deamidated(N)@12		0.00481613	1670.72	557.915	1670.72	557.913	3	18
1	110.11	38.64	P02760	AMBP_HUMAN	Protein AMBP OS=Homo sapiens GN=AMBP PE=1 SV=1	0	99	CVLFPYGGCQGNGNK	Carbamidomethyl(C)@1; Carbamidomethyl(C)@9; Deamidated(N)@12		0.00142541	1670.72	836.367	1670.72	836.366	2	14
1	110.11	38.64	P02760	AMBP_HUMAN	Protein AMBP OS=Homo sapiens GN=AMBP PE=1 SV=1	0	99	CVLFPYGGCQGNGNK	Carbamidomethyl(C)@1; Carbamidomethyl(C)@9; Deamidated(N)@12		0.00215782	1670.72	836.367	1670.72	836.366	2	13
1	110.11	38.64	P02760	AMBP_HUMAN	Protein AMBP OS=Homo sapiens GN=AMBP PE=1 SV=1	0	99	CVLFPYGGCQGNGNK	Carbamidomethyl(C)@1; Carbamidomethyl(C)@9		0.000100576	1669.73	835.874	1669.73	835.874	2	16
1	110.11	38.64	P02760	AMBP_HUMAN	Protein AMBP OS=Homo sapiens GN=AMBP PE=1 SV=1	0	99	CVLFPYGGCQGNGNK	Carbamidomethyl(C)@1; Carbamidomethyl(C)@9; Deamidated(N)@12		-0.00150765	1670.72	836.366	1670.72	836.366	2	15
1	110.11	38.64	P02760	AMBP_HUMAN	Protein AMBP OS=Homo sapiens GN=AMBP PE=1 SV=1	0	99	CVLFPYGGCQGNGNK	Carbamidomethyl(C)@1; Carbamidomethyl(C)@9; Deamidated(N)@12		-0.00114145	1670.72	836.366	1670.72	836.366	2	15
1	110.11	38.64	P02760	AMBP_HUMAN	Protein AMBP OS=Homo sapiens GN=AMBP PE=1 SV=1	0	99	EDSCQLGY	Carbamidomethyl(C)@4	cleaved Y-S@C-term	0.000216091	970.37	486.192	970.37	486.192	2	9
1	110.11	38.64	P02760	AMBP_HUMAN	Protein AMBP OS=Homo sapiens GN=AMBP PE=1 SV=1	0	99	EDSCQLGY	Carbamidomethyl(C)@4	cleaved Y-S@C-term	3.29879e-05	970.37	486.192	970.37	486.192	2	11
1	110.11	38.64	P02760	AMBP_HUMAN	Protein AMBP OS=Homo sapiens GN=AMBP PE=1 SV=1	0	99	EDSCQLGY	Carbamidomethyl(C)@4	cleaved Y-S@C-term	3.29879e-05	970.37	486.192	970.37	486.192	2	11
1	110.11	38.64	P02760	AMBP_HUMAN	Protein AMBP OS=Homo sapiens GN=AMBP PE=1 SV=1	0	99	EDSCQLGY	Carbamidomethyl(C)@4	cleaved Y-S@C-term	-0.00216425	970.368	486.191	970.37	486.192	2	9
1	110.11	38.64	P02760	AMBP_HUMAN	Protein AMBP OS=Homo sapiens GN=AMBP PE=1 SV=1	0	99	EDSCQLGY	Carbamidomethyl(C)@4	cleaved Y-S@C-term	-0.00231253	970.368	486.191	970.37	486.192	2	9
1	110.11	38.64	P02760	AMBP_HUMAN	Protein AMBP OS=Homo sapiens GN=AMBP PE=1 SV=1	0	99	EDSCQLGY	Carbamidomethyl(C)@4	cleaved Y-S@C-term	-0.0025787	970.368	486.191	970.37	486.192	2	9
1	110.11	38.64	P02760	AMBP_HUMAN	Protein AMBP OS=Homo sapiens GN=AMBP PE=1 SV=1	0	99	EDSCQLGY	Carbamidomethyl(C)@4	cleaved Y-S@C-term	-0.0025787	970.368	486.191	970.37	486.192	2	10
1	110.11	38.64	P02760	AMBP_HUMAN	Protein AMBP OS=Homo sapiens GN=AMBP PE=1 SV=1	0	99	EDSCQLGY	Carbamidomethyl(C)@4	cleaved Y-S@C-term	0.00166156	970.372	486.193	970.37	486.192	2	8
1	110.11	38.64	P02760	AMBP_HUMAN	Protein AMBP OS=Homo sapiens GN=AMBP PE=1 SV=1	0	99	EDSCQLGY	Carbamidomethyl(C)@4	cleaved Y-S@C-term	0.00202777	970.372	486.193	970.37	486.192	2	9
1	110.11	38.64	P02760	AMBP_HUMAN	Protein AMBP OS=Homo sapiens GN=AMBP PE=1 SV=1	0	99	EDSCQLGYSAGP	Carbamidomethyl(C)@4; Amidated@C-term	cleaved P-C@C-term	-0.00135255	1281.53	641.771	1281.53	641.772	2	13
1	110.11	38.64	P02760	AMBP_HUMAN	Protein AMBP OS=Homo sapiens GN=AMBP PE=1 SV=1	0	99	EDSCQLGYSAGPC	Carbamidomethyl(C)@4; Carbamidomethyl(C)@13	cleaved C-M@C-term	-0.00317901	1442.54	722.278	1442.54	722.279	2	14
1	110.11	38.64	P02760	AMBP_HUMAN	Protein AMBP OS=Homo sapiens GN=AMBP PE=1 SV=1	0	99	EDSCQLGYSAGPC	Carbamidomethyl(C)@4; Carbamidomethyl(C)@13	cleaved C-M@C-term	-0.00317901	1442.54	722.278	1442.54	722.279	2	18
1	110.11	38.64	P02760	AMBP_HUMAN	Protein AMBP OS=Homo sapiens GN=AMBP PE=1 SV=1	0	99	EDSCQLGYSAGPC	Carbamidomethyl(C)@4; Carbamidomethyl(C)@13	cleaved C-M@C-term	-0.000531163	1442.54	722.279	1442.54	722.279	2	15
1	110.11	38.64	P02760	AMBP_HUMAN	Protein AMBP OS=Homo sapiens GN=AMBP PE=1 SV=1	0	99	EDSCQLGYSAGPC	Carbamidomethyl(C)@4; Carbamidomethyl(C)@13	cleaved C-M@C-term	-0.00288939	1442.54	722.278	1442.54	722.279	2	16
1	110.11	38.64	P02760	AMBP_HUMAN	Protein AMBP OS=Homo sapiens GN=AMBP PE=1 SV=1	0	99	EDSCQLGYSAGPCMGMTSR	Carbamidomethyl(C)@4; Carbamidomethyl(C)@13; Oxidation(M)@14; Oxidation(M)@16		0.00216826	2137.82	713.614	2137.82	713.613	3	20
1	110.11	38.64	P02760	AMBP_HUMAN	Protein AMBP OS=Homo sapiens GN=AMBP PE=1 SV=1	0	99	EDSCQLGYSAGPCMGMTSR	Carbamidomethyl(C)@4; Carbamidomethyl(C)@13; Oxidation(M)@16		-0.000440718	2121.82	708.281	2121.82	708.281	3	19
1	110.11	38.64	P02760	AMBP_HUMAN	Protein AMBP OS=Homo sapiens GN=AMBP PE=1 SV=1	0	99	EDSCQLGYSAGPCMGMTSR	Carbamidomethyl(C)@4; Carbamidomethyl(C)@13		0.000244513	2105.83	702.95	2105.83	702.95	3	22
1	110.11	38.64	P02760	AMBP_HUMAN	Protein AMBP OS=Homo sapiens GN=AMBP PE=1 SV=1	0	99	EDSCQLGYSAGPCMGMTSR	Carbamidomethyl(C)@4; Carbamidomethyl(C)@13; Oxidation(M)@14; Oxidation(M)@16		-0.00212059	2137.82	713.612	2137.82	713.613	3	20
1	110.11	38.64	P02760	AMBP_HUMAN	Protein AMBP OS=Homo sapiens GN=AMBP PE=1 SV=1	0	99	EDSCQLGYSAGPCMGMTSR	Carbamidomethyl(C)@4; Carbamidomethyl(C)@13; Oxidation(M)@14; Oxidation(M)@16		-0.00212059	2137.82	713.612	2137.82	713.613	3	20
1	110.11	38.64	P02760	AMBP_HUMAN	Protein AMBP OS=Homo sapiens GN=AMBP PE=1 SV=1	0	99	EDSCQLGYSAGPCMGMTSR	Carbamidomethyl(C)@4; Carbamidomethyl(C)@13; Oxidation(M)@14; Oxidation(M)@16		0.00337251	2137.82	713.614	2137.82	713.613	3	22
1	110.11	38.64	P02760	AMBP_HUMAN	Protein AMBP OS=Homo sapiens GN=AMBP PE=1 SV=1	0	99	EDSCQLGYSAGPCMGMTSR	Carbamidomethyl(C)@4; Carbamidomethyl(C)@13; Oxidation(M)@14		3.07435e-06	2121.82	708.281	2121.82	708.281	3	23
1	110.11	38.64	P02760	AMBP_HUMAN	Protein AMBP OS=Homo sapiens GN=AMBP PE=1 SV=1	0	99	EDSCQLGYSAGPCMGMTSR	Carbamidomethyl(C)@4; Carbamidomethyl(C)@13; Oxidation(M)@14		-0.000912442	2121.82	708.281	2121.82	708.281	3	22
1	110.11	38.64	P02760	AMBP_HUMAN	Protein AMBP OS=Homo sapiens GN=AMBP PE=1 SV=1	0	99	EDSCQLGYSAGPCMGMTSR	Carbamidomethyl(C)@4; Carbamidomethyl(C)@13; Oxidation(M)@16		0.00512997	2121.83	708.283	2121.82	708.281	3	19
1	110.11	38.64	P02760	AMBP_HUMAN	Protein AMBP OS=Homo sapiens GN=AMBP PE=1 SV=1	0	99	EDSCQLGYSAGPCMGMTSR	Carbamidomethyl(C)@4; Carbamidomethyl(C)@13; Oxidation(M)@16		0.000552384	2121.82	708.282	2121.82	708.281	3	23
1	110.11	38.64	P02760	AMBP_HUMAN	Protein AMBP OS=Homo sapiens GN=AMBP PE=1 SV=1	0	99	EDSCQLGYSAGPCMGMTSR	Carbamidomethyl(C)@4; Carbamidomethyl(C)@13		0.00505566	2105.83	702.952	2105.83	702.95	3	21
1	110.11	38.64	P02760	AMBP_HUMAN	Protein AMBP OS=Homo sapiens GN=AMBP PE=1 SV=1	0	99	EDSCQLGYSAGPCMGMTSR	Carbamidomethyl(C)@4; Carbamidomethyl(C)@13; Oxidation(M)@14; Oxidation(M)@16		0.00160316	2137.82	713.614	2137.82	713.613	3	20
1	110.11	38.64	P02760	AMBP_HUMAN	Protein AMBP OS=Homo sapiens GN=AMBP PE=1 SV=1	0	99	EDSCQLGYSAGPCMGMTSR	Carbamidomethyl(C)@4; Carbamidomethyl(C)@13; Oxidation(M)@14; Oxidation(M)@16		0.00160316	2137.82	713.614	2137.82	713.613	3	21
1	110.11	38.64	P02760	AMBP_HUMAN	Protein AMBP OS=Homo sapiens GN=AMBP PE=1 SV=1	0	99	EDSCQLGYSAGPCMGMTSR	Carbamidomethyl(C)@4; Carbamidomethyl(C)@13; Oxidation(M)@14		0.00233489	2121.82	708.282	2121.82	708.281	3	23
1	110.11	38.64	P02760	AMBP_HUMAN	Protein AMBP OS=Homo sapiens GN=AMBP PE=1 SV=1	0	99	EDSCQLGYSAGPCMGMTSR	Carbamidomethyl(C)@4; Carbamidomethyl(C)@13; Oxidation(M)@16		-0.0011441	2121.82	708.281	2121.82	708.281	3	21
1	110.11	38.64	P02760	AMBP_HUMAN	Protein AMBP OS=Homo sapiens GN=AMBP PE=1 SV=1	0	99	EDSCQLGYSAGPCMGMTSR	Glu->pyro-Glu@N-term; No Carbamidomethyl(C)@4; Carbamidomethyl(C)@13; Oxidation(M)@14; Oxidation(M)@16		0.0175549	2062.8	688.608	2062.79	688.602	3	14
1	110.11	38.64	P02760	AMBP_HUMAN	Protein AMBP OS=Homo sapiens GN=AMBP PE=1 SV=1	0	99	EDSCQLGYSAGPCMGMTSR	Carbamidomethyl(C)@4; Carbamidomethyl(C)@13; Oxidation(M)@14; Oxidation(M)@16		0.000242291	2137.82	713.613	2137.82	713.613	3	21
1	110.11	38.64	P02760	AMBP_HUMAN	Protein AMBP OS=Homo sapiens GN=AMBP PE=1 SV=1	0	99	EDSCQLGYSAGPCMGMTSR	Cation:Na(E)@1; Carbamidomethyl(C)@4; Carbamidomethyl(C)@13; Oxidation(M)@14; Oxidation(M)@16		-0.00129471	2159.8	720.94	2159.8	720.94	3	12
1	110.11	38.64	P02760	AMBP_HUMAN	Protein AMBP OS=Homo sapiens GN=AMBP PE=1 SV=1	0	99	EDSCQLGYSAGPCMGMTSR	Cation:Na(E)@1; Carbamidomethyl(C)@4; Carbamidomethyl(C)@13; Oxidation(M)@14; Oxidation(M)@16		-0.00129471	2159.8	720.94	2159.8	720.94	3	13
1	110.11	38.64	P02760	AMBP_HUMAN	Protein AMBP OS=Homo sapiens GN=AMBP PE=1 SV=1	0	99	EDSCQLGYSAGPCMGMTSR	Carbamidomethyl(C)@4; Pro->pyro-Glu(P)@12; Carbamidomethyl(C)@13; Oxidation(M)@14; Oxidation(M)@16		0.035859	2151.83	718.285	2151.8	718.273	3	16
1	110.11	38.64	P02760	AMBP_HUMAN	Protein AMBP OS=Homo sapiens GN=AMBP PE=1 SV=1	0	99	EDSCQLGYSAGPCMGMTSR	Carbamidomethyl(C)@4; Pro->pyro-Glu(P)@12; Carbamidomethyl(C)@13; Oxidation(M)@16		-0.00373297	2135.8	712.94	2135.8	712.941	3	18
1	110.11	38.64	P02760	AMBP_HUMAN	Protein AMBP OS=Homo sapiens GN=AMBP PE=1 SV=1	0	99	EDSCQLGYSAGPCMGMTSR	Propionamide@N-term; No Carbamidomethyl(C)@4; Carbamidomethyl(C)@13; Oxidation(M)@14; Oxidation(M)@16		-0.000343435	2151.83	718.285	2151.83	718.285	3	18
1	110.11	38.64	P02760	AMBP_HUMAN	Protein AMBP OS=Homo sapiens GN=AMBP PE=1 SV=1	0	99	EDSCQLGYSAGPCMGMTSR	Carbamidomethyl(C)@4; Carbamidomethyl(C)@13; Oxidation(M)@14; Oxidation(M)@16		-0.00103943	2137.82	713.613	2137.82	713.613	3	21
1	110.11	38.64	P02760	AMBP_HUMAN	Protein AMBP OS=Homo sapiens GN=AMBP PE=1 SV=1	0	99	EDSCQLGYSAGPCMGMTSR	Propionamide@N-term; No Carbamidomethyl(C)@4; Carbamidomethyl(C)@13; Oxidation(M)@14; Oxidation(M)@16		-0.00382239	2151.83	718.284	2151.83	718.285	3	19
1	110.11	38.64	P02760	AMBP_HUMAN	Protein AMBP OS=Homo sapiens GN=AMBP PE=1 SV=1	0	99	EDSCQLGYSAGPCMGMTSR	Carbamidomethyl(C)@4; Carbamidomethyl(C)@13; Oxidation(M)@14; Dioxidation(M)@16		0.000100823	2153.81	718.945	2153.81	718.945	3	21
1	110.11	38.64	P02760	AMBP_HUMAN	Protein AMBP OS=Homo sapiens GN=AMBP PE=1 SV=1	0	99	EDSCQLGYSAGPCMGMTSR	Carbamidomethyl(C)@4; Carbamidomethyl(C)@13; Oxidation(M)@14; Carbamyl(M)@16		0.00160224	2164.83	722.617	2164.83	722.617	3	20
1	110.11	38.64	P02760	AMBP_HUMAN	Protein AMBP OS=Homo sapiens GN=AMBP PE=1 SV=1	0	99	EDSCQLGYSAGPCMGMTSR	Carbamidomethyl(C)@4; Carbamidomethyl(C)@13; Oxidation(M)@14; Dioxidation(M)@16		0.000100823	2153.81	718.945	2153.81	718.945	3	22
1	110.11	38.64	P02760	AMBP_HUMAN	Protein AMBP OS=Homo sapiens GN=AMBP PE=1 SV=1	0	99	EDSCQLGYSAGPCMGMTSR	Carbamidomethyl(C)@4; Carbamidomethyl(C)@13; Oxidation(M)@14; Oxidation(M)@16		-0.00433528	2137.81	713.612	2137.82	713.613	3	21
1	110.11	38.64	P02760	AMBP_HUMAN	Protein AMBP OS=Homo sapiens GN=AMBP PE=1 SV=1	0	99	EDSCQLGYSAGPCMGMTSR	Carbamidomethyl(C)@4; Carbamidomethyl(C)@13; Oxidation(M)@14; Oxidation(M)@16		-0.00158874	2137.82	713.612	2137.82	713.613	3	18
1	110.11	38.64	P02760	AMBP_HUMAN	Protein AMBP OS=Homo sapiens GN=AMBP PE=1 SV=1	0	99	EDSCQLGYSAGPCMGMTSR	Carbamidomethyl(C)@4; Carbamidomethyl(C)@13; Oxidation(M)@14; Oxidation(M)@16		-0.0054339	2137.81	713.611	2137.82	713.613	3	20
1	110.11	38.64	P02760	AMBP_HUMAN	Protein AMBP OS=Homo sapiens GN=AMBP PE=1 SV=1	0	99	EDSCQLGYSAGPCMGMTSR	Carbamidomethyl(C)@4; Carbamidomethyl(C)@13; Oxidation(M)@14; Oxidation(M)@16		-0.00103943	2137.82	713.613	2137.82	713.613	3	21
1	110.11	38.64	P02760	AMBP_HUMAN	Protein AMBP OS=Homo sapiens GN=AMBP PE=1 SV=1	0	99	EDSCQLGYSAGPCMGMTSR	Carbamidomethyl(C)@4; Carbamidomethyl(C)@13; Oxidation(M)@14; Oxidation(M)@16		-0.00103943	2137.82	713.613	2137.82	713.613	3	19
1	110.11	38.64	P02760	AMBP_HUMAN	Protein AMBP OS=Homo sapiens GN=AMBP PE=1 SV=1	0	99	EDSCQLGYSAGPCMGMTSR	Glu->pyro-Glu@N-term; No Carbamidomethyl(C)@4; Carbamidomethyl(C)@13; Oxidation(M)@16		0.00981869	2046.8	683.274	2046.79	683.271	3	13
1	110.11	38.64	P02760	AMBP_HUMAN	Protein AMBP OS=Homo sapiens GN=AMBP PE=1 SV=1	0	99	EDSCQLGYSAGPCMGMTSR	Carbamidomethyl(C)@4; Carbamidomethyl(C)@13; Oxidation(M)@14; Oxidation(M)@16		-0.00671562	2137.81	713.611	2137.82	713.613	3	19
1	110.11	38.64	P02760	AMBP_HUMAN	Protein AMBP OS=Homo sapiens GN=AMBP PE=1 SV=1	0	99	EDSCQLGYSAGPCMGMTSR	Carbamidomethyl(C)@4; Carbamidomethyl(C)@13; Oxidation(M)@14; Oxidation(M)@16		-0.00580011	2137.81	713.611	2137.82	713.613	3	19
1	110.11	38.64	P02760	AMBP_HUMAN	Protein AMBP OS=Homo sapiens GN=AMBP PE=1 SV=1	0	99	EDSCQLGYSAGPCMGMTSR	Carbamidomethyl(C)@4; Carbamidomethyl(C)@13; Oxidation(M)@14; Oxidation(M)@16		-0.000673223	2137.82	713.613	2137.82	713.613	3	18
1	110.11	38.64	P02760	AMBP_HUMAN	Protein AMBP OS=Homo sapiens GN=AMBP PE=1 SV=1	0	99	EDSCQLGYSAGPCMGMTSR	Carbamidomethyl(C)@4; Carbamidomethyl(C)@13; Oxidation(M)@14; Oxidation(M)@16		-0.0054339	2137.81	713.611	2137.82	713.613	3	18
1	110.11	38.64	P02760	AMBP_HUMAN	Protein AMBP OS=Homo sapiens GN=AMBP PE=1 SV=1	0	99	EDSCQLGYSAGPCMGMTSR	Carbamidomethyl(C)@4; Carbamidomethyl(C)@13; Oxidation(M)@14		0.00166477	2121.82	708.282	2121.82	708.281	3	20
1	110.11	38.64	P02760	AMBP_HUMAN	Protein AMBP OS=Homo sapiens GN=AMBP PE=1 SV=1	0	99	EDSCQLGYSAGPCMGMTSR	Cation:Na(E)@1; Carbamidomethyl(C)@4; Carbamidomethyl(C)@13; Oxidation(M)@14		-0.00701225	2143.8	715.606	2143.8	715.609	3	13
1	110.11	38.64	P02760	AMBP_HUMAN	Protein AMBP OS=Homo sapiens GN=AMBP PE=1 SV=1	0	99	EDSCQLGYSAGPCMGMTSR	Carbamidomethyl(C)@4; Carbamidomethyl(C)@13; Oxidation(M)@14		0.00166477	2121.82	708.282	2121.82	708.281	3	25
1	110.11	38.64	P02760	AMBP_HUMAN	Protein AMBP OS=Homo sapiens GN=AMBP PE=1 SV=1	0	99	EDSCQLGYSAGPCMGMTSR	Cation:Na(D)@2; Carbamidomethyl(C)@4; Carbamidomethyl(C)@13; Oxidation(M)@14		-0.00701225	2143.8	715.606	2143.8	715.609	3	17
1	110.11	38.64	P02760	AMBP_HUMAN	Protein AMBP OS=Homo sapiens GN=AMBP PE=1 SV=1	0	99	EDSCQLGYSAGPCMGMTSR	Carbamidomethyl(C)@4; Pro->pyro-Glu(P)@12; Carbamidomethyl(C)@13; Oxidation(M)@14		0.0367328	2135.84	712.953	2135.8	712.941	3	15
1	110.11	38.64	P02760	AMBP_HUMAN	Protein AMBP OS=Homo sapiens GN=AMBP PE=1 SV=1	0	99	EDSCQLGYSAGPCMGMTSR	Carbamidomethyl(C)@4; Carbamidomethyl(C)@13; Oxidation(M)@14		0.00166477	2121.82	708.282	2121.82	708.281	3	22
1	110.11	38.64	P02760	AMBP_HUMAN	Protein AMBP OS=Homo sapiens GN=AMBP PE=1 SV=1	0	99	EDSCQLGYSAGPCMGMTSR	Carbamidomethyl(C)@4; Carbamidomethyl(C)@13; Oxidation(M)@16; Cation:Na@C-term		-0.00829397	2143.8	715.606	2143.8	715.609	3	15
1	110.11	38.64	P02760	AMBP_HUMAN	Protein AMBP OS=Homo sapiens GN=AMBP PE=1 SV=1	0	99	EDSCQLGYSAGPCMGMTSR	Propionamide@N-term; No Carbamidomethyl(C)@4; Carbamidomethyl(C)@13; Oxidation(M)@14		0.000347271	2135.84	712.953	2135.84	712.953	3	21
1	110.11	38.64	P02760	AMBP_HUMAN	Protein AMBP OS=Homo sapiens GN=AMBP PE=1 SV=1	0	99	EDSCQLGYSAGPCMGMTSR	Carbamidomethyl(C)@4; Carbamidomethyl(C)@13; Oxidation(M)@16		-0.0027297	2121.82	708.28	2121.82	708.281	3	23
1	110.11	38.64	P02760	AMBP_HUMAN	Protein AMBP OS=Homo sapiens GN=AMBP PE=1 SV=1	0	99	EDSCQLGYSAGPCMGMTSR	Cation:Na(E)@1; Carbamidomethyl(C)@4; Carbamidomethyl(C)@13; Oxidation(M)@16		-0.00829397	2143.8	715.606	2143.8	715.609	3	15
1	110.11	38.64	P02760	AMBP_HUMAN	Protein AMBP OS=Homo sapiens GN=AMBP PE=1 SV=1	0	99	EDSCQLGYSAGPCMGMTSR	Carbamidomethyl(C)@4; Carbamidomethyl(C)@13; Oxidation(M)@16		-0.0027297	2121.82	708.28	2121.82	708.281	3	21
1	110.11	38.64	P02760	AMBP_HUMAN	Protein AMBP OS=Homo sapiens GN=AMBP PE=1 SV=1	0	99	EDSCQLGYSAGPCMGMTSR	Propionamide@N-term; No Carbamidomethyl(C)@4; Carbamidomethyl(C)@13; Oxidation(M)@16		0.0116997	2135.85	712.957	2135.84	712.953	3	18
1	110.11	38.64	P02760	AMBP_HUMAN	Protein AMBP OS=Homo sapiens GN=AMBP PE=1 SV=1	0	99	EDSCQLGYSAGPCMGMTSR	Carbamidomethyl(C)@4; Carbamidomethyl(C)@13; Oxidation(M)@14; Oxidation(M)@16		0.010313	2137.83	713.616	2137.82	713.613	3	20
1	110.11	38.64	P02760	AMBP_HUMAN	Protein AMBP OS=Homo sapiens GN=AMBP PE=1 SV=1	0	99	EDSCQLGYSAGPCMGMTSR	Glu->pyro-Glu@N-term; Carbamidomethyl(C)@4; Deamidated(Q)@5; Oxidation(P)@12; Carbamidomethyl(C)@13; Oxidation(M)@14		0.0251345	2120.82	707.946	2120.79	707.938	3	16
1	110.11	38.64	P02760	AMBP_HUMAN	Protein AMBP OS=Homo sapiens GN=AMBP PE=1 SV=1	0	99	EDSCQLGYSAGPCMGMTSR	Glu->pyro-Glu@N-term; Carbamidomethyl(C)@4; Carbamidomethyl(C)@13; Oxidation(M)@14; Oxidation(M)@16		0.0119714	2119.82	707.614	2119.81	707.609	3	20
1	110.11	38.64	P02760	AMBP_HUMAN	Protein AMBP OS=Homo sapiens GN=AMBP PE=1 SV=1	0	99	EDSCQLGYSAGPCMGMTSR	Carbamidomethyl(C)@4; Carbamidomethyl(C)@13; Oxidation(M)@14; Oxidation(M)@16		0.00408745	2137.82	713.614	2137.82	713.613	3	19
1	110.11	38.64	P02760	AMBP_HUMAN	Protein AMBP OS=Homo sapiens GN=AMBP PE=1 SV=1	0	99	EDSCQLGYSAGPCMGMTSR	Carbamidomethyl(C)@4; Carbamidomethyl(C)@13; Oxidation(M)@16		0.00660855	2121.83	708.284	2121.82	708.281	3	19
1	110.11	38.64	P02760	AMBP_HUMAN	Protein AMBP OS=Homo sapiens GN=AMBP PE=1 SV=1	0	99	EDSCQLGYSAGPCMGMTSR	Carbamidomethyl(C)@4; Carbamidomethyl(C)@13; Oxidation(M)@16		0.00239718	2121.82	708.282	2121.82	708.281	3	19
1	110.11	38.64	P02760	AMBP_HUMAN	Protein AMBP OS=Homo sapiens GN=AMBP PE=1 SV=1	0	99	EDSCQLGYSAGPCMGMTSR	Carbamidomethyl(C)@4; Carbamidomethyl(C)@13; Oxidation(M)@16		0.00148167	2121.82	708.282	2121.82	708.281	3	18
1	110.11	38.64	P02760	AMBP_HUMAN	Protein AMBP OS=Homo sapiens GN=AMBP PE=1 SV=1	0	99	EDSCQLGYSAGPCMGMTSR	Carbamidomethyl(C)@4; Carbamidomethyl(C)@13; Oxidation(M)@14		0.00166477	2121.82	708.282	2121.82	708.281	3	20
1	110.11	38.64	P02760	AMBP_HUMAN	Protein AMBP OS=Homo sapiens GN=AMBP PE=1 SV=1	0	99	EDSCQLGYSAGPCMGMTSR	Carbamidomethyl(C)@4; Carbamidomethyl(C)@13; Oxidation(M)@14		0.00148167	2121.82	708.282	2121.82	708.281	3	18
1	110.11	38.64	P02760	AMBP_HUMAN	Protein AMBP OS=Homo sapiens GN=AMBP PE=1 SV=1	0	99	EDSCQLGYSAGPCMGMTSR	Carbamidomethyl(C)@4; Carbamidomethyl(C)@13; Oxidation(M)@14		0.00239718	2121.82	708.282	2121.82	708.281	3	22
1	110.11	38.64	P02760	AMBP_HUMAN	Protein AMBP OS=Homo sapiens GN=AMBP PE=1 SV=1	0	99	EDSCQLGYSAGPCMGMTSR	Carbamidomethyl(C)@4; Carbamidomethyl(C)@13; Oxidation(M)@14		0.00239718	2121.82	708.282	2121.82	708.281	3	20
1	110.11	38.64	P02760	AMBP_HUMAN	Protein AMBP OS=Homo sapiens GN=AMBP PE=1 SV=1	0	99	EDSCQLGYSAGPCMGMTSR	Carbamidomethyl(C)@4; Carbamidomethyl(C)@13		-2.01782	2103.81	702.277	2105.83	702.95	3	15
1	110.11	38.64	P02760	AMBP_HUMAN	Protein AMBP OS=Homo sapiens GN=AMBP PE=1 SV=1	0	99	EDSCQLGYSAGPCMGMTSR	Carbamidomethyl(C)@4; Carbamidomethyl(C)@13; Oxidation(M)@16		0.00203098	2121.82	708.282	2121.82	708.281	3	22
1	110.11	38.64	P02760	AMBP_HUMAN	Protein AMBP OS=Homo sapiens GN=AMBP PE=1 SV=1	0	99	EDSCQLGYSAGPCMGMTSR	Carbamidomethyl(C)@4; Carbamidomethyl(C)@13		-2.01782	2103.81	702.277	2105.83	702.95	3	17
1	110.11	38.64	P02760	AMBP_HUMAN	Protein AMBP OS=Homo sapiens GN=AMBP PE=1 SV=1	0	99	EDSCQLGYSAGPCMGMTSR	Carbamidomethyl(C)@4; Carbamidomethyl(C)@13; Oxidation(M)@14		0.00496062	2121.83	708.283	2121.82	708.281	3	18
1	110.11	38.64	P02760	AMBP_HUMAN	Protein AMBP OS=Homo sapiens GN=AMBP PE=1 SV=1	0	99	EDSCQLGYSAGPCMGMTSR	Carbamidomethyl(C)@4; Carbamidomethyl(C)@13		0.00711478	2105.83	702.952	2105.83	702.95	3	22
1	110.11	38.64	P02760	AMBP_HUMAN	Protein AMBP OS=Homo sapiens GN=AMBP PE=1 SV=1	0	99	EDSCQLGYSAGPCMGMTSR	Cation:Na(E)@1; Carbamidomethyl(C)@4; Carbamidomethyl(C)@13		0.000819109	2127.81	710.277	2127.81	710.277	3	16
1	110.11	38.64	P02760	AMBP_HUMAN	Protein AMBP OS=Homo sapiens GN=AMBP PE=1 SV=1	0	99	EDSCQLGYSAGPCMGMTSR	Carbamidomethyl(C)@4; Carbamidomethyl(C)@13; Oxidation(M)@14		0.00203098	2121.82	708.282	2121.82	708.281	3	20
1	110.11	38.64	P02760	AMBP_HUMAN	Protein AMBP OS=Homo sapiens GN=AMBP PE=1 SV=1	0	99	EDSCQLGYSAGPCMGMTSR	Carbamidomethyl(C)@4; Carbamidomethyl(C)@13		0.00711478	2105.83	702.952	2105.83	702.95	3	24
1	110.11	38.64	P02760	AMBP_HUMAN	Protein AMBP OS=Homo sapiens GN=AMBP PE=1 SV=1	0	99	EDSCQLGYSAGPCMGMTSR	Cation:Na(E)@1; Carbamidomethyl(C)@4; Carbamidomethyl(C)@13		0.000819109	2127.81	710.277	2127.81	710.277	3	16
1	110.11	38.64	P02760	AMBP_HUMAN	Protein AMBP OS=Homo sapiens GN=AMBP PE=1 SV=1	0	99	EDSCQLGYSAGPCMGMTSR	Carbamidomethyl(C)@4; Carbamidomethyl(C)@13		0.00711478	2105.83	702.952	2105.83	702.95	3	20
1	110.11	38.64	P02760	AMBP_HUMAN	Protein AMBP OS=Homo sapiens GN=AMBP PE=1 SV=1	0	99	EDSCQLGYSAGPCMGMTSR	Propionamide@N-term; No Carbamidomethyl(C)@4; Carbamidomethyl(C)@13		0.00286828	2119.85	707.623	2119.84	707.622	3	20
1	110.11	38.64	P02760	AMBP_HUMAN	Protein AMBP OS=Homo sapiens GN=AMBP PE=1 SV=1	0	99	EDSCQLGYSAGPCMGMTSR	Glu->pyro-Glu@N-term; Carbamidomethyl(C)@4; Carbamidomethyl(C)@13; Oxidation(M)@14		0.00350552	2103.82	702.279	2103.81	702.278	3	22
1	110.11	38.64	P02760	AMBP_HUMAN	Protein AMBP OS=Homo sapiens GN=AMBP PE=1 SV=1	0	99	EDSCQLGYSAGPCMGMTSR	Propionamide@N-term; No Carbamidomethyl(C)@4; Carbamidomethyl(C)@13; Oxidation(M)@14; Oxidation(M)@16		0.00163003	2151.83	718.285	2151.83	718.285	3	21
1	110.11	38.64	P02760	AMBP_HUMAN	Protein AMBP OS=Homo sapiens GN=AMBP PE=1 SV=1	0	99	EDSCQLGYSAGPCMGMTSR	Carbamidomethyl(C)@4; Pro->pyro-Glu(P)@12; Carbamidomethyl(C)@13		-0.000342143	2119.81	707.609	2119.81	707.609	3	19
1	110.11	38.64	P02760	AMBP_HUMAN	Protein AMBP OS=Homo sapiens GN=AMBP PE=1 SV=1	0	99	EDSCQLGYSAGPCMGMTSR	Carbamidomethyl(C)@4; Carbamidomethyl(C)@13; Oxidation(M)@14; Oxidation(M)@16		0.0123446	2137.83	713.617	2137.82	713.613	3	19
1	110.11	38.64	P02760	AMBP_HUMAN	Protein AMBP OS=Homo sapiens GN=AMBP PE=1 SV=1	0	99	EDSCQLGYSAGPCMGMTSR	Carbamidomethyl(C)@4; Deamidated(Q)@5; Carbamidomethyl(C)@13; Oxidation(M)@14; Oxidation(M)@16		0.0177047	2138.82	713.947	2138.8	713.941	3	16
1	110.11	38.64	P02760	AMBP_HUMAN	Protein AMBP OS=Homo sapiens GN=AMBP PE=1 SV=1	0	99	EDSCQLGYSAGPCMGMTSR	Propionamide@N-term; No Carbamidomethyl(C)@4; Carbamidomethyl(C)@13		-0.000280011	2119.84	707.622	2119.84	707.622	3	21
1	110.11	38.64	P02760	AMBP_HUMAN	Protein AMBP OS=Homo sapiens GN=AMBP PE=1 SV=1	0	99	EDSCQLGYSAGPCMGMTSR	Carbamidomethyl(C)@4; Carbamidomethyl(C)@13; Oxidation(M)@14; Oxidation(M)@16		-0.00103943	2137.82	713.613	2137.82	713.613	3	17
1	110.11	38.64	P02760	AMBP_HUMAN	Protein AMBP OS=Homo sapiens GN=AMBP PE=1 SV=1	0	99	EDSCQLGYSAGPCMGMTSR	Propionamide@N-term; No Carbamidomethyl(C)@4; Carbamidomethyl(C)@13; Oxidation(M)@14; Oxidation(M)@16		-0.00313265	2151.83	718.284	2151.83	718.285	3	19
1	110.11	38.64	P02760	AMBP_HUMAN	Protein AMBP OS=Homo sapiens GN=AMBP PE=1 SV=1	0	99	EDSCQLGYSAGPCMGMTSR	Cation:Na(E)@1; Carbamidomethyl(C)@4; Carbamidomethyl(C)@13; Oxidation(M)@14; Oxidation(M)@16		-0.00123432	2159.8	720.94	2159.8	720.94	3	13
1	110.11	38.64	P02760	AMBP_HUMAN	Protein AMBP OS=Homo sapiens GN=AMBP PE=1 SV=1	0	99	EDSCQLGYSAGPCMGMTSR	Carbamidomethyl(C)@4; Pro->pyro-Glu(P)@12; Carbamidomethyl(C)@13; Oxidation(M)@16		0.00781606	2135.81	712.944	2135.8	712.941	3	18
1	110.11	38.64	P02760	AMBP_HUMAN	Protein AMBP OS=Homo sapiens GN=AMBP PE=1 SV=1	0	99	EDSCQLGYSAGPCMGMTSR	Carbamidomethyl(C)@4; Pro->pyro-Glu(P)@12; Carbamidomethyl(C)@13; Oxidation(M)@14; Oxidation(M)@16		0.0395659	2151.84	718.286	2151.8	718.273	3	14
1	110.11	38.64	P02760	AMBP_HUMAN	Protein AMBP OS=Homo sapiens GN=AMBP PE=1 SV=1	0	99	EDSCQLGYSAGPCMGMTSR	Propionamide@N-term; No Carbamidomethyl(C)@4; Carbamidomethyl(C)@13; Oxidation(M)@14; Oxidation(M)@16		-0.00103101	2151.83	718.285	2151.83	718.285	3	20
1	110.11	38.64	P02760	AMBP_HUMAN	Protein AMBP OS=Homo sapiens GN=AMBP PE=1 SV=1	0	99	EDSCQLGYSAGPCMGMTSR	Carbamidomethyl(C)@4; Carbamidomethyl(C)@13; Oxidation(M)@14; Dioxidation(M)@16		0.004544	2153.82	718.946	2153.81	718.945	3	21
1	110.11	38.64	P02760	AMBP_HUMAN	Protein AMBP OS=Homo sapiens GN=AMBP PE=1 SV=1	0	99	EDSCQLGYSAGPCMGMTSR	Carbamidomethyl(C)@4; Carbamidomethyl(C)@13; Dioxidation(M)@14; Oxidation(M)@16		-0.00534358	2153.81	718.943	2153.81	718.945	3	21
1	110.11	38.64	P02760	AMBP_HUMAN	Protein AMBP OS=Homo sapiens GN=AMBP PE=1 SV=1	0	99	EDSCQLGYSAGPCMGMTSR	Carbamidomethyl(C)@4; Carbamidomethyl(C)@13; Oxidation(M)@16		0.00166477	2121.82	708.282	2121.82	708.281	3	17
1	110.11	38.64	P02760	AMBP_HUMAN	Protein AMBP OS=Homo sapiens GN=AMBP PE=1 SV=1	0	99	EDSCQLGYSAGPCMGMTSR	Carbamidomethyl(C)@4; Carbamidomethyl(C)@13; Oxidation(M)@14; Oxidation(M)@16		-0.013941	2137.8	1069.91	2137.82	1069.92	2	16
1	110.11	38.64	P02760	AMBP_HUMAN	Protein AMBP OS=Homo sapiens GN=AMBP PE=1 SV=1	0	99	EDSCQLGYSAGPCMGMTSR	Carbamidomethyl(C)@4; Carbamidomethyl(C)@13; Oxidation(M)@14; Oxidation(M)@16		-0.0054339	2137.81	713.611	2137.82	713.613	3	16
1	110.11	38.64	P02760	AMBP_HUMAN	Protein AMBP OS=Homo sapiens GN=AMBP PE=1 SV=1	0	99	EDSCQLGYSAGPCMGMTSR	Glu->pyro-Glu@N-term; Carbamidomethyl(C)@4; No Carbamidomethyl(C)@13; Oxidation(M)@16		0.0188136	2046.81	683.277	2046.79	683.271	3	12
1	110.11	38.64	P02760	AMBP_HUMAN	Protein AMBP OS=Homo sapiens GN=AMBP PE=1 SV=1	0	99	EYCGVPGDGDE	Carbamidomethyl(C)@3	cleaved E-E@C-term	-0.00105435	1196.43	599.221	1196.43	599.222	2	10
1	110.11	38.64	P02760	AMBP_HUMAN	Protein AMBP OS=Homo sapiens GN=AMBP PE=1 SV=1	0	99	EYCGVPGDGDEE	Carbamidomethyl(C)@3	cleaved E-L@C-term	-0.00175664	1325.47	663.742	1325.47	663.743	2	11
1	110.11	38.64	P02760	AMBP_HUMAN	Protein AMBP OS=Homo sapiens GN=AMBP PE=1 SV=1	0	99	EYCGVPGDGDEE	Carbamidomethyl(C)@3	cleaved E-L@C-term	-0.00175664	1325.47	663.742	1325.47	663.743	2	16
1	110.11	38.64	P02760	AMBP_HUMAN	Protein AMBP OS=Homo sapiens GN=AMBP PE=1 SV=1	0	99	EYCGVPGDGDEE	Carbamidomethyl(C)@3	cleaved E-L@C-term	-0.0039687	1325.47	663.741	1325.47	663.743	2	11
1	110.11	38.64	P02760	AMBP_HUMAN	Protein AMBP OS=Homo sapiens GN=AMBP PE=1 SV=1	0	99	EYCGVPGDGDEE	Carbamidomethyl(C)@3	cleaved E-L@C-term	0.00628545	1325.48	663.746	1325.47	663.743	2	11
1	110.11	38.64	P02760	AMBP_HUMAN	Protein AMBP OS=Homo sapiens GN=AMBP PE=1 SV=1	0	99	EYCGVPGDGDEE	Carbamidomethyl(C)@3	cleaved E-L@C-term	-0.00267208	1325.47	663.742	1325.47	663.743	2	14
1	110.11	38.64	P02760	AMBP_HUMAN	Protein AMBP OS=Homo sapiens GN=AMBP PE=1 SV=1	0	99	EYCGVPGDGDEE	Carbamidomethyl(C)@3	cleaved E-L@C-term	-0.00267208	1325.47	663.742	1325.47	663.743	2	13
1	110.11	38.64	P02760	AMBP_HUMAN	Protein AMBP OS=Homo sapiens GN=AMBP PE=1 SV=1	0	99	EYCGVPGDGDEEL	Carbamidomethyl(C)@3; Cation:Na(E)@12	cleaved L-L@C-term	-3.73093e-05	1460.54	731.276	1460.54	731.276	2	12
1	110.11	38.64	P02760	AMBP_HUMAN	Protein AMBP OS=Homo sapiens GN=AMBP PE=1 SV=1	0	99	EYCGVPGDGDEEL	Carbamidomethyl(C)@3	cleaved L-L@C-term	-0.000573889	1438.56	720.285	1438.56	720.285	2	16
1	110.11	38.64	P02760	AMBP_HUMAN	Protein AMBP OS=Homo sapiens GN=AMBP PE=1 SV=1	0	99	EYCGVPGDGDEEL	Carbamidomethyl(C)@3; Cation:Na(E)@11	cleaved L-L@C-term	-0.000403515	1460.54	731.276	1460.54	731.276	2	17
1	110.11	38.64	P02760	AMBP_HUMAN	Protein AMBP OS=Homo sapiens GN=AMBP PE=1 SV=1	0	99	EYCGVPGDGDEEL	Carbamidomethyl(C)@3	cleaved L-L@C-term	-0.000573889	1438.56	720.285	1438.56	720.285	2	17
1	110.11	38.64	P02760	AMBP_HUMAN	Protein AMBP OS=Homo sapiens GN=AMBP PE=1 SV=1	0	99	EYCGVPGDGDEEL	Carbamidomethyl(C)@3	cleaved L-L@C-term	0.00186748	1438.56	720.286	1438.56	720.285	2	12
1	110.11	38.64	P02760	AMBP_HUMAN	Protein AMBP OS=Homo sapiens GN=AMBP PE=1 SV=1	0	99	EYCGVPGDGDEEL	Carbamidomethyl(C)@3	cleaved L-L@C-term	0.0008948	1438.56	720.286	1438.56	720.285	2	8
1	110.11	38.64	P02760	AMBP_HUMAN	Protein AMBP OS=Homo sapiens GN=AMBP PE=1 SV=1	0	99	EYCGVPGDGDEEL	Carbamidomethyl(C)@3	cleaved L-L@C-term	0.00443471	1438.56	720.287	1438.56	720.285	2	13
1	110.11	38.64	P02760	AMBP_HUMAN	Protein AMBP OS=Homo sapiens GN=AMBP PE=1 SV=1	0	99	EYCGVPGDGDEEL	Carbamidomethyl(C)@3	cleaved L-L@C-term	0.000518343	1438.56	720.285	1438.56	720.285	2	8
1	110.11	38.64	P02760	AMBP_HUMAN	Protein AMBP OS=Homo sapiens GN=AMBP PE=1 SV=1	0	99	EYCGVPGDGDEEL	Carbamidomethyl(C)@3	cleaved L-L@C-term	-0.00139067	1438.55	720.284	1438.56	720.285	2	10
1	110.11	38.64	P02760	AMBP_HUMAN	Protein AMBP OS=Homo sapiens GN=AMBP PE=1 SV=1	0	99	EYCGVPGDGDEEL	Carbamidomethyl(C)@3; Cation:Na(E)@11	cleaved L-L@C-term	-0.00105529	1460.54	731.276	1460.54	731.276	2	15
1	110.11	38.64	P02760	AMBP_HUMAN	Protein AMBP OS=Homo sapiens GN=AMBP PE=1 SV=1	0	99	EYCGVPGDGDEEL	Carbamidomethyl(C)@3	cleaved L-L@C-term	0.00153898	1438.56	720.286	1438.56	720.285	2	16
1	110.11	38.64	P02760	AMBP_HUMAN	Protein AMBP OS=Homo sapiens GN=AMBP PE=1 SV=1	0	99	EYCGVPGDGDEEL	Carbamidomethyl(C)@3	cleaved L-L@C-term	-0.00139067	1438.55	720.284	1438.56	720.285	2	12
1	110.11	38.64	P02760	AMBP_HUMAN	Protein AMBP OS=Homo sapiens GN=AMBP PE=1 SV=1	0	99	EYCGVPGDGDEEL	Carbamidomethyl(C)@3	cleaved L-L@C-term	0.00190519	1438.56	720.286	1438.56	720.285	2	9
1	110.11	38.64	P02760	AMBP_HUMAN	Protein AMBP OS=Homo sapiens GN=AMBP PE=1 SV=1	0	99	EYCGVPGDGDEELL	Carbamidomethyl(C)@3; Cation:Na(E)@11	cleaved L-R@C-term	0.00071552	1573.62	787.818	1573.62	787.818	2	16
1	110.11	38.64	P02760	AMBP_HUMAN	Protein AMBP OS=Homo sapiens GN=AMBP PE=1 SV=1	0	99	EYCGVPGDGDEELL	Carbamidomethyl(C)@3	cleaved L-R@C-term	0.00116527	1551.64	776.828	1551.64	776.827	2	17
1	110.11	38.64	P02760	AMBP_HUMAN	Protein AMBP OS=Homo sapiens GN=AMBP PE=1 SV=1	0	99	EYCGVPGDGDEELL	Carbamidomethyl(C)@3; Cation:Na(E)@11	cleaved L-R@C-term	0.00071552	1573.62	787.818	1573.62	787.818	2	16
1	110.11	38.64	P02760	AMBP_HUMAN	Protein AMBP OS=Homo sapiens GN=AMBP PE=1 SV=1	0	99	EYCGVPGDGDEELL	Carbamidomethyl(C)@3	cleaved L-R@C-term	0.00116527	1551.64	776.828	1551.64	776.827	2	16
1	110.11	38.64	P02760	AMBP_HUMAN	Protein AMBP OS=Homo sapiens GN=AMBP PE=1 SV=1	0	99	EYCGVPGDGDEELL	Carbamidomethyl(C)@3; Cation:Na(E)@11	cleaved L-R@C-term	0.00071552	1573.62	787.818	1573.62	787.818	2	17
1	110.11	38.64	P02760	AMBP_HUMAN	Protein AMBP OS=Homo sapiens GN=AMBP PE=1 SV=1	0	99	EYCGVPGDGDEELL	Carbamidomethyl(C)@3	cleaved L-R@C-term	0.000921131	1551.64	776.828	1551.64	776.827	2	15
1	110.11	38.64	P02760	AMBP_HUMAN	Protein AMBP OS=Homo sapiens GN=AMBP PE=1 SV=1	0	99	EYCGVPGDGDEELL	Carbamidomethyl(C)@3	cleaved L-R@C-term	0.000799062	1551.64	776.828	1551.64	776.827	2	15
1	110.11	38.64	P02760	AMBP_HUMAN	Protein AMBP OS=Homo sapiens GN=AMBP PE=1 SV=1	0	99	EYCGVPGDGDEELL	Carbamidomethyl(C)@3	cleaved L-R@C-term	0.000799062	1551.64	776.828	1551.64	776.827	2	13
1	110.11	38.64	P02760	AMBP_HUMAN	Protein AMBP OS=Homo sapiens GN=AMBP PE=1 SV=1	0	99	EYCGVPGDGDEELL	Carbamidomethyl(C)@3	cleaved L-R@C-term	0.00124936	1551.64	776.828	1551.64	776.827	2	11
1	110.11	38.64	P02760	AMBP_HUMAN	Protein AMBP OS=Homo sapiens GN=AMBP PE=1 SV=1	0	99	EYCGVPGDGDEELL	Carbamidomethyl(C)@3	cleaved L-R@C-term	0.00100523	1551.64	776.828	1551.64	776.827	2	16
1	110.11	38.64	P02760	AMBP_HUMAN	Protein AMBP OS=Homo sapiens GN=AMBP PE=1 SV=1	0	99	EYCGVPGDGDEELL	Carbamidomethyl(C)@3	cleaved L-R@C-term	0.00100523	1551.64	776.828	1551.64	776.827	2	13
1	110.11	38.64	P02760	AMBP_HUMAN	Protein AMBP OS=Homo sapiens GN=AMBP PE=1 SV=1	0	99	EYCGVPGDGDEELL	Carbamidomethyl(C)@3	cleaved L-R@C-term	-0.00114288	1551.64	776.827	1551.64	776.827	2	10
1	110.11	38.64	P02760	AMBP_HUMAN	Protein AMBP OS=Homo sapiens GN=AMBP PE=1 SV=1	0	99	EYCGVPGDGDEELL	Carbamidomethyl(C)@3	cleaved L-R@C-term	0.000325354	1551.64	776.827	1551.64	776.827	2	14
1	110.11	38.64	P02760	AMBP_HUMAN	Protein AMBP OS=Homo sapiens GN=AMBP PE=1 SV=1	0	99	EYCGVPGDGDEELL	Carbamidomethyl(C)@3; Cation:Na(E)@11	cleaved L-R@C-term	4.06634e-05	1573.62	787.818	1573.62	787.818	2	16
1	110.11	38.64	P02760	AMBP_HUMAN	Protein AMBP OS=Homo sapiens GN=AMBP PE=1 SV=1	0	99	EYCGVPGDGDEELL	Carbamidomethyl(C)@3	cleaved L-R@C-term	-4.08522e-05	1551.64	776.827	1551.64	776.827	2	16
1	110.11	38.64	P02760	AMBP_HUMAN	Protein AMBP OS=Homo sapiens GN=AMBP PE=1 SV=1	0	99	EYCGVPGDGDEELL	Carbamidomethyl(C)@3; Cation:Na(E)@11	cleaved L-R@C-term	0.000528939	1573.62	787.818	1573.62	787.818	2	17
1	110.11	38.64	P02760	AMBP_HUMAN	Protein AMBP OS=Homo sapiens GN=AMBP PE=1 SV=1	0	99	EYCGVPGDGDEELL	Carbamidomethyl(C)@3	cleaved L-R@C-term	0.000569492	1551.64	776.827	1551.64	776.827	2	14
1	110.11	38.64	P02760	AMBP_HUMAN	Protein AMBP OS=Homo sapiens GN=AMBP PE=1 SV=1	0	99	EYCGVPGDGDEELLR	Carbamidomethyl(C)@3		-0.000753178	1707.74	854.877	1707.74	854.878	2	15
1	110.11	38.64	P02760	AMBP_HUMAN	Protein AMBP OS=Homo sapiens GN=AMBP PE=1 SV=1	0	99	EYCGVPGDGDEELLR	Carbamidomethyl(C)@3		0.0049385	1707.75	570.256	1707.74	570.254	3	22
1	110.11	38.64	P02760	AMBP_HUMAN	Protein AMBP OS=Homo sapiens GN=AMBP PE=1 SV=1	0	99	EYCGVPGDGDEELLR	Carbamidomethyl(C)@3		-2.13718e-05	1707.74	854.878	1707.74	854.878	2	18
1	110.11	38.64	P02760	AMBP_HUMAN	Protein AMBP OS=Homo sapiens GN=AMBP PE=1 SV=1	0	99	EYCGVPGDGDEELLR	Carbamidomethyl(C)@3		-0.000387579	1707.74	854.878	1707.74	854.878	2	16
1	110.11	38.64	P02760	AMBP_HUMAN	Protein AMBP OS=Homo sapiens GN=AMBP PE=1 SV=1	0	99	EYCGVPGDGDEELLR	Carbamidomethyl(C)@3		0.000222767	1707.74	854.878	1707.74	854.878	2	14
1	110.11	38.64	P02760	AMBP_HUMAN	Protein AMBP OS=Homo sapiens GN=AMBP PE=1 SV=1	0	99	EYCGVPGDGDEELLR	Carbamidomethyl(C)@3		-0.00140315	1707.74	854.877	1707.74	854.878	2	15
1	110.11	38.64	P02760	AMBP_HUMAN	Protein AMBP OS=Homo sapiens GN=AMBP PE=1 SV=1	0	99	EYCGVPGDGDEELLR	Carbamidomethyl(C)@3		0.00177066	1707.74	854.879	1707.74	854.878	2	15
1	110.11	38.64	P02760	AMBP_HUMAN	Protein AMBP OS=Homo sapiens GN=AMBP PE=1 SV=1	0	99	EYCGVPGDGDEELLR	Propionamide@N-term; No Carbamidomethyl(C)@3		0.000836766	1721.76	861.886	1721.76	861.886	2	14
1	110.11	38.64	P02760	AMBP_HUMAN	Protein AMBP OS=Homo sapiens GN=AMBP PE=1 SV=1	0	99	EYCGVPGDGDEELLR	Propionamide@N-term; No Carbamidomethyl(C)@3		-0.00355775	1721.75	861.884	1721.76	861.886	2	13
1	110.11	38.64	P02760	AMBP_HUMAN	Protein AMBP OS=Homo sapiens GN=AMBP PE=1 SV=1	0	99	EYCGVPGDGDEELLR	Carbamidomethyl(C)@3		-9.03262	1698.71	850.361	1707.74	854.878	2	11
1	110.11	38.64	P02760	AMBP_HUMAN	Protein AMBP OS=Homo sapiens GN=AMBP PE=1 SV=1	0	99	EYCGVPGDGDEELLR	Propionamide@N-term; No Carbamidomethyl(C)@3		-0.00254192	1721.75	861.884	1721.76	861.886	2	13
1	110.11	38.64	P02760	AMBP_HUMAN	Protein AMBP OS=Homo sapiens GN=AMBP PE=1 SV=1	0	99	EYCGVPGDGDEELLR	Carbamidomethyl(C)@3		-9.03619	1698.7	850.36	1707.74	854.878	2	13
1	110.11	38.64	P02760	AMBP_HUMAN	Protein AMBP OS=Homo sapiens GN=AMBP PE=1 SV=1	0	99	EYCGVPGDGDEELLR	Carbamidomethyl(C)@3		0.00305527	1707.74	854.879	1707.74	854.878	2	19
1	110.11	38.64	P02760	AMBP_HUMAN	Protein AMBP OS=Homo sapiens GN=AMBP PE=1 SV=1	0	99	EYCGVPGDGDEELLR	Carbamidomethyl(C)@3		0.00305527	1707.74	854.879	1707.74	854.878	2	20
1	110.11	38.64	P02760	AMBP_HUMAN	Protein AMBP OS=Homo sapiens GN=AMBP PE=1 SV=1	0	99	EYCGVPGDGDEELLR	Carbamidomethyl(C)@3		0.0029332	1707.74	854.879	1707.74	854.878	2	17
1	110.11	38.64	P02760	AMBP_HUMAN	Protein AMBP OS=Homo sapiens GN=AMBP PE=1 SV=1	0	99	EYCGVPGDGDEELLR	Glu->pyro-Glu@N-term; Carbamidomethyl(C)@3		-8.6389e-05	1689.73	845.872	1689.73	845.872	2	13
1	110.11	38.64	P02760	AMBP_HUMAN	Protein AMBP OS=Homo sapiens GN=AMBP PE=1 SV=1	0	99	EYCGVPGDGDEELLR	Carbamidomethyl(C)@3		0.000733391	1707.74	854.878	1707.74	854.878	2	15
1	110.11	38.64	P02760	AMBP_HUMAN	Protein AMBP OS=Homo sapiens GN=AMBP PE=1 SV=1	0	99	EYCGVPGDGDEELLR	Carbamidomethyl(C)@3		0.000123043	1707.74	854.878	1707.74	854.878	2	17
1	110.11	38.64	P02760	AMBP_HUMAN	Protein AMBP OS=Homo sapiens GN=AMBP PE=1 SV=1	0	99	EYCGVPGDGDEELLR	Carbamidomethyl(C)@3; Cation:Na(D)@8		-0.00121197	1729.72	577.581	1729.72	577.582	3	14
1	110.11	38.64	P02760	AMBP_HUMAN	Protein AMBP OS=Homo sapiens GN=AMBP PE=1 SV=1	0	99	EYCGVPGDGDEELLR	Carbamidomethyl(C)@3		-0.00231835	1707.74	854.877	1707.74	854.878	2	15
1	110.11	38.64	P02760	AMBP_HUMAN	Protein AMBP OS=Homo sapiens GN=AMBP PE=1 SV=1	0	99	EYCGVPGDGDEELLR	Carbamidomethyl(C)@3		-0.0029287	1707.74	854.876	1707.74	854.878	2	15
1	110.11	38.64	P02760	AMBP_HUMAN	Protein AMBP OS=Homo sapiens GN=AMBP PE=1 SV=1	0	99	EYCGVPGDGDEELLR	Carbamidomethyl(C)@3; Oxidation(P)@6		-0.00656441	1723.73	862.872	1723.74	862.875	2	12
1	110.11	38.64	P02760	AMBP_HUMAN	Protein AMBP OS=Homo sapiens GN=AMBP PE=1 SV=1	0	99	EYCGVPGDGDEELLR	No Carbamidomethyl(C)@3		0.0174889	1650.74	826.376	1650.72	826.367	2	12
1	110.11	38.64	P02760	AMBP_HUMAN	Protein AMBP OS=Homo sapiens GN=AMBP PE=1 SV=1	0	99	EYCGVPGDGDEELLR	Glu->pyro-Glu@N-term; No Carbamidomethyl(C)@3		0.0157449	1632.72	817.37	1632.71	817.362	2	12
1	110.11	38.64	P02760	AMBP_HUMAN	Protein AMBP OS=Homo sapiens GN=AMBP PE=1 SV=1	0	99	EYCGVPGDGDEELLR	Carbamidomethyl(C)@3; Oxidation(P)@6		-0.00302443	1723.73	862.874	1723.74	862.875	2	11
1	110.11	38.64	P02760	AMBP_HUMAN	Protein AMBP OS=Homo sapiens GN=AMBP PE=1 SV=1	0	99	EYCGVPGDGDEELLR	No Carbamidomethyl(C)@3		0.0174889	1650.74	826.376	1650.72	826.367	2	12
1	110.11	38.64	P02760	AMBP_HUMAN	Protein AMBP OS=Homo sapiens GN=AMBP PE=1 SV=1	0	99	EYCGVPGDGDEELLR	Glu->pyro-Glu@N-term; No Carbamidomethyl(C)@3		0.0242078	1632.73	545.252	1632.71	545.244	3	17
1	110.11	38.64	P02760	AMBP_HUMAN	Protein AMBP OS=Homo sapiens GN=AMBP PE=1 SV=1	0	99	EYCGVPGDGDEELLR	Carbamidomethyl(C)@3; Oxidation(P)@6		-0.00278029	1723.73	862.874	1723.74	862.875	2	10
1	110.11	38.64	P02760	AMBP_HUMAN	Protein AMBP OS=Homo sapiens GN=AMBP PE=1 SV=1	0	99	EYCGVPGDGDEELLR	No Carbamidomethyl(C)@3		0.0174889	1650.74	826.376	1650.72	826.367	2	13
1	110.11	38.64	P02760	AMBP_HUMAN	Protein AMBP OS=Homo sapiens GN=AMBP PE=1 SV=1	0	99	EYCGVPGDGDEELLR	Glu->pyro-Glu@N-term; No Carbamidomethyl(C)@3		0.0242078	1632.73	545.252	1632.71	545.244	3	13
1	110.11	38.64	P02760	AMBP_HUMAN	Protein AMBP OS=Homo sapiens GN=AMBP PE=1 SV=1	0	99	EYCGVPGDGDEELLR	Carbamidomethyl(C)@3; Oxidation(P)@6		-0.00595407	1723.73	862.872	1723.74	862.875	2	12
1	110.11	38.64	P02760	AMBP_HUMAN	Protein AMBP OS=Homo sapiens GN=AMBP PE=1 SV=1	0	99	EYCGVPGDGDEELLR	No Carbamidomethyl(C)@3		0.0174889	1650.74	826.376	1650.72	826.367	2	12
1	110.11	38.64	P02760	AMBP_HUMAN	Protein AMBP OS=Homo sapiens GN=AMBP PE=1 SV=1	0	99	EYCGVPGDGDEELLR	Carbamidomethyl(C)@3		-2.01858	1705.72	853.869	1707.74	854.878	2	14
1	110.11	38.64	P02760	AMBP_HUMAN	Protein AMBP OS=Homo sapiens GN=AMBP PE=1 SV=1	0	99	EYCGVPGDGDEELLR	Carbamidomethyl(C)@3; Oxidation(P)@6		-0.00302443	1723.73	862.874	1723.74	862.875	2	11
1	110.11	38.64	P02760	AMBP_HUMAN	Protein AMBP OS=Homo sapiens GN=AMBP PE=1 SV=1	0	99	EYCGVPGDGDEELLR	Carbamidomethyl(C)@3		0.00177253	1707.74	854.879	1707.74	854.878	2	20
1	110.11	38.64	P02760	AMBP_HUMAN	Protein AMBP OS=Homo sapiens GN=AMBP PE=1 SV=1	0	99	EYCGVPGDGDEELLR	Carbamidomethyl(C)@3; Cation:Na(D)@8		-0.000540875	1729.72	577.581	1729.72	577.582	3	18
1	110.11	38.64	P02760	AMBP_HUMAN	Protein AMBP OS=Homo sapiens GN=AMBP PE=1 SV=1	0	99	EYCGVPGDGDEELLR	Cation:K(E)@1; Carbamidomethyl(C)@3		0.000541521	1745.7	582.906	1745.7	582.906	3	13
1	110.11	38.64	P02760	AMBP_HUMAN	Protein AMBP OS=Homo sapiens GN=AMBP PE=1 SV=1	0	99	EYCGVPGDGDEELLR	Carbamidomethyl(C)@3; Oxidation(P)@6		0.00124797	1723.74	862.876	1723.74	862.875	2	11
1	110.11	38.64	P02760	AMBP_HUMAN	Protein AMBP OS=Homo sapiens GN=AMBP PE=1 SV=1	0	99	EYCGVPGDGDEELLR	Carbamidomethyl(C)@3		0.00152839	1707.74	854.879	1707.74	854.878	2	21
1	110.11	38.64	P02760	AMBP_HUMAN	Protein AMBP OS=Homo sapiens GN=AMBP PE=1 SV=1	0	99	EYCGVPGDGDEELLR	Carbamidomethyl(C)@3; Cation:Na(D)@8		-0.000540875	1729.72	577.581	1729.72	577.582	3	20
1	110.11	38.64	P02760	AMBP_HUMAN	Protein AMBP OS=Homo sapiens GN=AMBP PE=1 SV=1	0	99	EYCGVPGDGDEELLR	Carbamidomethyl(C)@3; Cation:K(D)@8		-0.00238813	1745.69	582.905	1745.7	582.906	3	17
1	110.11	38.64	P02760	AMBP_HUMAN	Protein AMBP OS=Homo sapiens GN=AMBP PE=1 SV=1	0	99	EYCGVPGDGDEELLR	Carbamidomethyl(C)@3; Cation:K(D)@8		-0.000305028	1745.7	437.431	1745.7	437.431	4	13
1	110.11	38.64	P02760	AMBP_HUMAN	Protein AMBP OS=Homo sapiens GN=AMBP PE=1 SV=1	0	99	EYCGVPGDGDEELLR	Carbamidomethyl(C)@3		0.00152839	1707.74	854.879	1707.74	854.878	2	21
1	110.11	38.64	P02760	AMBP_HUMAN	Protein AMBP OS=Homo sapiens GN=AMBP PE=1 SV=1	0	99	EYCGVPGDGDEELLR	Carbamidomethyl(C)@3; Cation:Na(D)@8		-0.000540875	1729.72	577.581	1729.72	577.582	3	19
1	110.11	38.64	P02760	AMBP_HUMAN	Protein AMBP OS=Homo sapiens GN=AMBP PE=1 SV=1	0	99	EYCGVPGDGDEELLR	Carbamidomethyl(C)@3; Cation:K(D)@8		-0.00238813	1745.69	582.905	1745.7	582.906	3	16
1	110.11	38.64	P02760	AMBP_HUMAN	Protein AMBP OS=Homo sapiens GN=AMBP PE=1 SV=1	0	99	EYCGVPGDGDEELLR	Propionamide@N-term; No Carbamidomethyl(C)@3		-0.0038328	1721.75	861.884	1721.76	861.886	2	15
1	110.11	38.64	P02760	AMBP_HUMAN	Protein AMBP OS=Homo sapiens GN=AMBP PE=1 SV=1	0	99	EYCGVPGDGDEELLR	Carbamidomethyl(C)@3		0.00140632	1707.74	854.879	1707.74	854.878	2	20
1	110.11	38.64	P02760	AMBP_HUMAN	Protein AMBP OS=Homo sapiens GN=AMBP PE=1 SV=1	0	99	EYCGVPGDGDEELLR	Carbamidomethyl(C)@3; Dehydrated(D)@10		-0.00216525	1689.73	845.871	1689.73	845.872	2	14
1	110.11	38.64	P02760	AMBP_HUMAN	Protein AMBP OS=Homo sapiens GN=AMBP PE=1 SV=1	0	99	EYCGVPGDGDEELLR	Propionamide@N-term; No Carbamidomethyl(C)@3		-0.0038328	1721.75	861.884	1721.76	861.886	2	18
1	110.11	38.64	P02760	AMBP_HUMAN	Protein AMBP OS=Homo sapiens GN=AMBP PE=1 SV=1	0	99	EYCGVPGDGDEELLR	Carbamidomethyl(C)@3; Cation:Na(D)@8		0.00660015	1729.73	577.584	1729.72	577.582	3	18
1	110.11	38.64	P02760	AMBP_HUMAN	Protein AMBP OS=Homo sapiens GN=AMBP PE=1 SV=1	0	99	EYCGVPGDGDEELLR	Carbamidomethyl(C)@3		0.00116219	1707.74	854.878	1707.74	854.878	2	18
1	110.11	38.64	P02760	AMBP_HUMAN	Protein AMBP OS=Homo sapiens GN=AMBP PE=1 SV=1	0	99	EYCGVPGDGDEELLR	Propionamide@N-term; No Carbamidomethyl(C)@3		-0.0038328	1721.75	861.884	1721.76	861.886	2	15
1	110.11	38.64	P02760	AMBP_HUMAN	Protein AMBP OS=Homo sapiens GN=AMBP PE=1 SV=1	0	99	EYCGVPGDGDEELLR	Carbamidomethyl(C)@3; Cation:Na(D)@8		-0.00109018	1729.72	577.581	1729.72	577.582	3	16
1	110.11	38.64	P02760	AMBP_HUMAN	Protein AMBP OS=Homo sapiens GN=AMBP PE=1 SV=1	0	99	EYCGVPGDGDEELLR	Cation:K(E)@1; Carbamidomethyl(C)@3		0.00127393	1745.7	582.907	1745.7	582.906	3	13
1	110.11	38.64	P02760	AMBP_HUMAN	Protein AMBP OS=Homo sapiens GN=AMBP PE=1 SV=1	0	99	EYCGVPGDGDEELLR	Carbamidomethyl(C)@3		0.00140632	1707.74	854.879	1707.74	854.878	2	20
1	110.11	38.64	P02760	AMBP_HUMAN	Protein AMBP OS=Homo sapiens GN=AMBP PE=1 SV=1	0	99	EYCGVPGDGDEELLR	Propionamide@N-term; No Carbamidomethyl(C)@3		-0.000903153	1721.76	861.885	1721.76	861.886	2	13
1	110.11	38.64	P02760	AMBP_HUMAN	Protein AMBP OS=Homo sapiens GN=AMBP PE=1 SV=1	0	99	EYCGVPGDGDEELLR	Carbamidomethyl(C)@3; Cation:Na(D)@8		-0.00109018	1729.72	577.581	1729.72	577.582	3	21
1	110.11	38.64	P02760	AMBP_HUMAN	Protein AMBP OS=Homo sapiens GN=AMBP PE=1 SV=1	0	99	EYCGVPGDGDEELLR	Carbamidomethyl(C)@3		0.00140632	1707.74	854.879	1707.74	854.878	2	18
1	110.11	38.64	P02760	AMBP_HUMAN	Protein AMBP OS=Homo sapiens GN=AMBP PE=1 SV=1	0	99	EYCGVPGDGDEELLR	Propionamide@N-term; No Carbamidomethyl(C)@3		-0.00029281	1721.76	861.885	1721.76	861.886	2	13
1	110.11	38.64	P02760	AMBP_HUMAN	Protein AMBP OS=Homo sapiens GN=AMBP PE=1 SV=1	0	99	EYCGVPGDGDEELLR	Carbamidomethyl(C)@3		-9.03728	1698.7	850.359	1707.74	854.878	2	13
1	110.11	38.64	P02760	AMBP_HUMAN	Protein AMBP OS=Homo sapiens GN=AMBP PE=1 SV=1	0	99	EYCGVPGDGDEELLR	Carbamidomethyl(C)@3		-9.03349	1698.71	850.361	1707.74	854.878	2	11
1	110.11	38.64	P02760	AMBP_HUMAN	Protein AMBP OS=Homo sapiens GN=AMBP PE=1 SV=1	0	99	EYCGVPGDGDEELLR	Glu->pyro-Glu@N-term; Carbamidomethyl(C)@3; Cation:Na(D)@8		0.000548189	1711.71	856.864	1711.71	856.863	2	14
1	110.11	38.64	P02760	AMBP_HUMAN	Protein AMBP OS=Homo sapiens GN=AMBP PE=1 SV=1	0	99	EYCGVPGDGDEELLR	Glu->pyro-Glu@N-term; Carbamidomethyl(C)@3; Cation:Na(D)@8		0.000548189	1711.71	856.864	1711.71	856.863	2	13
1	110.11	38.64	P02760	AMBP_HUMAN	Protein AMBP OS=Homo sapiens GN=AMBP PE=1 SV=1	0	99	EYCGVPGDGDEELLR	No Carbamidomethyl(C)@3		0.0148046	1650.73	826.375	1650.72	826.367	2	11
1	110.11	38.64	P02760	AMBP_HUMAN	Protein AMBP OS=Homo sapiens GN=AMBP PE=1 SV=1	0	99	EYCGVPGDGDEELLR	Carbamidomethyl(C)@3		0.00494099	1707.75	570.256	1707.74	570.254	3	17
1	110.11	38.64	P02760	AMBP_HUMAN	Protein AMBP OS=Homo sapiens GN=AMBP PE=1 SV=1	0	99	EYCGVPGDGDEELLR	Carbamidomethyl(C)@3		-2.01334	1705.73	853.871	1707.74	854.878	2	14
1	110.11	38.64	P02760	AMBP_HUMAN	Protein AMBP OS=Homo sapiens GN=AMBP PE=1 SV=1	0	99	EYCGVPGDGDEELLR	Carbamidomethyl(C)@3		0.00188191	1707.74	854.879	1707.74	854.878	2	17
1	110.11	38.64	P02760	AMBP_HUMAN	Protein AMBP OS=Homo sapiens GN=AMBP PE=1 SV=1	0	99	EYCGVPGDGDEELLR	Propionamide@N-term; No Carbamidomethyl(C)@3		0.00133961	1721.76	861.886	1721.76	861.886	2	13
1	110.11	38.64	P02760	AMBP_HUMAN	Protein AMBP OS=Homo sapiens GN=AMBP PE=1 SV=1	0	99	EYCGVPGDGDEELLR	Carbamidomethyl(C)@3		-0.00373322	1707.74	854.876	1707.74	854.878	2	16
1	110.11	38.64	P02760	AMBP_HUMAN	Protein AMBP OS=Homo sapiens GN=AMBP PE=1 SV=1	0	99	EYCGVPGDGDEELLR	Propionamide@N-term; No Carbamidomethyl(C)@3		0.00121754	1721.76	861.886	1721.76	861.886	2	14
1	110.11	38.64	P02760	AMBP_HUMAN	Protein AMBP OS=Homo sapiens GN=AMBP PE=1 SV=1	0	99	EYCGVPGDGDEELLR	Propionamide@N-term; No Carbamidomethyl(C)@3		0.00761673	1721.76	574.929	1721.76	574.926	3	14
1	110.11	38.64	P02760	AMBP_HUMAN	Protein AMBP OS=Homo sapiens GN=AMBP PE=1 SV=1	0	99	EYCGVPGDGDEELLR	Propionamide@N-term; No Carbamidomethyl(C)@3		0.00158374	1721.76	861.886	1721.76	861.886	2	13
1	110.11	38.64	P02760	AMBP_HUMAN	Protein AMBP OS=Homo sapiens GN=AMBP PE=1 SV=1	0	99	EYCGVPGDGDEELLR	Carbamidomethyl(C)@3		-9.03212	1698.71	850.362	1707.74	854.878	2	12
1	110.11	38.64	P02760	AMBP_HUMAN	Protein AMBP OS=Homo sapiens GN=AMBP PE=1 SV=1	0	99	EYCGVPGDGDEELLR	Carbamidomethyl(C)@3		-9.03176	1698.71	850.362	1707.74	854.878	2	11
1	110.11	38.64	P02760	AMBP_HUMAN	Protein AMBP OS=Homo sapiens GN=AMBP PE=1 SV=1	0	99	EYCGVPGDGDEELLR	Carbamidomethyl(C)@3		0.000851246	1707.74	854.878	1707.74	854.878	2	16
1	110.11	38.64	P02760	AMBP_HUMAN	Protein AMBP OS=Homo sapiens GN=AMBP PE=1 SV=1	0	99	EYCGVPGDGDEELLR	Carbamidomethyl(C)@3		-0.0025667	1707.74	854.876	1707.74	854.878	2	15
1	110.11	38.64	P02760	AMBP_HUMAN	Protein AMBP OS=Homo sapiens GN=AMBP PE=1 SV=1	0	99	EYCGVPGDGDEELLR	Carbamidomethyl(C)@3		0.00425226	1707.75	854.88	1707.74	854.878	2	16
1	110.11	38.64	P02760	AMBP_HUMAN	Protein AMBP OS=Homo sapiens GN=AMBP PE=1 SV=1	0	99	EYCGVPGDGDEELLR	Carbamidomethyl(C)@3		-0.00026424	1707.74	854.878	1707.74	854.878	2	15
1	110.11	38.64	P02760	AMBP_HUMAN	Protein AMBP OS=Homo sapiens GN=AMBP PE=1 SV=1	0	99	EYCGVPGDGDEELLR	No Carbamidomethyl(C)@3		0.0165881	1650.74	826.375	1650.72	826.367	2	11
1	110.11	38.64	P02760	AMBP_HUMAN	Protein AMBP OS=Homo sapiens GN=AMBP PE=1 SV=1	0	99	EYCGVPGDGDEELLR	Glu->pyro-Glu@N-term; No Carbamidomethyl(C)@3		0.0265233	1632.74	545.252	1632.71	545.244	3	13
1	110.11	38.64	P02760	AMBP_HUMAN	Protein AMBP OS=Homo sapiens GN=AMBP PE=1 SV=1	0	99	EYCGVPGDGDEELLR	No Carbamidomethyl(C)@3		0.0165881	1650.74	826.375	1650.72	826.367	2	12
1	110.11	38.64	P02760	AMBP_HUMAN	Protein AMBP OS=Homo sapiens GN=AMBP PE=1 SV=1	0	99	EYCGVPGDGDEELLR	Glu->pyro-Glu@N-term; No Carbamidomethyl(C)@3		0.0152701	1632.72	817.369	1632.71	817.362	2	16
1	110.11	38.64	P02760	AMBP_HUMAN	Protein AMBP OS=Homo sapiens GN=AMBP PE=1 SV=1	0	99	EYCGVPGDGDEELLR	No Carbamidomethyl(C)@3		0.020006	1650.74	826.377	1650.72	826.367	2	12
1	110.11	38.64	P02760	AMBP_HUMAN	Protein AMBP OS=Homo sapiens GN=AMBP PE=1 SV=1	0	99	EYCGVPGDGDEELLR	Carbamidomethyl(C)@3		-2.01457	1705.73	853.87	1707.74	854.878	2	13
1	110.11	38.64	P02760	AMBP_HUMAN	Protein AMBP OS=Homo sapiens GN=AMBP PE=1 SV=1	0	99	EYCGVPGDGDEELLR	Carbamidomethyl(C)@3; Cation:Na(D)@8		0.0037689	1729.73	577.583	1729.72	577.582	3	19
1	110.11	38.64	P02760	AMBP_HUMAN	Protein AMBP OS=Homo sapiens GN=AMBP PE=1 SV=1	0	99	EYCGVPGDGDEELLR	Carbamidomethyl(C)@3; Cation:K(D)@8		-0.00830471	1745.69	582.904	1745.7	582.906	3	17
1	110.11	38.64	P02760	AMBP_HUMAN	Protein AMBP OS=Homo sapiens GN=AMBP PE=1 SV=1	0	99	EYCGVPGDGDEELLR	Carbamidomethyl(C)@3; Cation:Na(D)@8		0.0037689	1729.73	577.583	1729.72	577.582	3	18
1	110.11	38.64	P02760	AMBP_HUMAN	Protein AMBP OS=Homo sapiens GN=AMBP PE=1 SV=1	0	99	EYCGVPGDGDEELLR	Propionamide@N-term; No Carbamidomethyl(C)@3		0.00468281	1721.76	861.888	1721.76	861.886	2	13
1	110.11	38.64	P02760	AMBP_HUMAN	Protein AMBP OS=Homo sapiens GN=AMBP PE=1 SV=1	0	99	EYCGVPGDGDEELLR	Propionamide@N-term; No Carbamidomethyl(C)@3		0.00468281	1721.76	861.888	1721.76	861.886	2	18
1	110.11	38.64	P02760	AMBP_HUMAN	Protein AMBP OS=Homo sapiens GN=AMBP PE=1 SV=1	0	99	EYCGVPGDGDEELLR	Propionamide@N-term; No Carbamidomethyl(C)@3		0.00150911	1721.76	861.886	1721.76	861.886	2	15
1	110.11	38.64	P02760	AMBP_HUMAN	Protein AMBP OS=Homo sapiens GN=AMBP PE=1 SV=1	0	99	EYCGVPGDGDEELLR	Carbamidomethyl(C)@3		0.00256701	1707.74	854.879	1707.74	854.878	2	15
1	110.11	38.64	P02760	AMBP_HUMAN	Protein AMBP OS=Homo sapiens GN=AMBP PE=1 SV=1	0	99	EYCGVPGDGDEELLR	Propionamide@N-term; No Carbamidomethyl(C)@3		0.00126497	1721.76	861.886	1721.76	861.886	2	15
1	110.11	38.64	P02760	AMBP_HUMAN	Protein AMBP OS=Homo sapiens GN=AMBP PE=1 SV=1	0	99	EYCGVPGDGDEELLR	Propionamide@N-term; No Carbamidomethyl(C)@3		0.00525277	1721.76	861.888	1721.76	861.886	2	13
1	110.11	38.64	P02760	AMBP_HUMAN	Protein AMBP OS=Homo sapiens GN=AMBP PE=1 SV=1	0	99	EYCGVPGDGDEELLR	Propionamide@N-term; No Carbamidomethyl(C)@3		0.00586311	1721.76	861.889	1721.76	861.886	2	12
1	110.11	38.64	P02760	AMBP_HUMAN	Protein AMBP OS=Homo sapiens GN=AMBP PE=1 SV=1	0	99	EYCGVPGDGDEELLR	Carbamidomethyl(C)@3		-9.03558	1698.71	850.36	1707.74	854.878	2	9
1	110.11	38.64	P02760	AMBP_HUMAN	Protein AMBP OS=Homo sapiens GN=AMBP PE=1 SV=1	0	99	EYCGVPGDGDEELLR	Carbamidomethyl(C)@3		0.00305527	1707.74	854.879	1707.74	854.878	2	15
1	110.11	38.64	P02760	AMBP_HUMAN	Protein AMBP OS=Homo sapiens GN=AMBP PE=1 SV=1	0	99	EYCGVPGDGDEELLR	Carbamidomethyl(C)@3		0.000261541	1707.74	854.878	1707.74	854.878	2	17
1	110.11	38.64	P02760	AMBP_HUMAN	Protein AMBP OS=Homo sapiens GN=AMBP PE=1 SV=1	0	99	EYCGVPGDGDEELLR	Carbamidomethyl(C)@3		0.000871885	1707.74	854.878	1707.74	854.878	2	17
1	110.11	38.64	P02760	AMBP_HUMAN	Protein AMBP OS=Homo sapiens GN=AMBP PE=1 SV=1	0	99	EYCGVPGDGDEELLR	Carbamidomethyl(C)@3		-0.00291225	1707.74	854.876	1707.74	854.878	2	14
1	110.11	38.64	P02760	AMBP_HUMAN	Protein AMBP OS=Homo sapiens GN=AMBP PE=1 SV=1	0	99	EYCGVPGDGDEELLR	Carbamidomethyl(C)@3		0.00038361	1707.74	854.878	1707.74	854.878	2	15
1	110.11	38.64	P02760	AMBP_HUMAN	Protein AMBP OS=Homo sapiens GN=AMBP PE=1 SV=1	0	99	EYCGVPGDGDEELLR	Carbamidomethyl(C)@3		-0.00262194	1707.74	854.876	1707.74	854.878	2	15
1	110.11	38.64	P02760	AMBP_HUMAN	Protein AMBP OS=Homo sapiens GN=AMBP PE=1 SV=1	0	99	EYCGVPGDGDEELLR	Carbamidomethyl(C)@3		0.000627747	1707.74	854.878	1707.74	854.878	2	15
1	110.11	38.64	P02760	AMBP_HUMAN	Protein AMBP OS=Homo sapiens GN=AMBP PE=1 SV=1	0	99	EYCGVPGDGDEELLR	No Carbamidomethyl(C)@3		0.0197663	1650.74	826.377	1650.72	826.367	2	11
1	110.11	38.64	P02760	AMBP_HUMAN	Protein AMBP OS=Homo sapiens GN=AMBP PE=1 SV=1	0	99	EYCGVPGDGDEELLR	Glu->pyro-Glu@N-term; No Carbamidomethyl(C)@3		0.0176764	1632.73	817.371	1632.71	817.362	2	13
1	110.11	38.64	P02760	AMBP_HUMAN	Protein AMBP OS=Homo sapiens GN=AMBP PE=1 SV=1	0	99	EYCGVPGDGDEELLR	No Carbamidomethyl(C)@3		0.0165925	1650.74	826.375	1650.72	826.367	2	12
1	110.11	38.64	P02760	AMBP_HUMAN	Protein AMBP OS=Homo sapiens GN=AMBP PE=1 SV=1	0	99	EYCGVPGDGDEELLR	Glu->pyro-Glu@N-term; No Carbamidomethyl(C)@3		0.0195503	1632.73	545.25	1632.71	545.244	3	15
1	110.11	38.64	P02760	AMBP_HUMAN	Protein AMBP OS=Homo sapiens GN=AMBP PE=1 SV=1	0	99	EYCGVPGDGDEELLR	No Carbamidomethyl(C)@3		0.0165925	1650.74	826.375	1650.72	826.367	2	11
1	110.11	38.64	P02760	AMBP_HUMAN	Protein AMBP OS=Homo sapiens GN=AMBP PE=1 SV=1	0	99	EYCGVPGDGDEELLR	Carbamidomethyl(C)@3		-2.01587	1705.73	853.87	1707.74	854.878	2	13
1	110.11	38.64	P02760	AMBP_HUMAN	Protein AMBP OS=Homo sapiens GN=AMBP PE=1 SV=1	0	99	EYCGVPGDGDEELLR	Carbamidomethyl(C)@3; Cation:Na(D)@8		0.00263301	1729.73	577.582	1729.72	577.582	3	19
1	110.11	38.64	P02760	AMBP_HUMAN	Protein AMBP OS=Homo sapiens GN=AMBP PE=1 SV=1	0	99	EYCGVPGDGDEELLR	Propionamide@N-term; No Carbamidomethyl(C)@3		-0.00103042	1721.76	861.885	1721.76	861.886	2	13
1	110.11	38.64	P02760	AMBP_HUMAN	Protein AMBP OS=Homo sapiens GN=AMBP PE=1 SV=1	0	99	EYCGVPGDGDEELLR	Propionamide@N-term; No Carbamidomethyl(C)@3		-0.00103042	1721.76	861.885	1721.76	861.886	2	18
1	110.11	38.64	P02760	AMBP_HUMAN	Protein AMBP OS=Homo sapiens GN=AMBP PE=1 SV=1	0	99	EYCGVPGDGDEELLR	Propionamide@N-term; No Carbamidomethyl(C)@3		-0.00103042	1721.76	861.885	1721.76	861.886	2	15
1	110.11	38.64	P02760	AMBP_HUMAN	Protein AMBP OS=Homo sapiens GN=AMBP PE=1 SV=1	0	99	EYCGVPGDGDEELLR	Propionamide@N-term; No Carbamidomethyl(C)@3		0.00153303	1721.76	861.886	1721.76	861.886	2	13
1	110.11	38.64	P02760	AMBP_HUMAN	Protein AMBP OS=Homo sapiens GN=AMBP PE=1 SV=1	0	99	EYCGVPGDGDEELLR	Propionamide@N-term; No Carbamidomethyl(C)@3		-0.00139663	1721.76	861.885	1721.76	861.886	2	14
1	110.11	38.64	P02760	AMBP_HUMAN	Protein AMBP OS=Homo sapiens GN=AMBP PE=1 SV=1	0	99	EYCGVPGDGDEELLR	Carbamidomethyl(C)@3		-9.03155	1698.71	850.362	1707.74	854.878	2	12
1	110.11	38.64	P02760	AMBP_HUMAN	Protein AMBP OS=Homo sapiens GN=AMBP PE=1 SV=1	0	99	EYCGVPGDGDEELLR	Glu->pyro-Glu@N-term; Carbamidomethyl(C)@3		-0.000208455	1689.73	845.872	1689.73	845.872	2	15
1	110.11	38.64	P02760	AMBP_HUMAN	Protein AMBP OS=Homo sapiens GN=AMBP PE=1 SV=1	0	99	EYCGVPGDGDEELLR	Carbamidomethyl(C)@3; Cation:Na(D)@8		0.00124445	1729.72	577.582	1729.72	577.582	3	15
1	110.11	38.64	P02760	AMBP_HUMAN	Protein AMBP OS=Homo sapiens GN=AMBP PE=1 SV=1	0	99	EYCGVPGDGDEELLR	Propionamide@N-term; No Carbamidomethyl(C)@3		-0.000799805	1721.76	861.885	1721.76	861.886	2	13
1	110.11	38.64	P02760	AMBP_HUMAN	Protein AMBP OS=Homo sapiens GN=AMBP PE=1 SV=1	0	99	EYCGVPGDGDEELLR	Carbamidomethyl(C)@3		-9.03124	1698.71	850.362	1707.74	854.878	2	12
1	110.11	38.64	P02760	AMBP_HUMAN	Protein AMBP OS=Homo sapiens GN=AMBP PE=1 SV=1	0	99	EYCGVPGDGDEELLR	Carbamidomethyl(C)@3		-0.00211004	1707.74	854.877	1707.74	854.878	2	16
1	110.11	38.64	P02760	AMBP_HUMAN	Protein AMBP OS=Homo sapiens GN=AMBP PE=1 SV=1	0	99	EYCGVPGDGDEELLR	Carbamidomethyl(C)@3		0.00518978	1707.75	570.256	1707.74	570.254	3	15
1	110.11	38.64	P02760	AMBP_HUMAN	Protein AMBP OS=Homo sapiens GN=AMBP PE=1 SV=1	0	99	EYCGVPGDGDEELLR	Carbamidomethyl(C)@3		-0.00201159	1707.74	854.877	1707.74	854.878	2	16
1	110.11	38.64	P02760	AMBP_HUMAN	Protein AMBP OS=Homo sapiens GN=AMBP PE=1 SV=1	0	99	EYCGVPGDGDEELLR	Glu->pyro-Glu@N-term; Carbamidomethyl(C)@3		0.00259541	1689.73	845.874	1689.73	845.872	2	16
1	110.11	38.64	P02760	AMBP_HUMAN	Protein AMBP OS=Homo sapiens GN=AMBP PE=1 SV=1	0	99	EYCGVPGDGDEELLR	Carbamidomethyl(C)@3		-0.00225573	1707.74	854.877	1707.74	854.878	2	15
1	110.11	38.64	P02760	AMBP_HUMAN	Protein AMBP OS=Homo sapiens GN=AMBP PE=1 SV=1	0	99	EYCGVPGDGDEELLR	Carbamidomethyl(C)@3		-0.00164539	1707.74	854.877	1707.74	854.878	2	13
1	110.11	38.64	P02760	AMBP_HUMAN	Protein AMBP OS=Homo sapiens GN=AMBP PE=1 SV=1	0	99	EYCGVPGDGDEELLR	Glu->pyro-Glu@N-term; Carbamidomethyl(C)@3		0.00259541	1689.73	845.874	1689.73	845.872	2	15
1	110.11	38.64	P02760	AMBP_HUMAN	Protein AMBP OS=Homo sapiens GN=AMBP PE=1 SV=1	0	99	EYCGVPGDGDEELLR	Glu->pyro-Glu@N-term; Carbamidomethyl(C)@3		0.00259541	1689.73	845.874	1689.73	845.872	2	15
1	110.11	38.64	P02760	AMBP_HUMAN	Protein AMBP OS=Homo sapiens GN=AMBP PE=1 SV=1	0	99	EYCGVPGDGDEELLR	Amino(Y)@2; Carbamidomethyl(C)@3		-0.00243067	1722.75	575.257	1722.75	575.258	3	11
1	110.11	38.64	P02760	AMBP_HUMAN	Protein AMBP OS=Homo sapiens GN=AMBP PE=1 SV=1	0	99	EYCGVPGDGDEELLRF	Carbamidomethyl(C)@3	cleaved F-S@C-term; missed R-F@15	0.00154609	1854.81	619.278	1854.81	619.277	3	17
1	110.11	38.64	P02760	AMBP_HUMAN	Protein AMBP OS=Homo sapiens GN=AMBP PE=1 SV=1	0	99	EYCGVPGDGDEELLRF	Carbamidomethyl(C)@3; Cation:Na(D)@8	cleaved F-S@C-term; missed R-F@15	0.00497238	1876.8	626.606	1876.79	626.604	3	20
1	110.11	38.64	P02760	AMBP_HUMAN	Protein AMBP OS=Homo sapiens GN=AMBP PE=1 SV=1	0	99	EYCGVPGDGDEELLRF	Carbamidomethyl(C)@3	cleaved F-S@C-term; missed R-F@15	-0.000264111	1854.81	928.412	1854.81	928.412	2	17
1	110.11	38.64	P02760	AMBP_HUMAN	Protein AMBP OS=Homo sapiens GN=AMBP PE=1 SV=1	0	99	EYCGVPGDGDEELLRF	Carbamidomethyl(C)@3	cleaved F-S@C-term; missed R-F@15	0.00210436	1854.81	928.413	1854.81	928.412	2	15
1	110.11	38.64	P02760	AMBP_HUMAN	Protein AMBP OS=Homo sapiens GN=AMBP PE=1 SV=1	0	99	FPYGGCQGNGNKFYSEKECREYCGVPGDGDEELLR	Carbamidomethyl(C)@6; Carbamidomethyl(C)@19; Carbamidomethyl(C)@23	cleaved L-F@N-term; missed K-F@12; missed K-E@17; missed R-E@20	-13.0363	4073.72	679.961	4086.76	682.133	6	9
1	110.11	38.64	P02760	AMBP_HUMAN	Protein AMBP OS=Homo sapiens GN=AMBP PE=1 SV=1	0	99	FPYGGCQGNGNKFYSEKECREYCGVPGDGDEELLR	Carbamidomethyl(C)@6; Carbamidomethyl(C)@19; Carbamidomethyl(C)@23	cleaved L-F@N-term; missed K-F@12; missed K-E@17; missed R-E@20	-13.0384	4073.72	679.96	4086.76	682.133	6	12
1	110.11	38.64	P02760	AMBP_HUMAN	Protein AMBP OS=Homo sapiens GN=AMBP PE=1 SV=1	0	99	FPYGGCQGNGNKFYSEKECREYCGVPGDGDEELLR	Carbamidomethyl(C)@6; Carbamidomethyl(C)@19; Carbamidomethyl(C)@23	cleaved L-F@N-term; missed K-F@12; missed K-E@17; missed R-E@20	-13.0274	4073.73	679.962	4086.76	682.133	6	12
1	110.11	38.64	P02760	AMBP_HUMAN	Protein AMBP OS=Homo sapiens GN=AMBP PE=1 SV=1	0	99	FPYGGCQGNGNKFYSEKECREYCGVPGDGDEELLR	Carbamidomethyl(C)@6; Carbamidomethyl(C)@19; Carbamidomethyl(C)@23	cleaved L-F@N-term; missed K-F@12; missed K-E@17; missed R-E@20	-13.0258	4073.73	679.962	4086.76	682.133	6	12
1	110.11	38.64	P02760	AMBP_HUMAN	Protein AMBP OS=Homo sapiens GN=AMBP PE=1 SV=1	0	99	FYSEKECR	Formyl(K)@5; Carbamidomethyl(C)@7	missed K-E@5	-0.00185134	1145.48	573.747	1145.48	573.748	2	9
1	110.11	38.64	P02760	AMBP_HUMAN	Protein AMBP OS=Homo sapiens GN=AMBP PE=1 SV=1	0	99	GDEELLR		cleaved D-G@N-term	0.00015488	830.414	416.214	830.413	416.214	2	9
1	110.11	38.64	P02760	AMBP_HUMAN	Protein AMBP OS=Homo sapiens GN=AMBP PE=1 SV=1	0	99	GDEELLR		cleaved D-G@N-term	-0.000341959	830.413	416.214	830.413	416.214	2	9
1	110.11	38.64	P02760	AMBP_HUMAN	Protein AMBP OS=Homo sapiens GN=AMBP PE=1 SV=1	0	99	GGQLVTEVTK		cleaved G-G@N-term	-0.00448906	1030.56	516.288	1030.57	516.29	2	13
1	110.11	38.64	P02760	AMBP_HUMAN	Protein AMBP OS=Homo sapiens GN=AMBP PE=1 SV=1	0	99	GGQLVTEVTK		cleaved G-G@N-term	-0.00285473	1030.56	516.289	1030.57	516.29	2	14
1	110.11	38.64	P02760	AMBP_HUMAN	Protein AMBP OS=Homo sapiens GN=AMBP PE=1 SV=1	0	99	GGQLVTEVTK		cleaved G-G@N-term	-0.00309887	1030.56	516.289	1030.57	516.29	2	14
1	110.11	38.64	P02760	AMBP_HUMAN	Protein AMBP OS=Homo sapiens GN=AMBP PE=1 SV=1	0	99	GGQLVTEVTK		cleaved G-G@N-term	-0.00117922	1030.56	516.29	1030.57	516.29	2	14
1	110.11	38.64	P02760	AMBP_HUMAN	Protein AMBP OS=Homo sapiens GN=AMBP PE=1 SV=1	0	99	GGQLVTEVTK		cleaved G-G@N-term	-0.00178956	1030.56	516.289	1030.57	516.29	2	13
1	110.11	38.64	P02760	AMBP_HUMAN	Protein AMBP OS=Homo sapiens GN=AMBP PE=1 SV=1	0	99	GKCVLFPYGGCQGNGNK	Carbamidomethyl(C)@3; Carbamidomethyl(C)@11	missed K-C@2	-0.00274397	1854.85	619.29	1854.85	619.291	3	19
1	110.11	38.64	P02760	AMBP_HUMAN	Protein AMBP OS=Homo sapiens GN=AMBP PE=1 SV=1	0	99	GKCVLFPYGGCQGNGNK	Carbamidomethyl(C)@3; Carbamidomethyl(C)@11; Deamidated(N)@14	missed K-C@2	-0.00148179	1855.83	619.618	1855.83	619.619	3	20
1	110.11	38.64	P02760	AMBP_HUMAN	Protein AMBP OS=Homo sapiens GN=AMBP PE=1 SV=1	0	99	GNNFVTEKECLQTCR	Carbamidomethyl(C)@10; Carbamidomethyl(C)@14	cleaved N-G@N-term; missed K-E@8	-0.00195296	1854.83	619.285	1854.84	619.286	3	17
1	110.11	38.64	P02760	AMBP_HUMAN	Protein AMBP OS=Homo sapiens GN=AMBP PE=1 SV=1	0	99	GQLVTEVTK		cleaved G-G@N-term	-0.00119593	973.543	487.779	973.544	487.779	2	9
1	110.11	38.64	P02760	AMBP_HUMAN	Protein AMBP OS=Homo sapiens GN=AMBP PE=1 SV=1	0	99	GQLVTEVTK		cleaved G-G@N-term	-0.00119593	973.543	487.779	973.544	487.779	2	10
1	110.11	38.64	P02760	AMBP_HUMAN	Protein AMBP OS=Homo sapiens GN=AMBP PE=1 SV=1	0	99	GQLVTEVTK		cleaved G-G@N-term	-0.00199343	973.542	487.779	973.544	487.779	2	9
1	110.11	38.64	P02760	AMBP_HUMAN	Protein AMBP OS=Homo sapiens GN=AMBP PE=1 SV=1	0	99	GQLVTEVTK		cleaved G-G@N-term	-0.00217653	973.542	487.778	973.544	487.779	2	8
1	110.11	38.64	P02760	AMBP_HUMAN	Protein AMBP OS=Homo sapiens GN=AMBP PE=1 SV=1	0	99	GVPGDGDEELLR		cleaved C-G@N-term	-0.00265316	1255.6	628.808	1255.6	628.81	2	10
1	110.11	38.64	P02760	AMBP_HUMAN	Protein AMBP OS=Homo sapiens GN=AMBP PE=1 SV=1	0	99	GVPGDGDEELLR		cleaved C-G@N-term	0.00242184	1255.61	628.811	1255.6	628.81	2	10
1	110.11	38.64	P02760	AMBP_HUMAN	Protein AMBP OS=Homo sapiens GN=AMBP PE=1 SV=1	0	99	GVPGDGDEELLR		cleaved C-G@N-term	0.00242184	1255.61	628.811	1255.6	628.81	2	10
1	110.11	38.64	P02760	AMBP_HUMAN	Protein AMBP OS=Homo sapiens GN=AMBP PE=1 SV=1	0	99	GVPGDGDEELLR		cleaved C-G@N-term	-0.000731426	1255.6	628.809	1255.6	628.81	2	10
1	110.11	38.64	P02760	AMBP_HUMAN	Protein AMBP OS=Homo sapiens GN=AMBP PE=1 SV=1	0	99	GVPGDGDEELLR		cleaved C-G@N-term	0.00160562	1255.61	628.81	1255.6	628.81	2	11
1	110.11	38.64	P02760	AMBP_HUMAN	Protein AMBP OS=Homo sapiens GN=AMBP PE=1 SV=1	0	99	GVPGDGDEELLR		cleaved C-G@N-term	-0.00181232	1255.6	628.809	1255.6	628.81	2	10
1	110.11	38.64	P02760	AMBP_HUMAN	Protein AMBP OS=Homo sapiens GN=AMBP PE=1 SV=1	0	99	IQLWAFDAVK		cleaved F-I@N-term	-0.00196968	1189.65	595.831	1189.65	595.832	2	11
1	110.11	38.64	P02760	AMBP_HUMAN	Protein AMBP OS=Homo sapiens GN=AMBP PE=1 SV=1	0	99	KEDSCQLGY	Carbamidomethyl(C)@5	cleaved Y-S@C-term; missed K-E@1	-0.0032325	1098.46	550.238	1098.47	550.24	2	11
1	110.11	38.64	P02760	AMBP_HUMAN	Protein AMBP OS=Homo sapiens GN=AMBP PE=1 SV=1	0	99	KEDSCQLGY	Carbamidomethyl(C)@5	cleaved Y-S@C-term; missed K-E@1	-0.00347664	1098.46	550.238	1098.47	550.24	2	13
1	110.11	38.64	P02760	AMBP_HUMAN	Protein AMBP OS=Homo sapiens GN=AMBP PE=1 SV=1	0	99	KEDSCQLGY	Carbamidomethyl(C)@5	cleaved Y-S@C-term; missed K-E@1	-0.00359871	1098.46	550.238	1098.47	550.24	2	13
1	110.11	38.64	P02760	AMBP_HUMAN	Protein AMBP OS=Homo sapiens GN=AMBP PE=1 SV=1	0	99	KEDSCQLGY	Carbamidomethyl(C)@5	cleaved Y-S@C-term; missed K-E@1	-0.00359871	1098.46	550.238	1098.47	550.24	2	11
1	110.11	38.64	P02760	AMBP_HUMAN	Protein AMBP OS=Homo sapiens GN=AMBP PE=1 SV=1	0	99	KEDSCQLGY	Carbamidomethyl(C)@5	cleaved Y-S@C-term; missed K-E@1	-0.00152991	1098.46	550.239	1098.47	550.24	2	11
1	110.11	38.64	P02760	AMBP_HUMAN	Protein AMBP OS=Homo sapiens GN=AMBP PE=1 SV=1	0	99	KEDSCQLGY	Carbamidomethyl(C)@5	cleaved Y-S@C-term; missed K-E@1	-0.00152991	1098.46	550.239	1098.47	550.24	2	11
1	110.11	38.64	P02760	AMBP_HUMAN	Protein AMBP OS=Homo sapiens GN=AMBP PE=1 SV=1	0	99	KEDSCQLGY	Carbamidomethyl(C)@5	cleaved Y-S@C-term; missed K-E@1	0.000428171	1098.47	550.24	1098.47	550.24	2	10
1	110.11	38.64	P02760	AMBP_HUMAN	Protein AMBP OS=Homo sapiens GN=AMBP PE=1 SV=1	0	99	KEDSCQLGY	Carbamidomethyl(C)@5	cleaved Y-S@C-term; missed K-E@1	6.19627e-05	1098.47	550.24	1098.47	550.24	2	10
1	110.11	38.64	P02760	AMBP_HUMAN	Protein AMBP OS=Homo sapiens GN=AMBP PE=1 SV=1	0	99	KEDSCQLGY	Carbamidomethyl(C)@5	cleaved Y-S@C-term; missed K-E@1	-0.000805886	1098.46	550.239	1098.47	550.24	2	10
1	110.11	38.64	P02760	AMBP_HUMAN	Protein AMBP OS=Homo sapiens GN=AMBP PE=1 SV=1	0	99	KEDSCQLGY	Carbamidomethyl(C)@5	cleaved Y-S@C-term; missed K-E@1	-0.000927955	1098.46	550.239	1098.47	550.24	2	12
1	110.11	38.64	P02760	AMBP_HUMAN	Protein AMBP OS=Homo sapiens GN=AMBP PE=1 SV=1	0	99	KEDSCQLGY	Carbamidomethyl(C)@5	cleaved Y-S@C-term; missed K-E@1	-0.000805886	1098.46	550.239	1098.47	550.24	2	11
1	110.11	38.64	P02760	AMBP_HUMAN	Protein AMBP OS=Homo sapiens GN=AMBP PE=1 SV=1	0	99	KEDSCQLGY	Carbamidomethyl(C)@5	cleaved Y-S@C-term; missed K-E@1	-0.000465088	1098.46	550.24	1098.47	550.24	2	11
1	110.11	38.64	P02760	AMBP_HUMAN	Protein AMBP OS=Homo sapiens GN=AMBP PE=1 SV=1	0	99	KEDSCQLGYSAGPC	Carbamidomethyl(C)@5; Carbamidomethyl(C)@14	cleaved C-M@C-term; missed K-E@1	-0.00474437	1570.63	786.324	1570.64	786.327	2	18
1	110.11	38.64	P02760	AMBP_HUMAN	Protein AMBP OS=Homo sapiens GN=AMBP PE=1 SV=1	0	99	KEDSCQLGYSAGPC	Carbamidomethyl(C)@5; Carbamidomethyl(C)@14	cleaved C-M@C-term; missed K-E@1	-0.00176301	1570.64	786.326	1570.64	786.327	2	18
1	110.11	38.64	P02760	AMBP_HUMAN	Protein AMBP OS=Homo sapiens GN=AMBP PE=1 SV=1	0	99	KEDSCQLGYSAGPCMGMTSR	Carbamidomethyl(C)@5; Carbamidomethyl(C)@14; Oxidation(M)@15; Oxidation(M)@17	missed K-E@1	-0.00591372	2265.91	756.309	2265.91	756.311	3	20
1	110.11	38.64	P02760	AMBP_HUMAN	Protein AMBP OS=Homo sapiens GN=AMBP PE=1 SV=1	0	99	KEDSCQLGYSAGPCMGMTSR	Carbamidomethyl(C)@5; Carbamidomethyl(C)@14; Oxidation(M)@15; Oxidation(M)@17	missed K-E@1	-0.00243947	2265.91	756.311	2265.91	756.311	3	22
1	110.11	38.64	P02760	AMBP_HUMAN	Protein AMBP OS=Homo sapiens GN=AMBP PE=1 SV=1	0	99	KEDSCQLGYSAGPCMGMTSR	Carbamidomethyl(C)@5; Carbamidomethyl(C)@14; Oxidation(M)@15; Oxidation(M)@17	missed K-E@1	0.00689879	2265.92	756.314	2265.91	756.311	3	21
1	110.11	38.64	P02760	AMBP_HUMAN	Protein AMBP OS=Homo sapiens GN=AMBP PE=1 SV=1	0	99	KEDSCQLGYSAGPCMGMTSR	Carbamidomethyl(C)@5; Carbamidomethyl(C)@14; Oxidation(M)@15; Oxidation(M)@17	missed K-E@1	-0.00152395	2265.91	756.311	2265.91	756.311	3	21
1	110.11	38.64	P02760	AMBP_HUMAN	Protein AMBP OS=Homo sapiens GN=AMBP PE=1 SV=1	0	99	KEDSCQLGYSAGPCMGMTSR	Carbamidomethyl(C)@5; Carbamidomethyl(C)@14; Oxidation(M)@15	missed K-E@1	0.0011546	2249.92	750.98	2249.92	750.98	3	22
1	110.11	38.64	P02760	AMBP_HUMAN	Protein AMBP OS=Homo sapiens GN=AMBP PE=1 SV=1	0	99	KEDSCQLGYSAGPCMGMTSR	Carbamidomethyl(C)@5; Carbamidomethyl(C)@14; Oxidation(M)@17	missed K-E@1	0.00298563	2249.92	750.981	2249.92	750.98	3	21
1	110.11	38.64	P02760	AMBP_HUMAN	Protein AMBP OS=Homo sapiens GN=AMBP PE=1 SV=1	0	99	KEDSCQLGYSAGPCMGMTSR	Carbamidomethyl(C)@5; Carbamidomethyl(C)@14; Oxidation(M)@15; Oxidation(M)@17	missed K-E@1	0.00620645	2265.92	756.313	2265.91	756.311	3	21
1	110.11	38.64	P02760	AMBP_HUMAN	Protein AMBP OS=Homo sapiens GN=AMBP PE=1 SV=1	0	99	KEDSCQLGYSAGPCMGMTSR	Carbamidomethyl(C)@5; Carbamidomethyl(C)@14; Oxidation(M)@15; Oxidation(M)@17	missed K-E@1	0.00693886	2265.92	756.314	2265.91	756.311	3	21
1	110.11	38.64	P02760	AMBP_HUMAN	Protein AMBP OS=Homo sapiens GN=AMBP PE=1 SV=1	0	99	KEDSCQLGYSAGPCMGMTSR	Carbamidomethyl(C)@5; Carbamidomethyl(C)@14; Oxidation(M)@15	missed K-E@1	0.00492715	2249.92	750.981	2249.92	750.98	3	20
1	110.11	38.64	P02760	AMBP_HUMAN	Protein AMBP OS=Homo sapiens GN=AMBP PE=1 SV=1	0	99	KEDSCQLGYSAGPCMGMTSR	Carbamidomethyl(C)@5; Carbamidomethyl(C)@14; Oxidation(M)@17	missed K-E@1	0.000715747	2249.92	750.98	2249.92	750.98	3	21
1	110.11	38.64	P02760	AMBP_HUMAN	Protein AMBP OS=Homo sapiens GN=AMBP PE=1 SV=1	0	99	KEDSCQLGYSAGPCMGMTSR	Carbamidomethyl(C)@5; Carbamidomethyl(C)@14; Oxidation(M)@17; Carbamidomethyl(T)@18	missed K-E@1	0.000794959	2306.94	577.742	2306.94	577.742	4	11
1	110.11	38.64	P02760	AMBP_HUMAN	Protein AMBP OS=Homo sapiens GN=AMBP PE=1 SV=1	0	99	KEDSCQLGYSAGPCMGMTSR	Carbamidomethyl(C)@5; No Carbamidomethyl(C)@14; Oxidation(M)@15; Oxidation(M)@17	missed K-E@1	0.0151675	2208.91	737.309	2208.89	737.304	3	13
1	110.11	38.64	P02760	AMBP_HUMAN	Protein AMBP OS=Homo sapiens GN=AMBP PE=1 SV=1	0	99	KEDSCQLGYSAGPCMGMTSR	Carbamidomethyl(C)@5; No Carbamidomethyl(C)@14; Oxidation(M)@15; Oxidation(M)@17	missed K-E@1	0.0100406	2208.9	737.308	2208.89	737.304	3	17
1	110.11	38.64	P02760	AMBP_HUMAN	Protein AMBP OS=Homo sapiens GN=AMBP PE=1 SV=1	0	99	KEDSCQLGYSAGPCMGMTSR	Carbamidomethyl(C)@5; Carbamidomethyl(C)@14; Oxidation(M)@15; Oxidation(M)@17	missed K-E@1	-0.00728477	2265.91	756.309	2265.91	756.311	3	22
1	110.11	38.64	P02760	AMBP_HUMAN	Protein AMBP OS=Homo sapiens GN=AMBP PE=1 SV=1	0	99	KEDSCQLGYSAGPCMGMTSR	Carbamidomethyl(C)@5; Carbamidomethyl(C)@14; Oxidation(M)@15; Oxidation(M)@17; Cation:Na@C-term	missed K-E@1	-0.00221463	2287.89	572.98	2287.89	572.981	4	14
1	110.11	38.64	P02760	AMBP_HUMAN	Protein AMBP OS=Homo sapiens GN=AMBP PE=1 SV=1	0	99	KEDSCQLGYSAGPCMGMTSR	Carbamidomethyl(C)@5; Carbamidomethyl(C)@14; Oxidation(M)@15; Oxidation(M)@17	missed K-E@1	-0.00290734	2265.91	567.485	2265.91	567.485	4	23
1	110.11	38.64	P02760	AMBP_HUMAN	Protein AMBP OS=Homo sapiens GN=AMBP PE=1 SV=1	0	99	KEDSCQLGYSAGPCMGMTSR	Carbamidomethyl(C)@5; Oxidation(P)@13; Carbamidomethyl(C)@14; Dethiomethyl(M)@15; Oxidation(M)@17	missed K-E@1	-0.00543237	2217.9	740.308	2217.91	740.31	3	13
1	110.11	38.64	P02760	AMBP_HUMAN	Protein AMBP OS=Homo sapiens GN=AMBP PE=1 SV=1	0	99	KEDSCQLGYSAGPCMGMTSR	Carbamidomethyl(C)@5; Carbamidomethyl(C)@14; Oxidation(M)@15; Oxidation(M)@17	missed K-E@1	-0.00290734	2265.91	567.485	2265.91	567.485	4	22
1	110.11	38.64	P02760	AMBP_HUMAN	Protein AMBP OS=Homo sapiens GN=AMBP PE=1 SV=1	0	99	KEDSCQLGYSAGPCMGMTSR	Carbamidomethyl(C)@5; Carbamidomethyl(C)@14; Oxidation(M)@15; Oxidation(M)@17	missed K-E@1	-0.00618615	2265.91	756.309	2265.91	756.311	3	22
1	110.11	38.64	P02760	AMBP_HUMAN	Protein AMBP OS=Homo sapiens GN=AMBP PE=1 SV=1	0	99	KEDSCQLGYSAGPCMGMTSR	Carbamidomethyl(C)@5; Carbamidomethyl(C)@14; Oxidation(M)@15; Oxidation(M)@17	missed K-E@1	-0.00618615	2265.91	756.309	2265.91	756.311	3	21
1	110.11	38.64	P02760	AMBP_HUMAN	Protein AMBP OS=Homo sapiens GN=AMBP PE=1 SV=1	0	99	KEDSCQLGYSAGPCMGMTSR	Carbamidomethyl(C)@5; Pro->pyro-Glu(P)@13; Carbamidomethyl(C)@14; Oxidation(M)@15; Oxidation(M)@17	missed K-E@1	0.0285101	2279.92	760.981	2279.89	760.971	3	14
1	110.11	38.64	P02760	AMBP_HUMAN	Protein AMBP OS=Homo sapiens GN=AMBP PE=1 SV=1	0	99	KEDSCQLGYSAGPCMGMTSR	Delta:H(2)C(2)(K)@1; Carbamidomethyl(C)@5; Amino(Y)@9; Carbamidomethyl(C)@14; Oxidation(M)@15; Oxidation(M)@17	missed K-E@1	-0.00689195	2306.93	769.985	2306.94	769.987	3	13
1	110.11	38.64	P02760	AMBP_HUMAN	Protein AMBP OS=Homo sapiens GN=AMBP PE=1 SV=1	0	99	KEDSCQLGYSAGPCMGMTSR	Carbamidomethyl(C)@5; Pro->pyro-Glu(P)@13; Carbamidomethyl(C)@14; Oxidation(M)@15; Oxidation(M)@17	missed K-E@1	0.0285101	2279.92	760.981	2279.89	760.971	3	13
1	110.11	38.64	P02760	AMBP_HUMAN	Protein AMBP OS=Homo sapiens GN=AMBP PE=1 SV=1	0	99	KEDSCQLGYSAGPCMGMTSR	Carbamidomethyl(C)@5; Carbamidomethyl(C)@14; Oxidation(M)@15; Oxidation(M)@17	missed K-E@1	-0.00801718	2265.9	756.309	2265.91	756.311	3	20
1	110.11	38.64	P02760	AMBP_HUMAN	Protein AMBP OS=Homo sapiens GN=AMBP PE=1 SV=1	0	99	KEDSCQLGYSAGPCMGMTSR	Carbamidomethyl(C)@5; Carbamidomethyl(C)@14; Oxidation(M)@15; Oxidation(M)@17	missed K-E@1	-0.00728477	2265.91	756.309	2265.91	756.311	3	20
1	110.11	38.64	P02760	AMBP_HUMAN	Protein AMBP OS=Homo sapiens GN=AMBP PE=1 SV=1	0	99	KEDSCQLGYSAGPCMGMTSR	Carbamidomethyl(C)@5; Carbamidomethyl(C)@14; Oxidation(M)@15; Dioxidation(M)@17	missed K-E@1	-0.0083473	2281.9	761.64	2281.91	761.643	3	20
1	110.11	38.64	P02760	AMBP_HUMAN	Protein AMBP OS=Homo sapiens GN=AMBP PE=1 SV=1	0	99	KEDSCQLGYSAGPCMGMTSR	Carbamidomethyl(C)@5; Carbamidomethyl(C)@14; Carbamyl(M)@15; Oxidation(M)@17	missed K-E@1	-0.00611726	2292.92	765.313	2292.92	765.315	3	21
1	110.11	38.64	P02760	AMBP_HUMAN	Protein AMBP OS=Homo sapiens GN=AMBP PE=1 SV=1	0	99	KEDSCQLGYSAGPCMGMTSR	Carbamidomethyl(C)@5; Carbamidomethyl(C)@14; Oxidation(M)@15; Dioxidation(M)@17	missed K-E@1	-0.0083473	2281.9	761.64	2281.91	761.643	3	22
1	110.11	38.64	P02760	AMBP_HUMAN	Protein AMBP OS=Homo sapiens GN=AMBP PE=1 SV=1	0	99	KEDSCQLGYSAGPCMGMTSR	Carbamidomethyl(C)@5; Carbamidomethyl(C)@14; Oxidation(M)@15; Oxidation(M)@17	missed K-E@1	-0.0109468	2265.9	756.308	2265.91	756.311	3	22
1	110.11	38.64	P02760	AMBP_HUMAN	Protein AMBP OS=Homo sapiens GN=AMBP PE=1 SV=1	0	99	KEDSCQLGYSAGPCMGMTSR	Carbamidomethyl(C)@5; Carbamidomethyl(C)@14; Oxidation(M)@15; Oxidation(M)@17	missed K-E@1	-0.00673546	2265.91	756.309	2265.91	756.311	3	21
1	110.11	38.64	P02760	AMBP_HUMAN	Protein AMBP OS=Homo sapiens GN=AMBP PE=1 SV=1	0	99	KEDSCQLGYSAGPCMGMTSR	Carbamidomethyl(C)@5; Carbamidomethyl(C)@14; Oxidation(M)@15; Oxidation(M)@17	missed K-E@1	-0.00673546	2265.91	756.309	2265.91	756.311	3	19
1	110.11	38.64	P02760	AMBP_HUMAN	Protein AMBP OS=Homo sapiens GN=AMBP PE=1 SV=1	0	99	KEDSCQLGYSAGPCMGMTSR	Carbamidomethyl(C)@5; Carbamidomethyl(C)@14; Oxidation(M)@15; Oxidation(M)@17	missed K-E@1	-0.00765097	2265.9	756.309	2265.91	756.311	3	19
1	110.11	38.64	P02760	AMBP_HUMAN	Protein AMBP OS=Homo sapiens GN=AMBP PE=1 SV=1	0	99	KEDSCQLGYSAGPCMGMTSR	Carbamidomethyl(C)@5; No Carbamidomethyl(C)@14; Oxidation(M)@15	missed K-E@1	0.0125648	2192.91	731.977	2192.9	731.973	3	15
1	110.11	38.64	P02760	AMBP_HUMAN	Protein AMBP OS=Homo sapiens GN=AMBP PE=1 SV=1	0	99	KEDSCQLGYSAGPCMGMTSR	Carbamidomethyl(C)@5; Carbamidomethyl(C)@14; Oxidation(M)@15; Oxidation(M)@17	missed K-E@1	-0.00563684	2265.91	756.309	2265.91	756.311	3	18
1	110.11	38.64	P02760	AMBP_HUMAN	Protein AMBP OS=Homo sapiens GN=AMBP PE=1 SV=1	0	99	KEDSCQLGYSAGPCMGMTSR	Carbamidomethyl(C)@5; Carbamidomethyl(C)@14; Oxidation(M)@15; Oxidation(M)@17	missed K-E@1	-0.00234099	2265.91	756.311	2265.91	756.311	3	21
1	110.11	38.64	P02760	AMBP_HUMAN	Protein AMBP OS=Homo sapiens GN=AMBP PE=1 SV=1	0	99	KEDSCQLGYSAGPCMGMTSR	Carbamidomethyl(C)@5; No Carbamidomethyl(C)@14; Oxidation(M)@15	missed K-E@1	0.0178748	2192.91	731.979	2192.9	731.973	3	16
1	110.11	38.64	P02760	AMBP_HUMAN	Protein AMBP OS=Homo sapiens GN=AMBP PE=1 SV=1	0	99	KEDSCQLGYSAGPCMGMTSR	Delta:H(4)C(2)(K)@1; Carbamidomethyl(C)@5; Carbamidomethyl(C)@14; Oxidation(M)@15; Oxidation(M)@17	missed K-E@1	-0.00169167	2293.94	765.654	2293.94	765.655	3	20
1	110.11	38.64	P02760	AMBP_HUMAN	Protein AMBP OS=Homo sapiens GN=AMBP PE=1 SV=1	0	99	KEDSCQLGYSAGPCMGMTSR	Carbamidomethyl(C)@5; Carbamidomethyl(C)@14; Oxidation(M)@15; Oxidation(M)@17	missed K-E@1	-0.00655235	2265.91	756.309	2265.91	756.311	3	19
1	110.11	38.64	P02760	AMBP_HUMAN	Protein AMBP OS=Homo sapiens GN=AMBP PE=1 SV=1	0	99	KEDSCQLGYSAGPCMGMTSR	Carbamidomethyl(C)@5; Carbamidomethyl(C)@14; Oxidation(M)@15; Oxidation(M)@17	missed K-E@1	-0.00710166	2265.91	756.309	2265.91	756.311	3	18
1	110.11	38.64	P02760	AMBP_HUMAN	Protein AMBP OS=Homo sapiens GN=AMBP PE=1 SV=1	0	99	KEDSCQLGYSAGPCMGMTSR	Carbamidomethyl(C)@5; Carbamidomethyl(C)@14; Oxidation(M)@15	missed K-E@1	-0.00256082	2249.91	750.979	2249.92	750.98	3	23
1	110.11	38.64	P02760	AMBP_HUMAN	Protein AMBP OS=Homo sapiens GN=AMBP PE=1 SV=1	0	99	KEDSCQLGYSAGPCMGMTSR	Carbamidomethyl(C)@5; Carbamidomethyl(C)@14; Oxidation(M)@15; Oxidation(M)@17	missed K-E@1	-0.00710166	2265.91	756.309	2265.91	756.311	3	19
1	110.11	38.64	P02760	AMBP_HUMAN	Protein AMBP OS=Homo sapiens GN=AMBP PE=1 SV=1	0	99	KEDSCQLGYSAGPCMGMTSR	Carbamidomethyl(C)@5; Carbamidomethyl(C)@14; Oxidation(M)@15	missed K-E@1	-0.00256082	2249.91	750.979	2249.92	750.98	3	24
1	110.11	38.64	P02760	AMBP_HUMAN	Protein AMBP OS=Homo sapiens GN=AMBP PE=1 SV=1	0	99	KEDSCQLGYSAGPCMGMTSR	Propionamide(K)@1; No Carbamidomethyl(C)@5; Carbamidomethyl(C)@14; Oxidation(M)@15	missed K-E@1	-0.0015029	2263.93	755.651	2263.93	755.652	3	16
1	110.11	38.64	P02760	AMBP_HUMAN	Protein AMBP OS=Homo sapiens GN=AMBP PE=1 SV=1	0	99	KEDSCQLGYSAGPCMGMTSR	Carbamidomethyl(C)@5; Carbamidomethyl(C)@14; Oxidation(M)@17	missed K-E@1	-0.00219462	2249.92	750.979	2249.92	750.98	3	23
1	110.11	38.64	P02760	AMBP_HUMAN	Protein AMBP OS=Homo sapiens GN=AMBP PE=1 SV=1	0	99	KEDSCQLGYSAGPCMGMTSR	Carbamidomethyl(C)@5; Pro->pyro-Glu(P)@13; Carbamidomethyl(C)@14; Oxidation(M)@17	missed K-E@1	0.0348826	2263.93	755.651	2263.9	755.639	3	14
1	110.11	38.64	P02760	AMBP_HUMAN	Protein AMBP OS=Homo sapiens GN=AMBP PE=1 SV=1	0	99	KEDSCQLGYSAGPCMGMTSR	Carbamidomethyl(C)@5; Carbamidomethyl(C)@14; Oxidation(M)@17	missed K-E@1	-0.00219462	2249.92	750.979	2249.92	750.98	3	22
1	110.11	38.64	P02760	AMBP_HUMAN	Protein AMBP OS=Homo sapiens GN=AMBP PE=1 SV=1	0	99	KEDSCQLGYSAGPCMGMTSR	Carbamidomethyl(C)@5; Pro->pyro-Glu(P)@13; Carbamidomethyl(C)@14; Oxidation(M)@17	missed K-E@1	0.0310374	2263.93	755.65	2263.9	755.639	3	14
1	110.11	38.64	P02760	AMBP_HUMAN	Protein AMBP OS=Homo sapiens GN=AMBP PE=1 SV=1	0	99	KEDSCQLGYSAGPCMGMTSR	Carbamidomethyl(C)@5; Carbamidomethyl(C)@14; Oxidation(M)@17	missed K-E@1	-0.0012791	2249.92	750.979	2249.92	750.98	3	22
1	110.11	38.64	P02760	AMBP_HUMAN	Protein AMBP OS=Homo sapiens GN=AMBP PE=1 SV=1	0	99	KEDSCQLGYSAGPCMGMTSR	Carbamidomethyl(C)@5; Carbamidomethyl(C)@14; Oxidation(M)@15	missed K-E@1	-0.0073215	2249.91	750.977	2249.92	750.98	3	20
1	110.11	38.64	P02760	AMBP_HUMAN	Protein AMBP OS=Homo sapiens GN=AMBP PE=1 SV=1	0	99	KEDSCQLGYSAGPCMGMTSR	Carbamidomethyl(C)@5; Carbamidomethyl(C)@14; Oxidation(M)@17	missed K-E@1	-0.0073215	2249.91	750.977	2249.92	750.98	3	22
1	110.11	38.64	P02760	AMBP_HUMAN	Protein AMBP OS=Homo sapiens GN=AMBP PE=1 SV=1	0	99	KEDSCQLGYSAGPCMGMTSR	Carbamidomethyl(C)@5; Oxidation(P)@13; No Carbamidomethyl(C)@14; Dioxidation(M)@15; Oxidation(M)@17	missed K-E@1	-0.00324967	2240.88	747.966	2240.88	747.967	3	19
1	110.11	38.64	P02760	AMBP_HUMAN	Protein AMBP OS=Homo sapiens GN=AMBP PE=1 SV=1	0	99	KEDSCQLGYSAGPCMGMTSR	Carbamidomethyl(C)@5; Carbamidomethyl(C)@14; Oxidation(M)@17	missed K-E@1	-0.00677219	2249.91	750.977	2249.92	750.98	3	20
1	110.11	38.64	P02760	AMBP_HUMAN	Protein AMBP OS=Homo sapiens GN=AMBP PE=1 SV=1	0	99	KEDSCQLGYSAGPCMGMTSR	Carbamidomethyl(C)@5; Carbamidomethyl(C)@14; Oxidation(M)@17	missed K-E@1	-0.00677219	2249.91	750.977	2249.92	750.98	3	19
1	110.11	38.64	P02760	AMBP_HUMAN	Protein AMBP OS=Homo sapiens GN=AMBP PE=1 SV=1	0	99	KEDSCQLGYSAGPCMGMTSR	Delta:H(4)C(2)@N-term; Carbamidomethyl(C)@5; Carbamidomethyl(C)@14; Oxidation(M)@15	missed K-E@1	-0.00831894	2277.94	760.321	2277.95	760.323	3	21
1	110.11	38.64	P02760	AMBP_HUMAN	Protein AMBP OS=Homo sapiens GN=AMBP PE=1 SV=1	0	99	KEDSCQLGYSAGPCMGMTSR	Carbamidomethyl(C)@5; Carbamidomethyl(C)@14; Oxidation(M)@17	missed K-E@1	-0.0073215	2249.91	750.977	2249.92	750.98	3	21
1	110.11	38.64	P02760	AMBP_HUMAN	Protein AMBP OS=Homo sapiens GN=AMBP PE=1 SV=1	0	99	KEDSCQLGYSAGPCMGMTSR	Carbamidomethyl(C)@5; Carbamidomethyl(C)@14; Oxidation(M)@17	missed K-E@1	-0.00201151	2249.92	750.979	2249.92	750.98	3	22
1	110.11	38.64	P02760	AMBP_HUMAN	Protein AMBP OS=Homo sapiens GN=AMBP PE=1 SV=1	0	99	KEDSCQLGYSAGPCMGMTSR	Carbamidomethyl(C)@5; Carbamidomethyl(C)@14; Oxidation(M)@15	missed K-E@1	-0.0012791	2249.92	750.979	2249.92	750.98	3	22
1	110.11	38.64	P02760	AMBP_HUMAN	Protein AMBP OS=Homo sapiens GN=AMBP PE=1 SV=1	0	99	KEDSCQLGYSAGPCMGMTSR	Carbamidomethyl(C)@5; Carbamidomethyl(C)@14	missed K-E@1	-2.01581	2231.91	744.976	2233.92	745.648	3	19
1	110.11	38.64	P02760	AMBP_HUMAN	Protein AMBP OS=Homo sapiens GN=AMBP PE=1 SV=1	0	99	KEDSCQLGYSAGPCMGMTSR	Carbamidomethyl(C)@5; Carbamidomethyl(C)@14; Oxidation(M)@15	missed K-E@1	-0.0076877	2249.91	750.977	2249.92	750.98	3	21
1	110.11	38.64	P02760	AMBP_HUMAN	Protein AMBP OS=Homo sapiens GN=AMBP PE=1 SV=1	0	99	KEDSCQLGYSAGPCMGMTSR	Carbamidomethyl(C)@5; Carbamidomethyl(C)@14	missed K-E@1	-2.01581	2231.91	744.976	2233.92	745.648	3	19
1	110.11	38.64	P02760	AMBP_HUMAN	Protein AMBP OS=Homo sapiens GN=AMBP PE=1 SV=1	0	99	KEDSCQLGYSAGPCMGMTSR	Carbamidomethyl(C)@5; Carbamidomethyl(C)@14; Oxidation(M)@15	missed K-E@1	-0.00201151	2249.92	750.979	2249.92	750.98	3	20
1	110.11	38.64	P02760	AMBP_HUMAN	Protein AMBP OS=Homo sapiens GN=AMBP PE=1 SV=1	0	99	KEDSCQLGYSAGPCMGMTSR	Carbamidomethyl(C)@5; Carbamidomethyl(C)@14	missed K-E@1	0.000880725	2233.92	745.648	2233.92	745.648	3	24
1	110.11	38.64	P02760	AMBP_HUMAN	Protein AMBP OS=Homo sapiens GN=AMBP PE=1 SV=1	0	99	KEDSCQLGYSAGPCMGMTSR	Carbamidomethyl(C)@5; Carbamidomethyl(C)@14; Oxidation(M)@15	missed K-E@1	-0.00201151	2249.92	750.979	2249.92	750.98	3	22
1	110.11	38.64	P02760	AMBP_HUMAN	Protein AMBP OS=Homo sapiens GN=AMBP PE=1 SV=1	0	99	KEDSCQLGYSAGPCMGMTSR	Carbamidomethyl(C)@5; Carbamidomethyl(C)@14	missed K-E@1	0.000880725	2233.92	745.648	2233.92	745.648	3	23
1	110.11	38.64	P02760	AMBP_HUMAN	Protein AMBP OS=Homo sapiens GN=AMBP PE=1 SV=1	0	99	KEDSCQLGYSAGPCMGMTSR	Carbamidomethyl(C)@5; Carbamidomethyl(C)@14	missed K-E@1	0.000880725	2233.92	745.648	2233.92	745.648	3	21
1	110.11	38.64	P02760	AMBP_HUMAN	Protein AMBP OS=Homo sapiens GN=AMBP PE=1 SV=1	0	99	KEDSCQLGYSAGPCMGMTSR	Propionamide(K)@1; No Carbamidomethyl(C)@5; Carbamidomethyl(C)@14	missed K-E@1	-0.00135662	2247.94	750.319	2247.94	750.32	3	18
1	110.11	38.64	P02760	AMBP_HUMAN	Protein AMBP OS=Homo sapiens GN=AMBP PE=1 SV=1	0	99	KEDSCQLGYSAGPCMGMTSR	Carbamidomethyl(C)@5; Pro->pyro-Glu(P)@13; Carbamidomethyl(C)@14; Oxidation(M)@17	missed K-E@1	-0.00379937	2263.89	755.638	2263.9	755.639	3	18
1	110.11	38.64	P02760	AMBP_HUMAN	Protein AMBP OS=Homo sapiens GN=AMBP PE=1 SV=1	0	99	KEDSCQLGYSAGPCMGMTSR	Propionamide@N-term; No Carbamidomethyl(C)@5; Carbamidomethyl(C)@14; Oxidation(M)@15; Oxidation(M)@17	missed K-E@1	0.00196025	2279.93	760.984	2279.93	760.983	3	17
1	110.11	38.64	P02760	AMBP_HUMAN	Protein AMBP OS=Homo sapiens GN=AMBP PE=1 SV=1	0	99	KEDSCQLGYSAGPCMGMTSR	Propionamide@N-term; No Carbamidomethyl(C)@5; Carbamidomethyl(C)@14; Oxidation(M)@15; Oxidation(M)@17	missed K-E@1	-0.00151863	2279.93	760.983	2279.93	760.983	3	19
1	110.11	38.64	P02760	AMBP_HUMAN	Protein AMBP OS=Homo sapiens GN=AMBP PE=1 SV=1	0	99	KEDSCQLGYSAGPCMGMTSR	Carbamidomethyl(C)@5; Amino(Y)@9; Carbamidomethyl(C)@14; Oxidation(M)@15; Oxidation(M)@17	missed K-E@1	0.000936784	2280.92	761.315	2280.92	761.315	3	15
1	110.11	38.64	P02760	AMBP_HUMAN	Protein AMBP OS=Homo sapiens GN=AMBP PE=1 SV=1	0	99	KEDSCQLGYSAGPCMGMTSR	Propionamide(K)@1; No Carbamidomethyl(C)@5; Carbamidomethyl(C)@14; Oxidation(M)@15	missed K-E@1	-0.000635572	2263.93	755.651	2263.93	755.652	3	19
1	110.11	38.64	P02760	AMBP_HUMAN	Protein AMBP OS=Homo sapiens GN=AMBP PE=1 SV=1	0	99	KEDSCQLGYSAGPCMGMTSR	Propionamide(K)@1; No Carbamidomethyl(C)@5; Carbamidomethyl(C)@14	missed K-E@1	0.00226015	2247.94	750.321	2247.94	750.32	3	21
1	110.11	38.64	P02760	AMBP_HUMAN	Protein AMBP OS=Homo sapiens GN=AMBP PE=1 SV=1	0	99	KEDSCQLGYSAGPCMGMTSR	Propionamide@N-term; No Carbamidomethyl(C)@5; Carbamidomethyl(C)@14; Oxidation(M)@15; Oxidation(M)@17	missed K-E@1	0.00469335	2279.93	760.985	2279.93	760.983	3	21
1	110.11	38.64	P02760	AMBP_HUMAN	Protein AMBP OS=Homo sapiens GN=AMBP PE=1 SV=1	0	99	KEDSCQLGYSAGPCMGMTSR	Carbamidomethyl(C)@5; Pro->pyro-Glu(P)@13; Carbamidomethyl(C)@14; Oxidation(M)@15; Oxidation(M)@17	missed K-E@1	0.0368675	2279.93	760.983	2279.89	760.971	3	16
1	110.11	38.64	P02760	AMBP_HUMAN	Protein AMBP OS=Homo sapiens GN=AMBP PE=1 SV=1	0	99	KEDSCQLGYSAGPCMGMTSR	Propionamide(K)@1; No Carbamidomethyl(C)@5; Carbamidomethyl(C)@14; Oxidation(M)@15	missed K-E@1	0.00676542	2263.94	755.654	2263.93	755.652	3	18
1	110.11	38.64	P02760	AMBP_HUMAN	Protein AMBP OS=Homo sapiens GN=AMBP PE=1 SV=1	0	99	KEDSCQLGYSAGPCMGMTSR	Carbamidomethyl(C)@5; Pro->pyro-Glu(P)@13; Carbamidomethyl(C)@14; Oxidation(M)@17	missed K-E@1	0.0431509	2263.94	755.654	2263.9	755.639	3	13
1	110.11	38.64	P02760	AMBP_HUMAN	Protein AMBP OS=Homo sapiens GN=AMBP PE=1 SV=1	0	99	KEDSCQLGYSAGPCMGMTSR	Propionamide(K)@1; No Carbamidomethyl(C)@5; Carbamidomethyl(C)@14; Oxidation(M)@17	missed K-E@1	0.006033	2263.94	755.654	2263.93	755.652	3	18
1	110.11	38.64	P02760	AMBP_HUMAN	Protein AMBP OS=Homo sapiens GN=AMBP PE=1 SV=1	0	99	KEDSCQLGYSAGPCMGMTSR	Carbamidomethyl(C)@5; Pro->pyro-Glu(P)@13; Carbamidomethyl(C)@14	missed K-E@1	0.0439407	2247.95	750.322	2247.9	750.308	3	19
1	110.11	38.64	P02760	AMBP_HUMAN	Protein AMBP OS=Homo sapiens GN=AMBP PE=1 SV=1	0	99	KEDSCQLGYSAGPCMGMTSR	Carbamidomethyl(C)@5; Carbamidomethyl(C)@14; Oxidation(M)@15; Dioxidation(M)@17	missed K-E@1	0.00147305	2281.91	761.644	2281.91	761.643	3	21
1	110.11	38.64	P02760	AMBP_HUMAN	Protein AMBP OS=Homo sapiens GN=AMBP PE=1 SV=1	0	99	KEDSCQLGYSAGPCMGMTSR	Carbamidomethyl(C)@5; Carbamidomethyl(C)@14; Oxidation(M)@15	missed K-E@1	0.000993867	2249.92	563.487	2249.92	563.487	4	17
1	110.11	38.64	P02760	AMBP_HUMAN	Protein AMBP OS=Homo sapiens GN=AMBP PE=1 SV=1	0	99	LVTEVTK		cleaved Q-L@N-term	-0.00146595	788.463	395.239	788.464	395.239	2	5
1	110.11	38.64	P02760	AMBP_HUMAN	Protein AMBP OS=Homo sapiens GN=AMBP PE=1 SV=1	0	99	MGNGNNFVTEK	Oxidation(M)@1; Deamidated(N)@3	cleaved C-M@N-term	-0.00201529	1226.52	614.268	1226.52	614.269	2	14
1	110.11	38.64	P02760	AMBP_HUMAN	Protein AMBP OS=Homo sapiens GN=AMBP PE=1 SV=1	0	99	MGNGNNFVTEK		cleaved C-M@N-term	-0.0046782	1209.54	605.777	1209.54	605.78	2	13
1	110.11	38.64	P02760	AMBP_HUMAN	Protein AMBP OS=Homo sapiens GN=AMBP PE=1 SV=1	0	99	MGNGNNFVTEK	Deamidated(N)@3	cleaved C-M@N-term	-0.00567415	1210.52	606.269	1210.53	606.272	2	13
1	110.11	38.64	P02760	AMBP_HUMAN	Protein AMBP OS=Homo sapiens GN=AMBP PE=1 SV=1	0	99	MGNGNNFVTEK	Deamidated(N)@3	cleaved C-M@N-term	-0.00286657	1210.53	606.27	1210.53	606.272	2	12
1	110.11	38.64	P02760	AMBP_HUMAN	Protein AMBP OS=Homo sapiens GN=AMBP PE=1 SV=1	0	99	NLPIVR		cleaved C-N@N-term	0.00074637	710.445	356.23	710.444	356.229	2	7
1	110.11	38.64	P02760	AMBP_HUMAN	Protein AMBP OS=Homo sapiens GN=AMBP PE=1 SV=1	0	99	NLPIVR		cleaved C-N@N-term	-0.000749263	710.443	356.229	710.444	356.229	2	7
1	110.11	38.64	P02760	AMBP_HUMAN	Protein AMBP OS=Homo sapiens GN=AMBP PE=1 SV=1	0	99	NLPIVR		cleaved C-N@N-term	-0.000138927	710.444	356.229	710.444	356.229	2	7
1	110.11	38.64	P02760	AMBP_HUMAN	Protein AMBP OS=Homo sapiens GN=AMBP PE=1 SV=1	0	99	NLPIVR		cleaved C-N@N-term	0.00187236	710.446	356.23	710.444	356.229	2	7
1	110.11	38.64	P02760	AMBP_HUMAN	Protein AMBP OS=Homo sapiens GN=AMBP PE=1 SV=1	0	99	NLPIVR		cleaved C-N@N-term	0.00205546	710.446	356.23	710.444	356.229	2	6
1	110.11	38.64	P02760	AMBP_HUMAN	Protein AMBP OS=Homo sapiens GN=AMBP PE=1 SV=1	0	99	NLPIVR		cleaved C-N@N-term	0.00187236	710.446	356.23	710.444	356.229	2	6
1	110.11	38.64	P02760	AMBP_HUMAN	Protein AMBP OS=Homo sapiens GN=AMBP PE=1 SV=1	0	99	PGDGDEELLR		cleaved V-P@N-term	0.000584311	1099.52	550.765	1099.51	550.765	2	13
1	110.11	38.64	P02760	AMBP_HUMAN	Protein AMBP OS=Homo sapiens GN=AMBP PE=1 SV=1	0	99	PGDGDEELLR		cleaved V-P@N-term	0.000584311	1099.52	550.765	1099.51	550.765	2	11
1	110.11	38.64	P02760	AMBP_HUMAN	Protein AMBP OS=Homo sapiens GN=AMBP PE=1 SV=1	0	99	PGDGDEELLR		cleaved V-P@N-term	0.000950518	1099.52	550.765	1099.51	550.765	2	12
1	110.11	38.64	P02760	AMBP_HUMAN	Protein AMBP OS=Homo sapiens GN=AMBP PE=1 SV=1	0	99	PGDGDEELLR		cleaved V-P@N-term	0.968102	1100.48	551.249	1099.51	550.765	2	13
1	110.11	38.64	P02760	AMBP_HUMAN	Protein AMBP OS=Homo sapiens GN=AMBP PE=1 SV=1	0	99	PGDGDEELLR		cleaved V-P@N-term	0.968458	1100.48	551.249	1099.51	550.765	2	11
1	110.11	38.64	P02760	AMBP_HUMAN	Protein AMBP OS=Homo sapiens GN=AMBP PE=1 SV=1	0	99	PGDGDEELLR		cleaved V-P@N-term	-0.00103082	1099.51	550.764	1099.51	550.765	2	14
1	110.11	38.64	P02760	AMBP_HUMAN	Protein AMBP OS=Homo sapiens GN=AMBP PE=1 SV=1	0	99	PGDGDEELLR		cleaved V-P@N-term	0.00104431	1099.52	550.765	1099.51	550.765	2	12
1	110.11	38.64	P02760	AMBP_HUMAN	Protein AMBP OS=Homo sapiens GN=AMBP PE=1 SV=1	0	99	PGDGDEELLR		cleaved V-P@N-term	0.967931	1100.48	551.249	1099.51	550.765	2	13
1	110.11	38.64	P02760	AMBP_HUMAN	Protein AMBP OS=Homo sapiens GN=AMBP PE=1 SV=1	0	99	PGDGDEELLR		cleaved V-P@N-term	0.967931	1100.48	551.249	1099.51	550.765	2	11
1	110.11	38.64	P02760	AMBP_HUMAN	Protein AMBP OS=Homo sapiens GN=AMBP PE=1 SV=1	0	99	PGDGDEELLR		cleaved V-P@N-term	0.000222177	1099.51	550.765	1099.51	550.765	2	14
1	110.11	38.64	P02760	AMBP_HUMAN	Protein AMBP OS=Homo sapiens GN=AMBP PE=1 SV=1	0	99	PGDGDEELLR		cleaved V-P@N-term	0.970552	1100.49	551.25	1099.51	550.765	2	13
1	110.11	38.64	P02760	AMBP_HUMAN	Protein AMBP OS=Homo sapiens GN=AMBP PE=1 SV=1	0	99	RRAVLPQEEEGSGGGQLVTEVTK		cleaved V-R@N-term; missed R-R@1; missed R-A@2	-9.00054	2430.27	1216.14	2439.27	1220.64	2	17
1	110.11	38.64	P02760	AMBP_HUMAN	Protein AMBP OS=Homo sapiens GN=AMBP PE=1 SV=1	0	99	RRAVLPQEEEGSGGGQLVTEVTK		cleaved V-R@N-term; missed R-R@1; missed R-A@2	-9.00054	2430.27	1216.14	2439.27	1220.64	2	17
1	110.11	38.64	P02760	AMBP_HUMAN	Protein AMBP OS=Homo sapiens GN=AMBP PE=1 SV=1	0	99	RRAVLPQEEEGSGGGQLVTEVTK		cleaved V-R@N-term; missed R-R@1; missed R-A@2	-9.00054	2430.27	1216.14	2439.27	1220.64	2	17
1	110.11	38.64	P02760	AMBP_HUMAN	Protein AMBP OS=Homo sapiens GN=AMBP PE=1 SV=1	0	99	RRAVLPQEEEGSGGGQLVTEVTK		cleaved V-R@N-term; missed R-R@1; missed R-A@2	-8.9967	2430.28	1216.14	2439.27	1220.64	2	17
1	110.11	38.64	P02760	AMBP_HUMAN	Protein AMBP OS=Homo sapiens GN=AMBP PE=1 SV=1	0	99	RRAVLPQEEEGSGGGQLVTEVTK		cleaved V-R@N-term; missed R-R@1; missed R-A@2	-8.99925	2430.27	1216.14	2439.27	1220.64	2	17
1	110.11	38.64	P02760	AMBP_HUMAN	Protein AMBP OS=Homo sapiens GN=AMBP PE=1 SV=1	0	99	RRAVLPQEEEGSGGGQLVTEVTK		cleaved V-R@N-term; missed R-R@1; missed R-A@2	-8.99925	2430.27	1216.14	2439.27	1220.64	2	17
1	110.11	38.64	P02760	AMBP_HUMAN	Protein AMBP OS=Homo sapiens GN=AMBP PE=1 SV=1	0	99	RRAVLPQEEEGSGGGQLVTEVTK		cleaved V-R@N-term; missed R-R@1; missed R-A@2	-8.99925	2430.27	1216.14	2439.27	1220.64	2	17
1	110.11	38.64	P02760	AMBP_HUMAN	Protein AMBP OS=Homo sapiens GN=AMBP PE=1 SV=1	0	99	RRAVLPQEEEGSGGGQLVTEVTK		cleaved V-R@N-term; missed R-R@1; missed R-A@2	-8.99969	2430.27	1216.14	2439.27	1220.64	2	17
1	110.11	38.64	P02760	AMBP_HUMAN	Protein AMBP OS=Homo sapiens GN=AMBP PE=1 SV=1	0	99	RRAVLPQEEEGSGGGQLVTEVTK		cleaved V-R@N-term; missed R-R@1; missed R-A@2	-8.99969	2430.27	1216.14	2439.27	1220.64	2	18
1	110.11	38.64	P02760	AMBP_HUMAN	Protein AMBP OS=Homo sapiens GN=AMBP PE=1 SV=1	0	99	RRAVLPQEEEGSGGGQLVTEVTK		cleaved V-R@N-term; missed R-R@1; missed R-A@2	-8.99969	2430.27	1216.14	2439.27	1220.64	2	17
1	110.11	38.64	P02760	AMBP_HUMAN	Protein AMBP OS=Homo sapiens GN=AMBP PE=1 SV=1	0	99	RRAVLPQEEEGSGGGQLVTEVTK		cleaved V-R@N-term; missed R-R@1; missed R-A@2	-9.00564	2430.27	1216.14	2439.27	1220.64	2	17
1	110.11	38.64	P02760	AMBP_HUMAN	Protein AMBP OS=Homo sapiens GN=AMBP PE=1 SV=1	0	99	SAGPCMGMTSR	Carbamidomethyl(C)@5; Oxidation(M)@8	cleaved Y-S@N-term	-0.00412689	1169.46	585.737	1169.46	585.739	2	8
1	110.11	38.64	P02760	AMBP_HUMAN	Protein AMBP OS=Homo sapiens GN=AMBP PE=1 SV=1	0	99	SAGPCMGMTSR	Carbamidomethyl(C)@5; Oxidation(M)@8	cleaved Y-S@N-term	-0.00607999	1169.46	585.736	1169.46	585.739	2	9
1	110.11	38.64	P02760	AMBP_HUMAN	Protein AMBP OS=Homo sapiens GN=AMBP PE=1 SV=1	0	99	SAGPCMGMTSR	Carbamidomethyl(C)@5; Oxidation(M)@8	cleaved Y-S@N-term	-0.00485931	1169.46	585.736	1169.46	585.739	2	9
1	110.11	38.64	P02760	AMBP_HUMAN	Protein AMBP OS=Homo sapiens GN=AMBP PE=1 SV=1	0	99	SAGPCMGMTSR	Carbamidomethyl(C)@5	cleaved Y-S@N-term	-0.00803501	1153.46	577.737	1153.47	577.741	2	12
1	110.11	38.64	P02760	AMBP_HUMAN	Protein AMBP OS=Homo sapiens GN=AMBP PE=1 SV=1	0	99	SAGPCMGMTSR	Carbamidomethyl(C)@5	cleaved Y-S@N-term	-0.00534949	1153.46	577.739	1153.47	577.741	2	15
1	110.11	38.64	P02760	AMBP_HUMAN	Protein AMBP OS=Homo sapiens GN=AMBP PE=1 SV=1	0	99	SAGPCMGMTSR	Carbamidomethyl(C)@5	cleaved Y-S@N-term	-0.00534949	1153.46	577.739	1153.47	577.741	2	15
1	110.11	38.64	P02760	AMBP_HUMAN	Protein AMBP OS=Homo sapiens GN=AMBP PE=1 SV=1	0	99	SAGPCMGMTSR	Carbamidomethyl(C)@5	cleaved Y-S@N-term	-0.00803501	1153.46	577.737	1153.47	577.741	2	10
1	110.11	38.64	P02760	AMBP_HUMAN	Protein AMBP OS=Homo sapiens GN=AMBP PE=1 SV=1	0	99	SAGPCMGMTSR	Carbamidomethyl(C)@5	cleaved Y-S@N-term	-0.00211677	1153.47	577.74	1153.47	577.741	2	11
1	110.11	38.64	P02760	AMBP_HUMAN	Protein AMBP OS=Homo sapiens GN=AMBP PE=1 SV=1	0	99	SAGPCMGMTSR	Carbamidomethyl(C)@5	cleaved Y-S@N-term	-0.00162851	1153.47	577.74	1153.47	577.741	2	13
1	110.11	38.64	P02760	AMBP_HUMAN	Protein AMBP OS=Homo sapiens GN=AMBP PE=1 SV=1	0	99	SAGPCMGMTSR	Carbamidomethyl(C)@5	cleaved Y-S@N-term	0.000796379	1153.47	577.742	1153.47	577.741	2	9
1	110.11	38.64	P02760	AMBP_HUMAN	Protein AMBP OS=Homo sapiens GN=AMBP PE=1 SV=1	0	99	SAGPCMGMTSR	Carbamidomethyl(C)@5	cleaved Y-S@N-term	0.00116259	1153.47	577.742	1153.47	577.741	2	12
1	110.11	38.64	P02760	AMBP_HUMAN	Protein AMBP OS=Homo sapiens GN=AMBP PE=1 SV=1	0	99	SAGPCMGMTSR	Carbamidomethyl(C)@5	cleaved Y-S@N-term	-0.000252452	1153.47	577.741	1153.47	577.741	2	11
1	110.11	38.64	P02760	AMBP_HUMAN	Protein AMBP OS=Homo sapiens GN=AMBP PE=1 SV=1	0	99	SAGPCMGMTSR	Carbamidomethyl(C)@5	cleaved Y-S@N-term	-0.00562349	1153.46	577.738	1153.47	577.741	2	13
1	110.11	38.64	P02760	AMBP_HUMAN	Protein AMBP OS=Homo sapiens GN=AMBP PE=1 SV=1	0	99	TVAACNLPIVR	Carbamidomethyl(C)@5		-0.0020702	1212.66	607.339	1212.66	607.34	2	15
1	110.11	38.64	P02760	AMBP_HUMAN	Protein AMBP OS=Homo sapiens GN=AMBP PE=1 SV=1	0	99	TVAACNLPIVR	Carbamidomethyl(C)@5		-0.00231434	1212.66	607.339	1212.66	607.34	2	16
1	110.11	38.64	P02760	AMBP_HUMAN	Protein AMBP OS=Homo sapiens GN=AMBP PE=1 SV=1	0	99	TVAACNLPIVR	Carbamidomethyl(C)@5		-0.00076079	1212.66	607.339	1212.66	607.34	2	12
1	110.11	38.64	P02760	AMBP_HUMAN	Protein AMBP OS=Homo sapiens GN=AMBP PE=1 SV=1	0	99	TVAACNLPIVR	Carbamidomethyl(C)@5		-0.000150443	1212.66	607.34	1212.66	607.34	2	17
1	110.11	38.64	P02760	AMBP_HUMAN	Protein AMBP OS=Homo sapiens GN=AMBP PE=1 SV=1	0	99	TVAACNLPIVR	Carbamidomethyl(C)@5		-0.000150443	1212.66	607.34	1212.66	607.34	2	17
1	110.11	38.64	P02760	AMBP_HUMAN	Protein AMBP OS=Homo sapiens GN=AMBP PE=1 SV=1	0	99	TVAACNLPIVR	Carbamidomethyl(C)@5		-0.000272512	1212.66	607.34	1212.66	607.34	2	17
1	110.11	38.64	P02760	AMBP_HUMAN	Protein AMBP OS=Homo sapiens GN=AMBP PE=1 SV=1	0	99	TVAACNLPIVR	Carbamidomethyl(C)@5		-0.000272512	1212.66	607.34	1212.66	607.34	2	14
1	110.11	38.64	P02760	AMBP_HUMAN	Protein AMBP OS=Homo sapiens GN=AMBP PE=1 SV=1	0	99	TVAACNLPIVR	Carbamidomethyl(C)@5		-0.000247728	1212.66	607.34	1212.66	607.34	2	15
1	110.11	38.64	P02760	AMBP_HUMAN	Protein AMBP OS=Homo sapiens GN=AMBP PE=1 SV=1	0	99	TVAACNLPIVR	Carbamidomethyl(C)@5		0.000362621	1212.67	607.34	1212.66	607.34	2	17
1	110.11	38.64	P02760	AMBP_HUMAN	Protein AMBP OS=Homo sapiens GN=AMBP PE=1 SV=1	0	99	TVAACNLPIVR	Carbamidomethyl(C)@5		0.000240551	1212.67	607.34	1212.66	607.34	2	17
1	110.11	38.64	P02760	AMBP_HUMAN	Protein AMBP OS=Homo sapiens GN=AMBP PE=1 SV=1	0	99	TVAACNLPIVR	Carbamidomethyl(C)@5		0.000240551	1212.67	607.34	1212.66	607.34	2	15
1	110.11	38.64	P02760	AMBP_HUMAN	Protein AMBP OS=Homo sapiens GN=AMBP PE=1 SV=1	0	99	TVAACNLPIVR	Propionamide@N-term; No Carbamidomethyl(C)@5		-0.00287611	1226.68	614.346	1226.68	614.348	2	14
1	110.11	38.64	P02760	AMBP_HUMAN	Protein AMBP OS=Homo sapiens GN=AMBP PE=1 SV=1	0	99	TVAACNLPIVR	No Carbamidomethyl(C)@5		-0.00243122	1155.64	578.828	1155.64	578.829	2	12
1	110.11	38.64	P02760	AMBP_HUMAN	Protein AMBP OS=Homo sapiens GN=AMBP PE=1 SV=1	0	99	TVAACNLPIVR	Propionamide@N-term; No Carbamidomethyl(C)@5		0.0017596	1226.68	614.348	1226.68	614.348	2	11
1	110.11	38.64	P02760	AMBP_HUMAN	Protein AMBP OS=Homo sapiens GN=AMBP PE=1 SV=1	0	99	TVAACNLPIVR	Carbamidomethyl(C)@5		0.000850313	1212.67	607.34	1212.66	607.34	2	16
1	110.11	38.64	P02760	AMBP_HUMAN	Protein AMBP OS=Homo sapiens GN=AMBP PE=1 SV=1	0	99	TVAACNLPIVR	Carbamidomethyl(C)@5		0.000850313	1212.67	607.34	1212.66	607.34	2	17
1	110.11	38.64	P02760	AMBP_HUMAN	Protein AMBP OS=Homo sapiens GN=AMBP PE=1 SV=1	0	99	TVAACNLPIVR	Carbamidomethyl(C)@5		0.000850313	1212.67	607.34	1212.66	607.34	2	17
1	110.11	38.64	P02760	AMBP_HUMAN	Protein AMBP OS=Homo sapiens GN=AMBP PE=1 SV=1	0	99	TVAACNLPIVR	Carbamidomethyl(C)@5		0.00109445	1212.67	607.34	1212.66	607.34	2	16
1	110.11	38.64	P02760	AMBP_HUMAN	Protein AMBP OS=Homo sapiens GN=AMBP PE=1 SV=1	0	99	TVAACNLPIVR	Carbamidomethyl(C)@5		0.000484114	1212.67	607.34	1212.66	607.34	2	16
1	110.11	38.64	P02760	AMBP_HUMAN	Protein AMBP OS=Homo sapiens GN=AMBP PE=1 SV=1	0	99	TVAACNLPIVR	Carbamidomethyl(C)@5		-0.00167875	1212.66	607.339	1212.66	607.34	2	15
1	110.11	38.64	P02760	AMBP_HUMAN	Protein AMBP OS=Homo sapiens GN=AMBP PE=1 SV=1	0	99	TVAACNLPIVR	Carbamidomethyl(C)@5		-0.000702194	1212.66	607.339	1212.66	607.34	2	17
1	110.11	38.64	P02760	AMBP_HUMAN	Protein AMBP OS=Homo sapiens GN=AMBP PE=1 SV=1	0	99	TVAACNLPIVR	Carbamidomethyl(C)@5		-0.000702194	1212.66	607.339	1212.66	607.34	2	17
1	110.11	38.64	P02760	AMBP_HUMAN	Protein AMBP OS=Homo sapiens GN=AMBP PE=1 SV=1	0	99	TVAACNLPIVR	Carbamidomethyl(C)@5		-0.000702194	1212.66	607.339	1212.66	607.34	2	16
1	110.11	38.64	P02760	AMBP_HUMAN	Protein AMBP OS=Homo sapiens GN=AMBP PE=1 SV=1	0	99	TVAACNLPIVR	Carbamidomethyl(C)@5		-0.0010684	1212.66	607.339	1212.66	607.34	2	16
1	110.11	38.64	P02760	AMBP_HUMAN	Protein AMBP OS=Homo sapiens GN=AMBP PE=1 SV=1	0	99	TVAACNLPIVR	Carbamidomethyl(C)@5		-0.00802638	1212.66	607.336	1212.66	607.34	2	13
1	110.11	38.64	P02760	AMBP_HUMAN	Protein AMBP OS=Homo sapiens GN=AMBP PE=1 SV=1	0	99	TVAACNLPIVR	Carbamidomethyl(C)@5; Oxidation(P)@8		-0.0140593	1228.65	615.33	1228.66	615.337	2	10
1	110.11	38.64	P02760	AMBP_HUMAN	Protein AMBP OS=Homo sapiens GN=AMBP PE=1 SV=1	0	99	TVAACNLPIVR	Carbamidomethyl(C)@5; Oxidation(P)@8		-0.00966479	1228.65	615.332	1228.66	615.337	2	11
1	110.11	38.64	P02760	AMBP_HUMAN	Protein AMBP OS=Homo sapiens GN=AMBP PE=1 SV=1	0	99	TVAACNLPIVR	Carbamidomethyl(C)@5; Oxidation(P)@8		-0.00966479	1228.65	615.332	1228.66	615.337	2	12
1	110.11	38.64	P02760	AMBP_HUMAN	Protein AMBP OS=Homo sapiens GN=AMBP PE=1 SV=1	0	99	TVAACNLPIVR	Carbamidomethyl(C)@5; Oxidation(P)@8		-0.00588066	1228.65	615.334	1228.66	615.337	2	11
1	110.11	38.64	P02760	AMBP_HUMAN	Protein AMBP OS=Homo sapiens GN=AMBP PE=1 SV=1	0	99	TVAACNLPIVR	Carbamidomethyl(C)@5; Oxidation(P)@8		-0.00588066	1228.65	615.334	1228.66	615.337	2	11
1	110.11	38.64	P02760	AMBP_HUMAN	Protein AMBP OS=Homo sapiens GN=AMBP PE=1 SV=1	0	99	TVAACNLPIVR	Carbamidomethyl(C)@5; Oxidation(P)@8		-0.00368342	1228.66	615.335	1228.66	615.337	2	10
1	110.11	38.64	P02760	AMBP_HUMAN	Protein AMBP OS=Homo sapiens GN=AMBP PE=1 SV=1	0	99	TVAACNLPIVR	Carbamidomethyl(C)@5; Oxidation(P)@8		-0.00368342	1228.66	615.335	1228.66	615.337	2	11
1	110.11	38.64	P02760	AMBP_HUMAN	Protein AMBP OS=Homo sapiens GN=AMBP PE=1 SV=1	0	99	TVAACNLPIVR	Carbamidomethyl(C)@5; Oxidation(P)@8		-0.00343928	1228.66	615.335	1228.66	615.337	2	11
1	110.11	38.64	P02760	AMBP_HUMAN	Protein AMBP OS=Homo sapiens GN=AMBP PE=1 SV=1	0	99	TVAACNLPIVR	Carbamidomethyl(C)@5; Oxidation(P)@8		0.000344846	1228.66	615.337	1228.66	615.337	2	12
1	110.11	38.64	P02760	AMBP_HUMAN	Protein AMBP OS=Homo sapiens GN=AMBP PE=1 SV=1	0	99	TVAACNLPIVR	Carbamidomethyl(C)@5; Oxidation(P)@8		0.00388484	1228.66	615.339	1228.66	615.337	2	12
1	110.11	38.64	P02760	AMBP_HUMAN	Protein AMBP OS=Homo sapiens GN=AMBP PE=1 SV=1	0	99	TVAACNLPIVR	Propionamide@N-term; No Carbamidomethyl(C)@5		-0.00144412	1226.68	614.347	1226.68	614.348	2	11
1	110.11	38.64	P02760	AMBP_HUMAN	Protein AMBP OS=Homo sapiens GN=AMBP PE=1 SV=1	0	99	TVAACNLPIVR	Carbamidomethyl(C)@5		-0.00331385	1212.66	607.338	1212.66	607.34	2	17
1	110.11	38.64	P02760	AMBP_HUMAN	Protein AMBP OS=Homo sapiens GN=AMBP PE=1 SV=1	0	99	TVAACNLPIVR	Carbamidomethyl@N-term; Carbamidomethyl(C)@5		-0.00256872	1269.68	635.849	1269.69	635.85	2	12
1	110.11	38.64	P02760	AMBP_HUMAN	Protein AMBP OS=Homo sapiens GN=AMBP PE=1 SV=1	0	99	TVAACNLPIVR	Propionamide@N-term; No Carbamidomethyl(C)@5		-0.00156619	1226.68	614.347	1226.68	614.348	2	16
1	110.11	38.64	P02760	AMBP_HUMAN	Protein AMBP OS=Homo sapiens GN=AMBP PE=1 SV=1	0	99	TVAACNLPIVR	Didehydro(T)@1; Carbamidomethyl(C)@5		0.00149776	1210.65	606.333	1210.65	606.332	2	12
1	110.11	38.64	P02760	AMBP_HUMAN	Protein AMBP OS=Homo sapiens GN=AMBP PE=1 SV=1	0	99	TVAACNLPIVR	Propionamide@N-term; No Carbamidomethyl(C)@5		-0.00156619	1226.68	614.347	1226.68	614.348	2	13
1	110.11	38.64	P02760	AMBP_HUMAN	Protein AMBP OS=Homo sapiens GN=AMBP PE=1 SV=1	0	99	TVAACNLPIVR	Didehydro(T)@1; Carbamidomethyl(C)@5		0.00149776	1210.65	606.333	1210.65	606.332	2	13
1	110.11	38.64	P02760	AMBP_HUMAN	Protein AMBP OS=Homo sapiens GN=AMBP PE=1 SV=1	0	99	TVAACNLPIVR	Didehydro(T)@1; Carbamidomethyl(C)@5		0.00149776	1210.65	606.333	1210.65	606.332	2	13
1	110.11	38.64	P02760	AMBP_HUMAN	Protein AMBP OS=Homo sapiens GN=AMBP PE=1 SV=1	0	99	TVAACNLPIVR	No Carbamidomethyl(C)@5		0.00105025	1155.64	578.83	1155.64	578.829	2	13
1	110.11	38.64	P02760	AMBP_HUMAN	Protein AMBP OS=Homo sapiens GN=AMBP PE=1 SV=1	0	99	TVAACNLPIVR	No Carbamidomethyl(C)@5		0.00105025	1155.64	578.83	1155.64	578.829	2	11
1	110.11	38.64	P02760	AMBP_HUMAN	Protein AMBP OS=Homo sapiens GN=AMBP PE=1 SV=1	0	99	TVAACNLPIVR	Formyl@N-term; Carbamidomethyl(C)@5		0.00031151	1240.66	621.337	1240.66	621.337	2	9
1	110.11	38.64	P02760	AMBP_HUMAN	Protein AMBP OS=Homo sapiens GN=AMBP PE=1 SV=1	0	99	TVAACNLPIVR	Carbamidomethyl(C)@5		-0.00119933	1212.66	607.339	1212.66	607.34	2	15
1	110.11	38.64	P02760	AMBP_HUMAN	Protein AMBP OS=Homo sapiens GN=AMBP PE=1 SV=1	0	99	TVAACNLPIVR	Carbamidomethyl(C)@5		0.000997902	1212.67	607.34	1212.66	607.34	2	17
1	110.11	38.64	P02760	AMBP_HUMAN	Protein AMBP OS=Homo sapiens GN=AMBP PE=1 SV=1	0	99	TVAACNLPIVR	Carbamidomethyl(C)@5		0.000997902	1212.67	607.34	1212.66	607.34	2	17
1	110.11	38.64	P02760	AMBP_HUMAN	Protein AMBP OS=Homo sapiens GN=AMBP PE=1 SV=1	0	99	TVAACNLPIVR	Carbamidomethyl(C)@5		-0.00388483	1212.66	607.338	1212.66	607.34	2	15
1	110.11	38.64	P02760	AMBP_HUMAN	Protein AMBP OS=Homo sapiens GN=AMBP PE=1 SV=1	0	99	TVAACNLPIVR	Propionamide@N-term; No Carbamidomethyl(C)@5		-0.00219332	1226.68	614.346	1226.68	614.348	2	13
1	110.11	38.64	P02760	AMBP_HUMAN	Protein AMBP OS=Homo sapiens GN=AMBP PE=1 SV=1	0	99	TVAACNLPIVR	No Carbamidomethyl(C)@5		0.000216423	1155.64	578.829	1155.64	578.829	2	11
1	110.11	38.64	P02760	AMBP_HUMAN	Protein AMBP OS=Homo sapiens GN=AMBP PE=1 SV=1	0	99	TVAACNLPIVR	No Carbamidomethyl(C)@5		0.000216423	1155.64	578.829	1155.64	578.829	2	14
1	110.11	38.64	P02760	AMBP_HUMAN	Protein AMBP OS=Homo sapiens GN=AMBP PE=1 SV=1	0	99	TVAACNLPIVR	Carbamidomethyl(C)@5		-4.26059e-05	1212.66	607.34	1212.66	607.34	2	13
1	110.11	38.64	P02760	AMBP_HUMAN	Protein AMBP OS=Homo sapiens GN=AMBP PE=1 SV=1	0	99	TVAACNLPIVR	Carbamidomethyl(C)@5		-0.000897093	1212.66	607.339	1212.66	607.34	2	17
1	110.11	38.64	P02760	AMBP_HUMAN	Protein AMBP OS=Homo sapiens GN=AMBP PE=1 SV=1	0	99	TVAACNLPIVR	Carbamidomethyl(C)@5		-0.000652954	1212.66	607.339	1212.66	607.34	2	16
1	110.11	38.64	P02760	AMBP_HUMAN	Protein AMBP OS=Homo sapiens GN=AMBP PE=1 SV=1	0	99	TVAACNLPIVR	Carbamidomethyl(C)@5		0.000116582	1212.67	607.34	1212.66	607.34	2	14
1	110.11	38.64	P02760	AMBP_HUMAN	Protein AMBP OS=Homo sapiens GN=AMBP PE=1 SV=1	0	99	TVAACNLPIVR	Carbamidomethyl(C)@5		0.00023865	1212.67	607.34	1212.66	607.34	2	17
1	110.11	38.64	P02760	AMBP_HUMAN	Protein AMBP OS=Homo sapiens GN=AMBP PE=1 SV=1	0	99	TVAACNLPIVR	Carbamidomethyl(C)@5		0.000116582	1212.67	607.34	1212.66	607.34	2	16
1	110.11	38.64	P02760	AMBP_HUMAN	Protein AMBP OS=Homo sapiens GN=AMBP PE=1 SV=1	0	99	TVAACNLPIVR	Carbamidomethyl(C)@5		-0.00037169	1212.66	607.34	1212.66	607.34	2	13
1	110.11	38.64	P02760	AMBP_HUMAN	Protein AMBP OS=Homo sapiens GN=AMBP PE=1 SV=1	0	99	TVAACNLPIVR	Carbamidomethyl(C)@5		0.00241004	1212.67	607.341	1212.66	607.34	2	13
1	110.11	38.64	P02760	AMBP_HUMAN	Protein AMBP OS=Homo sapiens GN=AMBP PE=1 SV=1	0	99	TVAACNLPIVR	Carbamidomethyl(C)@5		-0.000641693	1212.66	607.339	1212.66	607.34	2	16
1	110.11	38.64	P02760	AMBP_HUMAN	Protein AMBP OS=Homo sapiens GN=AMBP PE=1 SV=1	0	99	TVAACNLPIVR	Carbamidomethyl(C)@5		-0.00125204	1212.66	607.339	1212.66	607.34	2	12
1	110.11	38.64	P02760	AMBP_HUMAN	Protein AMBP OS=Homo sapiens GN=AMBP PE=1 SV=1	0	99	TVAACNLPIVR	Carbamidomethyl(C)@5		0.00167527	1212.67	607.341	1212.66	607.34	2	17
1	110.11	38.64	P02760	AMBP_HUMAN	Protein AMBP OS=Homo sapiens GN=AMBP PE=1 SV=1	0	99	TVAACNLPIVR	Carbamidomethyl(C)@5		-0.00182606	1212.66	607.339	1212.66	607.34	2	12
1	110.11	38.64	P02760	AMBP_HUMAN	Protein AMBP OS=Homo sapiens GN=AMBP PE=1 SV=1	0	99	TVAACNLPIVR	Carbamidomethyl(C)@5		-0.000277602	1212.66	607.34	1212.66	607.34	2	14
1	110.11	38.64	P02760	AMBP_HUMAN	Protein AMBP OS=Homo sapiens GN=AMBP PE=1 SV=1	0	99	TVAACNLPIVR	Propionamide@N-term; No Carbamidomethyl(C)@5		-0.00246552	1226.68	614.346	1226.68	614.348	2	15
1	110.11	38.64	P02760	AMBP_HUMAN	Protein AMBP OS=Homo sapiens GN=AMBP PE=1 SV=1	0	99	TVAACNLPIVR	Propionamide@N-term; No Carbamidomethyl(C)@5		-0.00270965	1226.68	614.346	1226.68	614.348	2	14
1	110.11	38.64	P02760	AMBP_HUMAN	Protein AMBP OS=Homo sapiens GN=AMBP PE=1 SV=1	0	99	TVAACNLPIVR	Didehydro(T)@1; Carbamidomethyl(C)@5		0.000822625	1210.65	606.332	1210.65	606.332	2	12
1	110.11	38.64	P02760	AMBP_HUMAN	Protein AMBP OS=Homo sapiens GN=AMBP PE=1 SV=1	0	99	TVAACNLPIVR	No Carbamidomethyl(C)@5		8.64663e-05	1155.64	578.829	1155.64	578.829	2	13
1	110.11	38.64	P02760	AMBP_HUMAN	Protein AMBP OS=Homo sapiens GN=AMBP PE=1 SV=1	0	99	TVAACNLPIVR	No Carbamidomethyl(C)@5		8.64663e-05	1155.64	578.829	1155.64	578.829	2	15
1	110.11	38.64	P02760	AMBP_HUMAN	Protein AMBP OS=Homo sapiens GN=AMBP PE=1 SV=1	0	99	TVAACNLPIVR	Carbamidomethyl(C)@5		-0.0015195	1212.66	607.339	1212.66	607.34	2	16
1	110.11	38.64	P02760	AMBP_HUMAN	Protein AMBP OS=Homo sapiens GN=AMBP PE=1 SV=1	0	99	TVAACNLPIVR	Carbamidomethyl(C)@5		-0.000909151	1212.66	607.339	1212.66	607.34	2	17
1	110.11	38.64	P02760	AMBP_HUMAN	Protein AMBP OS=Homo sapiens GN=AMBP PE=1 SV=1	0	99	TVAACNLPIVR	Carbamidomethyl(C)@5		0.000555677	1212.67	607.34	1212.66	607.34	2	15
1	110.11	38.64	P02760	AMBP_HUMAN	Protein AMBP OS=Homo sapiens GN=AMBP PE=1 SV=1	0	99	TVAACNLPIVR	Carbamidomethyl(C)@5; Deamidated(N)@6		0.00249128	1213.65	607.833	1213.65	607.832	2	15
1	110.11	38.64	P02760	AMBP_HUMAN	Protein AMBP OS=Homo sapiens GN=AMBP PE=1 SV=1	0	99	TVAACNLPIVR	Carbamidomethyl(C)@5		-0.00143461	1212.66	607.339	1212.66	607.34	2	15
1	110.11	38.64	P02760	AMBP_HUMAN	Protein AMBP OS=Homo sapiens GN=AMBP PE=1 SV=1	0	99	TVAACNLPIVR	Carbamidomethyl(C)@5		0.00137299	1212.67	607.34	1212.66	607.34	2	13
1	110.11	38.64	P02760	AMBP_HUMAN	Protein AMBP OS=Homo sapiens GN=AMBP PE=1 SV=1	0	99	TVAACNLPIVR	Carbamidomethyl(C)@5		-0.00319178	1212.66	607.338	1212.66	607.34	2	17
1	110.11	38.64	P02760	AMBP_HUMAN	Protein AMBP OS=Homo sapiens GN=AMBP PE=1 SV=1	0	99	TVAACNLPIVR	Carbamidomethyl(C)@5		-0.00319178	1212.66	607.338	1212.66	607.34	2	17
1	110.11	38.64	P02760	AMBP_HUMAN	Protein AMBP OS=Homo sapiens GN=AMBP PE=1 SV=1	0	99	TVAACNLPIVR	Carbamidomethyl(C)@5		-0.00319178	1212.66	607.338	1212.66	607.34	2	17
1	110.11	38.64	P02760	AMBP_HUMAN	Protein AMBP OS=Homo sapiens GN=AMBP PE=1 SV=1	0	99	TVAACNLPIVR	Carbamidomethyl(C)@5		-0.00319178	1212.66	607.338	1212.66	607.34	2	17
1	110.11	38.64	P02760	AMBP_HUMAN	Protein AMBP OS=Homo sapiens GN=AMBP PE=1 SV=1	0	99	TVAACNLPIVR	Carbamidomethyl(C)@5		-0.00331385	1212.66	607.338	1212.66	607.34	2	17
1	110.11	38.64	P02760	AMBP_HUMAN	Protein AMBP OS=Homo sapiens GN=AMBP PE=1 SV=1	0	99	TVAACNLPIVR	Carbamidomethyl(C)@5		-0.00355798	1212.66	607.338	1212.66	607.34	2	17
1	110.11	38.64	P02760	AMBP_HUMAN	Protein AMBP OS=Homo sapiens GN=AMBP PE=1 SV=1	0	99	TVAACNLPIVR	Carbamidomethyl(C)@5		-0.00355798	1212.66	607.338	1212.66	607.34	2	17
1	110.11	38.64	P02760	AMBP_HUMAN	Protein AMBP OS=Homo sapiens GN=AMBP PE=1 SV=1	0	99	TVAACNLPIVR	Propionamide@N-term; No Carbamidomethyl(C)@5		0.00274341	1226.68	614.349	1226.68	614.348	2	10
1	110.11	38.64	P02760	AMBP_HUMAN	Protein AMBP OS=Homo sapiens GN=AMBP PE=1 SV=1	0	99	TVAACNLPIVR	No Carbamidomethyl(C)@5		-0.000986618	1155.64	578.828	1155.64	578.829	2	11
1	110.11	38.64	P02760	AMBP_HUMAN	Protein AMBP OS=Homo sapiens GN=AMBP PE=1 SV=1	0	99	TVAACNLPIVR	No Carbamidomethyl(C)@5		-0.000742482	1155.64	578.829	1155.64	578.829	2	13
1	110.11	38.64	P02760	AMBP_HUMAN	Protein AMBP OS=Homo sapiens GN=AMBP PE=1 SV=1	0	99	TVAACNLPIVR	Carbamidomethyl(C)@5		-0.00149855	1212.66	607.339	1212.66	607.34	2	16
1	110.11	38.64	P02760	AMBP_HUMAN	Protein AMBP OS=Homo sapiens GN=AMBP PE=1 SV=1	0	99	TVAACNLPIVR	Carbamidomethyl(C)@5		-0.000665013	1212.66	607.339	1212.66	607.34	2	17
1	110.11	38.64	P02760	AMBP_HUMAN	Protein AMBP OS=Homo sapiens GN=AMBP PE=1 SV=1	0	99	TVAACNLPIVR	Carbamidomethyl(C)@5		-0.000665013	1212.66	607.339	1212.66	607.34	2	17
1	110.11	38.64	P02760	AMBP_HUMAN	Protein AMBP OS=Homo sapiens GN=AMBP PE=1 SV=1	0	99	TVAACNLPIVR	Carbamidomethyl(C)@5		-0.000909151	1212.66	607.339	1212.66	607.34	2	17
1	110.11	38.64	P02760	AMBP_HUMAN	Protein AMBP OS=Homo sapiens GN=AMBP PE=1 SV=1	0	99	TVAACNLPIVR	Carbamidomethyl(C)@5		-0.0015195	1212.66	607.339	1212.66	607.34	2	16
1	110.11	38.64	P02760	AMBP_HUMAN	Protein AMBP OS=Homo sapiens GN=AMBP PE=1 SV=1	0	99	TVAACNLPIVR	Carbamidomethyl(C)@5		-0.0018857	1212.66	607.339	1212.66	607.34	2	15
1	110.11	38.64	P02760	AMBP_HUMAN	Protein AMBP OS=Homo sapiens GN=AMBP PE=1 SV=1	0	99	TVAACNLPIVR	Carbamidomethyl(C)@5		-0.00380212	1212.66	607.338	1212.66	607.34	2	17
1	110.11	38.64	P02760	AMBP_HUMAN	Protein AMBP OS=Homo sapiens GN=AMBP PE=1 SV=1	0	99	TVAACNLPIVR	Carbamidomethyl(C)@5		-0.00186476	1212.66	607.339	1212.66	607.34	2	15
1	110.11	38.64	P02760	AMBP_HUMAN	Protein AMBP OS=Homo sapiens GN=AMBP PE=1 SV=1	0	99	TVAACNLPIVR	Propionamide@N-term; No Carbamidomethyl(C)@5		-0.000525335	1226.68	614.347	1226.68	614.348	2	13
1	110.11	38.64	P02760	AMBP_HUMAN	Protein AMBP OS=Homo sapiens GN=AMBP PE=1 SV=1	0	99	TVAACNLPIVR	Propionamide@N-term; No Carbamidomethyl(C)@5		-0.000525335	1226.68	614.347	1226.68	614.348	2	14
1	110.11	38.64	P02760	AMBP_HUMAN	Protein AMBP OS=Homo sapiens GN=AMBP PE=1 SV=1	0	99	TVAACNLPIVR	Didehydro(T)@1; Carbamidomethyl(C)@5		-0.000598528	1210.65	606.332	1210.65	606.332	2	11
1	110.11	38.64	P02760	AMBP_HUMAN	Protein AMBP OS=Homo sapiens GN=AMBP PE=1 SV=1	0	99	TVAACNLPIVR	No Carbamidomethyl(C)@5		0.00110414	1155.64	578.83	1155.64	578.829	2	13
1	110.11	38.64	P02760	AMBP_HUMAN	Protein AMBP OS=Homo sapiens GN=AMBP PE=1 SV=1	0	99	TVAACNLPIVR	No Carbamidomethyl(C)@5		0.00342346	1155.65	578.831	1155.64	578.829	2	15
1	110.11	38.64	P02760	AMBP_HUMAN	Protein AMBP OS=Homo sapiens GN=AMBP PE=1 SV=1	0	99	TVAACNLPIVR	Propionamide@N-term; No Carbamidomethyl(C)@5		0.00110995	1226.68	614.348	1226.68	614.348	2	12
1	110.11	38.64	P02760	AMBP_HUMAN	Protein AMBP OS=Homo sapiens GN=AMBP PE=1 SV=1	0	99	TVAACNLPIVR	Didehydro(T)@1; Carbamidomethyl(C)@5		-0.00159456	1210.65	606.331	1210.65	606.332	2	11
1	110.11	38.64	P02760	AMBP_HUMAN	Protein AMBP OS=Homo sapiens GN=AMBP PE=1 SV=1	0	99	TVAACNLPIVR	Carbamidomethyl(C)@5		-0.00099454	1212.66	607.339	1212.66	607.34	2	16
1	110.11	38.64	P02760	AMBP_HUMAN	Protein AMBP OS=Homo sapiens GN=AMBP PE=1 SV=1	0	99	TVAACNLPIVR	Carbamidomethyl(C)@5		0.00181304	1212.67	607.341	1212.66	607.34	2	16
1	110.11	38.64	P02760	AMBP_HUMAN	Protein AMBP OS=Homo sapiens GN=AMBP PE=1 SV=1	0	99	TVAACNLPIVR	Carbamidomethyl(C)@5		-0.00554777	1212.66	607.337	1212.66	607.34	2	12
1	110.11	38.64	P02760	AMBP_HUMAN	Protein AMBP OS=Homo sapiens GN=AMBP PE=1 SV=1	0	99	TVAACNLPIVR	Carbamidomethyl(C)@5; Oxidation(P)@8		-0.00515378	1228.65	615.335	1228.66	615.337	2	8
1	110.11	38.64	P02760	AMBP_HUMAN	Protein AMBP OS=Homo sapiens GN=AMBP PE=1 SV=1	0	99	TVAACNLPIVR	Carbamidomethyl(C)@5		-0.00283912	1212.66	405.228	1212.66	405.229	3	13
1	110.11	38.64	P02760	AMBP_HUMAN	Protein AMBP OS=Homo sapiens GN=AMBP PE=1 SV=1	0	99	TVAACNLPIVR	Carbamidomethyl(C)@5		-3.34633e-05	1212.66	607.34	1212.66	607.34	2	17
1	110.11	38.64	P02760	AMBP_HUMAN	Protein AMBP OS=Homo sapiens GN=AMBP PE=1 SV=1	0	99	TVAACNLPIVR	Carbamidomethyl(C)@5		-0.00331385	1212.66	607.338	1212.66	607.34	2	15
1	110.11	38.64	P02760	AMBP_HUMAN	Protein AMBP OS=Homo sapiens GN=AMBP PE=1 SV=1	0	99	TVAACNLPIVR	Carbamidomethyl(C)@5		-0.00392419	1212.66	607.338	1212.66	607.34	2	15
1	110.11	38.64	P02760	AMBP_HUMAN	Protein AMBP OS=Homo sapiens GN=AMBP PE=1 SV=1	0	99	TVAACNLPIVR	Carbamidomethyl(C)@5		-0.00099454	1212.66	607.339	1212.66	607.34	2	13
1	110.11	38.64	P02760	AMBP_HUMAN	Protein AMBP OS=Homo sapiens GN=AMBP PE=1 SV=1	0	99	TVAACNLPIVR	Carbamidomethyl(C)@5; Deamidated(N)@6		0.00913766	1213.66	405.56	1213.65	405.557	3	13
1	110.11	38.64	P02760	AMBP_HUMAN	Protein AMBP OS=Homo sapiens GN=AMBP PE=1 SV=1	0	99	TVAACNLPIVR	Carbamidomethyl(C)@5		-0.00319178	1212.66	607.338	1212.66	607.34	2	14
1	110.11	38.64	P02760	AMBP_HUMAN	Protein AMBP OS=Homo sapiens GN=AMBP PE=1 SV=1	0	99	TVAACNLPIVR	Carbamidomethyl(C)@5		-0.00453453	1212.66	607.337	1212.66	607.34	2	14
1	110.11	38.64	P02760	AMBP_HUMAN	Protein AMBP OS=Homo sapiens GN=AMBP PE=1 SV=1	0	99	TVAACNLPIVR	Carbamidomethyl(C)@5		0.00181304	1212.67	607.341	1212.66	607.34	2	12
1	110.11	38.64	P02760	AMBP_HUMAN	Protein AMBP OS=Homo sapiens GN=AMBP PE=1 SV=1	0	99	TVAACNLPIVR	Carbamidomethyl(C)@5		-0.00355798	1212.66	607.338	1212.66	607.34	2	14
1	110.11	38.64	P02760	AMBP_HUMAN	Protein AMBP OS=Homo sapiens GN=AMBP PE=1 SV=1	0	99	TVAACNLPIVR	Carbamidomethyl(C)@5		0.0054751	1212.67	607.342	1212.66	607.34	2	14
1	110.11	38.64	P02760	AMBP_HUMAN	Protein AMBP OS=Homo sapiens GN=AMBP PE=1 SV=1	0	99	VAACNLPIVR	Carbamidomethyl@N-term; Carbamidomethyl(C)@4	cleaved T-V@N-term	-0.00778943	1168.63	585.323	1168.64	585.327	2	11
1	110.11	38.64	P02760	AMBP_HUMAN	Protein AMBP OS=Homo sapiens GN=AMBP PE=1 SV=1	0	99	VAACNLPIVR	Carbamidomethyl@N-term; Carbamidomethyl(C)@4	cleaved T-V@N-term	-0.00754529	1168.63	585.323	1168.64	585.327	2	15
1	110.11	38.64	P02760	AMBP_HUMAN	Protein AMBP OS=Homo sapiens GN=AMBP PE=1 SV=1	0	99	VAACNLPIVR	Carbamidomethyl@N-term; Carbamidomethyl(C)@4	cleaved T-V@N-term	-0.00815563	1168.63	585.322	1168.64	585.327	2	13
1	110.11	38.64	P02760	AMBP_HUMAN	Protein AMBP OS=Homo sapiens GN=AMBP PE=1 SV=1	0	99	VAACNLPIVR	Carbamidomethyl@N-term; Carbamidomethyl(C)@4	cleaved T-V@N-term	-0.000850714	1168.64	585.326	1168.64	585.327	2	12
1	110.11	38.64	P02760	AMBP_HUMAN	Protein AMBP OS=Homo sapiens GN=AMBP PE=1 SV=1	0	99	VAACNLPIVR	Carbamidomethyl@N-term; Carbamidomethyl(C)@4	cleaved T-V@N-term	-0.000850714	1168.64	585.326	1168.64	585.327	2	12
1	110.11	38.64	P02760	AMBP_HUMAN	Protein AMBP OS=Homo sapiens GN=AMBP PE=1 SV=1	0	99	VAACNLPIVR	Carbamidomethyl@N-term; Carbamidomethyl(C)@4	cleaved T-V@N-term	0.00160955	1168.64	585.327	1168.64	585.327	2	14
1	110.11	38.64	P02760	AMBP_HUMAN	Protein AMBP OS=Homo sapiens GN=AMBP PE=1 SV=1	0	99	VAACNLPIVR	Carbamidomethyl@N-term; Carbamidomethyl(C)@4	cleaved T-V@N-term	0.00160955	1168.64	585.327	1168.64	585.327	2	13
1	110.11	38.64	P02760	AMBP_HUMAN	Protein AMBP OS=Homo sapiens GN=AMBP PE=1 SV=1	0	99	WAFDAVK		cleaved L-W@N-term	0.00183118	835.425	418.72	835.423	418.719	2	8
1	110.11	38.64	P02760	AMBP_HUMAN	Protein AMBP OS=Homo sapiens GN=AMBP PE=1 SV=1	0	99	WAFDAVK		cleaved L-W@N-term	0.00183118	835.425	418.72	835.423	418.719	2	10
1	110.11	38.64	P02760	AMBP_HUMAN	Protein AMBP OS=Homo sapiens GN=AMBP PE=1 SV=1	0	99	WAFDAVK		cleaved L-W@N-term	0.000264002	835.423	418.719	835.423	418.719	2	8
1	110.11	38.64	P02760	AMBP_HUMAN	Protein AMBP OS=Homo sapiens GN=AMBP PE=1 SV=1	0	99	WAFDAVK		cleaved L-W@N-term	0.000306725	835.423	418.719	835.423	418.719	2	8
1	110.11	38.64	P02760	AMBP_HUMAN	Protein AMBP OS=Homo sapiens GN=AMBP PE=1 SV=1	0	99	WAFDAVK		cleaved L-W@N-term	0.000489825	835.423	418.719	835.423	418.719	2	10
1	110.11	38.64	P02760	AMBP_HUMAN	Protein AMBP OS=Homo sapiens GN=AMBP PE=1 SV=1	0	99	WAFDAVK		cleaved L-W@N-term	-0.00126418	835.422	418.718	835.423	418.719	2	9
1	110.11	38.64	P02760	AMBP_HUMAN	Protein AMBP OS=Homo sapiens GN=AMBP PE=1 SV=1	0	99	WAFDAVK		cleaved L-W@N-term	-0.00242554	835.42	418.717	835.423	418.719	2	9
1	110.11	38.64	P02760	AMBP_HUMAN	Protein AMBP OS=Homo sapiens GN=AMBP PE=1 SV=1	0	99	WAFDAVK		cleaved L-W@N-term	-0.00224244	835.421	418.718	835.423	418.719	2	8
1	110.11	38.64	P02760	AMBP_HUMAN	Protein AMBP OS=Homo sapiens GN=AMBP PE=1 SV=1	0	99	WAFDAVK		cleaved L-W@N-term	0.0030153	835.426	418.72	835.423	418.719	2	8
1	110.11	38.64	P02760	AMBP_HUMAN	Protein AMBP OS=Homo sapiens GN=AMBP PE=1 SV=1	0	99	WAFDAVK		cleaved L-W@N-term	0.00277116	835.426	418.72	835.423	418.719	2	10
1	110.11	38.64	P02760	AMBP_HUMAN	Protein AMBP OS=Homo sapiens GN=AMBP PE=1 SV=1	0	99	WAFDAVK		cleaved L-W@N-term	0.0013563	835.424	418.719	835.423	418.719	2	8
1	110.11	38.64	P02760	AMBP_HUMAN	Protein AMBP OS=Homo sapiens GN=AMBP PE=1 SV=1	0	99	YSEKECREYCGVPGDGDEELLR	Carbamidomethyl(C)@6; Amino(Y)@9; Carbamidomethyl(C)@10; Oxidation(P)@13	cleaved F-Y@N-term; missed K-E@4; missed R-E@7	0.0125051	2691.17	673.799	2691.15	673.796	4	15
1	110.11	38.64	P02760	AMBP_HUMAN	Protein AMBP OS=Homo sapiens GN=AMBP PE=1 SV=1	0	99	YSEKECREYCGVPGDGDEELLR	Carbamidomethyl(C)@6; Amino(Y)@9; Carbamidomethyl(C)@10; Oxidation(P)@13	cleaved F-Y@N-term; missed K-E@4; missed R-E@7	0.0125051	2691.17	673.799	2691.15	673.796	4	15
1	110.11	38.64	P02760	AMBP_HUMAN	Protein AMBP OS=Homo sapiens GN=AMBP PE=1 SV=1	0	99	YSEKECREYCGVPGDGDEELLR	Carbamidomethyl(C)@6; Amino(Y)@9; Carbamidomethyl(C)@10; Oxidation(P)@13	cleaved F-Y@N-term; missed K-E@4; missed R-E@7	0.0189911	2691.17	673.801	2691.15	673.796	4	15
1	110.11	38.64	P02760	AMBP_HUMAN	Protein AMBP OS=Homo sapiens GN=AMBP PE=1 SV=1	0	99	YSEKECREYCGVPGDGDEELLR	Carbamidomethyl(C)@6; Amino(Y)@9; Carbamidomethyl(C)@10; Oxidation(P)@13	cleaved F-Y@N-term; missed K-E@4; missed R-E@7	0.0189911	2691.17	673.801	2691.15	673.796	4	15
1	110.11	38.64	P02760	AMBP_HUMAN	Protein AMBP OS=Homo sapiens GN=AMBP PE=1 SV=1	0	98.94	TVAACNLPIVR	Carbamidomethyl(C)@5; Deamidated(N)@6		-0.000159477	1213.65	607.832	1213.65	607.832	2	14
1	110.11	38.64	P02760	AMBP_HUMAN	Protein AMBP OS=Homo sapiens GN=AMBP PE=1 SV=1	0	98.87	EYCGVPGDGDEELLR	Glu->pyro-Glu@N-term; Carbamidomethyl(C)@3		0.00479411	1689.74	564.252	1689.73	564.251	3	12
1	110.11	38.64	P02760	AMBP_HUMAN	Protein AMBP OS=Homo sapiens GN=AMBP PE=1 SV=1	0	98.73	EYCGVPGDGDEELL	Carbamidomethyl(C)@3	cleaved L-R@C-term	-0.000699907	1551.64	776.827	1551.64	776.827	2	9
1	110.11	38.64	P02760	AMBP_HUMAN	Protein AMBP OS=Homo sapiens GN=AMBP PE=1 SV=1	0	98.72	EYCGVPGDGDEELLR	Glu->pyro-Glu@N-term; Carbamidomethyl(C)@3		-0.000515885	1689.73	564.251	1689.73	564.251	3	14
1	110.11	38.64	P02760	AMBP_HUMAN	Protein AMBP OS=Homo sapiens GN=AMBP PE=1 SV=1	1.88606	98.71	ETLLQDFR			-0.00301143	1020.52	511.268	1020.52	511.269	2	7
1	110.11	38.64	P02760	AMBP_HUMAN	Protein AMBP OS=Homo sapiens GN=AMBP PE=1 SV=1	0	98.62	TVAACNLPIVR	Carbamidomethyl(C)@5		-0.00113209	1212.66	607.339	1212.66	607.34	2	16
1	110.11	38.64	P02760	AMBP_HUMAN	Protein AMBP OS=Homo sapiens GN=AMBP PE=1 SV=1	0	98.62	TVAACNLPIVR	Carbamidomethyl(C)@5		-0.000643809	1212.66	607.339	1212.66	607.34	2	16
1	110.11	38.64	P02760	AMBP_HUMAN	Protein AMBP OS=Homo sapiens GN=AMBP PE=1 SV=1	0	98.22	EDSCQLGYSAGPCMGMTSR	Cation:Na(D)@2; Carbamidomethyl(C)@4; Carbamidomethyl(C)@13; Oxidation(M)@14; Oxidation(M)@16		0.00135968	2159.8	720.941	2159.8	720.94	3	12
1	110.11	38.64	P02760	AMBP_HUMAN	Protein AMBP OS=Homo sapiens GN=AMBP PE=1 SV=1	0	98.22	KEDSCQLGY	Carbamidomethyl(C)@5	cleaved Y-S@C-term; missed K-E@1	0.000145261	1098.47	550.24	1098.47	550.24	2	8
1	110.11	38.64	P02760	AMBP_HUMAN	Protein AMBP OS=Homo sapiens GN=AMBP PE=1 SV=1	0	98.22	WAFDAVK		cleaved L-W@N-term	0.00117319	835.424	418.719	835.423	418.719	2	7
1	110.11	38.64	P02760	AMBP_HUMAN	Protein AMBP OS=Homo sapiens GN=AMBP PE=1 SV=1	0	97.87	TVAACNLPIVR	Carbamidomethyl(C)@5		0.0109852	1212.68	405.233	1212.66	405.229	3	11
1	110.11	38.64	P02760	AMBP_HUMAN	Protein AMBP OS=Homo sapiens GN=AMBP PE=1 SV=1	0	97.73	CVLFPYGGCQGNGNK	Carbamidomethyl(C)@1; Carbamidomethyl(C)@9; Deamidated(N)@14		0.00545025	1670.72	836.369	1670.72	836.366	2	11
1	110.11	38.64	P02760	AMBP_HUMAN	Protein AMBP OS=Homo sapiens GN=AMBP PE=1 SV=1	0	97.73	TVAACNLPIVR	Carbamidomethyl(C)@5		-0.00613499	1212.66	405.227	1212.66	405.229	3	11
1	110.11	38.64	P02760	AMBP_HUMAN	Protein AMBP OS=Homo sapiens GN=AMBP PE=1 SV=1	0	97.57	TVAACNLPIVR	Carbamidomethyl(C)@5		-0.000384196	1212.66	607.34	1212.66	607.34	2	12
1	110.11	38.64	P02760	AMBP_HUMAN	Protein AMBP OS=Homo sapiens GN=AMBP PE=1 SV=1	0	97.49	EYCGVPGDGDEEL	Carbamidomethyl(C)@3	cleaved L-L@C-term	-0.00406493	1438.55	720.283	1438.56	720.285	2	8
1	110.11	38.64	P02760	AMBP_HUMAN	Protein AMBP OS=Homo sapiens GN=AMBP PE=1 SV=1	0	97.05	CVLFPYGGCQGNGNK	Carbamidomethyl(C)@1; Carbamidomethyl(C)@9; Deamidated(N)@12		7.92401e-05	1670.72	836.366	1670.72	836.366	2	13
1	110.11	38.64	P02760	AMBP_HUMAN	Protein AMBP OS=Homo sapiens GN=AMBP PE=1 SV=1	0	96.71	EYCGVPGDGDEELLR	Carbamidomethyl(C)@3		0.00313892	1707.74	854.879	1707.74	854.878	2	15
1	110.11	38.64	P02760	AMBP_HUMAN	Protein AMBP OS=Homo sapiens GN=AMBP PE=1 SV=1	0	96.4	TVAACNLPIVR	Carbamidomethyl(C)@5		0.00942883	1212.67	405.232	1212.66	405.229	3	11
1	110.11	38.64	P02760	AMBP_HUMAN	Protein AMBP OS=Homo sapiens GN=AMBP PE=1 SV=1	0	96.4	TVAACNLPIVR	Carbamidomethyl(C)@5		0.0109852	1212.68	405.233	1212.66	405.229	3	10
1	110.11	38.64	P02760	AMBP_HUMAN	Protein AMBP OS=Homo sapiens GN=AMBP PE=1 SV=1	0	95.9	TVAACNLPIVR	Carbamidomethyl(C)@5		0.00942883	1212.67	405.232	1212.66	405.229	3	11
1	110.11	38.64	P02760	AMBP_HUMAN	Protein AMBP OS=Homo sapiens GN=AMBP PE=1 SV=1	0.60206	95.51	ECLQTCR	Glu->pyro-Glu@N-term; Carbamidomethyl(C)@2; Carbamidomethyl(C)@6		-0.000286013	947.395	474.705	947.395	474.705	2	8

## Sheet: T1DM
N	Total	%Cov(95)	Accessions	Entry	Names	Contrib	Conf	Sequence	Modifications	Cleavages	dMass	Prec MW	Prec m/z	Theor MW	Theor m/z	Theor z	Sc
1	167.84	57.1	P02760	AMBP_HUMAN	Protein AMBP OS=Homo sapiens GN=AMBP PE=1 SV=1	2	99	AACNLPIVR	Carbamidomethyl(C)@3	cleaved V-A@N-term	0.00521583	1012.55	507.284	1012.55	507.282	2	11
1	167.84	57.1	P02760	AMBP_HUMAN	Protein AMBP OS=Homo sapiens GN=AMBP PE=1 SV=1	2	99	ACNLPIVR	Carbamidomethyl(C)@2	cleaved A-A@N-term	-0.00111624	941.51	471.762	941.512	471.763	2	10
1	167.84	57.1	P02760	AMBP_HUMAN	Protein AMBP OS=Homo sapiens GN=AMBP PE=1 SV=1	2	99	AFIQLW		cleaved W-A@C-term	-0.003164	776.419	389.217	776.422	389.218	2	7
1	167.84	57.1	P02760	AMBP_HUMAN	Protein AMBP OS=Homo sapiens GN=AMBP PE=1 SV=1	2	99	AFIQLWAFDAVK			0.00230593	1407.76	704.886	1407.76	704.885	2	16
1	167.84	57.1	P02760	AMBP_HUMAN	Protein AMBP OS=Homo sapiens GN=AMBP PE=1 SV=1	2	99	AFIQLWAFDAVKGK		missed K-G@12	0.00247955	1592.87	531.965	1592.87	531.964	3	15
1	167.84	57.1	P02760	AMBP_HUMAN	Protein AMBP OS=Homo sapiens GN=AMBP PE=1 SV=1	2	99	AVLPQEEEGSGGGQLVTEVTK	Dehydrated(S)@10		0.00329955	2109.06	704.028	2109.06	704.027	3	23
1	167.84	57.1	P02760	AMBP_HUMAN	Protein AMBP OS=Homo sapiens GN=AMBP PE=1 SV=1	2	99	AVLPQEEEGSGGGQLVTEVTKK	Dehydrated(S)@10	missed K-K@21	0.00217596	2237.16	746.726	2237.15	746.725	3	21
1	167.84	57.1	P02760	AMBP_HUMAN	Protein AMBP OS=Homo sapiens GN=AMBP PE=1 SV=1	2	99	CNLPIVR	Carbamidomethyl(C)@1	cleaved A-C@N-term	2.17616e-06	870.475	436.245	870.475	436.245	2	8
1	167.84	57.1	P02760	AMBP_HUMAN	Protein AMBP OS=Homo sapiens GN=AMBP PE=1 SV=1	2	99	CVLFPY	Carbamidomethyl(C)@1	cleaved Y-G@C-term	-0.00145088	797.377	399.696	797.378	399.696	2	8
1	167.84	57.1	P02760	AMBP_HUMAN	Protein AMBP OS=Homo sapiens GN=AMBP PE=1 SV=1	2	99	CVLFPYG	Carbamidomethyl(C)@1	cleaved G-G@C-term	0.000722215	854.4	428.207	854.4	428.207	2	8
1	167.84	57.1	P02760	AMBP_HUMAN	Protein AMBP OS=Homo sapiens GN=AMBP PE=1 SV=1	2	99	CVLFPYGG	Carbamidomethyl(C)@1	cleaved G-C@C-term	-0.00115244	911.42	456.717	911.421	456.718	2	9
1	167.84	57.1	P02760	AMBP_HUMAN	Protein AMBP OS=Homo sapiens GN=AMBP PE=1 SV=1	2	99	CVLFPYGGC	Carbamidomethyl(C)@1; Carbamidomethyl(C)@9	cleaved C-Q@C-term	-0.00106961	1071.45	536.733	1071.45	536.733	2	12
1	167.84	57.1	P02760	AMBP_HUMAN	Protein AMBP OS=Homo sapiens GN=AMBP PE=1 SV=1	2	99	CVLFPYGGCQG	Carbamidomethyl(C)@1; Carbamidomethyl(C)@9	cleaved G-N@C-term	-0.000338991	1256.53	629.273	1256.53	629.273	2	14
1	167.84	57.1	P02760	AMBP_HUMAN	Protein AMBP OS=Homo sapiens GN=AMBP PE=1 SV=1	2	99	CVLFPYGGCQGN	Carbamidomethyl(C)@1; Carbamidomethyl(C)@9	cleaved N-G@C-term	0.00207375	1370.58	686.296	1370.57	686.295	2	16
1	167.84	57.1	P02760	AMBP_HUMAN	Protein AMBP OS=Homo sapiens GN=AMBP PE=1 SV=1	2	99	CVLFPYGGCQGNGNK	Carbamidomethyl(C)@1; Carbamidomethyl(C)@9		0.00307853	1669.74	557.586	1669.73	557.585	3	22
1	167.84	57.1	P02760	AMBP_HUMAN	Protein AMBP OS=Homo sapiens GN=AMBP PE=1 SV=1	2	99	CVLFPYGGCQGNGNKFYSEK	Carbamidomethyl(C)@1; Carbamidomethyl(C)@9	missed K-F@15	0.00828298	2324.04	775.688	2324.04	775.686	3	20
1	167.84	57.1	P02760	AMBP_HUMAN	Protein AMBP OS=Homo sapiens GN=AMBP PE=1 SV=1	2	99	CVLFPYGGCQGNGNKFYSEKECR	Carbamidomethyl(C)@1; Carbamidomethyl(C)@9; Carbamidomethyl(C)@22	missed K-F@15; missed K-E@20	0.00894818	2769.22	693.312	2769.21	693.31	4	18
1	167.84	57.1	P02760	AMBP_HUMAN	Protein AMBP OS=Homo sapiens GN=AMBP PE=1 SV=1	2	99	ECLQTCR	Glu->pyro-Glu@N-term; Carbamidomethyl(C)@2; Deamidated(Q)@4; Carbamidomethyl(C)@6		-0.00320091	948.376	475.195	948.379	475.197	2	8
1	167.84	57.1	P02760	AMBP_HUMAN	Protein AMBP OS=Homo sapiens GN=AMBP PE=1 SV=1	2	99	ECLQTCRTVAACNLPIVR	Carbamidomethyl(C)@2; No Carbamidomethyl(C)@6; Carbamidomethyl(C)@12	missed R-T@7	0.0232014	2103.06	702.028	2103.04	702.02	3	14
1	167.84	57.1	P02760	AMBP_HUMAN	Protein AMBP OS=Homo sapiens GN=AMBP PE=1 SV=1	2	99	EDSCQLGY	Glu->pyro-Glu@N-term; Carbamidomethyl(C)@4	cleaved Y-S@C-term	0.00210074	952.362	477.188	952.36	477.187	2	10
1	167.84	57.1	P02760	AMBP_HUMAN	Protein AMBP OS=Homo sapiens GN=AMBP PE=1 SV=1	2	99	EDSCQLGYSAGP	Carbamidomethyl(C)@4	cleaved P-C@C-term	-0.00380952	1282.51	642.262	1282.51	642.264	2	13
1	167.84	57.1	P02760	AMBP_HUMAN	Protein AMBP OS=Homo sapiens GN=AMBP PE=1 SV=1	2	99	EDSCQLGYSAGPC	Carbamidomethyl(C)@4; Carbamidomethyl(C)@13	cleaved C-M@C-term	0.000794782	1442.55	722.28	1442.54	722.279	2	16
1	167.84	57.1	P02760	AMBP_HUMAN	Protein AMBP OS=Homo sapiens GN=AMBP PE=1 SV=1	2	99	EDSCQLGYSAGPCMGM	Carbamidomethyl(C)@4; Carbamidomethyl(C)@13; Oxidation(M)@16	cleaved M-T@C-term	-0.00302904	1777.64	889.827	1777.64	889.828	2	15
1	167.84	57.1	P02760	AMBP_HUMAN	Protein AMBP OS=Homo sapiens GN=AMBP PE=1 SV=1	2	99	EDSCQLGYSAGPCMGMTSR	Glu->pyro-Glu@N-term; Carbamidomethyl(C)@4; Carbamidomethyl(C)@13; Oxidation(M)@14		0.00551853	2103.82	702.28	2103.81	702.278	3	22
1	167.84	57.1	P02760	AMBP_HUMAN	Protein AMBP OS=Homo sapiens GN=AMBP PE=1 SV=1	2	99	EDSIFTMADRGECVPGEQEPEPILIPRVRRAVLPQEEEGSGGGQLVTEVTKK	Carbamidomethyl(C)@13	cleaved P-E@N-term; missed R-G@10; missed R-V@27; missed R-R@29; missed R-A@30; missed K-K@51	-11.0607	5721.82	954.644	5732.88	956.487	6	16
1	167.84	57.1	P02760	AMBP_HUMAN	Protein AMBP OS=Homo sapiens GN=AMBP PE=1 SV=1	2	99	ETLLQDFR			-0.00247612	1020.52	511.268	1020.52	511.269	2	11
1	167.84	57.1	P02760	AMBP_HUMAN	Protein AMBP OS=Homo sapiens GN=AMBP PE=1 SV=1	2	99	EYCGVPGD	Carbamidomethyl(C)@3	cleaved D-G@C-term	-0.00132528	895.337	448.676	895.338	448.676	2	10
1	167.84	57.1	P02760	AMBP_HUMAN	Protein AMBP OS=Homo sapiens GN=AMBP PE=1 SV=1	2	99	EYCGVPGDG	Carbamidomethyl(C)@3	cleaved G-D@C-term	-0.00290411	952.357	477.186	952.36	477.187	2	10
1	167.84	57.1	P02760	AMBP_HUMAN	Protein AMBP OS=Homo sapiens GN=AMBP PE=1 SV=1	2	99	EYCGVPGDGD	Carbamidomethyl(C)@3	cleaved D-E@C-term	0.00268506	1067.39	534.702	1067.39	534.701	2	10
1	167.84	57.1	P02760	AMBP_HUMAN	Protein AMBP OS=Homo sapiens GN=AMBP PE=1 SV=1	2	99	EYCGVPGDGDE	Carbamidomethyl(C)@3	cleaved E-E@C-term	0.00130324	1196.43	599.222	1196.43	599.222	2	12
1	167.84	57.1	P02760	AMBP_HUMAN	Protein AMBP OS=Homo sapiens GN=AMBP PE=1 SV=1	2	99	EYCGVPGDGDEE	Carbamidomethyl(C)@3	cleaved E-L@C-term	-0.00344789	1325.47	663.741	1325.47	663.743	2	11
1	167.84	57.1	P02760	AMBP_HUMAN	Protein AMBP OS=Homo sapiens GN=AMBP PE=1 SV=1	2	99	EYCGVPGDGDEEL	Carbamidomethyl(C)@3	cleaved L-L@C-term	-0.000651066	1438.56	720.285	1438.56	720.285	2	14
1	167.84	57.1	P02760	AMBP_HUMAN	Protein AMBP OS=Homo sapiens GN=AMBP PE=1 SV=1	2	99	EYCGVPGDGDEELL	Carbamidomethyl(C)@3	cleaved L-R@C-term	-0.00155905	1551.64	776.827	1551.64	776.827	2	17
1	167.84	57.1	P02760	AMBP_HUMAN	Protein AMBP OS=Homo sapiens GN=AMBP PE=1 SV=1	2	99	EYCGVPGDGDEELLR	Carbamidomethyl(C)@3		0.00579682	1707.75	854.881	1707.74	854.878	2	22
1	167.84	57.1	P02760	AMBP_HUMAN	Protein AMBP OS=Homo sapiens GN=AMBP PE=1 SV=1	2	99	EYCGVPGDGDEELLRF	Carbamidomethyl(C)@3	cleaved F-S@C-term; missed R-F@15	0.00309467	1854.81	928.413	1854.81	928.412	2	15
1	167.84	57.1	P02760	AMBP_HUMAN	Protein AMBP OS=Homo sapiens GN=AMBP PE=1 SV=1	2	99	FIQLWAFDAVK		cleaved A-F@N-term	2.34682e-05	1336.72	669.366	1336.72	669.366	2	13
1	167.84	57.1	P02760	AMBP_HUMAN	Protein AMBP OS=Homo sapiens GN=AMBP PE=1 SV=1	2	99	FPYGGCQGNGNKFYSEKECREYCGVPGDGDEELLR	Carbamidomethyl(C)@6; Carbamidomethyl(C)@19; Carbamidomethyl(C)@23	cleaved L-F@N-term; missed K-F@12; missed K-E@17; missed R-E@20	-13.0402	4073.72	679.96	4086.76	682.133	6	10
1	167.84	57.1	P02760	AMBP_HUMAN	Protein AMBP OS=Homo sapiens GN=AMBP PE=1 SV=1	2	99	FVTEKECLQTCR	Carbamidomethyl(C)@7; Carbamidomethyl(C)@11	cleaved N-F@N-term; missed K-E@5	0.00038523	1569.73	524.25	1569.73	524.25	3	13
1	167.84	57.1	P02760	AMBP_HUMAN	Protein AMBP OS=Homo sapiens GN=AMBP PE=1 SV=1	2	99	FYSEKECR	Formyl(K)@5; Carbamidomethyl(C)@7	missed K-E@5	-0.00269935	1145.48	573.746	1145.48	573.748	2	8
1	167.84	57.1	P02760	AMBP_HUMAN	Protein AMBP OS=Homo sapiens GN=AMBP PE=1 SV=1	2	99	GGCMGNGNNFVTEK	Carbamidomethyl(C)@3; Deamidated(N)@6	cleaved Y-G@N-term	-0.000666546	1484.6	743.308	1484.6	743.308	2	14
1	167.84	57.1	P02760	AMBP_HUMAN	Protein AMBP OS=Homo sapiens GN=AMBP PE=1 SV=1	2	99	GGCMGNGNNFVTEKECLQTCR	Carbamidomethyl(C)@3; Deamidated(N)@6; Carbamidomethyl(C)@16; Carbamidomethyl(C)@20	cleaved Y-G@N-term; missed K-E@14	0.00628296	2432	811.675	2432	811.673	3	18
1	167.84	57.1	P02760	AMBP_HUMAN	Protein AMBP OS=Homo sapiens GN=AMBP PE=1 SV=1	2	99	GGGQLVTEVTK		cleaved S-G@N-term	-0.00302142	1087.58	544.799	1087.59	544.801	2	15
1	167.84	57.1	P02760	AMBP_HUMAN	Protein AMBP OS=Homo sapiens GN=AMBP PE=1 SV=1	2	99	GGQLVTEVTK		cleaved G-G@N-term	-0.00204112	1030.56	516.289	1030.57	516.29	2	14
1	167.84	57.1	P02760	AMBP_HUMAN	Protein AMBP OS=Homo sapiens GN=AMBP PE=1 SV=1	2	99	GKCVLFPY	Carbamidomethyl(C)@3	cleaved Y-G@C-term; missed K-C@2	-0.00295863	982.492	492.253	982.495	492.255	2	8
1	167.84	57.1	P02760	AMBP_HUMAN	Protein AMBP OS=Homo sapiens GN=AMBP PE=1 SV=1	2	99	GKCVLFPYGG	Carbamidomethyl(C)@3	cleaved G-C@C-term; missed K-C@2	0.000104789	1096.54	549.276	1096.54	549.276	2	9
1	167.84	57.1	P02760	AMBP_HUMAN	Protein AMBP OS=Homo sapiens GN=AMBP PE=1 SV=1	2	99	GKCVLFPYGGCQGNGNK	Carbamidomethyl(C)@3; Carbamidomethyl(C)@11	missed K-C@2	0.000888972	1854.85	619.291	1854.85	619.291	3	20
1	167.84	57.1	P02760	AMBP_HUMAN	Protein AMBP OS=Homo sapiens GN=AMBP PE=1 SV=1	2	99	GNNFVTEKECLQTCR	Carbamidomethyl(C)@10; Carbamidomethyl(C)@14	cleaved N-G@N-term; missed K-E@8	0.00435422	1854.84	619.287	1854.84	619.286	3	18
1	167.84	57.1	P02760	AMBP_HUMAN	Protein AMBP OS=Homo sapiens GN=AMBP PE=1 SV=1	2	99	GQLVTEVTK		cleaved G-G@N-term	-0.00218956	973.542	487.778	973.544	487.779	2	8
1	167.84	57.1	P02760	AMBP_HUMAN	Protein AMBP OS=Homo sapiens GN=AMBP PE=1 SV=1	2	99	GVCEETSGAYEK	Carbamidomethyl(C)@3		-0.00504705	1328.55	665.283	1328.56	665.285	2	14
1	167.84	57.1	P02760	AMBP_HUMAN	Protein AMBP OS=Homo sapiens GN=AMBP PE=1 SV=1	2	99	GVCEETSGAYEKTDTDGK	Carbamidomethyl(C)@3	missed K-T@12	-0.00246076	1945.82	649.614	1945.82	649.614	3	17
1	167.84	57.1	P02760	AMBP_HUMAN	Protein AMBP OS=Homo sapiens GN=AMBP PE=1 SV=1	2	99	GVPGDGDEELLR		cleaved C-G@N-term	-0.00276214	1255.6	628.808	1255.6	628.81	2	11
1	167.84	57.1	P02760	AMBP_HUMAN	Protein AMBP OS=Homo sapiens GN=AMBP PE=1 SV=1	2	99	GYSAGPCMGMTSR	Carbamidomethyl(C)@7; Oxidation(M)@10	cleaved L-G@N-term	-0.00120472	1389.55	695.78	1389.55	695.781	2	12
1	167.84	57.1	P02760	AMBP_HUMAN	Protein AMBP OS=Homo sapiens GN=AMBP PE=1 SV=1	2	99	IQLWAFDAVK		cleaved F-I@N-term	-0.000272284	1189.65	595.832	1189.65	595.832	2	16
1	167.84	57.1	P02760	AMBP_HUMAN	Protein AMBP OS=Homo sapiens GN=AMBP PE=1 SV=1	2	99	KCVLFPYGGCQGNGNK	Carbamidomethyl(C)@2; Carbamidomethyl(C)@10; Deamidated(N)@13	cleaved G-K@N-term; missed K-C@1	0.0186319	1798.83	600.618	1798.81	600.612	3	12
1	167.84	57.1	P02760	AMBP_HUMAN	Protein AMBP OS=Homo sapiens GN=AMBP PE=1 SV=1	2	99	KEDSCQLGY	Carbamidomethyl(C)@5	cleaved Y-S@C-term; missed K-E@1	-0.00115851	1098.46	550.239	1098.47	550.24	2	12
1	167.84	57.1	P02760	AMBP_HUMAN	Protein AMBP OS=Homo sapiens GN=AMBP PE=1 SV=1	2	99	KEDSCQLGYSAGP	Carbamidomethyl(C)@5; Amidated@C-term	cleaved P-C@C-term; missed K-E@1	-0.00160343	1409.62	705.819	1409.62	705.82	2	14
1	167.84	57.1	P02760	AMBP_HUMAN	Protein AMBP OS=Homo sapiens GN=AMBP PE=1 SV=1	2	99	KEDSCQLGYSAGPC	Carbamidomethyl(C)@5; Carbamidomethyl(C)@14	cleaved C-M@C-term; missed K-E@1	8.75111e-05	1570.64	786.327	1570.64	786.327	2	19
1	167.84	57.1	P02760	AMBP_HUMAN	Protein AMBP OS=Homo sapiens GN=AMBP PE=1 SV=1	2	99	KEDSCQLGYSAGPCMGM	Carbamidomethyl(C)@5; Carbamidomethyl(C)@14; Oxidation(M)@15	cleaved M-T@C-term; missed K-E@1	0.00208156	1905.74	636.254	1905.74	636.253	3	19
1	167.84	57.1	P02760	AMBP_HUMAN	Protein AMBP OS=Homo sapiens GN=AMBP PE=1 SV=1	2	99	KEDSCQLGYSAGPCMGMTSR	Carbamidomethyl(C)@5; Carbamidomethyl(C)@14	missed K-E@1	-0.00043634	2233.92	745.648	2233.92	745.648	3	23
1	167.84	57.1	P02760	AMBP_HUMAN	Protein AMBP OS=Homo sapiens GN=AMBP PE=1 SV=1	2	99	KGVCEETSGAYEKTDTDGK	Carbamidomethyl(C)@4	missed K-G@1; missed K-T@13	0.00503	2073.92	519.487	2073.92	519.486	4	18
1	167.84	57.1	P02760	AMBP_HUMAN	Protein AMBP OS=Homo sapiens GN=AMBP PE=1 SV=1	2	99	LWAFDAVK		cleaved Q-L@N-term	0.000823525	948.508	475.261	948.507	475.261	2	10
1	167.84	57.1	P02760	AMBP_HUMAN	Protein AMBP OS=Homo sapiens GN=AMBP PE=1 SV=1	2	99	MGNGNNFVTEK		cleaved C-M@N-term	-0.00163876	1209.54	605.779	1209.54	605.78	2	11
1	167.84	57.1	P02760	AMBP_HUMAN	Protein AMBP OS=Homo sapiens GN=AMBP PE=1 SV=1	2	99	MGNGNNFVTEKECLQTCR	Carbamidomethyl(C)@13; Carbamidomethyl(C)@17	cleaved C-M@N-term; missed K-E@11	0.000571166	2156.94	719.987	2156.94	719.987	3	20
1	167.84	57.1	P02760	AMBP_HUMAN	Protein AMBP OS=Homo sapiens GN=AMBP PE=1 SV=1	2	99	NFVTEKECLQTCR	Carbamidomethyl(C)@8; Carbamidomethyl(C)@12	cleaved N-N@N-term; missed K-E@6	-0.000228252	1683.77	562.264	1683.77	562.264	3	15
1	167.84	57.1	P02760	AMBP_HUMAN	Protein AMBP OS=Homo sapiens GN=AMBP PE=1 SV=1	2	99	NGNNFVTEKECLQTCR	Carbamidomethyl(C)@11; Carbamidomethyl(C)@15	cleaved G-N@N-term; missed K-E@9	-0.00234139	1968.88	657.299	1968.88	657.3	3	15
1	167.84	57.1	P02760	AMBP_HUMAN	Protein AMBP OS=Homo sapiens GN=AMBP PE=1 SV=1	2	99	NLPIVR		cleaved C-N@N-term	-0.00107785	710.443	356.229	710.444	356.229	2	7
1	167.84	57.1	P02760	AMBP_HUMAN	Protein AMBP OS=Homo sapiens GN=AMBP PE=1 SV=1	2	99	NNFVTEKECLQTCR	Carbamidomethyl(C)@9; Carbamidomethyl(C)@13	cleaved G-N@N-term; missed K-E@7	0.00295366	1797.82	600.279	1797.81	600.279	3	15
1	167.84	57.1	P02760	AMBP_HUMAN	Protein AMBP OS=Homo sapiens GN=AMBP PE=1 SV=1	2	99	PGDGDEELLR		cleaved V-P@N-term	0.000862076	1099.52	550.765	1099.51	550.765	2	9
1	167.84	57.1	P02760	AMBP_HUMAN	Protein AMBP OS=Homo sapiens GN=AMBP PE=1 SV=1	2	99	PYGGCQGNGNK	Carbamidomethyl(C)@5; Deamidated(N)@8	cleaved F-P@N-term	-0.000856355	1151.47	576.74	1151.47	576.741	2	11
1	167.84	57.1	P02760	AMBP_HUMAN	Protein AMBP OS=Homo sapiens GN=AMBP PE=1 SV=1	2	99	QLVTEVTK	Gln->pyro-Glu@N-term	cleaved G-Q@N-term	0.00109603	899.497	450.756	899.496	450.755	2	10
1	167.84	57.1	P02760	AMBP_HUMAN	Protein AMBP OS=Homo sapiens GN=AMBP PE=1 SV=1	2	99	QYGGCMGNGNNFVTEK	Carbamidomethyl(C)@5; Oxidation(M)@6; Deamidated(N)@8	cleaved F-Q@N-term	0.0036115	1791.72	598.248	1791.72	598.247	3	18
1	167.84	57.1	P02760	AMBP_HUMAN	Protein AMBP OS=Homo sapiens GN=AMBP PE=1 SV=1	2	99	RRAVLPQEEEGSGGGQLVTEVTK		cleaved V-R@N-term; missed R-R@1; missed R-A@2	-8.99637	2430.28	1216.14	2439.27	1220.64	2	17
1	167.84	57.1	P02760	AMBP_HUMAN	Protein AMBP OS=Homo sapiens GN=AMBP PE=1 SV=1	2	99	RTVAACNLPIVR	Carbamidomethyl(C)@6	cleaved C-R@N-term; missed R-T@1	0.00207418	1368.77	457.263	1368.77	457.263	3	9
1	167.84	57.1	P02760	AMBP_HUMAN	Protein AMBP OS=Homo sapiens GN=AMBP PE=1 SV=1	2	99	SAGPCMGMTSR	Carbamidomethyl(C)@5	cleaved Y-S@N-term	-0.00456756	1153.46	577.739	1153.47	577.741	2	14
1	167.84	57.1	P02760	AMBP_HUMAN	Protein AMBP OS=Homo sapiens GN=AMBP PE=1 SV=1	2	99	SCQLGYSAGPCMGMTSR	Carbamidomethyl(C)@2; Carbamidomethyl(C)@11; Oxidation(M)@12; Oxidation(M)@14	cleaved D-S@N-term	0.00619315	1893.75	632.259	1893.75	632.257	3	20
1	167.84	57.1	P02760	AMBP_HUMAN	Protein AMBP OS=Homo sapiens GN=AMBP PE=1 SV=1	2	99	TVAACNLPIVR	Didehydro(T)@1; Carbamidomethyl(C)@5		-0.000949849	1210.65	606.331	1210.65	606.332	2	13
1	167.84	57.1	P02760	AMBP_HUMAN	Protein AMBP OS=Homo sapiens GN=AMBP PE=1 SV=1	2	99	TVAACNLPIVRGP	Carbamidomethyl(C)@5	cleaved P-C@C-term; missed R-G@11	-0.0038713	1366.74	684.375	1366.74	684.377	2	11
1	167.84	57.1	P02760	AMBP_HUMAN	Protein AMBP OS=Homo sapiens GN=AMBP PE=1 SV=1	2	99	TVAACNLPIVRGPCR	Carbamidomethyl(C)@5; Carbamidomethyl(C)@14	missed R-G@11	-0.00225016	1682.87	561.963	1682.87	561.964	3	13
1	167.84	57.1	P02760	AMBP_HUMAN	Protein AMBP OS=Homo sapiens GN=AMBP PE=1 SV=1	2	99	VAACNLPIVR	Carbamidomethyl@N-term; Carbamidomethyl(C)@4	cleaved T-V@N-term	0.00589176	1168.64	585.33	1168.64	585.327	2	11
1	167.84	57.1	P02760	AMBP_HUMAN	Protein AMBP OS=Homo sapiens GN=AMBP PE=1 SV=1	2	99	WAFDAVK		cleaved L-W@N-term	-7.30832e-06	835.423	418.719	835.423	418.719	2	10
1	167.84	57.1	P02760	AMBP_HUMAN	Protein AMBP OS=Homo sapiens GN=AMBP PE=1 SV=1	2	99	YSAGPCMGMTSR	Carbamidomethyl(C)@6	cleaved G-Y@N-term	0.00205098	1316.53	659.274	1316.53	659.273	2	9
1	167.84	57.1	P02760	AMBP_HUMAN	Protein AMBP OS=Homo sapiens GN=AMBP PE=1 SV=1	1.85387	99	RAVLPQEEEGSGGGQLVTEVTKK		missed R-A@1; missed K-K@22	-9.01056	2402.26	1202.13	2411.27	1206.64	2	17
1	167.84	57.1	P02760	AMBP_HUMAN	Protein AMBP OS=Homo sapiens GN=AMBP PE=1 SV=1	1.55284	99	VLFPYGGCQGNGNK	Carbamidomethyl(C)@8; Deamidated(N)@11	cleaved C-V@N-term	0.00624741	1510.69	756.354	1510.69	756.351	2	12
1	167.84	57.1	P02760	AMBP_HUMAN	Protein AMBP OS=Homo sapiens GN=AMBP PE=1 SV=1	1.20761	99	QLVTEVTKK	Gln->pyro-Glu@N-term	cleaved G-Q@N-term; missed K-K@8	0.00148478	1027.59	514.804	1027.59	514.803	2	8
1	167.84	57.1	P02760	AMBP_HUMAN	Protein AMBP OS=Homo sapiens GN=AMBP PE=1 SV=1	0.400117	99	QGVGIPEDSIFTMADRGECVPGEQEPEPILIPRVRRAVLPQEEEGSGGGQLVTEVTK	Carbamidomethyl(C)@19	cleaved A-Q@N-term; missed R-G@16; missed R-V@33; missed R-R@35; missed R-A@36	-12.0133	6144.08	1229.82	6156.09	1232.23	5	14
1	167.84	57.1	P02760	AMBP_HUMAN	Protein AMBP OS=Homo sapiens GN=AMBP PE=1 SV=1	0.10513	99	EEEGSGGGQLVTEVTK	Dehydrated(S)@5	cleaved Q-E@N-term	-0.00304376	1600.76	801.385	1600.76	801.386	2	17
1	167.84	57.1	P02760	AMBP_HUMAN	Protein AMBP OS=Homo sapiens GN=AMBP PE=1 SV=1	0.0996329	99	GNGNNFVTEK	Ammonia-loss(N)@4	cleaved M-G@N-term	-0.00149644	1061.48	531.745	1061.48	531.746	2	10
1	167.84	57.1	P02760	AMBP_HUMAN	Protein AMBP OS=Homo sapiens GN=AMBP PE=1 SV=1	0.034328	99	PRVRRAVLPQEEEGSGGGQLVTEVTK		cleaved I-P@N-term; missed R-V@2; missed R-R@4; missed R-A@5	-4.96438	2786.53	929.851	2791.49	931.505	3	14
1	167.84	57.1	P02760	AMBP_HUMAN	Protein AMBP OS=Homo sapiens GN=AMBP PE=1 SV=1	0.0277972	99	DRGECVPGEQEPEPILIPRVRRAVLPQEEEGSGGGQLVTEVTKK	Carbamidomethyl(C)@5	cleaved A-D@N-term; missed R-G@2; missed R-V@19; missed R-R@21; missed R-A@22; missed K-K@43	-5.06189	4833.44	967.695	4838.5	968.707	5	16
1	167.84	57.1	P02760	AMBP_HUMAN	Protein AMBP OS=Homo sapiens GN=AMBP PE=1 SV=1	0.00348833	99	EEEGSGGGQLVTEVTKKEDSCQLGYSAGPCMGMTSRYFYNGT	Carbamidomethyl(C)@21; Carbamidomethyl(C)@30	cleaved Q-E@N-term; cleaved T-S@C-term; missed K-K@16; missed K-E@17; missed R-Y@36	-9.0569	4570.93	1143.74	4579.99	1146	4	15
1	167.84	57.1	P02760	AMBP_HUMAN	Protein AMBP OS=Homo sapiens GN=AMBP PE=1 SV=1	0	99	AACNLPIVR	Carbamidomethyl(C)@3	cleaved V-A@N-term	0.00521583	1012.55	507.284	1012.55	507.282	2	11
1	167.84	57.1	P02760	AMBP_HUMAN	Protein AMBP OS=Homo sapiens GN=AMBP PE=1 SV=1	0	99	AACNLPIVR	Carbamidomethyl(C)@3	cleaved V-A@N-term	-5.33999e-05	1012.55	507.282	1012.55	507.282	2	11
1	167.84	57.1	P02760	AMBP_HUMAN	Protein AMBP OS=Homo sapiens GN=AMBP PE=1 SV=1	0	99	AACNLPIVR	Carbamidomethyl(C)@3	cleaved V-A@N-term	0.00232696	1012.55	507.283	1012.55	507.282	2	13
1	167.84	57.1	P02760	AMBP_HUMAN	Protein AMBP OS=Homo sapiens GN=AMBP PE=1 SV=1	0	99	AACNLPIVR	Carbamidomethyl(C)@3	cleaved V-A@N-term	0.000129705	1012.55	507.282	1012.55	507.282	2	11
1	167.84	57.1	P02760	AMBP_HUMAN	Protein AMBP OS=Homo sapiens GN=AMBP PE=1 SV=1	0	99	AACNLPIVR	Carbamidomethyl(C)@3	cleaved V-A@N-term	-0.00206094	1012.55	507.281	1012.55	507.282	2	10
1	167.84	57.1	P02760	AMBP_HUMAN	Protein AMBP OS=Homo sapiens GN=AMBP PE=1 SV=1	0	99	AACNLPIVR	Carbamidomethyl(C)@3	cleaved V-A@N-term	0.00147711	1012.55	507.282	1012.55	507.282	2	12
1	167.84	57.1	P02760	AMBP_HUMAN	Protein AMBP OS=Homo sapiens GN=AMBP PE=1 SV=1	0	99	AACNLPIVR	Carbamidomethyl(C)@3	cleaved V-A@N-term	0.000205901	1012.55	507.282	1012.55	507.282	2	8
1	167.84	57.1	P02760	AMBP_HUMAN	Protein AMBP OS=Homo sapiens GN=AMBP PE=1 SV=1	0	99	AACNLPIVR	Carbamidomethyl(C)@3	cleaved V-A@N-term	0.000205901	1012.55	507.282	1012.55	507.282	2	12
1	167.84	57.1	P02760	AMBP_HUMAN	Protein AMBP OS=Homo sapiens GN=AMBP PE=1 SV=1	0	99	AACNLPIVR	Carbamidomethyl(C)@3	cleaved V-A@N-term	0.000205901	1012.55	507.282	1012.55	507.282	2	9
1	167.84	57.1	P02760	AMBP_HUMAN	Protein AMBP OS=Homo sapiens GN=AMBP PE=1 SV=1	0	99	AACNLPIVR	Carbamidomethyl(C)@3	cleaved V-A@N-term	-9.24404e-05	1012.55	507.282	1012.55	507.282	2	10
1	167.84	57.1	P02760	AMBP_HUMAN	Protein AMBP OS=Homo sapiens GN=AMBP PE=1 SV=1	0	99	AACNLPIVR	Carbamidomethyl(C)@3	cleaved V-A@N-term	-9.24404e-05	1012.55	507.282	1012.55	507.282	2	13
1	167.84	57.1	P02760	AMBP_HUMAN	Protein AMBP OS=Homo sapiens GN=AMBP PE=1 SV=1	0	99	AACNLPIVR	Carbamidomethyl(C)@3	cleaved V-A@N-term	-0.00192347	1012.55	507.281	1012.55	507.282	2	11
1	167.84	57.1	P02760	AMBP_HUMAN	Protein AMBP OS=Homo sapiens GN=AMBP PE=1 SV=1	0	99	AACNLPIVR	Carbamidomethyl(C)@3	cleaved V-A@N-term	0.00141446	1012.55	507.282	1012.55	507.282	2	11
1	167.84	57.1	P02760	AMBP_HUMAN	Protein AMBP OS=Homo sapiens GN=AMBP PE=1 SV=1	0	99	AACNLPIVR	Carbamidomethyl(C)@3	cleaved V-A@N-term	0.00141446	1012.55	507.282	1012.55	507.282	2	12
1	167.84	57.1	P02760	AMBP_HUMAN	Protein AMBP OS=Homo sapiens GN=AMBP PE=1 SV=1	0	99	AACNLPIVR	Carbamidomethyl(C)@3	cleaved V-A@N-term	-0.0010081	1012.55	507.281	1012.55	507.282	2	13
1	167.84	57.1	P02760	AMBP_HUMAN	Protein AMBP OS=Homo sapiens GN=AMBP PE=1 SV=1	0	99	AACNLPIVR	Carbamidomethyl(C)@3	cleaved V-A@N-term	-0.0010081	1012.55	507.281	1012.55	507.282	2	12
1	167.84	57.1	P02760	AMBP_HUMAN	Protein AMBP OS=Homo sapiens GN=AMBP PE=1 SV=1	0	99	AACNLPIVR	Carbamidomethyl(C)@3	cleaved V-A@N-term	0.00310404	1012.55	507.283	1012.55	507.282	2	12
1	167.84	57.1	P02760	AMBP_HUMAN	Protein AMBP OS=Homo sapiens GN=AMBP PE=1 SV=1	0	99	AACNLPIVR	Carbamidomethyl(C)@3	cleaved V-A@N-term	0.00147711	1012.55	507.282	1012.55	507.282	2	11
1	167.84	57.1	P02760	AMBP_HUMAN	Protein AMBP OS=Homo sapiens GN=AMBP PE=1 SV=1	0	99	AACNLPIVR	Carbamidomethyl(C)@3	cleaved V-A@N-term	-0.000193346	1012.55	507.282	1012.55	507.282	2	13
1	167.84	57.1	P02760	AMBP_HUMAN	Protein AMBP OS=Homo sapiens GN=AMBP PE=1 SV=1	0	99	AACNLPIVR	Carbamidomethyl(C)@3	cleaved V-A@N-term	0.00353129	1012.55	507.283	1012.55	507.282	2	11
1	167.84	57.1	P02760	AMBP_HUMAN	Protein AMBP OS=Homo sapiens GN=AMBP PE=1 SV=1	0	99	AACNLPIVR	Carbamidomethyl(C)@3	cleaved V-A@N-term	-0.00108136	1012.55	507.281	1012.55	507.282	2	8
1	167.84	57.1	P02760	AMBP_HUMAN	Protein AMBP OS=Homo sapiens GN=AMBP PE=1 SV=1	0	99	AACNLPIVR	Carbamidomethyl(C)@3	cleaved V-A@N-term	-0.00108136	1012.55	507.281	1012.55	507.282	2	12
1	167.84	57.1	P02760	AMBP_HUMAN	Protein AMBP OS=Homo sapiens GN=AMBP PE=1 SV=1	0	99	AACNLPIVR	Carbamidomethyl(C)@3	cleaved V-A@N-term	-0.00370585	1012.55	507.28	1012.55	507.282	2	11
1	167.84	57.1	P02760	AMBP_HUMAN	Protein AMBP OS=Homo sapiens GN=AMBP PE=1 SV=1	0	99	AACNLPIVR	Carbamidomethyl(C)@3	cleaved V-A@N-term	-0.000193346	1012.55	507.282	1012.55	507.282	2	11
1	167.84	57.1	P02760	AMBP_HUMAN	Protein AMBP OS=Homo sapiens GN=AMBP PE=1 SV=1	0	99	AACNLPIVR	Carbamidomethyl(C)@3	cleaved V-A@N-term	-0.00277775	1012.55	507.28	1012.55	507.282	2	11
1	167.84	57.1	P02760	AMBP_HUMAN	Protein AMBP OS=Homo sapiens GN=AMBP PE=1 SV=1	0	99	AACNLPIVR	Carbamidomethyl(C)@3	cleaved V-A@N-term	-0.000193346	1012.55	507.282	1012.55	507.282	2	8
1	167.84	57.1	P02760	AMBP_HUMAN	Protein AMBP OS=Homo sapiens GN=AMBP PE=1 SV=1	0	99	AACNLPIVR	Carbamidomethyl(C)@3	cleaved V-A@N-term	0.00250818	1012.55	507.283	1012.55	507.282	2	9
1	167.84	57.1	P02760	AMBP_HUMAN	Protein AMBP OS=Homo sapiens GN=AMBP PE=1 SV=1	0	99	AACNLPIVR	Carbamidomethyl(C)@3	cleaved V-A@N-term	-0.00381533	1012.55	507.28	1012.55	507.282	2	12
1	167.84	57.1	P02760	AMBP_HUMAN	Protein AMBP OS=Homo sapiens GN=AMBP PE=1 SV=1	0	99	AACNLPIVR	Carbamidomethyl(C)@3	cleaved V-A@N-term	-0.000824657	1012.55	507.281	1012.55	507.282	2	12
1	167.84	57.1	P02760	AMBP_HUMAN	Protein AMBP OS=Homo sapiens GN=AMBP PE=1 SV=1	0	99	ACNLPIVR	Carbamidomethyl(C)@2	cleaved A-A@N-term	-0.00111624	941.51	471.762	941.512	471.763	2	9
1	167.84	57.1	P02760	AMBP_HUMAN	Protein AMBP OS=Homo sapiens GN=AMBP PE=1 SV=1	0	99	ACNLPIVR	Carbamidomethyl(C)@2	cleaved A-A@N-term	-0.000142126	941.511	471.763	941.512	471.763	2	8
1	167.84	57.1	P02760	AMBP_HUMAN	Protein AMBP OS=Homo sapiens GN=AMBP PE=1 SV=1	0	99	ACNLPIVR	Carbamidomethyl(C)@2	cleaved A-A@N-term	-0.000142126	941.511	471.763	941.512	471.763	2	10
1	167.84	57.1	P02760	AMBP_HUMAN	Protein AMBP OS=Homo sapiens GN=AMBP PE=1 SV=1	0	99	ACNLPIVR	Carbamidomethyl(C)@2	cleaved A-A@N-term	0.00133284	941.513	471.764	941.512	471.763	2	8
1	167.84	57.1	P02760	AMBP_HUMAN	Protein AMBP OS=Homo sapiens GN=AMBP PE=1 SV=1	0	99	ACNLPIVR	Carbamidomethyl(C)@2	cleaved A-A@N-term	0.00114974	941.513	471.764	941.512	471.763	2	10
1	167.84	57.1	P02760	AMBP_HUMAN	Protein AMBP OS=Homo sapiens GN=AMBP PE=1 SV=1	0	99	ACNLPIVR	Carbamidomethyl(C)@2	cleaved A-A@N-term	0.00114974	941.513	471.764	941.512	471.763	2	9
1	167.84	57.1	P02760	AMBP_HUMAN	Protein AMBP OS=Homo sapiens GN=AMBP PE=1 SV=1	0	99	ACNLPIVR	Carbamidomethyl(C)@2	cleaved A-A@N-term	-0.00176717	941.51	471.762	941.512	471.763	2	10
1	167.84	57.1	P02760	AMBP_HUMAN	Protein AMBP OS=Homo sapiens GN=AMBP PE=1 SV=1	0	99	ACNLPIVR	Carbamidomethyl(C)@2	cleaved A-A@N-term	-0.00176717	941.51	471.762	941.512	471.763	2	10
1	167.84	57.1	P02760	AMBP_HUMAN	Protein AMBP OS=Homo sapiens GN=AMBP PE=1 SV=1	0	99	ACNLPIVR	Carbamidomethyl(C)@2	cleaved A-A@N-term	-0.00394926	941.508	471.761	941.512	471.763	2	10
1	167.84	57.1	P02760	AMBP_HUMAN	Protein AMBP OS=Homo sapiens GN=AMBP PE=1 SV=1	0	99	ACNLPIVR	Carbamidomethyl(C)@2	cleaved A-A@N-term	-0.000573438	941.511	471.763	941.512	471.763	2	10
1	167.84	57.1	P02760	AMBP_HUMAN	Protein AMBP OS=Homo sapiens GN=AMBP PE=1 SV=1	0	99	ACNLPIVR	Carbamidomethyl(C)@2	cleaved A-A@N-term	0.00177939	941.513	471.764	941.512	471.763	2	10
1	167.84	57.1	P02760	AMBP_HUMAN	Protein AMBP OS=Homo sapiens GN=AMBP PE=1 SV=1	0	99	ACNLPIVR	Carbamidomethyl(C)@2	cleaved A-A@N-term	-0.00121211	941.51	471.762	941.512	471.763	2	10
1	167.84	57.1	P02760	AMBP_HUMAN	Protein AMBP OS=Homo sapiens GN=AMBP PE=1 SV=1	0	99	ACNLPIVR	Carbamidomethyl(C)@2	cleaved A-A@N-term	0.00333959	941.515	471.765	941.512	471.763	2	8
1	167.84	57.1	P02760	AMBP_HUMAN	Protein AMBP OS=Homo sapiens GN=AMBP PE=1 SV=1	0	99	ACNLPIVR	Carbamidomethyl(C)@2	cleaved A-A@N-term	-0.00407928	941.508	471.761	941.512	471.763	2	11
1	167.84	57.1	P02760	AMBP_HUMAN	Protein AMBP OS=Homo sapiens GN=AMBP PE=1 SV=1	0	99	AFIQLW	Oxidation(W)@6	cleaved W-A@C-term	-0.00843837	792.409	397.212	792.417	397.216	2	6
1	167.84	57.1	P02760	AMBP_HUMAN	Protein AMBP OS=Homo sapiens GN=AMBP PE=1 SV=1	0	99	AFIQLW		cleaved W-A@C-term	-0.00277121	776.419	389.217	776.422	389.218	2	6
1	167.84	57.1	P02760	AMBP_HUMAN	Protein AMBP OS=Homo sapiens GN=AMBP PE=1 SV=1	0	99	AFIQLW		cleaved W-A@C-term	-0.00259459	776.419	389.217	776.422	389.218	2	7
1	167.84	57.1	P02760	AMBP_HUMAN	Protein AMBP OS=Homo sapiens GN=AMBP PE=1 SV=1	0	99	AFIQLW	Oxidation(W)@6	cleaved W-A@C-term	0.000113908	792.417	397.216	792.417	397.216	2	7
1	167.84	57.1	P02760	AMBP_HUMAN	Protein AMBP OS=Homo sapiens GN=AMBP PE=1 SV=1	0	99	AFIQLW		cleaved W-A@C-term	-0.00273675	776.419	389.217	776.422	389.218	2	6
1	167.84	57.1	P02760	AMBP_HUMAN	Protein AMBP OS=Homo sapiens GN=AMBP PE=1 SV=1	0	99	AFIQLW	Oxidation(W)@6	cleaved W-A@C-term	-0.0011896	792.416	397.215	792.417	397.216	2	7
1	167.84	57.1	P02760	AMBP_HUMAN	Protein AMBP OS=Homo sapiens GN=AMBP PE=1 SV=1	0	99	AFIQLW	Oxidation(W)@6	cleaved W-A@C-term	-0.00454651	792.412	397.214	792.417	397.216	2	7
1	167.84	57.1	P02760	AMBP_HUMAN	Protein AMBP OS=Homo sapiens GN=AMBP PE=1 SV=1	0	99	AFIQLW	Trp->Kynurenin(W)@6	cleaved W-A@C-term	-0.00368954	780.413	391.214	780.417	391.216	2	7
1	167.84	57.1	P02760	AMBP_HUMAN	Protein AMBP OS=Homo sapiens GN=AMBP PE=1 SV=1	0	99	AFIQLW	Oxidation(W)@6	cleaved W-A@C-term	-0.0015521	792.415	397.215	792.417	397.216	2	7
1	167.84	57.1	P02760	AMBP_HUMAN	Protein AMBP OS=Homo sapiens GN=AMBP PE=1 SV=1	0	99	AFIQLW	Oxidation(W)@6	cleaved W-A@C-term	-0.00234555	792.415	397.215	792.417	397.216	2	7
1	167.84	57.1	P02760	AMBP_HUMAN	Protein AMBP OS=Homo sapiens GN=AMBP PE=1 SV=1	0	99	AFIQLW		cleaved W-A@C-term	-0.00314203	776.419	389.217	776.422	389.218	2	6
1	167.84	57.1	P02760	AMBP_HUMAN	Protein AMBP OS=Homo sapiens GN=AMBP PE=1 SV=1	0	99	AFIQLW	Oxidation(W)@6	cleaved W-A@C-term	-0.00468525	792.412	397.213	792.417	397.216	2	7
1	167.84	57.1	P02760	AMBP_HUMAN	Protein AMBP OS=Homo sapiens GN=AMBP PE=1 SV=1	0	99	AFIQLW	Trp->Kynurenin(W)@6	cleaved W-A@C-term	-0.000651353	780.417	391.216	780.417	391.216	2	7
1	167.84	57.1	P02760	AMBP_HUMAN	Protein AMBP OS=Homo sapiens GN=AMBP PE=1 SV=1	0	99	AFIQLWAFDAVK			0.002428	1407.76	704.886	1407.76	704.885	2	15
1	167.84	57.1	P02760	AMBP_HUMAN	Protein AMBP OS=Homo sapiens GN=AMBP PE=1 SV=1	0	99	AFIQLWAFDAVK			0.00291628	1407.76	704.886	1407.76	704.885	2	17
1	167.84	57.1	P02760	AMBP_HUMAN	Protein AMBP OS=Homo sapiens GN=AMBP PE=1 SV=1	0	99	AFIQLWAFDAVK			0.00352663	1407.76	704.887	1407.76	704.885	2	18
1	167.84	57.1	P02760	AMBP_HUMAN	Protein AMBP OS=Homo sapiens GN=AMBP PE=1 SV=1	0	99	AFIQLWAFDAVK			0.00303835	1407.76	704.886	1407.76	704.885	2	19
1	167.84	57.1	P02760	AMBP_HUMAN	Protein AMBP OS=Homo sapiens GN=AMBP PE=1 SV=1	0	99	AFIQLWAFDAVK	Dioxidation(W)@6		0.00229179	1439.75	720.881	1439.74	720.88	2	14
1	167.84	57.1	P02760	AMBP_HUMAN	Protein AMBP OS=Homo sapiens GN=AMBP PE=1 SV=1	0	99	AFIQLWAFDAVK	Oxidation(W)@6		-0.000775852	1423.75	712.882	1423.75	712.882	2	12
1	167.84	57.1	P02760	AMBP_HUMAN	Protein AMBP OS=Homo sapiens GN=AMBP PE=1 SV=1	0	99	AFIQLWAFDAVK	Oxidation(W)@6		-0.000531712	1423.75	712.882	1423.75	712.882	2	12
1	167.84	57.1	P02760	AMBP_HUMAN	Protein AMBP OS=Homo sapiens GN=AMBP PE=1 SV=1	0	99	AFIQLWAFDAVK	Oxidation(W)@6		-0.000531712	1423.75	712.882	1423.75	712.882	2	14
1	167.84	57.1	P02760	AMBP_HUMAN	Protein AMBP OS=Homo sapiens GN=AMBP PE=1 SV=1	0	99	AFIQLWAFDAVK	Oxidation(W)@6		-0.000531712	1423.75	712.882	1423.75	712.882	2	14
1	167.84	57.1	P02760	AMBP_HUMAN	Protein AMBP OS=Homo sapiens GN=AMBP PE=1 SV=1	0	99	AFIQLWAFDAVK	Oxidation(W)@6		-0.000165503	1423.75	712.882	1423.75	712.882	2	16
1	167.84	57.1	P02760	AMBP_HUMAN	Protein AMBP OS=Homo sapiens GN=AMBP PE=1 SV=1	0	99	AFIQLWAFDAVK	Oxidation(W)@6		0.0050835	1423.76	712.885	1423.75	712.882	2	16
1	167.84	57.1	P02760	AMBP_HUMAN	Protein AMBP OS=Homo sapiens GN=AMBP PE=1 SV=1	0	99	AFIQLWAFDAVK	Oxidation(W)@6		-0.000409642	1423.75	712.882	1423.75	712.882	2	15
1	167.84	57.1	P02760	AMBP_HUMAN	Protein AMBP OS=Homo sapiens GN=AMBP PE=1 SV=1	0	99	AFIQLWAFDAVK	Oxidation(W)@6		-0.000531712	1423.75	712.882	1423.75	712.882	2	15
1	167.84	57.1	P02760	AMBP_HUMAN	Protein AMBP OS=Homo sapiens GN=AMBP PE=1 SV=1	0	99	AFIQLWAFDAVK	Oxidation(W)@6		0.00569385	1423.76	712.885	1423.75	712.882	2	15
1	167.84	57.1	P02760	AMBP_HUMAN	Protein AMBP OS=Homo sapiens GN=AMBP PE=1 SV=1	0	99	AFIQLWAFDAVK			-0.00176874	1407.75	704.884	1407.76	704.885	2	16
1	167.84	57.1	P02760	AMBP_HUMAN	Protein AMBP OS=Homo sapiens GN=AMBP PE=1 SV=1	0	99	AFIQLWAFDAVK			0.00103887	1407.76	704.885	1407.76	704.885	2	15
1	167.84	57.1	P02760	AMBP_HUMAN	Protein AMBP OS=Homo sapiens GN=AMBP PE=1 SV=1	0	99	AFIQLWAFDAVK			0.00164922	1407.76	704.886	1407.76	704.885	2	19
1	167.84	57.1	P02760	AMBP_HUMAN	Protein AMBP OS=Homo sapiens GN=AMBP PE=1 SV=1	0	99	AFIQLWAFDAVK			0.00140508	1407.76	704.885	1407.76	704.885	2	16
1	167.84	57.1	P02760	AMBP_HUMAN	Protein AMBP OS=Homo sapiens GN=AMBP PE=1 SV=1	0	99	AFIQLWAFDAVK	Oxidation(W)@6		0.00312986	1423.75	712.884	1423.75	712.882	2	14
1	167.84	57.1	P02760	AMBP_HUMAN	Protein AMBP OS=Homo sapiens GN=AMBP PE=1 SV=1	0	99	AFIQLWAFDAVK	Oxidation(W)@6		-0.00431641	1423.75	712.88	1423.75	712.882	2	13
1	167.84	57.1	P02760	AMBP_HUMAN	Protein AMBP OS=Homo sapiens GN=AMBP PE=1 SV=1	0	99	AFIQLWAFDAVK	Oxidation(W)@6		-0.000654313	1423.75	712.882	1423.75	712.882	2	13
1	167.84	57.1	P02760	AMBP_HUMAN	Protein AMBP OS=Homo sapiens GN=AMBP PE=1 SV=1	0	99	AFIQLWAFDAVK			-0.000717177	1407.75	704.885	1407.76	704.885	2	13
1	167.84	57.1	P02760	AMBP_HUMAN	Protein AMBP OS=Homo sapiens GN=AMBP PE=1 SV=1	0	99	AFIQLWAFDAVK			-0.000717177	1407.75	704.885	1407.76	704.885	2	18
1	167.84	57.1	P02760	AMBP_HUMAN	Protein AMBP OS=Homo sapiens GN=AMBP PE=1 SV=1	0	99	AFIQLWAFDAVK			0.00160214	1407.76	704.886	1407.76	704.885	2	14
1	167.84	57.1	P02760	AMBP_HUMAN	Protein AMBP OS=Homo sapiens GN=AMBP PE=1 SV=1	0	99	AFIQLWAFDAVK	Oxidation(W)@6		0.000606161	1423.75	712.883	1423.75	712.882	2	16
1	167.84	57.1	P02760	AMBP_HUMAN	Protein AMBP OS=Homo sapiens GN=AMBP PE=1 SV=1	0	99	AFIQLWAFDAVK	Oxidation(W)@6		-0.0015482	1423.75	712.881	1423.75	712.882	2	12
1	167.84	57.1	P02760	AMBP_HUMAN	Protein AMBP OS=Homo sapiens GN=AMBP PE=1 SV=1	0	99	AFIQLWAFDAVK	Oxidation(W)@6		0.00211389	1423.75	712.883	1423.75	712.882	2	12
1	167.84	57.1	P02760	AMBP_HUMAN	Protein AMBP OS=Homo sapiens GN=AMBP PE=1 SV=1	0	99	AFIQLWAFDAVK			0.000284775	1407.76	704.885	1407.76	704.885	2	15
1	167.84	57.1	P02760	AMBP_HUMAN	Protein AMBP OS=Homo sapiens GN=AMBP PE=1 SV=1	0	99	AFIQLWAFDAVK	Dioxidation(W)@6		0.000439935	1439.75	720.88	1439.74	720.88	2	14
1	167.84	57.1	P02760	AMBP_HUMAN	Protein AMBP OS=Homo sapiens GN=AMBP PE=1 SV=1	0	99	AFIQLWAFDAVK	Dioxidation(W)@6		0.000439935	1439.75	720.88	1439.74	720.88	2	17
1	167.84	57.1	P02760	AMBP_HUMAN	Protein AMBP OS=Homo sapiens GN=AMBP PE=1 SV=1	0	99	AFIQLWAFDAVK	Dioxidation(W)@6		-0.0024897	1439.74	720.879	1439.74	720.88	2	17
1	167.84	57.1	P02760	AMBP_HUMAN	Protein AMBP OS=Homo sapiens GN=AMBP PE=1 SV=1	0	99	AFIQLWAFDAVK	Dioxidation(W)@6		-0.0051752	1439.74	720.877	1439.74	720.88	2	13
1	167.84	57.1	P02760	AMBP_HUMAN	Protein AMBP OS=Homo sapiens GN=AMBP PE=1 SV=1	0	99	AFIQLWAFDAVK	Oxidation(W)@6		0.000645021	1423.75	712.883	1423.75	712.882	2	12
1	167.84	57.1	P02760	AMBP_HUMAN	Protein AMBP OS=Homo sapiens GN=AMBP PE=1 SV=1	0	99	AFIQLWAFDAVK	Oxidation(W)@6		0.000278817	1423.75	712.882	1423.75	712.882	2	14
1	167.84	57.1	P02760	AMBP_HUMAN	Protein AMBP OS=Homo sapiens GN=AMBP PE=1 SV=1	0	99	AFIQLWAFDAVK	Oxidation(W)@6		3.46805e-05	1423.75	712.882	1423.75	712.882	2	14
1	167.84	57.1	P02760	AMBP_HUMAN	Protein AMBP OS=Homo sapiens GN=AMBP PE=1 SV=1	0	99	AFIQLWAFDAVK	Oxidation(W)@6		3.46805e-05	1423.75	712.882	1423.75	712.882	2	13
1	167.84	57.1	P02760	AMBP_HUMAN	Protein AMBP OS=Homo sapiens GN=AMBP PE=1 SV=1	0	99	AFIQLWAFDAVK	Dioxidation(W)@6		0.00153855	1439.75	720.88	1439.74	720.88	2	17
1	167.84	57.1	P02760	AMBP_HUMAN	Protein AMBP OS=Homo sapiens GN=AMBP PE=1 SV=1	0	99	AFIQLWAFDAVK	Oxidation(W)@6		0.000645021	1423.75	712.883	1423.75	712.882	2	17
1	167.84	57.1	P02760	AMBP_HUMAN	Protein AMBP OS=Homo sapiens GN=AMBP PE=1 SV=1	0	99	AFIQLWAFDAVK	Dioxidation(W)@6		0.00153855	1439.75	720.88	1439.74	720.88	2	16
1	167.84	57.1	P02760	AMBP_HUMAN	Protein AMBP OS=Homo sapiens GN=AMBP PE=1 SV=1	0	99	AFIQLWAFDAVK	Oxidation(W)@6		0.000645021	1423.75	712.883	1423.75	712.882	2	16
1	167.84	57.1	P02760	AMBP_HUMAN	Protein AMBP OS=Homo sapiens GN=AMBP PE=1 SV=1	0	99	AFIQLWAFDAVK	Oxidation(W)@6		0.000278817	1423.75	712.882	1423.75	712.882	2	14
1	167.84	57.1	P02760	AMBP_HUMAN	Protein AMBP OS=Homo sapiens GN=AMBP PE=1 SV=1	0	99	AFIQLWAFDAVK	Oxidation(W)@6		-0.00533632	1423.74	712.88	1423.75	712.882	2	15
1	167.84	57.1	P02760	AMBP_HUMAN	Protein AMBP OS=Homo sapiens GN=AMBP PE=1 SV=1	0	99	AFIQLWAFDAVK	Oxidation(W)@6		0.000645021	1423.75	712.883	1423.75	712.882	2	14
1	167.84	57.1	P02760	AMBP_HUMAN	Protein AMBP OS=Homo sapiens GN=AMBP PE=1 SV=1	0	99	AFIQLWAFDAVK	Trp->Kynurenin(W)@6		0.00132248	1411.75	471.591	1411.75	471.591	3	15
1	167.84	57.1	P02760	AMBP_HUMAN	Protein AMBP OS=Homo sapiens GN=AMBP PE=1 SV=1	0	99	AFIQLWAFDAVK	Trp->Kynurenin(W)@6		0.00159713	1411.75	471.591	1411.75	471.591	3	15
1	167.84	57.1	P02760	AMBP_HUMAN	Protein AMBP OS=Homo sapiens GN=AMBP PE=1 SV=1	0	99	AFIQLWAFDAVK			-0.0031795	1407.75	704.883	1407.76	704.885	2	14
1	167.84	57.1	P02760	AMBP_HUMAN	Protein AMBP OS=Homo sapiens GN=AMBP PE=1 SV=1	0	99	AFIQLWAFDAVK			0.000116343	1407.76	704.885	1407.76	704.885	2	17
1	167.84	57.1	P02760	AMBP_HUMAN	Protein AMBP OS=Homo sapiens GN=AMBP PE=1 SV=1	0	99	AFIQLWAFDAVK			0.00109289	1407.76	704.885	1407.76	704.885	2	18
1	167.84	57.1	P02760	AMBP_HUMAN	Protein AMBP OS=Homo sapiens GN=AMBP PE=1 SV=1	0	99	AFIQLWAFDAVK	Cation:Na(D)@9		0.00215567	1429.74	715.877	1429.74	715.876	2	16
1	167.84	57.1	P02760	AMBP_HUMAN	Protein AMBP OS=Homo sapiens GN=AMBP PE=1 SV=1	0	99	AFIQLWAFDAVK			0.000726684	1407.76	704.885	1407.76	704.885	2	18
1	167.84	57.1	P02760	AMBP_HUMAN	Protein AMBP OS=Homo sapiens GN=AMBP PE=1 SV=1	0	99	AFIQLWAFDAVK	Cation:Na(D)@9		0.0023998	1429.74	715.877	1429.74	715.876	2	16
1	167.84	57.1	P02760	AMBP_HUMAN	Protein AMBP OS=Homo sapiens GN=AMBP PE=1 SV=1	0	99	AFIQLWAFDAVK			0.000482547	1407.76	704.885	1407.76	704.885	2	18
1	167.84	57.1	P02760	AMBP_HUMAN	Protein AMBP OS=Homo sapiens GN=AMBP PE=1 SV=1	0	99	AFIQLWAFDAVK			-0.00037193	1407.75	704.885	1407.76	704.885	2	16
1	167.84	57.1	P02760	AMBP_HUMAN	Protein AMBP OS=Homo sapiens GN=AMBP PE=1 SV=1	0	99	AFIQLWAFDAVK			-0.000127793	1407.76	704.885	1407.76	704.885	2	16
1	167.84	57.1	P02760	AMBP_HUMAN	Protein AMBP OS=Homo sapiens GN=AMBP PE=1 SV=1	0	99	AFIQLWAFDAVK			-0.000127793	1407.76	704.885	1407.76	704.885	2	14
1	167.84	57.1	P02760	AMBP_HUMAN	Protein AMBP OS=Homo sapiens GN=AMBP PE=1 SV=1	0	99	AFIQLWAFDAVK			0.00329011	1407.76	704.886	1407.76	704.885	2	14
1	167.84	57.1	P02760	AMBP_HUMAN	Protein AMBP OS=Homo sapiens GN=AMBP PE=1 SV=1	0	99	AFIQLWAFDAVK			-0.000493998	1407.75	704.885	1407.76	704.885	2	14
1	167.84	57.1	P02760	AMBP_HUMAN	Protein AMBP OS=Homo sapiens GN=AMBP PE=1 SV=1	0	99	AFIQLWAFDAVK			-0.000127793	1407.76	704.885	1407.76	704.885	2	14
1	167.84	57.1	P02760	AMBP_HUMAN	Protein AMBP OS=Homo sapiens GN=AMBP PE=1 SV=1	0	99	AFIQLWAFDAVK			-0.00232502	1407.75	704.884	1407.76	704.885	2	13
1	167.84	57.1	P02760	AMBP_HUMAN	Protein AMBP OS=Homo sapiens GN=AMBP PE=1 SV=1	0	99	AFIQLWAFDAVK			-0.0418751	1407.71	704.864	1407.76	704.885	2	11
1	167.84	57.1	P02760	AMBP_HUMAN	Protein AMBP OS=Homo sapiens GN=AMBP PE=1 SV=1	0	99	AFIQLWAFDAVK	Oxidation(W)@6		0.000388491	1423.75	712.882	1423.75	712.882	2	14
1	167.84	57.1	P02760	AMBP_HUMAN	Protein AMBP OS=Homo sapiens GN=AMBP PE=1 SV=1	0	99	AFIQLWAFDAVK	Oxidation(W)@6		-0.00498257	1423.75	712.88	1423.75	712.882	2	13
1	167.84	57.1	P02760	AMBP_HUMAN	Protein AMBP OS=Homo sapiens GN=AMBP PE=1 SV=1	0	99	AFIQLWAFDAVK	Oxidation(W)@6		0.00099884	1423.75	712.883	1423.75	712.882	2	12
1	167.84	57.1	P02760	AMBP_HUMAN	Protein AMBP OS=Homo sapiens GN=AMBP PE=1 SV=1	0	99	AFIQLWAFDAVK	Oxidation(W)@6		-0.00254118	1423.75	712.881	1423.75	712.882	2	13
1	167.84	57.1	P02760	AMBP_HUMAN	Protein AMBP OS=Homo sapiens GN=AMBP PE=1 SV=1	0	99	AFIQLWAFDAVK	Dioxidation(W)@6		0.00319707	1439.75	720.881	1439.74	720.88	2	13
1	167.84	57.1	P02760	AMBP_HUMAN	Protein AMBP OS=Homo sapiens GN=AMBP PE=1 SV=1	0	99	AFIQLWAFDAVK	Dioxidation(W)@6		0.00319707	1439.75	720.881	1439.74	720.88	2	14
1	167.84	57.1	P02760	AMBP_HUMAN	Protein AMBP OS=Homo sapiens GN=AMBP PE=1 SV=1	0	99	AFIQLWAFDAVK	Dioxidation(W)@6		0.00405156	1439.75	720.882	1439.74	720.88	2	15
1	167.84	57.1	P02760	AMBP_HUMAN	Protein AMBP OS=Homo sapiens GN=AMBP PE=1 SV=1	0	99	AFIQLWAFDAVK	Oxidation(W)@6		-0.0027413	1423.75	712.881	1423.75	712.882	2	12
1	167.84	57.1	P02760	AMBP_HUMAN	Protein AMBP OS=Homo sapiens GN=AMBP PE=1 SV=1	0	99	AFIQLWAFDAVK	Oxidation(W)@6		-0.00261923	1423.75	712.881	1423.75	712.882	2	17
1	167.84	57.1	P02760	AMBP_HUMAN	Protein AMBP OS=Homo sapiens GN=AMBP PE=1 SV=1	0	99	AFIQLWAFDAVK	Oxidation(W)@6		-0.00261923	1423.75	712.881	1423.75	712.882	2	16
1	167.84	57.1	P02760	AMBP_HUMAN	Protein AMBP OS=Homo sapiens GN=AMBP PE=1 SV=1	0	99	AFIQLWAFDAVK	Oxidation(W)@6		-0.0027413	1423.75	712.881	1423.75	712.882	2	14
1	167.84	57.1	P02760	AMBP_HUMAN	Protein AMBP OS=Homo sapiens GN=AMBP PE=1 SV=1	0	99	AFIQLWAFDAVK	Dioxidation(W)@6		0.000633617	1439.75	720.88	1439.74	720.88	2	15
1	167.84	57.1	P02760	AMBP_HUMAN	Protein AMBP OS=Homo sapiens GN=AMBP PE=1 SV=1	0	99	AFIQLWAFDAVK	Oxidation(W)@6		0.000676638	1423.75	712.883	1423.75	712.882	2	17
1	167.84	57.1	P02760	AMBP_HUMAN	Protein AMBP OS=Homo sapiens GN=AMBP PE=1 SV=1	0	99	AFIQLWAFDAVK	Dioxidation(W)@6		0.000633617	1439.75	720.88	1439.74	720.88	2	13
1	167.84	57.1	P02760	AMBP_HUMAN	Protein AMBP OS=Homo sapiens GN=AMBP PE=1 SV=1	0	99	AFIQLWAFDAVK	Oxidation(W)@6		0.00409458	1423.75	712.884	1423.75	712.882	2	16
1	167.84	57.1	P02760	AMBP_HUMAN	Protein AMBP OS=Homo sapiens GN=AMBP PE=1 SV=1	0	99	AFIQLWAFDAVK	Oxidation(W)@6		0.000798708	1423.75	712.883	1423.75	712.882	2	15
1	167.84	57.1	P02760	AMBP_HUMAN	Protein AMBP OS=Homo sapiens GN=AMBP PE=1 SV=1	0	99	AFIQLWAFDAVK	Oxidation(W)@6		0.0036063	1423.75	712.884	1423.75	712.882	2	14
1	167.84	57.1	P02760	AMBP_HUMAN	Protein AMBP OS=Homo sapiens GN=AMBP PE=1 SV=1	0	99	AFIQLWAFDAVK	Oxidation(W)@6		0.00348423	1423.75	712.884	1423.75	712.882	2	13
1	167.84	57.1	P02760	AMBP_HUMAN	Protein AMBP OS=Homo sapiens GN=AMBP PE=1 SV=1	0	99	AFIQLWAFDAVK	Trp->Kynurenin(W)@6		0.00472084	1411.75	471.592	1411.75	471.591	3	15
1	167.84	57.1	P02760	AMBP_HUMAN	Protein AMBP OS=Homo sapiens GN=AMBP PE=1 SV=1	0	99	AFIQLWAFDAVK	Trp->Kynurenin(W)@6		0.00472084	1411.75	471.592	1411.75	471.591	3	15
1	167.84	57.1	P02760	AMBP_HUMAN	Protein AMBP OS=Homo sapiens GN=AMBP PE=1 SV=1	0	99	AFIQLWAFDAVK			-2.01147	1405.74	703.879	1407.76	704.885	2	9
1	167.84	57.1	P02760	AMBP_HUMAN	Protein AMBP OS=Homo sapiens GN=AMBP PE=1 SV=1	0	99	AFIQLWAFDAVK			-1.01209	1406.74	704.379	1407.76	704.885	2	14
1	167.84	57.1	P02760	AMBP_HUMAN	Protein AMBP OS=Homo sapiens GN=AMBP PE=1 SV=1	0	99	AFIQLWAFDAVK	Oxidation(W)@6		0.000592941	1423.75	712.883	1423.75	712.882	2	13
1	167.84	57.1	P02760	AMBP_HUMAN	Protein AMBP OS=Homo sapiens GN=AMBP PE=1 SV=1	0	99	AFIQLWAFDAVK	Oxidation(W)@6		0.00083708	1423.75	712.883	1423.75	712.882	2	13
1	167.84	57.1	P02760	AMBP_HUMAN	Protein AMBP OS=Homo sapiens GN=AMBP PE=1 SV=1	0	99	AFIQLWAFDAVK	Oxidation(W)@6		0.00083708	1423.75	712.883	1423.75	712.882	2	13
1	167.84	57.1	P02760	AMBP_HUMAN	Protein AMBP OS=Homo sapiens GN=AMBP PE=1 SV=1	0	99	AFIQLWAFDAVK	Oxidation(W)@6		-0.00294707	1423.75	712.881	1423.75	712.882	2	13
1	167.84	57.1	P02760	AMBP_HUMAN	Protein AMBP OS=Homo sapiens GN=AMBP PE=1 SV=1	0	99	AFIQLWAFDAVK	Oxidation(W)@6		-1.74065e-05	1423.75	712.882	1423.75	712.882	2	14
1	167.84	57.1	P02760	AMBP_HUMAN	Protein AMBP OS=Homo sapiens GN=AMBP PE=1 SV=1	0	99	AFIQLWAFDAVK	Oxidation(W)@6		0.00279019	1423.75	712.884	1423.75	712.882	2	13
1	167.84	57.1	P02760	AMBP_HUMAN	Protein AMBP OS=Homo sapiens GN=AMBP PE=1 SV=1	0	99	AFIQLWAFDAVK	Oxidation(W)@6		0.000348802	1423.75	712.882	1423.75	712.882	2	13
1	167.84	57.1	P02760	AMBP_HUMAN	Protein AMBP OS=Homo sapiens GN=AMBP PE=1 SV=1	0	99	AFIQLWAFDAVK	Oxidation(W)@6		-0.002825	1423.75	712.881	1423.75	712.882	2	13
1	167.84	57.1	P02760	AMBP_HUMAN	Protein AMBP OS=Homo sapiens GN=AMBP PE=1 SV=1	0	99	AFIQLWAFDAVK	Oxidation(W)@6		-0.000126248	1423.75	712.882	1423.75	712.882	2	12
1	167.84	57.1	P02760	AMBP_HUMAN	Protein AMBP OS=Homo sapiens GN=AMBP PE=1 SV=1	0	99	AFIQLWAFDAVK	Oxidation(W)@6		0.000239956	1423.75	712.882	1423.75	712.882	2	12
1	167.84	57.1	P02760	AMBP_HUMAN	Protein AMBP OS=Homo sapiens GN=AMBP PE=1 SV=1	0	99	AFIQLWAFDAVK			-2.97973e-05	1407.76	704.885	1407.76	704.885	2	13
1	167.84	57.1	P02760	AMBP_HUMAN	Protein AMBP OS=Homo sapiens GN=AMBP PE=1 SV=1	0	99	AFIQLWAFDAVK			4.0636e-05	1407.76	704.885	1407.76	704.885	2	14
1	167.84	57.1	P02760	AMBP_HUMAN	Protein AMBP OS=Homo sapiens GN=AMBP PE=1 SV=1	0	99	AFIQLWAFDAVK	Oxidation(W)@6		-4.17975e-06	1423.75	712.882	1423.75	712.882	2	11
1	167.84	57.1	P02760	AMBP_HUMAN	Protein AMBP OS=Homo sapiens GN=AMBP PE=1 SV=1	0	99	AFIQLWAFDAVK	Oxidation(W)@6		0.000893193	1423.75	712.883	1423.75	712.882	2	12
1	167.84	57.1	P02760	AMBP_HUMAN	Protein AMBP OS=Homo sapiens GN=AMBP PE=1 SV=1	0	99	AFIQLWAFDAVK	Oxidation(W)@6		-0.000370384	1423.75	712.882	1423.75	712.882	2	14
1	167.84	57.1	P02760	AMBP_HUMAN	Protein AMBP OS=Homo sapiens GN=AMBP PE=1 SV=1	0	99	AFIQLWAFDAVK	Oxidation(W)@6		-0.00167027	1423.75	712.881	1423.75	712.882	2	12
1	167.84	57.1	P02760	AMBP_HUMAN	Protein AMBP OS=Homo sapiens GN=AMBP PE=1 SV=1	0	99	AFIQLWAFDAVK	Oxidation(W)@6		0.000484093	1423.75	712.883	1423.75	712.882	2	13
1	167.84	57.1	P02760	AMBP_HUMAN	Protein AMBP OS=Homo sapiens GN=AMBP PE=1 SV=1	0	99	AFIQLWAFDAVKGK		missed K-G@12	0.00247955	1592.87	531.965	1592.87	531.964	3	16
1	167.84	57.1	P02760	AMBP_HUMAN	Protein AMBP OS=Homo sapiens GN=AMBP PE=1 SV=1	0	99	AFIQLWAFDAVKGK		missed K-G@12	0.002657	1592.87	531.965	1592.87	531.964	3	15
1	167.84	57.1	P02760	AMBP_HUMAN	Protein AMBP OS=Homo sapiens GN=AMBP PE=1 SV=1	0	99	AFIQLWAFDAVKGK	Carbamidomethyl(K)@14	missed K-G@12	0.00465687	1649.9	550.973	1649.89	550.972	3	18
1	167.84	57.1	P02760	AMBP_HUMAN	Protein AMBP OS=Homo sapiens GN=AMBP PE=1 SV=1	0	99	AFIQLWAFDAVKGK		missed K-G@12	0.002657	1592.87	531.965	1592.87	531.964	3	17
1	167.84	57.1	P02760	AMBP_HUMAN	Protein AMBP OS=Homo sapiens GN=AMBP PE=1 SV=1	0	99	AVLPQEEEGSGGGQLVTEVTK	Dehydrated(S)@10		0.00329955	2109.06	704.028	2109.06	704.027	3	28
1	167.84	57.1	P02760	AMBP_HUMAN	Protein AMBP OS=Homo sapiens GN=AMBP PE=1 SV=1	0	99	AVLPQEEEGSGGGQLVTEVTK	Dehydrated(S)@10		0.00436273	2109.06	704.028	2109.06	704.027	3	27
1	167.84	57.1	P02760	AMBP_HUMAN	Protein AMBP OS=Homo sapiens GN=AMBP PE=1 SV=1	0	99	AVLPQEEEGSGGGQLVTEVTK	Dehydrated(S)@10		0.005382	2109.06	704.029	2109.06	704.027	3	26
1	167.84	57.1	P02760	AMBP_HUMAN	Protein AMBP OS=Homo sapiens GN=AMBP PE=1 SV=1	0	99	AVLPQEEEGSGGGQLVTEVTK	Dehydrated(S)@10		0.0053772	2109.06	704.029	2109.06	704.027	3	25
1	167.84	57.1	P02760	AMBP_HUMAN	Protein AMBP OS=Homo sapiens GN=AMBP PE=1 SV=1	0	99	AVLPQEEEGSGGGQLVTEVTK	Dehydrated(S)@10		0.00729829	2109.07	704.029	2109.06	704.027	3	24
1	167.84	57.1	P02760	AMBP_HUMAN	Protein AMBP OS=Homo sapiens GN=AMBP PE=1 SV=1	0	99	AVLPQEEEGSGGGQLVTEVTK	Dehydrated(S)@10		0.00524693	2109.06	704.029	2109.06	704.027	3	25
1	167.84	57.1	P02760	AMBP_HUMAN	Protein AMBP OS=Homo sapiens GN=AMBP PE=1 SV=1	0	99	AVLPQEEEGSGGGQLVTEVTK	Dehydrated(S)@10		0.00524693	2109.06	704.029	2109.06	704.027	3	26
1	167.84	57.1	P02760	AMBP_HUMAN	Protein AMBP OS=Homo sapiens GN=AMBP PE=1 SV=1	0	99	AVLPQEEEGSGGGQLVTEVTK	Dehydrated(S)@10		0.00728153	2109.07	704.029	2109.06	704.027	3	26
1	167.84	57.1	P02760	AMBP_HUMAN	Protein AMBP OS=Homo sapiens GN=AMBP PE=1 SV=1	0	99	AVLPQEEEGSGGGQLVTEVTK	Dehydrated(S)@10		0.00691532	2109.07	704.029	2109.06	704.027	3	26
1	167.84	57.1	P02760	AMBP_HUMAN	Protein AMBP OS=Homo sapiens GN=AMBP PE=1 SV=1	0	99	AVLPQEEEGSGGGQLVTEVTK	Dehydrated(S)@10		0.0108858	2109.07	704.031	2109.06	704.027	3	24
1	167.84	57.1	P02760	AMBP_HUMAN	Protein AMBP OS=Homo sapiens GN=AMBP PE=1 SV=1	0	99	AVLPQEEEGSGGGQLVTEVTK	Dehydrated(S)@10		0.00122268	2109.06	704.027	2109.06	704.027	3	26
1	167.84	57.1	P02760	AMBP_HUMAN	Protein AMBP OS=Homo sapiens GN=AMBP PE=1 SV=1	0	99	AVLPQEEEGSGGGQLVTEVTK	Cation:Na(E)@8; Dehydrated(S)@10		0.00972316	2131.05	711.357	2131.04	711.354	3	15
1	167.84	57.1	P02760	AMBP_HUMAN	Protein AMBP OS=Homo sapiens GN=AMBP PE=1 SV=1	0	99	AVLPQEEEGSGGGQLVTEVTK	Dehydrated(S)@10		0.00122268	2109.06	704.027	2109.06	704.027	3	26
1	167.84	57.1	P02760	AMBP_HUMAN	Protein AMBP OS=Homo sapiens GN=AMBP PE=1 SV=1	0	99	AVLPQEEEGSGGGQLVTEVTK	Dehydrated(S)@10		0.00506659	2109.06	704.029	2109.06	704.027	3	25
1	167.84	57.1	P02760	AMBP_HUMAN	Protein AMBP OS=Homo sapiens GN=AMBP PE=1 SV=1	0	99	CNLPIVR	Carbamidomethyl(C)@1	cleaved A-C@N-term	2.17616e-06	870.475	436.245	870.475	436.245	2	7
1	167.84	57.1	P02760	AMBP_HUMAN	Protein AMBP OS=Homo sapiens GN=AMBP PE=1 SV=1	0	99	CNLPIVR	Carbamidomethyl(C)@1	cleaved A-C@N-term	-0.00243851	870.472	436.243	870.475	436.245	2	8
1	167.84	57.1	P02760	AMBP_HUMAN	Protein AMBP OS=Homo sapiens GN=AMBP PE=1 SV=1	0	99	CNLPIVR	Carbamidomethyl(C)@1	cleaved A-C@N-term	-0.00214754	870.472	436.243	870.475	436.245	2	8
1	167.84	57.1	P02760	AMBP_HUMAN	Protein AMBP OS=Homo sapiens GN=AMBP PE=1 SV=1	0	99	CNLPIVR	Carbamidomethyl(C)@1	cleaved A-C@N-term	-0.00214754	870.472	436.243	870.475	436.245	2	8
1	167.84	57.1	P02760	AMBP_HUMAN	Protein AMBP OS=Homo sapiens GN=AMBP PE=1 SV=1	0	99	CNLPIVR	Carbamidomethyl(C)@1	cleaved A-C@N-term	-0.000277113	870.474	436.244	870.475	436.245	2	8
1	167.84	57.1	P02760	AMBP_HUMAN	Protein AMBP OS=Homo sapiens GN=AMBP PE=1 SV=1	0	99	CNLPIVR	Carbamidomethyl(C)@1	cleaved A-C@N-term	0.00537611	870.48	436.247	870.475	436.245	2	7
1	167.84	57.1	P02760	AMBP_HUMAN	Protein AMBP OS=Homo sapiens GN=AMBP PE=1 SV=1	0	99	CVLFPY	Carbamidomethyl(C)@1	cleaved Y-G@C-term	-0.00145088	797.377	399.696	797.378	399.696	2	7
1	167.84	57.1	P02760	AMBP_HUMAN	Protein AMBP OS=Homo sapiens GN=AMBP PE=1 SV=1	0	99	CVLFPY	Carbamidomethyl(C)@1	cleaved Y-G@C-term	-0.000956086	797.377	399.696	797.378	399.696	2	6
1	167.84	57.1	P02760	AMBP_HUMAN	Protein AMBP OS=Homo sapiens GN=AMBP PE=1 SV=1	0	99	CVLFPYG	Carbamidomethyl(C)@1	cleaved G-G@C-term	0.000722215	854.4	428.207	854.4	428.207	2	7
1	167.84	57.1	P02760	AMBP_HUMAN	Protein AMBP OS=Homo sapiens GN=AMBP PE=1 SV=1	0	99	CVLFPYG	Carbamidomethyl(C)@1	cleaved G-G@C-term	0.00187464	854.401	428.208	854.4	428.207	2	8
1	167.84	57.1	P02760	AMBP_HUMAN	Protein AMBP OS=Homo sapiens GN=AMBP PE=1 SV=1	0	99	CVLFPYG	Carbamidomethyl(C)@1	cleaved G-G@C-term	-0.000125571	854.399	428.207	854.4	428.207	2	7
1	167.84	57.1	P02760	AMBP_HUMAN	Protein AMBP OS=Homo sapiens GN=AMBP PE=1 SV=1	0	99	CVLFPYG	Carbamidomethyl(C)@1	cleaved G-G@C-term	0.000636041	854.4	428.207	854.4	428.207	2	7
1	167.84	57.1	P02760	AMBP_HUMAN	Protein AMBP OS=Homo sapiens GN=AMBP PE=1 SV=1	0	99	CVLFPYG	Carbamidomethyl(C)@1	cleaved G-G@C-term	-0.000258476	854.399	428.207	854.4	428.207	2	7
1	167.84	57.1	P02760	AMBP_HUMAN	Protein AMBP OS=Homo sapiens GN=AMBP PE=1 SV=1	0	99	CVLFPYGG	Carbamidomethyl(C)@1	cleaved G-C@C-term	-0.00115244	911.42	456.717	911.421	456.718	2	9
1	167.84	57.1	P02760	AMBP_HUMAN	Protein AMBP OS=Homo sapiens GN=AMBP PE=1 SV=1	0	99	CVLFPYGG	Carbamidomethyl(C)@1	cleaved G-C@C-term	-0.000876813	911.42	456.717	911.421	456.718	2	7
1	167.84	57.1	P02760	AMBP_HUMAN	Protein AMBP OS=Homo sapiens GN=AMBP PE=1 SV=1	0	99	CVLFPYGG	Carbamidomethyl(C)@1	cleaved G-C@C-term	-0.000876813	911.42	456.717	911.421	456.718	2	11
1	167.84	57.1	P02760	AMBP_HUMAN	Protein AMBP OS=Homo sapiens GN=AMBP PE=1 SV=1	0	99	CVLFPYGG	Carbamidomethyl(C)@1	cleaved G-C@C-term	-0.000876813	911.42	456.717	911.421	456.718	2	11
1	167.84	57.1	P02760	AMBP_HUMAN	Protein AMBP OS=Homo sapiens GN=AMBP PE=1 SV=1	0	99	CVLFPYGG	Carbamidomethyl(C)@1	cleaved G-C@C-term	-0.00204191	911.419	456.717	911.421	456.718	2	10
1	167.84	57.1	P02760	AMBP_HUMAN	Protein AMBP OS=Homo sapiens GN=AMBP PE=1 SV=1	0	99	CVLFPYGG	Carbamidomethyl(C)@1	cleaved G-C@C-term	0.000602474	911.422	456.718	911.421	456.718	2	9
1	167.84	57.1	P02760	AMBP_HUMAN	Protein AMBP OS=Homo sapiens GN=AMBP PE=1 SV=1	0	99	CVLFPYGG	Carbamidomethyl(C)@1	cleaved G-C@C-term	-0.00259178	911.419	456.717	911.421	456.718	2	10
1	167.84	57.1	P02760	AMBP_HUMAN	Protein AMBP OS=Homo sapiens GN=AMBP PE=1 SV=1	0	99	CVLFPYGG	Carbamidomethyl(C)@1	cleaved G-C@C-term	-0.00259178	911.419	456.717	911.421	456.718	2	9
1	167.84	57.1	P02760	AMBP_HUMAN	Protein AMBP OS=Homo sapiens GN=AMBP PE=1 SV=1	0	99	CVLFPYGG	Carbamidomethyl(C)@1	cleaved G-C@C-term	-0.000781658	911.42	456.717	911.421	456.718	2	10
1	167.84	57.1	P02760	AMBP_HUMAN	Protein AMBP OS=Homo sapiens GN=AMBP PE=1 SV=1	0	99	CVLFPYGG	Carbamidomethyl(C)@1	cleaved G-C@C-term	-0.000781658	911.42	456.717	911.421	456.718	2	11
1	167.84	57.1	P02760	AMBP_HUMAN	Protein AMBP OS=Homo sapiens GN=AMBP PE=1 SV=1	0	99	CVLFPYGG	Carbamidomethyl(C)@1	cleaved G-C@C-term	-0.00372536	911.417	456.716	911.421	456.718	2	10
1	167.84	57.1	P02760	AMBP_HUMAN	Protein AMBP OS=Homo sapiens GN=AMBP PE=1 SV=1	0	99	CVLFPYGG	Carbamidomethyl(C)@1	cleaved G-C@C-term	-0.00372536	911.417	456.716	911.421	456.718	2	9
1	167.84	57.1	P02760	AMBP_HUMAN	Protein AMBP OS=Homo sapiens GN=AMBP PE=1 SV=1	0	99	CVLFPYGG	Carbamidomethyl(C)@1	cleaved G-C@C-term	-0.00132309	911.42	456.717	911.421	456.718	2	10
1	167.84	57.1	P02760	AMBP_HUMAN	Protein AMBP OS=Homo sapiens GN=AMBP PE=1 SV=1	0	99	CVLFPYGG	Carbamidomethyl(C)@1	cleaved G-C@C-term	-0.00132309	911.42	456.717	911.421	456.718	2	11
1	167.84	57.1	P02760	AMBP_HUMAN	Protein AMBP OS=Homo sapiens GN=AMBP PE=1 SV=1	0	99	CVLFPYGG	Carbamidomethyl(C)@1	cleaved G-C@C-term	-0.00132309	911.42	456.717	911.421	456.718	2	11
1	167.84	57.1	P02760	AMBP_HUMAN	Protein AMBP OS=Homo sapiens GN=AMBP PE=1 SV=1	0	99	CVLFPYGG	Carbamidomethyl(C)@1	cleaved G-C@C-term	0.000846613	911.422	456.718	911.421	456.718	2	9
1	167.84	57.1	P02760	AMBP_HUMAN	Protein AMBP OS=Homo sapiens GN=AMBP PE=1 SV=1	0	99	CVLFPYGG	Carbamidomethyl(C)@1	cleaved G-C@C-term	-0.00179777	911.419	456.717	911.421	456.718	2	10
1	167.84	57.1	P02760	AMBP_HUMAN	Protein AMBP OS=Homo sapiens GN=AMBP PE=1 SV=1	0	99	CVLFPYGG	Carbamidomethyl(C)@1	cleaved G-C@C-term	-0.00187444	911.419	456.717	911.421	456.718	2	10
1	167.84	57.1	P02760	AMBP_HUMAN	Protein AMBP OS=Homo sapiens GN=AMBP PE=1 SV=1	0	99	CVLFPYGG	Carbamidomethyl(C)@1	cleaved G-C@C-term	-0.00187444	911.419	456.717	911.421	456.718	2	11
1	167.84	57.1	P02760	AMBP_HUMAN	Protein AMBP OS=Homo sapiens GN=AMBP PE=1 SV=1	0	99	CVLFPYGG	Carbamidomethyl(C)@1	cleaved G-C@C-term	-0.00187444	911.419	456.717	911.421	456.718	2	9
1	167.84	57.1	P02760	AMBP_HUMAN	Protein AMBP OS=Homo sapiens GN=AMBP PE=1 SV=1	0	99	CVLFPYGG	Carbamidomethyl(C)@1	cleaved G-C@C-term	-0.00134152	911.42	456.717	911.421	456.718	2	11
1	167.84	57.1	P02760	AMBP_HUMAN	Protein AMBP OS=Homo sapiens GN=AMBP PE=1 SV=1	0	99	CVLFPYGG	Carbamidomethyl(C)@1; Amidated@C-term	cleaved G-C@C-term	-0.00125192	910.436	456.225	910.437	456.226	2	10
1	167.84	57.1	P02760	AMBP_HUMAN	Protein AMBP OS=Homo sapiens GN=AMBP PE=1 SV=1	0	99	CVLFPYGG	Carbamidomethyl(C)@1	cleaved G-C@C-term	-0.00134152	911.42	456.717	911.421	456.718	2	9
1	167.84	57.1	P02760	AMBP_HUMAN	Protein AMBP OS=Homo sapiens GN=AMBP PE=1 SV=1	0	99	CVLFPYGG	Carbamidomethyl(C)@1; Amidated@C-term	cleaved G-C@C-term	-0.00198172	910.435	456.225	910.437	456.226	2	9
1	167.84	57.1	P02760	AMBP_HUMAN	Protein AMBP OS=Homo sapiens GN=AMBP PE=1 SV=1	0	99	CVLFPYGG	Carbamidomethyl(C)@1	cleaved G-C@C-term	-0.00134152	911.42	456.717	911.421	456.718	2	9
1	167.84	57.1	P02760	AMBP_HUMAN	Protein AMBP OS=Homo sapiens GN=AMBP PE=1 SV=1	0	99	CVLFPYGG	Carbamidomethyl(C)@1	cleaved G-C@C-term	-0.000801949	911.42	456.717	911.421	456.718	2	11
1	167.84	57.1	P02760	AMBP_HUMAN	Protein AMBP OS=Homo sapiens GN=AMBP PE=1 SV=1	0	99	CVLFPYGGC	Carbamidomethyl(C)@1; Carbamidomethyl(C)@9	cleaved C-Q@C-term	-0.00175875	1071.45	536.732	1071.45	536.733	2	13
1	167.84	57.1	P02760	AMBP_HUMAN	Protein AMBP OS=Homo sapiens GN=AMBP PE=1 SV=1	0	99	CVLFPYGGC	Carbamidomethyl(C)@1; Carbamidomethyl(C)@9	cleaved C-Q@C-term	0.00113742	1071.45	536.734	1071.45	536.733	2	13
1	167.84	57.1	P02760	AMBP_HUMAN	Protein AMBP OS=Homo sapiens GN=AMBP PE=1 SV=1	0	99	CVLFPYGGC	Carbamidomethyl(C)@1; Carbamidomethyl(C)@9	cleaved C-Q@C-term	0.00113742	1071.45	536.734	1071.45	536.733	2	13
1	167.84	57.1	P02760	AMBP_HUMAN	Protein AMBP OS=Homo sapiens GN=AMBP PE=1 SV=1	0	99	CVLFPYGGC	Carbamidomethyl(C)@1; Carbamidomethyl(C)@9	cleaved C-Q@C-term	-0.0015484	1071.45	536.732	1071.45	536.733	2	13
1	167.84	57.1	P02760	AMBP_HUMAN	Protein AMBP OS=Homo sapiens GN=AMBP PE=1 SV=1	0	99	CVLFPYGGC	Carbamidomethyl(C)@1; Carbamidomethyl(C)@9	cleaved C-Q@C-term	-0.0015484	1071.45	536.732	1071.45	536.733	2	13
1	167.84	57.1	P02760	AMBP_HUMAN	Protein AMBP OS=Homo sapiens GN=AMBP PE=1 SV=1	0	99	CVLFPYGGC	Carbamidomethyl(C)@1; Carbamidomethyl(C)@9	cleaved C-Q@C-term	-0.00106961	1071.45	536.733	1071.45	536.733	2	13
1	167.84	57.1	P02760	AMBP_HUMAN	Protein AMBP OS=Homo sapiens GN=AMBP PE=1 SV=1	0	99	CVLFPYGGC	Carbamidomethyl(C)@1; Carbamidomethyl(C)@9	cleaved C-Q@C-term	-0.00122443	1071.45	536.732	1071.45	536.733	2	13
1	167.84	57.1	P02760	AMBP_HUMAN	Protein AMBP OS=Homo sapiens GN=AMBP PE=1 SV=1	0	99	CVLFPYGGC	Carbamidomethyl(C)@1; Carbamidomethyl(C)@9	cleaved C-Q@C-term	-0.00175875	1071.45	536.732	1071.45	536.733	2	13
1	167.84	57.1	P02760	AMBP_HUMAN	Protein AMBP OS=Homo sapiens GN=AMBP PE=1 SV=1	0	99	CVLFPYGGC	Carbamidomethyl(C)@1; Carbamidomethyl(C)@9	cleaved C-Q@C-term	0.00115463	1071.45	536.734	1071.45	536.733	2	13
1	167.84	57.1	P02760	AMBP_HUMAN	Protein AMBP OS=Homo sapiens GN=AMBP PE=1 SV=1	0	99	CVLFPYGGC	Carbamidomethyl(C)@1; Carbamidomethyl(C)@9	cleaved C-Q@C-term	-0.00296962	1071.45	536.732	1071.45	536.733	2	13
1	167.84	57.1	P02760	AMBP_HUMAN	Protein AMBP OS=Homo sapiens GN=AMBP PE=1 SV=1	0	99	CVLFPYGGC	Carbamidomethyl(C)@1; Carbamidomethyl(C)@9	cleaved C-Q@C-term	-0.00268927	1071.45	536.732	1071.45	536.733	2	13
1	167.84	57.1	P02760	AMBP_HUMAN	Protein AMBP OS=Homo sapiens GN=AMBP PE=1 SV=1	0	99	CVLFPYGGC	Carbamidomethyl(C)@1; Carbamidomethyl(C)@9	cleaved C-Q@C-term	0.00115463	1071.45	536.734	1071.45	536.733	2	12
1	167.84	57.1	P02760	AMBP_HUMAN	Protein AMBP OS=Homo sapiens GN=AMBP PE=1 SV=1	0	99	CVLFPYGGC	Carbamidomethyl(C)@1; Carbamidomethyl(C)@9	cleaved C-Q@C-term	-0.00182026	1071.45	536.732	1071.45	536.733	2	12
1	167.84	57.1	P02760	AMBP_HUMAN	Protein AMBP OS=Homo sapiens GN=AMBP PE=1 SV=1	0	99	CVLFPYGGC	Carbamidomethyl(C)@1; Carbamidomethyl(C)@9	cleaved C-Q@C-term	-0.00138476	1071.45	536.732	1071.45	536.733	2	13
1	167.84	57.1	P02760	AMBP_HUMAN	Protein AMBP OS=Homo sapiens GN=AMBP PE=1 SV=1	0	99	CVLFPYGGC	Carbamidomethyl(C)@1; Carbamidomethyl(C)@9	cleaved C-Q@C-term	-0.00175097	1071.45	536.732	1071.45	536.733	2	12
1	167.84	57.1	P02760	AMBP_HUMAN	Protein AMBP OS=Homo sapiens GN=AMBP PE=1 SV=1	0	99	CVLFPYGGCQG	Carbamidomethyl(C)@1; Carbamidomethyl(C)@9	cleaved G-N@C-term	-0.00109022	1256.53	629.273	1256.53	629.273	2	15
1	167.84	57.1	P02760	AMBP_HUMAN	Protein AMBP OS=Homo sapiens GN=AMBP PE=1 SV=1	0	99	CVLFPYGGCQGN	Carbamidomethyl(C)@1; Carbamidomethyl(C)@9	cleaved N-G@C-term	0.00207375	1370.58	686.296	1370.57	686.295	2	17
1	167.84	57.1	P02760	AMBP_HUMAN	Protein AMBP OS=Homo sapiens GN=AMBP PE=1 SV=1	0	99	CVLFPYGGCQGN	Carbamidomethyl(C)@1; Carbamidomethyl(C)@9	cleaved N-G@C-term	-0.00373313	1370.57	686.293	1370.57	686.295	2	17
1	167.84	57.1	P02760	AMBP_HUMAN	Protein AMBP OS=Homo sapiens GN=AMBP PE=1 SV=1	0	99	CVLFPYGGCQGN	Carbamidomethyl(C)@1; Carbamidomethyl(C)@9	cleaved N-G@C-term	-0.00373313	1370.57	686.293	1370.57	686.295	2	17
1	167.84	57.1	P02760	AMBP_HUMAN	Protein AMBP OS=Homo sapiens GN=AMBP PE=1 SV=1	0	99	CVLFPYGGCQGN	Carbamidomethyl(C)@1; Carbamidomethyl(C)@9	cleaved N-G@C-term	0.000796689	1370.58	686.295	1370.57	686.295	2	16
1	167.84	57.1	P02760	AMBP_HUMAN	Protein AMBP OS=Homo sapiens GN=AMBP PE=1 SV=1	0	99	CVLFPYGGCQGN	Carbamidomethyl(C)@1; Carbamidomethyl(C)@9	cleaved N-G@C-term	0.00139673	1370.58	686.295	1370.57	686.295	2	18
1	167.84	57.1	P02760	AMBP_HUMAN	Protein AMBP OS=Homo sapiens GN=AMBP PE=1 SV=1	0	99	CVLFPYGGCQGN	Carbamidomethyl(C)@1; Carbamidomethyl(C)@9	cleaved N-G@C-term	0.00139673	1370.58	686.295	1370.57	686.295	2	18
1	167.84	57.1	P02760	AMBP_HUMAN	Protein AMBP OS=Homo sapiens GN=AMBP PE=1 SV=1	0	99	CVLFPYGGCQGN	Carbamidomethyl(C)@1; Carbamidomethyl(C)@9	cleaved N-G@C-term	0.00185019	1370.58	686.296	1370.57	686.295	2	18
1	167.84	57.1	P02760	AMBP_HUMAN	Protein AMBP OS=Homo sapiens GN=AMBP PE=1 SV=1	0	99	CVLFPYGGCQGN	Carbamidomethyl(C)@1; Carbamidomethyl(C)@9	cleaved N-G@C-term	0.00185019	1370.58	686.296	1370.57	686.295	2	17
1	167.84	57.1	P02760	AMBP_HUMAN	Protein AMBP OS=Homo sapiens GN=AMBP PE=1 SV=1	0	99	CVLFPYGGCQGN	Carbamidomethyl(C)@1; Carbamidomethyl(C)@9	cleaved N-G@C-term	-0.00273528	1370.57	686.293	1370.57	686.295	2	17
1	167.84	57.1	P02760	AMBP_HUMAN	Protein AMBP OS=Homo sapiens GN=AMBP PE=1 SV=1	0	99	CVLFPYGGCQGN	Carbamidomethyl(C)@1; Carbamidomethyl(C)@9	cleaved N-G@C-term	-0.00273528	1370.57	686.293	1370.57	686.295	2	17
1	167.84	57.1	P02760	AMBP_HUMAN	Protein AMBP OS=Homo sapiens GN=AMBP PE=1 SV=1	0	99	CVLFPYGGCQGN	Carbamidomethyl(C)@1; Carbamidomethyl(C)@9	cleaved N-G@C-term	-0.00169133	1370.57	686.294	1370.57	686.295	2	16
1	167.84	57.1	P02760	AMBP_HUMAN	Protein AMBP OS=Homo sapiens GN=AMBP PE=1 SV=1	0	99	CVLFPYGGCQGN	Carbamidomethyl(C)@1; Carbamidomethyl(C)@9	cleaved N-G@C-term	5.86343e-05	1370.57	686.295	1370.57	686.295	2	15
1	167.84	57.1	P02760	AMBP_HUMAN	Protein AMBP OS=Homo sapiens GN=AMBP PE=1 SV=1	0	99	CVLFPYGGCQGN	Carbamidomethyl(C)@1; Carbamidomethyl(C)@9	cleaved N-G@C-term	5.86343e-05	1370.57	686.295	1370.57	686.295	2	18
1	167.84	57.1	P02760	AMBP_HUMAN	Protein AMBP OS=Homo sapiens GN=AMBP PE=1 SV=1	0	99	CVLFPYGGCQGN	Carbamidomethyl(C)@1; Carbamidomethyl(C)@9	cleaved N-G@C-term	0.000186858	1370.57	686.295	1370.57	686.295	2	17
1	167.84	57.1	P02760	AMBP_HUMAN	Protein AMBP OS=Homo sapiens GN=AMBP PE=1 SV=1	0	99	CVLFPYGGCQGN	Carbamidomethyl(C)@1; Carbamidomethyl(C)@9	cleaved N-G@C-term	0.000186858	1370.57	686.295	1370.57	686.295	2	15
1	167.84	57.1	P02760	AMBP_HUMAN	Protein AMBP OS=Homo sapiens GN=AMBP PE=1 SV=1	0	99	CVLFPYGGCQGN	Carbamidomethyl(C)@1; Carbamidomethyl(C)@9	cleaved N-G@C-term	0.00316506	1370.58	686.296	1370.57	686.295	2	19
1	167.84	57.1	P02760	AMBP_HUMAN	Protein AMBP OS=Homo sapiens GN=AMBP PE=1 SV=1	0	99	CVLFPYGGCQGNGNK	Carbamidomethyl(C)@1; Carbamidomethyl(C)@9		0.00307853	1669.74	557.586	1669.73	557.585	3	22
1	167.84	57.1	P02760	AMBP_HUMAN	Protein AMBP OS=Homo sapiens GN=AMBP PE=1 SV=1	0	99	CVLFPYGGCQGNGNK	Carbamidomethyl(C)@1; Carbamidomethyl(C)@9; Deamidated(N)@12		0.00764799	1670.73	557.916	1670.72	557.913	3	22
1	167.84	57.1	P02760	AMBP_HUMAN	Protein AMBP OS=Homo sapiens GN=AMBP PE=1 SV=1	0	99	CVLFPYGGCQGNGNK	Carbamidomethyl(C)@1; Carbamidomethyl(C)@9; Deamidated(N)@12		0.0078311	1670.73	557.916	1670.72	557.913	3	22
1	167.84	57.1	P02760	AMBP_HUMAN	Protein AMBP OS=Homo sapiens GN=AMBP PE=1 SV=1	0	99	CVLFPYGGCQGNGNK	Carbamidomethyl(C)@1; Carbamidomethyl(C)@9; Deamidated(N)@12		0.0078311	1670.73	557.916	1670.72	557.913	3	23
1	167.84	57.1	P02760	AMBP_HUMAN	Protein AMBP OS=Homo sapiens GN=AMBP PE=1 SV=1	0	99	CVLFPYGGCQGNGNK	Carbamidomethyl(C)@1; Carbamidomethyl(C)@9; Deamidated(N)@12		0.00764799	1670.73	557.916	1670.72	557.913	3	20
1	167.84	57.1	P02760	AMBP_HUMAN	Protein AMBP OS=Homo sapiens GN=AMBP PE=1 SV=1	0	99	CVLFPYGGCQGNGNK	Carbamidomethyl(C)@1; Carbamidomethyl(C)@9; Cation:Na@C-term		0.00445924	1691.72	564.914	1691.72	564.913	3	14
1	167.84	57.1	P02760	AMBP_HUMAN	Protein AMBP OS=Homo sapiens GN=AMBP PE=1 SV=1	0	99	CVLFPYGGCQGNGNK	Carbamidomethyl(C)@1; Pro->pyro-Glu(P)@5; Carbamidomethyl(C)@9		0.0384449	1683.75	562.258	1683.71	562.245	3	13
1	167.84	57.1	P02760	AMBP_HUMAN	Protein AMBP OS=Homo sapiens GN=AMBP PE=1 SV=1	0	99	CVLFPYGGCQGNGNK	Carbamidomethyl(C)@1; Carbamidomethyl(C)@9; Deamidated(N)@12; Cation:Na@C-term		0.00188212	1692.7	565.241	1692.7	565.241	3	14
1	167.84	57.1	P02760	AMBP_HUMAN	Protein AMBP OS=Homo sapiens GN=AMBP PE=1 SV=1	0	99	CVLFPYGGCQGNGNK	Carbamidomethyl(C)@1; Pro->pyro-Glu(P)@5; Carbamidomethyl(C)@9; Deamidated(N)@12		0.0424596	1684.74	562.587	1684.7	562.573	3	13
1	167.84	57.1	P02760	AMBP_HUMAN	Protein AMBP OS=Homo sapiens GN=AMBP PE=1 SV=1	0	99	CVLFPYGGCQGNGNK	Carbamidomethyl(C)@1; Pro->pyro-Glu(P)@5; Carbamidomethyl(C)@9; Deamidated(N)@12		0.0424596	1684.74	562.587	1684.7	562.573	3	13
1	167.84	57.1	P02760	AMBP_HUMAN	Protein AMBP OS=Homo sapiens GN=AMBP PE=1 SV=1	0	99	CVLFPYGGCQGNGNK	Carbamidomethyl(C)@1; Carbamidomethyl(C)@9; Deamidated(Q)@10; Deamidated(N)@12		0.00270376	1671.7	558.242	1671.7	558.241	3	18
1	167.84	57.1	P02760	AMBP_HUMAN	Protein AMBP OS=Homo sapiens GN=AMBP PE=1 SV=1	0	99	CVLFPYGGCQGNGNK	Carbamidomethyl(C)@1; Carbamidomethyl(C)@9; Ammonia-loss(N)@12		-0.000381627	1652.71	827.361	1652.71	827.361	2	12
1	167.84	57.1	P02760	AMBP_HUMAN	Protein AMBP OS=Homo sapiens GN=AMBP PE=1 SV=1	0	99	CVLFPYGGCQGNGNK	Carbamidomethyl(C)@1; Carbamidomethyl(C)@9		0.00539603	1669.74	557.587	1669.73	557.585	3	20
1	167.84	57.1	P02760	AMBP_HUMAN	Protein AMBP OS=Homo sapiens GN=AMBP PE=1 SV=1	0	99	CVLFPYGGCQGNGNK	Carbamidomethyl(C)@1; Carbamidomethyl(C)@9		0.00539603	1669.74	557.587	1669.73	557.585	3	22
1	167.84	57.1	P02760	AMBP_HUMAN	Protein AMBP OS=Homo sapiens GN=AMBP PE=1 SV=1	0	99	CVLFPYGGCQGNGNK	Carbamidomethyl(C)@1; Carbamidomethyl(C)@9		0.00539603	1669.74	557.587	1669.73	557.585	3	16
1	167.84	57.1	P02760	AMBP_HUMAN	Protein AMBP OS=Homo sapiens GN=AMBP PE=1 SV=1	0	99	CVLFPYGGCQGNGNK	Carbamidomethyl(C)@1; Carbamidomethyl(C)@9		0.0042974	1669.74	557.587	1669.73	557.585	3	17
1	167.84	57.1	P02760	AMBP_HUMAN	Protein AMBP OS=Homo sapiens GN=AMBP PE=1 SV=1	0	99	CVLFPYGGCQGNGNK	Carbamidomethyl(C)@1; Carbamidomethyl(C)@9; Deamidated(Q)@10		0.0015283	1670.72	836.367	1670.72	836.366	2	18
1	167.84	57.1	P02760	AMBP_HUMAN	Protein AMBP OS=Homo sapiens GN=AMBP PE=1 SV=1	0	99	CVLFPYGGCQGNGNK	Carbamidomethyl(C)@1; Carbamidomethyl(C)@9; Deamidated(N)@12		0.00593187	1670.72	557.915	1670.72	557.913	3	22
1	167.84	57.1	P02760	AMBP_HUMAN	Protein AMBP OS=Homo sapiens GN=AMBP PE=1 SV=1	0	99	CVLFPYGGCQGNGNK	Carbamidomethyl(C)@1; Carbamidomethyl(C)@9; Deamidated(N)@12		0.0015283	1670.72	836.367	1670.72	836.366	2	20
1	167.84	57.1	P02760	AMBP_HUMAN	Protein AMBP OS=Homo sapiens GN=AMBP PE=1 SV=1	0	99	CVLFPYGGCQGNGNK	Carbamidomethyl(C)@1; Carbamidomethyl(C)@9; Deamidated(N)@12		0.00245289	1670.72	557.914	1670.72	557.913	3	16
1	167.84	57.1	P02760	AMBP_HUMAN	Protein AMBP OS=Homo sapiens GN=AMBP PE=1 SV=1	0	99	CVLFPYGGCQGNGNK	Carbamidomethyl(C)@1; Carbamidomethyl(C)@9; Deamidated(N)@12		0.00189451	1670.72	836.367	1670.72	836.366	2	17
1	167.84	57.1	P02760	AMBP_HUMAN	Protein AMBP OS=Homo sapiens GN=AMBP PE=1 SV=1	0	99	CVLFPYGGCQGNGNK	Carbamidomethyl(C)@1; Carbamidomethyl(C)@9; Deamidated(N)@12		0.00189451	1670.72	836.367	1670.72	836.366	2	22
1	167.84	57.1	P02760	AMBP_HUMAN	Protein AMBP OS=Homo sapiens GN=AMBP PE=1 SV=1	0	99	CVLFPYGGCQGNGNK	Carbamidomethyl(C)@1; Carbamidomethyl(C)@9; Deamidated(N)@12		0.00189451	1670.72	836.367	1670.72	836.366	2	18
1	167.84	57.1	P02760	AMBP_HUMAN	Protein AMBP OS=Homo sapiens GN=AMBP PE=1 SV=1	0	99	CVLFPYGGCQGNGNK	Carbamidomethyl(C)@1; Carbamidomethyl(C)@9; Deamidated(N)@12		0.00189451	1670.72	836.367	1670.72	836.366	2	21
1	167.84	57.1	P02760	AMBP_HUMAN	Protein AMBP OS=Homo sapiens GN=AMBP PE=1 SV=1	0	99	CVLFPYGGCQGNGNK	Carbamidomethyl(C)@1; Carbamidomethyl(C)@9; Deamidated(N)@12		0.00189451	1670.72	836.367	1670.72	836.366	2	18
1	167.84	57.1	P02760	AMBP_HUMAN	Protein AMBP OS=Homo sapiens GN=AMBP PE=1 SV=1	0	99	CVLFPYGGCQGNGNK	Carbamidomethyl(C)@1; Carbamidomethyl(C)@9; Deamidated(N)@12		0.000917956	1670.72	836.367	1670.72	836.366	2	17
1	167.84	57.1	P02760	AMBP_HUMAN	Protein AMBP OS=Homo sapiens GN=AMBP PE=1 SV=1	0	99	CVLFPYGGCQGNGNK	Carbamidomethyl(C)@1; Carbamidomethyl(C)@9; Deamidated(N)@12		0.000988057	1670.72	557.914	1670.72	557.913	3	17
1	167.84	57.1	P02760	AMBP_HUMAN	Protein AMBP OS=Homo sapiens GN=AMBP PE=1 SV=1	0	99	CVLFPYGGCQGNGNK	Carbamidomethyl(C)@1; Carbamidomethyl(C)@9; Deamidated(N)@12		0.00117116	1670.72	557.914	1670.72	557.913	3	17
1	167.84	57.1	P02760	AMBP_HUMAN	Protein AMBP OS=Homo sapiens GN=AMBP PE=1 SV=1	0	99	CVLFPYGGCQGNGNK	Carbamidomethyl(C)@1; Carbamidomethyl(C)@9		0.00650857	1669.74	557.587	1669.73	557.585	3	17
1	167.84	57.1	P02760	AMBP_HUMAN	Protein AMBP OS=Homo sapiens GN=AMBP PE=1 SV=1	0	99	CVLFPYGGCQGNGNK	Carbamidomethyl(C)@1; Carbamidomethyl(C)@9		0.00650857	1669.74	557.587	1669.73	557.585	3	21
1	167.84	57.1	P02760	AMBP_HUMAN	Protein AMBP OS=Homo sapiens GN=AMBP PE=1 SV=1	0	99	CVLFPYGGCQGNGNK	Carbamidomethyl(C)@1; Carbamidomethyl(C)@9		0.00650857	1669.74	557.587	1669.73	557.585	3	23
1	167.84	57.1	P02760	AMBP_HUMAN	Protein AMBP OS=Homo sapiens GN=AMBP PE=1 SV=1	0	99	CVLFPYGGCQGNGNK	Carbamidomethyl(C)@1; Pro->pyro-Glu(P)@5; Carbamidomethyl(C)@9		0.0398917	1683.75	562.258	1683.71	562.245	3	15
1	167.84	57.1	P02760	AMBP_HUMAN	Protein AMBP OS=Homo sapiens GN=AMBP PE=1 SV=1	0	99	CVLFPYGGCQGNGNK	Carbamidomethyl(C)@1; Carbamidomethyl(C)@9; Cation:Na@C-term		0.00245531	1691.72	564.913	1691.72	564.913	3	14
1	167.84	57.1	P02760	AMBP_HUMAN	Protein AMBP OS=Homo sapiens GN=AMBP PE=1 SV=1	0	99	CVLFPYGGCQGNGNK	Carbamidomethyl(C)@1; Pro->pyro-Glu(P)@5; Carbamidomethyl(C)@9		0.0398917	1683.75	562.258	1683.71	562.245	3	14
1	167.84	57.1	P02760	AMBP_HUMAN	Protein AMBP OS=Homo sapiens GN=AMBP PE=1 SV=1	0	99	CVLFPYGGCQGNGNK	Carbamidomethyl(C)@1; Carbamidomethyl(C)@9; Ammonia-loss(N)@14		-0.000314142	1652.71	827.361	1652.71	827.361	2	12
1	167.84	57.1	P02760	AMBP_HUMAN	Protein AMBP OS=Homo sapiens GN=AMBP PE=1 SV=1	0	99	CVLFPYGGCQGNGNK	Carbamidomethyl(C)@1; Pro->pyro-Glu(P)@5; Carbamidomethyl(C)@9		0.0398917	1683.75	562.258	1683.71	562.245	3	15
1	167.84	57.1	P02760	AMBP_HUMAN	Protein AMBP OS=Homo sapiens GN=AMBP PE=1 SV=1	0	99	CVLFPYGGCQGNGNK	Carbamidomethyl(C)@1; Carbamidomethyl(C)@9; Ammonia-loss(N)@14		-0.000314142	1652.71	827.361	1652.71	827.361	2	12
1	167.84	57.1	P02760	AMBP_HUMAN	Protein AMBP OS=Homo sapiens GN=AMBP PE=1 SV=1	0	99	CVLFPYGGCQGNGNK	Carbamidomethyl(C)@1; Carbamidomethyl(C)@9; Deamidated(N)@12		0.00430095	1670.72	836.369	1670.72	836.366	2	17
1	167.84	57.1	P02760	AMBP_HUMAN	Protein AMBP OS=Homo sapiens GN=AMBP PE=1 SV=1	0	99	CVLFPYGGCQGNGNK	Carbamidomethyl(C)@1; Carbamidomethyl(C)@9; Deamidated(N)@12		0.00430095	1670.72	836.369	1670.72	836.366	2	21
1	167.84	57.1	P02760	AMBP_HUMAN	Protein AMBP OS=Homo sapiens GN=AMBP PE=1 SV=1	0	99	CVLFPYGGCQGNGNK	Carbamidomethyl(C)@1; Carbamidomethyl(C)@9; Deamidated(N)@12		0.00430095	1670.72	836.369	1670.72	836.366	2	19
1	167.84	57.1	P02760	AMBP_HUMAN	Protein AMBP OS=Homo sapiens GN=AMBP PE=1 SV=1	0	99	CVLFPYGGCQGNGNK	Carbamidomethyl(C)@1; Carbamidomethyl(C)@9; Deamidated(Q)@10; Deamidated(N)@14		0.00758695	1671.71	558.244	1671.7	558.241	3	13
1	167.84	57.1	P02760	AMBP_HUMAN	Protein AMBP OS=Homo sapiens GN=AMBP PE=1 SV=1	0	99	CVLFPYGGCQGNGNK	Carbamidomethyl(C)@1; Carbamidomethyl(C)@9; Deamidated(Q)@10; Deamidated(N)@12		0.00404569	1671.71	836.86	1671.7	836.858	2	13
1	167.84	57.1	P02760	AMBP_HUMAN	Protein AMBP OS=Homo sapiens GN=AMBP PE=1 SV=1	0	99	CVLFPYGGCQGNGNK	Carbamidomethyl(C)@1; Carbamidomethyl(C)@9; Deamidated(N)@12		0.00411809	1670.72	557.915	1670.72	557.913	3	19
1	167.84	57.1	P02760	AMBP_HUMAN	Protein AMBP OS=Homo sapiens GN=AMBP PE=1 SV=1	0	99	CVLFPYGGCQGNGNK	Carbamidomethyl(C)@1; Pro->pyro-Glu(P)@5; Carbamidomethyl(C)@9; Deamidated(N)@12		0.0391348	1684.74	843.375	1684.7	843.356	2	12
1	167.84	57.1	P02760	AMBP_HUMAN	Protein AMBP OS=Homo sapiens GN=AMBP PE=1 SV=1	0	99	CVLFPYGGCQGNGNK	Carbamidomethyl(C)@1; Carbamidomethyl(C)@9; Deamidated(N)@12		0.00149334	1670.72	836.367	1670.72	836.366	2	23
1	167.84	57.1	P02760	AMBP_HUMAN	Protein AMBP OS=Homo sapiens GN=AMBP PE=1 SV=1	0	99	CVLFPYGGCQGNGNK	Carbamidomethyl(C)@1; Carbamidomethyl(C)@9; Deamidated(N)@12; Cation:Na@C-term		0.00390999	1692.7	565.242	1692.7	565.241	3	14
1	167.84	57.1	P02760	AMBP_HUMAN	Protein AMBP OS=Homo sapiens GN=AMBP PE=1 SV=1	0	99	CVLFPYGGCQGNGNK	Carbamidomethyl(C)@1; Amino(Y)@6; Carbamidomethyl(C)@9		-0.00737118	1684.74	562.587	1684.74	562.589	3	12
1	167.84	57.1	P02760	AMBP_HUMAN	Protein AMBP OS=Homo sapiens GN=AMBP PE=1 SV=1	0	99	CVLFPYGGCQGNGNK	Carbamidomethyl(C)@1; Carbamidomethyl(C)@9; Deamidated(N)@12		0.00149334	1670.72	836.367	1670.72	836.366	2	21
1	167.84	57.1	P02760	AMBP_HUMAN	Protein AMBP OS=Homo sapiens GN=AMBP PE=1 SV=1	0	99	CVLFPYGGCQGNGNK	Carbamidomethyl(C)@1; Carbamidomethyl(C)@9; Deamidated(N)@12; Cation:Na@C-term		0.00390999	1692.7	565.242	1692.7	565.241	3	16
1	167.84	57.1	P02760	AMBP_HUMAN	Protein AMBP OS=Homo sapiens GN=AMBP PE=1 SV=1	0	99	CVLFPYGGCQGNGNK	Carbamidomethyl(C)@1; Carbamidomethyl(C)@9; Deamidated(N)@12		0.00411809	1670.72	557.915	1670.72	557.913	3	18
1	167.84	57.1	P02760	AMBP_HUMAN	Protein AMBP OS=Homo sapiens GN=AMBP PE=1 SV=1	0	99	CVLFPYGGCQGNGNK	Carbamidomethyl(C)@1; Carbamidomethyl(C)@9; Deamidated(Q)@10; Deamidated(N)@12		0.00429106	1671.71	558.243	1671.7	558.241	3	19
1	167.84	57.1	P02760	AMBP_HUMAN	Protein AMBP OS=Homo sapiens GN=AMBP PE=1 SV=1	0	99	CVLFPYGGCQGNGNK	Carbamidomethyl(C)@1; Carbamidomethyl(C)@9; Deamidated(Q)@10; Deamidated(N)@12		0.00429106	1671.71	558.243	1671.7	558.241	3	19
1	167.84	57.1	P02760	AMBP_HUMAN	Protein AMBP OS=Homo sapiens GN=AMBP PE=1 SV=1	0	99	CVLFPYGGCQGNGNK	Carbamidomethyl(C)@1; Carbamidomethyl(C)@9		-9.03788	1660.7	831.355	1669.73	835.874	2	14
1	167.84	57.1	P02760	AMBP_HUMAN	Protein AMBP OS=Homo sapiens GN=AMBP PE=1 SV=1	0	99	CVLFPYGGCQGNGNK	Carbamidomethyl(C)@1; Carbamidomethyl(C)@9; Ammonia-loss(N)@12		0.00310381	1652.71	827.363	1652.71	827.361	2	14
1	167.84	57.1	P02760	AMBP_HUMAN	Protein AMBP OS=Homo sapiens GN=AMBP PE=1 SV=1	0	99	CVLFPYGGCQGNGNK	Carbamidomethyl(C)@1; Carbamidomethyl(C)@9; Deamidated(N)@12		0.00343371	1670.72	557.914	1670.72	557.913	3	20
1	167.84	57.1	P02760	AMBP_HUMAN	Protein AMBP OS=Homo sapiens GN=AMBP PE=1 SV=1	0	99	CVLFPYGGCQGNGNK	Carbamidomethyl(C)@1; Carbamidomethyl(C)@9; Deamidated(N)@12		0.00379992	1670.72	557.915	1670.72	557.913	3	21
1	167.84	57.1	P02760	AMBP_HUMAN	Protein AMBP OS=Homo sapiens GN=AMBP PE=1 SV=1	0	99	CVLFPYGGCQGNGNK	Carbamidomethyl(C)@1; Carbamidomethyl(C)@9; Ammonia-loss(N)@14		-0.000129048	1652.71	827.361	1652.71	827.361	2	13
1	167.84	57.1	P02760	AMBP_HUMAN	Protein AMBP OS=Homo sapiens GN=AMBP PE=1 SV=1	0	99	CVLFPYGGCQGNGNK	Carbamidomethyl(C)@1; Pro->pyro-Glu(P)@5; Carbamidomethyl(C)@9		0.0387764	1683.75	562.258	1683.71	562.245	3	15
1	167.84	57.1	P02760	AMBP_HUMAN	Protein AMBP OS=Homo sapiens GN=AMBP PE=1 SV=1	0	99	CVLFPYGGCQGNGNK	Carbamidomethyl(C)@1; Carbamidomethyl(C)@9; Ammonia-loss(N)@14		-0.00293666	1652.7	827.36	1652.71	827.361	2	12
1	167.84	57.1	P02760	AMBP_HUMAN	Protein AMBP OS=Homo sapiens GN=AMBP PE=1 SV=1	0	99	CVLFPYGGCQGNGNK	Carbamidomethyl(C)@1; Carbamidomethyl(C)@9; Deamidated(Q)@10; Deamidated(N)@12		0.00132732	1671.7	836.859	1671.7	836.858	2	15
1	167.84	57.1	P02760	AMBP_HUMAN	Protein AMBP OS=Homo sapiens GN=AMBP PE=1 SV=1	0	99	CVLFPYGGCQGNGNK	Carbamidomethyl(C)@1; Carbamidomethyl(C)@9; Deamidated(Q)@10; Deamidated(N)@12		0.00865467	1671.71	558.244	1671.7	558.241	3	17
1	167.84	57.1	P02760	AMBP_HUMAN	Protein AMBP OS=Homo sapiens GN=AMBP PE=1 SV=1	0	99	CVLFPYGGCQGNGNK	Carbamidomethyl(C)@1; Carbamidomethyl(C)@9		0.00445093	1669.74	557.587	1669.73	557.585	3	19
1	167.84	57.1	P02760	AMBP_HUMAN	Protein AMBP OS=Homo sapiens GN=AMBP PE=1 SV=1	0	99	CVLFPYGGCQGNGNK	Carbamidomethyl(C)@1; Carbamidomethyl(C)@9		0.00445093	1669.74	557.587	1669.73	557.585	3	22
1	167.84	57.1	P02760	AMBP_HUMAN	Protein AMBP OS=Homo sapiens GN=AMBP PE=1 SV=1	0	99	CVLFPYGGCQGNGNK	Carbamidomethyl(C)@1; Carbamidomethyl(C)@9		0.00445093	1669.74	557.587	1669.73	557.585	3	22
1	167.84	57.1	P02760	AMBP_HUMAN	Protein AMBP OS=Homo sapiens GN=AMBP PE=1 SV=1	0	99	CVLFPYGGCQGNGNK	Carbamidomethyl(C)@1; Carbamidomethyl(C)@9		0.00426783	1669.74	557.587	1669.73	557.585	3	18
1	167.84	57.1	P02760	AMBP_HUMAN	Protein AMBP OS=Homo sapiens GN=AMBP PE=1 SV=1	0	99	CVLFPYGGCQGNGNK	Carbamidomethyl(C)@1; Carbamidomethyl(C)@9; Deamidated(N)@12		0.00187454	1670.72	557.914	1670.72	557.913	3	23
1	167.84	57.1	P02760	AMBP_HUMAN	Protein AMBP OS=Homo sapiens GN=AMBP PE=1 SV=1	0	99	CVLFPYGGCQGNGNK	Carbamidomethyl(C)@1; Carbamidomethyl(C)@9; Deamidated(N)@12		0.00147824	1670.72	836.367	1670.72	836.366	2	21
1	167.84	57.1	P02760	AMBP_HUMAN	Protein AMBP OS=Homo sapiens GN=AMBP PE=1 SV=1	0	99	CVLFPYGGCQGNGNK	Carbamidomethyl(C)@1; Carbamidomethyl(C)@9; Deamidated(N)@12		0.00242385	1670.72	557.914	1670.72	557.913	3	22
1	167.84	57.1	P02760	AMBP_HUMAN	Protein AMBP OS=Homo sapiens GN=AMBP PE=1 SV=1	0	99	CVLFPYGGCQGNGNK	Carbamidomethyl(C)@1; Carbamidomethyl(C)@9; Deamidated(N)@12		0.00242385	1670.72	557.914	1670.72	557.913	3	21
1	167.84	57.1	P02760	AMBP_HUMAN	Protein AMBP OS=Homo sapiens GN=AMBP PE=1 SV=1	0	99	CVLFPYGGCQGNGNK	Carbamidomethyl(C)@1; Carbamidomethyl(C)@9; Deamidated(N)@12		0.00114212	1670.72	557.914	1670.72	557.913	3	19
1	167.84	57.1	P02760	AMBP_HUMAN	Protein AMBP OS=Homo sapiens GN=AMBP PE=1 SV=1	0	99	CVLFPYGGCQGNGNK	Carbamidomethyl(C)@1; Carbamidomethyl(C)@9; Deamidated(N)@12		0.00480421	1670.72	557.915	1670.72	557.913	3	17
1	167.84	57.1	P02760	AMBP_HUMAN	Protein AMBP OS=Homo sapiens GN=AMBP PE=1 SV=1	0	99	CVLFPYGGCQGNGNK	Carbamidomethyl(C)@1; Carbamidomethyl(C)@9		0.00727143	1669.74	557.588	1669.73	557.585	3	23
1	167.84	57.1	P02760	AMBP_HUMAN	Protein AMBP OS=Homo sapiens GN=AMBP PE=1 SV=1	0	99	CVLFPYGGCQGNGNK	Carbamidomethyl(C)@1; Pro->pyro-Glu(P)@5; Carbamidomethyl(C)@9		0.0391042	1683.75	562.258	1683.71	562.245	3	15
1	167.84	57.1	P02760	AMBP_HUMAN	Protein AMBP OS=Homo sapiens GN=AMBP PE=1 SV=1	0	99	CVLFPYGGCQGNGNK	Carbamidomethyl(C)@1; Carbamidomethyl(C)@9; Ammonia-loss(N)@14		0.0014072	1652.71	827.362	1652.71	827.361	2	13
1	167.84	57.1	P02760	AMBP_HUMAN	Protein AMBP OS=Homo sapiens GN=AMBP PE=1 SV=1	0	99	CVLFPYGGCQGNGNK	Carbamidomethyl(C)@1; Carbamidomethyl(C)@9; Deamidated(N)@12		0.00487497	1670.72	557.915	1670.72	557.913	3	20
1	167.84	57.1	P02760	AMBP_HUMAN	Protein AMBP OS=Homo sapiens GN=AMBP PE=1 SV=1	0	99	CVLFPYGGCQGNGNK	Carbamidomethyl(C)@1; Carbamidomethyl(C)@9; Deamidated(N)@12		0.00487497	1670.72	557.915	1670.72	557.913	3	22
1	167.84	57.1	P02760	AMBP_HUMAN	Protein AMBP OS=Homo sapiens GN=AMBP PE=1 SV=1	0	99	CVLFPYGGCQGNGNK	Carbamidomethyl(C)@1; Carbamidomethyl(C)@9; Deamidated(N)@12		0.00487497	1670.72	557.915	1670.72	557.913	3	20
1	167.84	57.1	P02760	AMBP_HUMAN	Protein AMBP OS=Homo sapiens GN=AMBP PE=1 SV=1	0	99	CVLFPYGGCQGNGNK	Carbamidomethyl(C)@1; Carbamidomethyl(C)@9; Deamidated(N)@12		0.00560738	1670.72	557.915	1670.72	557.913	3	21
1	167.84	57.1	P02760	AMBP_HUMAN	Protein AMBP OS=Homo sapiens GN=AMBP PE=1 SV=1	0	99	CVLFPYGGCQGNGNK	Carbamidomethyl(C)@1; Carbamidomethyl(C)@9; Deamidated(N)@12		0.00524118	1670.72	557.915	1670.72	557.913	3	22
1	167.84	57.1	P02760	AMBP_HUMAN	Protein AMBP OS=Homo sapiens GN=AMBP PE=1 SV=1	0	99	CVLFPYGGCQGNGNK	Carbamidomethyl(C)@1; Pro->pyro-Glu(P)@5; Carbamidomethyl(C)@9; Deamidated(N)@12		0.033778	1684.73	562.584	1684.7	562.573	3	16
1	167.84	57.1	P02760	AMBP_HUMAN	Protein AMBP OS=Homo sapiens GN=AMBP PE=1 SV=1	0	99	CVLFPYGGCQGNGNK	Carbamidomethyl(C)@1; Carbamidomethyl(C)@9; Deamidated(N)@12		0.00524118	1670.72	557.915	1670.72	557.913	3	22
1	167.84	57.1	P02760	AMBP_HUMAN	Protein AMBP OS=Homo sapiens GN=AMBP PE=1 SV=1	0	99	CVLFPYGGCQGNGNK	Carbamidomethyl(C)@1; Pro->pyro-Glu(P)@5; Carbamidomethyl(C)@9; Deamidated(N)@12		0.033778	1684.73	562.584	1684.7	562.573	3	16
1	167.84	57.1	P02760	AMBP_HUMAN	Protein AMBP OS=Homo sapiens GN=AMBP PE=1 SV=1	0	99	CVLFPYGGCQGNGNK	Carbamidomethyl(C)@1; Carbamidomethyl(C)@9; Deamidated(N)@12		0.00487497	1670.72	557.915	1670.72	557.913	3	20
1	167.84	57.1	P02760	AMBP_HUMAN	Protein AMBP OS=Homo sapiens GN=AMBP PE=1 SV=1	0	99	CVLFPYGGCQGNGNK	Carbamidomethyl(C)@1; Carbamidomethyl(C)@9; Cation:Na@C-term		0.00288185	1691.72	564.914	1691.72	564.913	3	14
1	167.84	57.1	P02760	AMBP_HUMAN	Protein AMBP OS=Homo sapiens GN=AMBP PE=1 SV=1	0	99	CVLFPYGGCQGNGNK	Carbamidomethyl(C)@1; Carbamidomethyl(C)@9		0.00323863	1669.74	557.586	1669.73	557.585	3	22
1	167.84	57.1	P02760	AMBP_HUMAN	Protein AMBP OS=Homo sapiens GN=AMBP PE=1 SV=1	0	99	CVLFPYGGCQGNGNK	Carbamidomethyl(C)@1; Carbamidomethyl(C)@9; Cation:Na@C-term		0.00288185	1691.72	564.914	1691.72	564.913	3	14
1	167.84	57.1	P02760	AMBP_HUMAN	Protein AMBP OS=Homo sapiens GN=AMBP PE=1 SV=1	0	99	CVLFPYGGCQGNGNK	Carbamidomethyl(C)@1; Carbamidomethyl(C)@9; Deamidated(N)@12		0.00340497	1670.72	557.914	1670.72	557.913	3	20
1	167.84	57.1	P02760	AMBP_HUMAN	Protein AMBP OS=Homo sapiens GN=AMBP PE=1 SV=1	0	99	CVLFPYGGCQGNGNK	Carbamidomethyl(C)@1; Carbamidomethyl(C)@9; Deamidated(N)@12		0.00743325	1670.73	557.916	1670.72	557.913	3	23
1	167.84	57.1	P02760	AMBP_HUMAN	Protein AMBP OS=Homo sapiens GN=AMBP PE=1 SV=1	0	99	CVLFPYGGCQGNGNK	Carbamidomethyl(C)@1; Carbamidomethyl(C)@9; Deamidated(N)@12; Cation:Na@C-term		0.00378053	1692.7	565.242	1692.7	565.241	3	13
1	167.84	57.1	P02760	AMBP_HUMAN	Protein AMBP OS=Homo sapiens GN=AMBP PE=1 SV=1	0	99	CVLFPYGGCQGNGNK	Carbamidomethyl(C)@1; Carbamidomethyl(C)@9; Deamidated(N)@12		0.00743325	1670.73	557.916	1670.72	557.913	3	22
1	167.84	57.1	P02760	AMBP_HUMAN	Protein AMBP OS=Homo sapiens GN=AMBP PE=1 SV=1	0	99	CVLFPYGGCQGNGNK	Carbamidomethyl(C)@1; Carbamidomethyl(C)@9; Ammonia-loss(N)@12		0.000228927	1652.71	827.361	1652.71	827.361	2	13
1	167.84	57.1	P02760	AMBP_HUMAN	Protein AMBP OS=Homo sapiens GN=AMBP PE=1 SV=1	0	99	CVLFPYGGCQGNGNK	Carbamidomethyl(C)@1; Carbamidomethyl(C)@9; Ammonia-loss(N)@12		0.000473065	1652.71	827.361	1652.71	827.361	2	14
1	167.84	57.1	P02760	AMBP_HUMAN	Protein AMBP OS=Homo sapiens GN=AMBP PE=1 SV=1	0	99	CVLFPYGGCQGNGNK	Carbamidomethyl(C)@1; Carbamidomethyl(C)@9; Ammonia-loss(N)@14		0.000473065	1652.71	827.361	1652.71	827.361	2	10
1	167.84	57.1	P02760	AMBP_HUMAN	Protein AMBP OS=Homo sapiens GN=AMBP PE=1 SV=1	0	99	CVLFPYGGCQGNGNK	Carbamidomethyl(C)@1; Carbamidomethyl(C)@9		0.00586568	1669.74	557.587	1669.73	557.585	3	19
1	167.84	57.1	P02760	AMBP_HUMAN	Protein AMBP OS=Homo sapiens GN=AMBP PE=1 SV=1	0	99	CVLFPYGGCQGNGNK	Carbamidomethyl(C)@1; Carbamidomethyl(C)@9		0.00586568	1669.74	557.587	1669.73	557.585	3	22
1	167.84	57.1	P02760	AMBP_HUMAN	Protein AMBP OS=Homo sapiens GN=AMBP PE=1 SV=1	0	99	CVLFPYGGCQGNGNK	Carbamidomethyl(C)@1; Carbamidomethyl(C)@9; Deamidated(N)@12		0.00310794	1670.72	557.914	1670.72	557.913	3	19
1	167.84	57.1	P02760	AMBP_HUMAN	Protein AMBP OS=Homo sapiens GN=AMBP PE=1 SV=1	0	99	CVLFPYGGCQGNGNK	Carbamidomethyl(C)@1; Carbamidomethyl(C)@9; Deamidated(N)@12		0.000676723	1670.72	836.367	1670.72	836.366	2	21
1	167.84	57.1	P02760	AMBP_HUMAN	Protein AMBP OS=Homo sapiens GN=AMBP PE=1 SV=1	0	99	CVLFPYGGCQGNGNK	Carbamidomethyl(C)@1; Carbamidomethyl(C)@9; Deamidated(N)@12		0.00677003	1670.72	557.916	1670.72	557.913	3	22
1	167.84	57.1	P02760	AMBP_HUMAN	Protein AMBP OS=Homo sapiens GN=AMBP PE=1 SV=1	0	99	CVLFPYGGCQGNGNK	Carbamidomethyl(C)@1; Pro->pyro-Glu(P)@5; Carbamidomethyl(C)@9; Deamidated(N)@12		0.039772	1684.74	562.586	1684.7	562.573	3	17
1	167.84	57.1	P02760	AMBP_HUMAN	Protein AMBP OS=Homo sapiens GN=AMBP PE=1 SV=1	0	99	CVLFPYGGCQGNGNK	Carbamidomethyl(C)@1; Carbamidomethyl(C)@9; Deamidated(N)@12		0.00348433	1670.72	836.368	1670.72	836.366	2	20
1	167.84	57.1	P02760	AMBP_HUMAN	Protein AMBP OS=Homo sapiens GN=AMBP PE=1 SV=1	0	99	CVLFPYGGCQGNGNK	Carbamidomethyl(C)@1; Carbamidomethyl(C)@9; Deamidated(N)@12		0.00348433	1670.72	836.368	1670.72	836.366	2	21
1	167.84	57.1	P02760	AMBP_HUMAN	Protein AMBP OS=Homo sapiens GN=AMBP PE=1 SV=1	0	99	CVLFPYGGCQGNGNK	Carbamidomethyl(C)@1; Carbamidomethyl(C)@9; Deamidated(Q)@10; Deamidated(N)@12		0.00858991	1671.71	558.244	1671.7	558.241	3	16
1	167.84	57.1	P02760	AMBP_HUMAN	Protein AMBP OS=Homo sapiens GN=AMBP PE=1 SV=1	0	99	CVLFPYGGCQGNGNK	Carbamidomethyl(C)@1; Carbamidomethyl(C)@9		0.0048853	1669.74	557.587	1669.73	557.585	3	19
1	167.84	57.1	P02760	AMBP_HUMAN	Protein AMBP OS=Homo sapiens GN=AMBP PE=1 SV=1	0	99	CVLFPYGGCQGNGNK	Carbamidomethyl(C)@1; Carbamidomethyl(C)@9		0.0048853	1669.74	557.587	1669.73	557.585	3	21
1	167.84	57.1	P02760	AMBP_HUMAN	Protein AMBP OS=Homo sapiens GN=AMBP PE=1 SV=1	0	99	CVLFPYGGCQGNGNK	Carbamidomethyl(C)@1; Carbamidomethyl(C)@9; Cation:Na@C-term		0.00421945	1691.72	564.914	1691.72	564.913	3	14
1	167.84	57.1	P02760	AMBP_HUMAN	Protein AMBP OS=Homo sapiens GN=AMBP PE=1 SV=1	0	99	CVLFPYGGCQGNGNK	Carbamidomethyl(C)@1; Pro->pyro-Glu(P)@5; Carbamidomethyl(C)@9		0.039009	1683.75	562.258	1683.71	562.245	3	14
1	167.84	57.1	P02760	AMBP_HUMAN	Protein AMBP OS=Homo sapiens GN=AMBP PE=1 SV=1	0	99	CVLFPYGGCQGNGNK	Carbamidomethyl(C)@1; Carbamidomethyl(C)@9		0.0048853	1669.74	557.587	1669.73	557.585	3	20
1	167.84	57.1	P02760	AMBP_HUMAN	Protein AMBP OS=Homo sapiens GN=AMBP PE=1 SV=1	0	99	CVLFPYGGCQGNGNK	Carbamidomethyl(C)@1; Carbamidomethyl(C)@9; Ammonia-loss(N)@14		-0.00433382	1652.7	827.359	1652.71	827.361	2	14
1	167.84	57.1	P02760	AMBP_HUMAN	Protein AMBP OS=Homo sapiens GN=AMBP PE=1 SV=1	0	99	CVLFPYGGCQGNGNK	Carbamidomethyl(C)@1; Carbamidomethyl(C)@9; Ammonia-loss(N)@14		-0.00433382	1652.7	827.359	1652.71	827.361	2	13
1	167.84	57.1	P02760	AMBP_HUMAN	Protein AMBP OS=Homo sapiens GN=AMBP PE=1 SV=1	0	99	CVLFPYGGCQGNGNK	Carbamidomethyl(C)@1; Carbamidomethyl(C)@9; Deamidated(N)@12		-0.00303242	1670.72	836.365	1670.72	836.366	2	15
1	167.84	57.1	P02760	AMBP_HUMAN	Protein AMBP OS=Homo sapiens GN=AMBP PE=1 SV=1	0	99	CVLFPYGGCQGNGNK	Carbamidomethyl(C)@1; Carbamidomethyl(C)@9; Deamidated(N)@12		0.00193327	1670.72	557.914	1670.72	557.913	3	22
1	167.84	57.1	P02760	AMBP_HUMAN	Protein AMBP OS=Homo sapiens GN=AMBP PE=1 SV=1	0	99	CVLFPYGGCQGNGNK	Carbamidomethyl(C)@1; Pro->pyro-Glu(P)@5; Carbamidomethyl(C)@9; Deamidated(N)@12		0.0384372	1684.74	562.586	1684.7	562.573	3	14
1	167.84	57.1	P02760	AMBP_HUMAN	Protein AMBP OS=Homo sapiens GN=AMBP PE=1 SV=1	0	99	CVLFPYGGCQGNGNK	Carbamidomethyl(C)@1; Carbamidomethyl(C)@9; Deamidated(N)@12		-0.00303242	1670.72	836.365	1670.72	836.366	2	20
1	167.84	57.1	P02760	AMBP_HUMAN	Protein AMBP OS=Homo sapiens GN=AMBP PE=1 SV=1	0	99	CVLFPYGGCQGNGNK	Carbamidomethyl(C)@1; Pro->pyro-Glu(P)@5; Carbamidomethyl(C)@9; Deamidated(N)@12		0.0384372	1684.74	562.586	1684.7	562.573	3	13
1	167.84	57.1	P02760	AMBP_HUMAN	Protein AMBP OS=Homo sapiens GN=AMBP PE=1 SV=1	0	99	CVLFPYGGCQGNGNK	Carbamidomethyl(C)@1; Carbamidomethyl(C)@9; Deamidated(N)@14		-0.00315449	1670.71	836.365	1670.72	836.366	2	16
1	167.84	57.1	P02760	AMBP_HUMAN	Protein AMBP OS=Homo sapiens GN=AMBP PE=1 SV=1	0	99	CVLFPYGGCQGNGNK	Carbamidomethyl(C)@1; Carbamidomethyl(C)@9; Deamidated(N)@12		0.00248258	1670.72	557.914	1670.72	557.913	3	18
1	167.84	57.1	P02760	AMBP_HUMAN	Protein AMBP OS=Homo sapiens GN=AMBP PE=1 SV=1	0	99	CVLFPYGGCQGNGNK	Carbamidomethyl(C)@1; Carbamidomethyl(C)@9; Deamidated(N)@12; Cation:Na@C-term		0.00236593	1692.7	565.241	1692.7	565.241	3	14
1	167.84	57.1	P02760	AMBP_HUMAN	Protein AMBP OS=Homo sapiens GN=AMBP PE=1 SV=1	0	99	CVLFPYGGCQGNGNK	Carbamidomethyl(C)@1; Carbamidomethyl(C)@9; Deamidated(N)@12		0.00577843	1670.72	557.915	1670.72	557.913	3	22
1	167.84	57.1	P02760	AMBP_HUMAN	Protein AMBP OS=Homo sapiens GN=AMBP PE=1 SV=1	0	99	CVLFPYGGCQGNGNK	Carbamidomethyl(C)@1; Carbamidomethyl(C)@9; Deamidated(N)@12		0.00577843	1670.72	557.915	1670.72	557.913	3	23
1	167.84	57.1	P02760	AMBP_HUMAN	Protein AMBP OS=Homo sapiens GN=AMBP PE=1 SV=1	0	99	CVLFPYGGCQGNGNK	Carbamidomethyl(C)@1; Pro->pyro-Glu(P)@5; Carbamidomethyl(C)@9; Deamidated(N)@12		0.038071	1684.74	562.586	1684.7	562.573	3	13
1	167.84	57.1	P02760	AMBP_HUMAN	Protein AMBP OS=Homo sapiens GN=AMBP PE=1 SV=1	0	99	CVLFPYGGCQGNGNK	Carbamidomethyl(C)@1; Carbamidomethyl(C)@9; Deamidated(N)@12		0.00577843	1670.72	557.915	1670.72	557.913	3	22
1	167.84	57.1	P02760	AMBP_HUMAN	Protein AMBP OS=Homo sapiens GN=AMBP PE=1 SV=1	0	99	CVLFPYGGCQGNGNK	Carbamidomethyl(C)@1; Pro->pyro-Glu(P)@5; Carbamidomethyl(C)@9; Deamidated(N)@12		0.038071	1684.74	562.586	1684.7	562.573	3	14
1	167.84	57.1	P02760	AMBP_HUMAN	Protein AMBP OS=Homo sapiens GN=AMBP PE=1 SV=1	0	99	CVLFPYGGCQGNGNK	Carbamidomethyl(C)@1; Carbamidomethyl(C)@9; Deamidated(N)@12		0.00211637	1670.72	557.914	1670.72	557.913	3	20
1	167.84	57.1	P02760	AMBP_HUMAN	Protein AMBP OS=Homo sapiens GN=AMBP PE=1 SV=1	0	99	CVLFPYGGCQGNGNK	Carbamidomethyl(C)@1; Carbamidomethyl(C)@9; Deamidated(N)@12		0.00156707	1670.72	557.914	1670.72	557.913	3	17
1	167.84	57.1	P02760	AMBP_HUMAN	Protein AMBP OS=Homo sapiens GN=AMBP PE=1 SV=1	0	99	CVLFPYGGCQGNGNK	Carbamidomethyl(C)@1; Carbamidomethyl(C)@9; Deamidated(N)@12		0.000385479	1670.72	836.366	1670.72	836.366	2	16
1	167.84	57.1	P02760	AMBP_HUMAN	Protein AMBP OS=Homo sapiens GN=AMBP PE=1 SV=1	0	99	CVLFPYGGCQGNGNK	Carbamidomethyl(C)@1; Carbamidomethyl(C)@9; Ammonia-loss(N)@12		-0.000671784	1652.71	827.361	1652.71	827.361	2	14
1	167.84	57.1	P02760	AMBP_HUMAN	Protein AMBP OS=Homo sapiens GN=AMBP PE=1 SV=1	0	99	CVLFPYGGCQGNGNK	Carbamidomethyl(C)@1; Carbamidomethyl(C)@9; Ammonia-loss(N)@12		-0.00091592	1652.71	827.361	1652.71	827.361	2	12
1	167.84	57.1	P02760	AMBP_HUMAN	Protein AMBP OS=Homo sapiens GN=AMBP PE=1 SV=1	0	99	CVLFPYGGCQGNGNK	Carbamidomethyl(C)@1; Carbamidomethyl(C)@9		-0.000281449	1669.73	835.874	1669.73	835.874	2	17
1	167.84	57.1	P02760	AMBP_HUMAN	Protein AMBP OS=Homo sapiens GN=AMBP PE=1 SV=1	0	99	CVLFPYGGCQGNGNK	Carbamidomethyl(C)@1; Carbamidomethyl(C)@9		0.00224884	1669.74	557.586	1669.73	557.585	3	22
1	167.84	57.1	P02760	AMBP_HUMAN	Protein AMBP OS=Homo sapiens GN=AMBP PE=1 SV=1	0	99	CVLFPYGGCQGNGNK	Carbamidomethyl(C)@1; Pro->pyro-Glu(P)@5; Carbamidomethyl(C)@9		0.0350679	1683.75	562.257	1683.71	562.245	3	14
1	167.84	57.1	P02760	AMBP_HUMAN	Protein AMBP OS=Homo sapiens GN=AMBP PE=1 SV=1	0	99	CVLFPYGGCQGNGNK	Carbamidomethyl(C)@1; Carbamidomethyl(C)@9		8.47597e-05	1669.73	835.874	1669.73	835.874	2	17
1	167.84	57.1	P02760	AMBP_HUMAN	Protein AMBP OS=Homo sapiens GN=AMBP PE=1 SV=1	0	99	CVLFPYGGCQGNGNK	Carbamidomethyl(C)@1; Pro->pyro-Glu(P)@5; Carbamidomethyl(C)@9		0.0350679	1683.75	562.257	1683.71	562.245	3	14
1	167.84	57.1	P02760	AMBP_HUMAN	Protein AMBP OS=Homo sapiens GN=AMBP PE=1 SV=1	0	99	CVLFPYGGCQGNGNK	Carbamidomethyl(C)@1; Carbamidomethyl(C)@9; Ammonia-loss(N)@12		0.000613715	1652.71	551.91	1652.71	551.91	3	17
1	167.84	57.1	P02760	AMBP_HUMAN	Protein AMBP OS=Homo sapiens GN=AMBP PE=1 SV=1	0	99	CVLFPYGGCQGNGNK	Carbamidomethyl(C)@1; Carbamidomethyl(C)@9; Deamidated(N)@12		0.00589979	1670.72	557.915	1670.72	557.913	3	20
1	167.84	57.1	P02760	AMBP_HUMAN	Protein AMBP OS=Homo sapiens GN=AMBP PE=1 SV=1	0	99	CVLFPYGGCQGNGNK	Carbamidomethyl(C)@1; Carbamidomethyl(C)@9; Deamidated(N)@12		0.00251337	1670.72	836.368	1670.72	836.366	2	17
1	167.84	57.1	P02760	AMBP_HUMAN	Protein AMBP OS=Homo sapiens GN=AMBP PE=1 SV=1	0	99	CVLFPYGGCQGNGNK	Carbamidomethyl(C)@1; Carbamidomethyl(C)@9; Deamidated(N)@12		-0.00288924	1670.72	557.912	1670.72	557.913	3	19
1	167.84	57.1	P02760	AMBP_HUMAN	Protein AMBP OS=Homo sapiens GN=AMBP PE=1 SV=1	0	99	CVLFPYGGCQGNGNK	Carbamidomethyl(C)@1; Pro->pyro-Glu(P)@5; Carbamidomethyl(C)@9; Deamidated(N)@12		0.0356061	1684.73	562.585	1684.7	562.573	3	16
1	167.84	57.1	P02760	AMBP_HUMAN	Protein AMBP OS=Homo sapiens GN=AMBP PE=1 SV=1	0	99	CVLFPYGGCQGNGNK	Carbamidomethyl(C)@1; Carbamidomethyl(C)@9; Deamidated(N)@12		0.00263544	1670.72	836.368	1670.72	836.366	2	16
1	167.84	57.1	P02760	AMBP_HUMAN	Protein AMBP OS=Homo sapiens GN=AMBP PE=1 SV=1	0	99	CVLFPYGGCQGNGNK	Carbamidomethyl(C)@1; Carbamidomethyl(C)@9; Deamidated(N)@12		0.00263544	1670.72	836.368	1670.72	836.366	2	20
1	167.84	57.1	P02760	AMBP_HUMAN	Protein AMBP OS=Homo sapiens GN=AMBP PE=1 SV=1	0	99	CVLFPYGGCQGNGNK	Carbamidomethyl(C)@1; Carbamidomethyl(C)@9; Deamidated(N)@12		0.00608289	1670.72	557.915	1670.72	557.913	3	23
1	167.84	57.1	P02760	AMBP_HUMAN	Protein AMBP OS=Homo sapiens GN=AMBP PE=1 SV=1	0	99	CVLFPYGGCQGNGNK	Carbamidomethyl(C)@1; Carbamidomethyl(C)@9; Deamidated(N)@12		0.00263544	1670.72	836.368	1670.72	836.366	2	19
1	167.84	57.1	P02760	AMBP_HUMAN	Protein AMBP OS=Homo sapiens GN=AMBP PE=1 SV=1	0	99	CVLFPYGGCQGNGNK	Carbamidomethyl(C)@1; Carbamidomethyl(C)@9; Deamidated(N)@12		-0.00114871	1670.72	836.366	1670.72	836.366	2	15
1	167.84	57.1	P02760	AMBP_HUMAN	Protein AMBP OS=Homo sapiens GN=AMBP PE=1 SV=1	0	99	CVLFPYGGCQGNGNK	Carbamidomethyl(C)@1; Carbamidomethyl(C)@9; Ammonia-loss(N)@12		0.00159064	1652.71	827.362	1652.71	827.361	2	13
1	167.84	57.1	P02760	AMBP_HUMAN	Protein AMBP OS=Homo sapiens GN=AMBP PE=1 SV=1	0	99	CVLFPYGGCQGNGNK	Carbamidomethyl(C)@1; Carbamidomethyl(C)@9; Ammonia-loss(N)@12		0.00195685	1652.71	827.362	1652.71	827.361	2	12
1	167.84	57.1	P02760	AMBP_HUMAN	Protein AMBP OS=Homo sapiens GN=AMBP PE=1 SV=1	0	99	CVLFPYGGCQGNGNK	Carbamidomethyl(C)@1; Carbamidomethyl(C)@9; Deamidated(N)@12		0.00261464	1670.72	557.914	1670.72	557.913	3	18
1	167.84	57.1	P02760	AMBP_HUMAN	Protein AMBP OS=Homo sapiens GN=AMBP PE=1 SV=1	0	99	CVLFPYGGCQGNGNK	Carbamidomethyl(C)@1; Carbamidomethyl(C)@9; Deamidated(N)@12		0.00591054	1670.72	557.915	1670.72	557.913	3	17
1	167.84	57.1	P02760	AMBP_HUMAN	Protein AMBP OS=Homo sapiens GN=AMBP PE=1 SV=1	0	99	CVLFPYGGCQGNGNK	Carbamidomethyl(C)@1; Carbamidomethyl(C)@9; Deamidated(N)@12		0.00241284	1670.72	557.914	1670.72	557.913	3	18
1	167.84	57.1	P02760	AMBP_HUMAN	Protein AMBP OS=Homo sapiens GN=AMBP PE=1 SV=1	0	99	CVLFPYGGCQGNGNK	Carbamidomethyl(C)@1; Carbamidomethyl(C)@9		0.0045862	1669.74	557.587	1669.73	557.585	3	21
1	167.84	57.1	P02760	AMBP_HUMAN	Protein AMBP OS=Homo sapiens GN=AMBP PE=1 SV=1	0	99	CVLFPYGGCQGNGNK	Carbamidomethyl(C)@1; Carbamidomethyl(C)@9		0.0045862	1669.74	557.587	1669.73	557.585	3	21
1	167.84	57.1	P02760	AMBP_HUMAN	Protein AMBP OS=Homo sapiens GN=AMBP PE=1 SV=1	0	99	CVLFPYGGCQGNGNK	Carbamidomethyl(C)@1; Carbamidomethyl(C)@9		0.0045862	1669.74	557.587	1669.73	557.585	3	21
1	167.84	57.1	P02760	AMBP_HUMAN	Protein AMBP OS=Homo sapiens GN=AMBP PE=1 SV=1	0	99	CVLFPYGGCQGNGNK	Carbamidomethyl(C)@1; Carbamidomethyl(C)@9; Deamidated(N)@12		0.00145236	1670.72	557.914	1670.72	557.913	3	19
1	167.84	57.1	P02760	AMBP_HUMAN	Protein AMBP OS=Homo sapiens GN=AMBP PE=1 SV=1	0	99	CVLFPYGGCQGNGNK	Carbamidomethyl(C)@1; Carbamidomethyl(C)@9; Deamidated(N)@12		0.00122965	1670.72	836.367	1670.72	836.366	2	18
1	167.84	57.1	P02760	AMBP_HUMAN	Protein AMBP OS=Homo sapiens GN=AMBP PE=1 SV=1	0	99	CVLFPYGGCQGNGNK	Carbamidomethyl(C)@1; Carbamidomethyl(C)@9; Deamidated(N)@12		0.00218477	1670.72	557.914	1670.72	557.913	3	17
1	167.84	57.1	P02760	AMBP_HUMAN	Protein AMBP OS=Homo sapiens GN=AMBP PE=1 SV=1	0	99	CVLFPYGGCQGNGNK	Carbamidomethyl(C)@1; Carbamidomethyl(C)@9; Deamidated(N)@12		0.00291718	1670.72	557.914	1670.72	557.913	3	20
1	167.84	57.1	P02760	AMBP_HUMAN	Protein AMBP OS=Homo sapiens GN=AMBP PE=1 SV=1	0	99	CVLFPYGGCQGNGNK	Carbamidomethyl(C)@1; Carbamidomethyl(C)@9; Deamidated(N)@12		0.00273408	1670.72	557.914	1670.72	557.913	3	22
1	167.84	57.1	P02760	AMBP_HUMAN	Protein AMBP OS=Homo sapiens GN=AMBP PE=1 SV=1	0	99	CVLFPYGGCQGNGNK	Carbamidomethyl(C)@1; Carbamidomethyl(C)@9; Deamidated(N)@12		0.00602993	1670.72	557.915	1670.72	557.913	3	22
1	167.84	57.1	P02760	AMBP_HUMAN	Protein AMBP OS=Homo sapiens GN=AMBP PE=1 SV=1	0	99	CVLFPYGGCQGNGNK	Carbamidomethyl(C)@1; Carbamidomethyl(C)@9; Deamidated(N)@12		0.00171793	1670.72	836.367	1670.72	836.366	2	14
1	167.84	57.1	P02760	AMBP_HUMAN	Protein AMBP OS=Homo sapiens GN=AMBP PE=1 SV=1	0	99	CVLFPYGGCQGNGNK	Carbamidomethyl(C)@1; Carbamidomethyl(C)@9		-2.01388	1667.72	556.914	1669.73	557.585	3	16
1	167.84	57.1	P02760	AMBP_HUMAN	Protein AMBP OS=Homo sapiens GN=AMBP PE=1 SV=1	0	99	CVLFPYGGCQGNGNK	Carbamidomethyl(C)@1; Carbamidomethyl(C)@9; Cation:Na@C-term		0.000169263	1691.72	564.913	1691.72	564.913	3	14
1	167.84	57.1	P02760	AMBP_HUMAN	Protein AMBP OS=Homo sapiens GN=AMBP PE=1 SV=1	0	99	CVLFPYGGCQGNGNK	Carbamidomethyl(C)@1; Pro->pyro-Glu(P)@5; Carbamidomethyl(C)@9		0.0387314	1683.75	562.258	1683.71	562.245	3	15
1	167.84	57.1	P02760	AMBP_HUMAN	Protein AMBP OS=Homo sapiens GN=AMBP PE=1 SV=1	0	99	CVLFPYGGCQGNGNK	Carbamidomethyl(C)@1; Carbamidomethyl(C)@9; Cation:Na@C-term		0.000169263	1691.72	564.913	1691.72	564.913	3	14
1	167.84	57.1	P02760	AMBP_HUMAN	Protein AMBP OS=Homo sapiens GN=AMBP PE=1 SV=1	0	99	CVLFPYGGCQGNGNK	Carbamidomethyl(C)@1; Pro->pyro-Glu(P)@5; Carbamidomethyl(C)@9		0.0387314	1683.75	562.258	1683.71	562.245	3	14
1	167.84	57.1	P02760	AMBP_HUMAN	Protein AMBP OS=Homo sapiens GN=AMBP PE=1 SV=1	0	99	CVLFPYGGCQGNGNK	Carbamidomethyl(C)@1; Carbamidomethyl(C)@9; Ammonia-loss(N)@12		0.0025194	1652.71	551.911	1652.71	551.91	3	16
1	167.84	57.1	P02760	AMBP_HUMAN	Protein AMBP OS=Homo sapiens GN=AMBP PE=1 SV=1	0	99	CVLFPYGGCQGNGNK	Carbamidomethyl(C)@1; Carbamidomethyl(C)@9; Ammonia-loss(N)@14		-0.00277354	1652.7	827.36	1652.71	827.361	2	12
1	167.84	57.1	P02760	AMBP_HUMAN	Protein AMBP OS=Homo sapiens GN=AMBP PE=1 SV=1	0	99	CVLFPYGGCQGNGNK	Carbamidomethyl(C)@1; Carbamidomethyl(C)@9; Ammonia-loss(N)@14		-0.00277354	1652.7	827.36	1652.71	827.361	2	12
1	167.84	57.1	P02760	AMBP_HUMAN	Protein AMBP OS=Homo sapiens GN=AMBP PE=1 SV=1	0	99	CVLFPYGGCQGNGNK	Carbamidomethyl(C)@1; Dioxidation(F)@4; Carbamidomethyl(C)@9		-0.00766176	1701.72	568.246	1701.72	568.249	3	14
1	167.84	57.1	P02760	AMBP_HUMAN	Protein AMBP OS=Homo sapiens GN=AMBP PE=1 SV=1	0	99	CVLFPYGGCQGNGNK	Carbamidomethyl(C)@1; Carbamidomethyl(C)@9; Deamidated(N)@12; Cation:Na@C-term		0.00546576	1692.71	565.242	1692.7	565.241	3	14
1	167.84	57.1	P02760	AMBP_HUMAN	Protein AMBP OS=Homo sapiens GN=AMBP PE=1 SV=1	0	99	CVLFPYGGCQGNGNK	Carbamidomethyl(C)@1; Carbamidomethyl(C)@9; Deamidated(Q)@10; Deamidated(N)@12		0.00151341	1671.7	836.859	1671.7	836.858	2	14
1	167.84	57.1	P02760	AMBP_HUMAN	Protein AMBP OS=Homo sapiens GN=AMBP PE=1 SV=1	0	99	CVLFPYGGCQGNGNK	Carbamidomethyl(C)@1; Carbamidomethyl(C)@9; Deamidated(Q)@10; Deamidated(N)@12		0.0059184	1671.71	558.243	1671.7	558.241	3	15
1	167.84	57.1	P02760	AMBP_HUMAN	Protein AMBP OS=Homo sapiens GN=AMBP PE=1 SV=1	0	99	CVLFPYGGCQGNGNK	Carbamidomethyl(C)@1; Oxidation(P)@5; Carbamidomethyl(C)@9; Deamidated(N)@12		0.0106641	1686.72	563.249	1686.71	563.245	3	12
1	167.84	57.1	P02760	AMBP_HUMAN	Protein AMBP OS=Homo sapiens GN=AMBP PE=1 SV=1	0	99	CVLFPYGGCQGNGNK	Carbamidomethyl(C)@1; Pro->pyro-Glu(P)@5; Carbamidomethyl(C)@9; Deamidated(N)@12		0.0381686	1684.74	562.586	1684.7	562.573	3	14
1	167.84	57.1	P02760	AMBP_HUMAN	Protein AMBP OS=Homo sapiens GN=AMBP PE=1 SV=1	0	99	CVLFPYGGCQGNGNK	Carbamidomethyl(C)@1; Carbamidomethyl(C)@9; Deamidated(Q)@10; Deamidated(N)@12		0.0011472	1671.7	836.859	1671.7	836.858	2	17
1	167.84	57.1	P02760	AMBP_HUMAN	Protein AMBP OS=Homo sapiens GN=AMBP PE=1 SV=1	0	99	CVLFPYGGCQGNGNK	Carbamidomethyl(C)@1; Carbamidomethyl(C)@9; Deamidated(Q)@10; Deamidated(N)@12		0.0057353	1671.71	558.243	1671.7	558.241	3	18
1	167.84	57.1	P02760	AMBP_HUMAN	Protein AMBP OS=Homo sapiens GN=AMBP PE=1 SV=1	0	99	CVLFPYGGCQGNGNK	Carbamidomethyl(C)@1; Carbamidomethyl(C)@9; Deamidated(Q)@10; Deamidated(N)@12		0.0011472	1671.7	836.859	1671.7	836.858	2	16
1	167.84	57.1	P02760	AMBP_HUMAN	Protein AMBP OS=Homo sapiens GN=AMBP PE=1 SV=1	0	99	CVLFPYGGCQGNGNK	Carbamidomethyl(C)@1; Carbamidomethyl(C)@9		-8.05009	1661.68	554.902	1669.73	557.585	3	15
1	167.84	57.1	P02760	AMBP_HUMAN	Protein AMBP OS=Homo sapiens GN=AMBP PE=1 SV=1	0	99	CVLFPYGGCQGNGNK	Carbamidomethyl(C)@1; Carbamidomethyl(C)@9; Cation:Na@C-term		0.00245531	1691.72	564.913	1691.72	564.913	3	12
1	167.84	57.1	P02760	AMBP_HUMAN	Protein AMBP OS=Homo sapiens GN=AMBP PE=1 SV=1	0	99	CVLFPYGGCQGNGNK	Carbamidomethyl(C)@1; Carbamidomethyl(C)@9		0.0017486	1669.74	835.875	1669.73	835.874	2	14
1	167.84	57.1	P02760	AMBP_HUMAN	Protein AMBP OS=Homo sapiens GN=AMBP PE=1 SV=1	0	99	CVLFPYGGCQGNGNK	Carbamidomethyl(C)@1; Pro->pyro-Glu(P)@5; Carbamidomethyl(C)@9; Deamidated(N)@12		0.0318106	1684.73	843.372	1684.7	843.356	2	12
1	167.84	57.1	P02760	AMBP_HUMAN	Protein AMBP OS=Homo sapiens GN=AMBP PE=1 SV=1	0	99	CVLFPYGGCQGNGNK	Carbamidomethyl(C)@1; Carbamidomethyl(C)@9; Deamidated(N)@12		2.85069e-05	1670.72	836.366	1670.72	836.366	2	12
1	167.84	57.1	P02760	AMBP_HUMAN	Protein AMBP OS=Homo sapiens GN=AMBP PE=1 SV=1	0	99	CVLFPYGGCQGNGNK	Carbamidomethyl(C)@1; Carbamidomethyl(C)@9; Ammonia-loss(N)@12		0.00310381	1652.71	827.363	1652.71	827.361	2	11
1	167.84	57.1	P02760	AMBP_HUMAN	Protein AMBP OS=Homo sapiens GN=AMBP PE=1 SV=1	0	99	CVLFPYGGCQGNGNK	Carbamidomethyl(C)@1; Pro->pyro-Glu(P)@5; Carbamidomethyl(C)@9; Deamidated(N)@12		0.0362039	1684.73	562.585	1684.7	562.573	3	15
1	167.84	57.1	P02760	AMBP_HUMAN	Protein AMBP OS=Homo sapiens GN=AMBP PE=1 SV=1	0	99	CVLFPYGGCQGNGNK	Carbamidomethyl(C)@1; Pro->pyro-Glu(P)@5; Carbamidomethyl(C)@9; Deamidated(N)@12		0.0362039	1684.73	562.585	1684.7	562.573	3	15
1	167.84	57.1	P02760	AMBP_HUMAN	Protein AMBP OS=Homo sapiens GN=AMBP PE=1 SV=1	0	99	CVLFPYGGCQGNGNK	Carbamidomethyl(C)@1; Carbamidomethyl(C)@9; Deamidated(N)@12		-0.00108521	1670.72	836.366	1670.72	836.366	2	16
1	167.84	57.1	P02760	AMBP_HUMAN	Protein AMBP OS=Homo sapiens GN=AMBP PE=1 SV=1	0	99	CVLFPYGGCQGNGNK	Carbamidomethyl(C)@1; Carbamidomethyl(C)@9		0.00727143	1669.74	557.588	1669.73	557.585	3	19
1	167.84	57.1	P02760	AMBP_HUMAN	Protein AMBP OS=Homo sapiens GN=AMBP PE=1 SV=1	0	99	CVLFPYGGCQGNGNK	Carbamidomethyl(C)@1; Carbamidomethyl(C)@9		0.00323863	1669.74	557.586	1669.73	557.585	3	19
1	167.84	57.1	P02760	AMBP_HUMAN	Protein AMBP OS=Homo sapiens GN=AMBP PE=1 SV=1	0	99	CVLFPYGGCQGNGNK	Carbamidomethyl(C)@1; Carbamidomethyl(C)@9		-0.00125436	1669.73	835.874	1669.73	835.874	2	19
1	167.84	57.1	P02760	AMBP_HUMAN	Protein AMBP OS=Homo sapiens GN=AMBP PE=1 SV=1	0	99	CVLFPYGGCQGNGNK	Carbamidomethyl(C)@1; Carbamidomethyl(C)@9; Deamidated(N)@12		0.00706704	1670.72	557.916	1670.72	557.913	3	19
1	167.84	57.1	P02760	AMBP_HUMAN	Protein AMBP OS=Homo sapiens GN=AMBP PE=1 SV=1	0	99	CVLFPYGGCQGNGNK	Carbamidomethyl(C)@1; Carbamidomethyl(C)@9; Cation:Na@C-term		0.00142276	1691.72	564.913	1691.72	564.913	3	16
1	167.84	57.1	P02760	AMBP_HUMAN	Protein AMBP OS=Homo sapiens GN=AMBP PE=1 SV=1	0	99	CVLFPYGGCQGNGNK	Carbamidomethyl(C)@1; Carbamidomethyl(C)@9		0.000444871	1669.73	835.875	1669.73	835.874	2	17
1	167.84	57.1	P02760	AMBP_HUMAN	Protein AMBP OS=Homo sapiens GN=AMBP PE=1 SV=1	0	99	CVLFPYGGCQGNGNK	Carbamidomethyl(C)@1; Carbamidomethyl(C)@9; Ammonia-loss(N)@14		-0.0017197	1652.71	827.36	1652.71	827.361	2	15
1	167.84	57.1	P02760	AMBP_HUMAN	Protein AMBP OS=Homo sapiens GN=AMBP PE=1 SV=1	0	99	CVLFPYGGCQGNGNK	Carbamidomethyl(C)@1; Carbamidomethyl(C)@9; Deamidated(N)@12; Cation:Na@C-term		-0.00023639	1692.7	565.24	1692.7	565.241	3	16
1	167.84	57.1	P02760	AMBP_HUMAN	Protein AMBP OS=Homo sapiens GN=AMBP PE=1 SV=1	0	99	CVLFPYGGCQGNGNK	Carbamidomethyl(C)@1; Carbamidomethyl(C)@9; Deamidated(N)@12		0.00292483	1670.72	557.914	1670.72	557.913	3	18
1	167.84	57.1	P02760	AMBP_HUMAN	Protein AMBP OS=Homo sapiens GN=AMBP PE=1 SV=1	0	99	CVLFPYGGCQGNGNK	Carbamidomethyl(C)@1; Pro->pyro-Glu(P)@5; Carbamidomethyl(C)@9; Deamidated(N)@12		0.0352399	1684.73	562.585	1684.7	562.573	3	13
1	167.84	57.1	P02760	AMBP_HUMAN	Protein AMBP OS=Homo sapiens GN=AMBP PE=1 SV=1	0	99	CVLFPYGGCQGNGNK	Carbamidomethyl(C)@1; Carbamidomethyl(C)@9; Deamidated(N)@12		0.000917956	1670.72	836.367	1670.72	836.366	2	13
1	167.84	57.1	P02760	AMBP_HUMAN	Protein AMBP OS=Homo sapiens GN=AMBP PE=1 SV=1	0	99	CVLFPYGGCQGNGNK	Carbamidomethyl(C)@1; Pro->pyro-Glu(P)@5; Carbamidomethyl(C)@9; Deamidated(N)@12		0.0381686	1684.74	562.586	1684.7	562.573	3	13
1	167.84	57.1	P02760	AMBP_HUMAN	Protein AMBP OS=Homo sapiens GN=AMBP PE=1 SV=1	0	99	CVLFPYGGCQGNGNK	Carbamidomethyl(C)@1; Pro->pyro-Glu(P)@5; Carbamidomethyl(C)@9; Deamidated(N)@12		0.0385348	1684.74	562.586	1684.7	562.573	3	13
1	167.84	57.1	P02760	AMBP_HUMAN	Protein AMBP OS=Homo sapiens GN=AMBP PE=1 SV=1	0	99	CVLFPYGGCQGNGNK	Carbamidomethyl(C)@1; Amino(Y)@6; Carbamidomethyl(C)@9; Deamidated(N)@12		-0.00836519	1685.72	562.914	1685.73	562.917	3	13
1	167.84	57.1	P02760	AMBP_HUMAN	Protein AMBP OS=Homo sapiens GN=AMBP PE=1 SV=1	0	99	CVLFPYGGCQGNGNK	Carbamidomethyl(C)@1; Carbamidomethyl(C)@9; Deamidated(Q)@10; Deamidated(N)@12		-0.0020266	1671.7	836.857	1671.7	836.858	2	11
1	167.84	57.1	P02760	AMBP_HUMAN	Protein AMBP OS=Homo sapiens GN=AMBP PE=1 SV=1	0	99	CVLFPYGGCQGNGNK	Carbamidomethyl(C)@1; Carbamidomethyl(C)@9		-9.0372	1660.7	831.356	1669.73	835.874	2	13
1	167.84	57.1	P02760	AMBP_HUMAN	Protein AMBP OS=Homo sapiens GN=AMBP PE=1 SV=1	0	99	CVLFPYGGCQGNGNK	Carbamidomethyl(C)@1; Carbamidomethyl(C)@9; Deamidated(N)@14		0.000516786	1670.72	836.367	1670.72	836.366	2	14
1	167.84	57.1	P02760	AMBP_HUMAN	Protein AMBP OS=Homo sapiens GN=AMBP PE=1 SV=1	0	99	CVLFPYGGCQGNGNK	Carbamidomethyl(C)@1; Carbamidomethyl(C)@9; Ammonia-loss(N)@12		-0.000129048	1652.71	827.361	1652.71	827.361	2	13
1	167.84	57.1	P02760	AMBP_HUMAN	Protein AMBP OS=Homo sapiens GN=AMBP PE=1 SV=1	0	99	CVLFPYGGCQGNGNK	Carbamidomethyl(C)@1; Carbamidomethyl(C)@9; Ammonia-loss(N)@12		-0.000129048	1652.71	827.361	1652.71	827.361	2	14
1	167.84	57.1	P02760	AMBP_HUMAN	Protein AMBP OS=Homo sapiens GN=AMBP PE=1 SV=1	0	99	CVLFPYGGCQGNGNK	Carbamidomethyl(C)@1; Carbamidomethyl(C)@9; Cation:Na@C-term		0.000701031	1691.72	564.913	1691.72	564.913	3	16
1	167.84	57.1	P02760	AMBP_HUMAN	Protein AMBP OS=Homo sapiens GN=AMBP PE=1 SV=1	0	99	CVLFPYGGCQGNGNK	Carbamidomethyl(C)@1; Pro->pyro-Glu(P)@5; Carbamidomethyl(C)@9		0.037794	1683.75	562.258	1683.71	562.245	3	16
1	167.84	57.1	P02760	AMBP_HUMAN	Protein AMBP OS=Homo sapiens GN=AMBP PE=1 SV=1	0	99	CVLFPYGGCQGNGNK	Carbamidomethyl(C)@1; Pro->pyro-Glu(P)@5; Carbamidomethyl(C)@9		0.037794	1683.75	562.258	1683.71	562.245	3	13
1	167.84	57.1	P02760	AMBP_HUMAN	Protein AMBP OS=Homo sapiens GN=AMBP PE=1 SV=1	0	99	CVLFPYGGCQGNGNK	Carbamidomethyl(C)@1; Carbamidomethyl(C)@9; Ammonia-loss(N)@14		0.00119302	1652.71	827.362	1652.71	827.361	2	13
1	167.84	57.1	P02760	AMBP_HUMAN	Protein AMBP OS=Homo sapiens GN=AMBP PE=1 SV=1	0	99	CVLFPYGGCQGNGNK	Carbamidomethyl(C)@1; Carbamidomethyl(C)@9; Ammonia-loss(N)@14		0.00119302	1652.71	827.362	1652.71	827.361	2	13
1	167.84	57.1	P02760	AMBP_HUMAN	Protein AMBP OS=Homo sapiens GN=AMBP PE=1 SV=1	0	99	CVLFPYGGCQGNGNK	Carbamidomethyl(C)@1; Pro->pyro-Glu(P)@5; Carbamidomethyl(C)@9; Deamidated(N)@12		0.0375979	1684.73	562.586	1684.7	562.573	3	14
1	167.84	57.1	P02760	AMBP_HUMAN	Protein AMBP OS=Homo sapiens GN=AMBP PE=1 SV=1	0	99	CVLFPYGGCQGNGNK	Carbamidomethyl(C)@1; Carbamidomethyl(C)@9; Deamidated(Q)@10; Deamidated(N)@12		0.00585849	1671.71	836.861	1671.7	836.858	2	14
1	167.84	57.1	P02760	AMBP_HUMAN	Protein AMBP OS=Homo sapiens GN=AMBP PE=1 SV=1	0	99	CVLFPYGGCQGNGNK	Carbamidomethyl(C)@1; Carbamidomethyl(C)@9; Deamidated(N)@14		0.00242385	1670.72	557.914	1670.72	557.913	3	16
1	167.84	57.1	P02760	AMBP_HUMAN	Protein AMBP OS=Homo sapiens GN=AMBP PE=1 SV=1	0	99	CVLFPYGGCQGNGNK	Carbamidomethyl(C)@1; Carbamidomethyl(C)@9; Deamidated(N)@12; Cation:Na@C-term		-0.00169231	1692.7	565.24	1692.7	565.241	3	13
1	167.84	57.1	P02760	AMBP_HUMAN	Protein AMBP OS=Homo sapiens GN=AMBP PE=1 SV=1	0	99	CVLFPYGGCQGNGNK	Carbamidomethyl(C)@1; Pro->pyro-Glu(P)@5; Carbamidomethyl(C)@9; Deamidated(N)@12		0.0321169	1684.73	843.372	1684.7	843.356	2	13
1	167.84	57.1	P02760	AMBP_HUMAN	Protein AMBP OS=Homo sapiens GN=AMBP PE=1 SV=1	0	99	CVLFPYGGCQGNGNK	Carbamidomethyl(C)@1; Carbamidomethyl(C)@9; Deamidated(N)@12; Cation:Na@C-term		-0.00169231	1692.7	565.24	1692.7	565.241	3	14
1	167.84	57.1	P02760	AMBP_HUMAN	Protein AMBP OS=Homo sapiens GN=AMBP PE=1 SV=1	0	99	CVLFPYGGCQGNGNK	Carbamidomethyl(C)@1; Pro->pyro-Glu(P)@5; Carbamidomethyl(C)@9; Deamidated(N)@12		0.0339358	1684.73	562.584	1684.7	562.573	3	14
1	167.84	57.1	P02760	AMBP_HUMAN	Protein AMBP OS=Homo sapiens GN=AMBP PE=1 SV=1	0	99	CVLFPYGGCQGNGNK	Carbamidomethyl(C)@1; Pro->pyro-Glu(P)@5; Carbamidomethyl(C)@9; Deamidated(N)@12		0.0339358	1684.73	562.584	1684.7	562.573	3	12
1	167.84	57.1	P02760	AMBP_HUMAN	Protein AMBP OS=Homo sapiens GN=AMBP PE=1 SV=1	0	99	CVLFPYGGCQGNGNK	Carbamidomethyl(C)@1; Carbamidomethyl(C)@9; Deamidated(Q)@10; Deamidated(N)@12		0.00259402	1671.7	558.242	1671.7	558.241	3	19
1	167.84	57.1	P02760	AMBP_HUMAN	Protein AMBP OS=Homo sapiens GN=AMBP PE=1 SV=1	0	99	CVLFPYGGCQGNGNK	Carbamidomethyl(C)@1; Carbamidomethyl(C)@9; Ammonia-loss(N)@12		0.000948884	1652.71	827.361	1652.71	827.361	2	13
1	167.84	57.1	P02760	AMBP_HUMAN	Protein AMBP OS=Homo sapiens GN=AMBP PE=1 SV=1	0	99	CVLFPYGGCQGNGNK	Carbamidomethyl(C)@1; Carbamidomethyl(C)@9; Ammonia-loss(N)@12		0.000948884	1652.71	827.361	1652.71	827.361	2	11
1	167.84	57.1	P02760	AMBP_HUMAN	Protein AMBP OS=Homo sapiens GN=AMBP PE=1 SV=1	0	99	CVLFPYGGCQGNGNK	Carbamidomethyl(C)@1; Oxidation(P)@5; Carbamidomethyl(C)@9; Deamidated(N)@12		0.022274	1686.74	844.375	1686.71	844.364	2	14
1	167.84	57.1	P02760	AMBP_HUMAN	Protein AMBP OS=Homo sapiens GN=AMBP PE=1 SV=1	0	99	CVLFPYGGCQGNGNK	Carbamidomethyl(C)@1; Carbamidomethyl(C)@9; Cation:Na@C-term		0.00421945	1691.72	564.914	1691.72	564.913	3	13
1	167.84	57.1	P02760	AMBP_HUMAN	Protein AMBP OS=Homo sapiens GN=AMBP PE=1 SV=1	0	99	CVLFPYGGCQGNGNK	Carbamidomethyl(C)@1; Carbamidomethyl(C)@9; Ammonia-loss(N)@12		-0.000671784	1652.71	827.361	1652.71	827.361	2	12
1	167.84	57.1	P02760	AMBP_HUMAN	Protein AMBP OS=Homo sapiens GN=AMBP PE=1 SV=1	0	99	CVLFPYGGCQGNGNK	Carbamidomethyl(C)@1; Carbamidomethyl(C)@9		0.00323863	1669.74	557.586	1669.73	557.585	3	17
1	167.84	57.1	P02760	AMBP_HUMAN	Protein AMBP OS=Homo sapiens GN=AMBP PE=1 SV=1	0	99	CVLFPYGGCQGNGNK	Carbamidomethyl(C)@1; Pro->pyro-Glu(P)@5; Carbamidomethyl(C)@9		0.0396	1683.75	562.258	1683.71	562.245	3	14
1	167.84	57.1	P02760	AMBP_HUMAN	Protein AMBP OS=Homo sapiens GN=AMBP PE=1 SV=1	0	99	CVLFPYGGCQGNGNK	Carbamidomethyl(C)@1; Dioxidation(F)@4; Carbamidomethyl(C)@9		-0.0206669	1701.7	568.242	1701.72	568.249	3	15
1	167.84	57.1	P02760	AMBP_HUMAN	Protein AMBP OS=Homo sapiens GN=AMBP PE=1 SV=1	0	99	CVLFPYGGCQGNGNK	Carbamidomethyl(C)@1; Carbamidomethyl(C)@9; Deamidated(N)@12		0.000676723	1670.72	836.367	1670.72	836.366	2	17
1	167.84	57.1	P02760	AMBP_HUMAN	Protein AMBP OS=Homo sapiens GN=AMBP PE=1 SV=1	0	99	CVLFPYGGCQGNGNK	Carbamidomethyl(C)@1; Carbamidomethyl(C)@9; Deamidated(Q)@10; Deamidated(N)@12		0.00950543	1671.71	558.245	1671.7	558.241	3	13
1	167.84	57.1	P02760	AMBP_HUMAN	Protein AMBP OS=Homo sapiens GN=AMBP PE=1 SV=1	0	99	CVLFPYGGCQGNGNK	Carbamidomethyl(C)@1; Carbamidomethyl(C)@9		-0.00092859	1669.73	835.874	1669.73	835.874	2	17
1	167.84	57.1	P02760	AMBP_HUMAN	Protein AMBP OS=Homo sapiens GN=AMBP PE=1 SV=1	0	99	CVLFPYGGCQGNGNK	Carbamidomethyl(C)@1; Carbamidomethyl(C)@9; Deamidated(N)@12; Cation:Na@C-term		0.0010536	1692.7	565.241	1692.7	565.241	3	14
1	167.84	57.1	P02760	AMBP_HUMAN	Protein AMBP OS=Homo sapiens GN=AMBP PE=1 SV=1	0	99	CVLFPYGGCQGNGNK	Carbamidomethyl(C)@1; Carbamidomethyl(C)@9; Deamidated(N)@12		-0.00509735	1670.71	836.364	1670.72	836.366	2	16
1	167.84	57.1	P02760	AMBP_HUMAN	Protein AMBP OS=Homo sapiens GN=AMBP PE=1 SV=1	0	99	CVLFPYGGCQGNGNK	Carbamidomethyl(C)@1; Carbamidomethyl(C)@9; Deamidated(N)@12		0.00226711	1670.72	836.367	1670.72	836.366	2	17
1	167.84	57.1	P02760	AMBP_HUMAN	Protein AMBP OS=Homo sapiens GN=AMBP PE=1 SV=1	0	99	CVLFPYGGCQGNGNK	Carbamidomethyl(C)@1; Pro->pyro-Glu(P)@5; Carbamidomethyl(C)@9; Deamidated(N)@12		0.0388564	1684.74	562.586	1684.7	562.573	3	14
1	167.84	57.1	P02760	AMBP_HUMAN	Protein AMBP OS=Homo sapiens GN=AMBP PE=1 SV=1	0	99	CVLFPYGGCQGNGNK	Carbamidomethyl(C)@1; Pro->pyro-Glu(P)@5; Carbamidomethyl(C)@9		0.039009	1683.75	562.258	1683.71	562.245	3	12
1	167.84	57.1	P02760	AMBP_HUMAN	Protein AMBP OS=Homo sapiens GN=AMBP PE=1 SV=1	0	99	CVLFPYGGCQGNGNK	Carbamidomethyl(C)@1; Carbamidomethyl(C)@9; Deamidated(N)@12		0.00285566	1670.72	557.914	1670.72	557.913	3	16
1	167.84	57.1	P02760	AMBP_HUMAN	Protein AMBP OS=Homo sapiens GN=AMBP PE=1 SV=1	0	99	CVLFPYGGCQGNGNK	Carbamidomethyl(C)@1; Carbamidomethyl(C)@9		0.00289543	1669.74	557.586	1669.73	557.585	3	18
1	167.84	57.1	P02760	AMBP_HUMAN	Protein AMBP OS=Homo sapiens GN=AMBP PE=1 SV=1	0	99	CVLFPYGGCQGNGNK	Carbamidomethyl(C)@1; Carbamidomethyl(C)@9; Deamidated(N)@12		0.00263332	1670.72	836.368	1670.72	836.366	2	15
1	167.84	57.1	P02760	AMBP_HUMAN	Protein AMBP OS=Homo sapiens GN=AMBP PE=1 SV=1	0	99	CVLFPYGGCQGNGNK	Carbamidomethyl(C)@1; Carbamidomethyl(C)@9; Deamidated(N)@12		6.63753e-05	1670.72	836.366	1670.72	836.366	2	14
1	167.84	57.1	P02760	AMBP_HUMAN	Protein AMBP OS=Homo sapiens GN=AMBP PE=1 SV=1	0	99	CVLFPYGGCQGNGNK	Carbamidomethyl(C)@1; Carbamidomethyl(C)@9; Deamidated(N)@12; Cation:Na@C-term		0.00236593	1692.7	565.241	1692.7	565.241	3	13
1	167.84	57.1	P02760	AMBP_HUMAN	Protein AMBP OS=Homo sapiens GN=AMBP PE=1 SV=1	0	99	CVLFPYGGCQGNGNK	Carbamidomethyl(C)@1; Carbamidomethyl(C)@9; Cation:Na@C-term		-0.00121397	1691.71	564.912	1691.72	564.913	3	14
1	167.84	57.1	P02760	AMBP_HUMAN	Protein AMBP OS=Homo sapiens GN=AMBP PE=1 SV=1	0	99	CVLFPYGGCQGNGNK	Carbamidomethyl(C)@1; Carbamidomethyl(C)@9		0.00665844	1669.74	557.587	1669.73	557.585	3	22
1	167.84	57.1	P02760	AMBP_HUMAN	Protein AMBP OS=Homo sapiens GN=AMBP PE=1 SV=1	0	99	CVLFPYGGCQGNGNK	Carbamidomethyl(C)@1; Carbamidomethyl(C)@9; Cation:Na@C-term		0.00208192	1691.72	564.913	1691.72	564.913	3	14
1	167.84	57.1	P02760	AMBP_HUMAN	Protein AMBP OS=Homo sapiens GN=AMBP PE=1 SV=1	0	99	CVLFPYGGCQGNGNK	Carbamidomethyl(C)@1; Carbamidomethyl(C)@9; Deamidated(N)@12		0.00298738	1670.72	557.914	1670.72	557.913	3	22
1	167.84	57.1	P02760	AMBP_HUMAN	Protein AMBP OS=Homo sapiens GN=AMBP PE=1 SV=1	0	99	CVLFPYGGCQGNGNK	Carbamidomethyl(C)@1; Pro->pyro-Glu(P)@5; Carbamidomethyl(C)@9; Deamidated(N)@12		0.0283778	1684.73	843.37	1684.7	843.356	2	12
1	167.84	57.1	P02760	AMBP_HUMAN	Protein AMBP OS=Homo sapiens GN=AMBP PE=1 SV=1	0	99	CVLFPYGGCQGNGNK	Carbamidomethyl(C)@1; Carbamidomethyl(C)@9; Deamidated(N)@12		0.0037198	1670.72	557.915	1670.72	557.913	3	20
1	167.84	57.1	P02760	AMBP_HUMAN	Protein AMBP OS=Homo sapiens GN=AMBP PE=1 SV=1	0	99	CVLFPYGGCQGNGNK	Carbamidomethyl(C)@1; Carbamidomethyl(C)@9; Deamidated(N)@12		0.0037198	1670.72	557.915	1670.72	557.913	3	23
1	167.84	57.1	P02760	AMBP_HUMAN	Protein AMBP OS=Homo sapiens GN=AMBP PE=1 SV=1	0	99	CVLFPYGGCQGNGNK	Carbamidomethyl(C)@1; Carbamidomethyl(C)@9; Deamidated(N)@12		0.00170329	1670.72	836.367	1670.72	836.366	2	20
1	167.84	57.1	P02760	AMBP_HUMAN	Protein AMBP OS=Homo sapiens GN=AMBP PE=1 SV=1	0	99	CVLFPYGGCQGNGNK	Carbamidomethyl(C)@1; Carbamidomethyl(C)@9; Ammonia-loss(N)@12		-0.000129048	1652.71	827.361	1652.71	827.361	2	13
1	167.84	57.1	P02760	AMBP_HUMAN	Protein AMBP OS=Homo sapiens GN=AMBP PE=1 SV=1	0	99	CVLFPYGGCQGNGNK	Carbamidomethyl(C)@1; Carbamidomethyl(C)@9; Ammonia-loss(N)@12		-0.0017197	1652.71	827.36	1652.71	827.361	2	13
1	167.84	57.1	P02760	AMBP_HUMAN	Protein AMBP OS=Homo sapiens GN=AMBP PE=1 SV=1	0	99	CVLFPYGGCQGNGNK	Carbamidomethyl(C)@1; Carbamidomethyl(C)@9		0.00163233	1669.74	557.586	1669.73	557.585	3	20
1	167.84	57.1	P02760	AMBP_HUMAN	Protein AMBP OS=Homo sapiens GN=AMBP PE=1 SV=1	0	99	CVLFPYGGCQGNGNK	Carbamidomethyl(C)@1; Carbamidomethyl(C)@9; Deamidated(N)@12		0.0041822	1670.72	557.915	1670.72	557.913	3	19
1	167.84	57.1	P02760	AMBP_HUMAN	Protein AMBP OS=Homo sapiens GN=AMBP PE=1 SV=1	0	99	CVLFPYGGCQGNGNK	Carbamidomethyl(C)@1; Carbamidomethyl(C)@9; Deamidated(N)@12		0.0041822	1670.72	557.915	1670.72	557.913	3	22
1	167.84	57.1	P02760	AMBP_HUMAN	Protein AMBP OS=Homo sapiens GN=AMBP PE=1 SV=1	0	99	CVLFPYGGCQGNGNK	Carbamidomethyl(C)@1; Carbamidomethyl(C)@9; Deamidated(N)@12		0.00509772	1670.72	557.915	1670.72	557.913	3	19
1	167.84	57.1	P02760	AMBP_HUMAN	Protein AMBP OS=Homo sapiens GN=AMBP PE=1 SV=1	0	99	CVLFPYGGCQGNGNK	Carbamidomethyl(C)@1; Carbamidomethyl(C)@9; Deamidated(N)@12		0.00509772	1670.72	557.915	1670.72	557.913	3	22
1	167.84	57.1	P02760	AMBP_HUMAN	Protein AMBP OS=Homo sapiens GN=AMBP PE=1 SV=1	0	99	CVLFPYGGCQGNGNK	Carbamidomethyl(C)@1; Carbamidomethyl(C)@9; Deamidated(N)@12		0.00509772	1670.72	557.915	1670.72	557.913	3	23
1	167.84	57.1	P02760	AMBP_HUMAN	Protein AMBP OS=Homo sapiens GN=AMBP PE=1 SV=1	0	99	CVLFPYGGCQGNGNK	Carbamidomethyl(C)@1; Carbamidomethyl(C)@9		-0.000954575	1669.73	557.585	1669.73	557.585	3	18
1	167.84	57.1	P02760	AMBP_HUMAN	Protein AMBP OS=Homo sapiens GN=AMBP PE=1 SV=1	0	99	CVLFPYGGCQGNGNK	Carbamidomethyl(C)@1; Carbamidomethyl(C)@9; Deamidated(N)@12		0.00343371	1670.72	557.914	1670.72	557.913	3	19
1	167.84	57.1	P02760	AMBP_HUMAN	Protein AMBP OS=Homo sapiens GN=AMBP PE=1 SV=1	0	99	CVLFPYGGCQGNGNK	Carbamidomethyl(C)@1; Carbamidomethyl(C)@9; Deamidated(N)@12		6.63753e-05	1670.72	836.366	1670.72	836.366	2	16
1	167.84	57.1	P02760	AMBP_HUMAN	Protein AMBP OS=Homo sapiens GN=AMBP PE=1 SV=1	0	99	CVLFPYGGCQGNGNK	Carbamidomethyl(C)@1; Carbamidomethyl(C)@9; Cation:Na@C-term		0.00146835	1691.72	564.913	1691.72	564.913	3	13
1	167.84	57.1	P02760	AMBP_HUMAN	Protein AMBP OS=Homo sapiens GN=AMBP PE=1 SV=1	0	99	CVLFPYGGCQGNGNK	Carbamidomethyl(C)@1; Carbamidomethyl(C)@9; Ammonia-loss(N)@12		0.00159064	1652.71	827.362	1652.71	827.361	2	12
1	167.84	57.1	P02760	AMBP_HUMAN	Protein AMBP OS=Homo sapiens GN=AMBP PE=1 SV=1	0	99	CVLFPYGGCQGNGNK	Carbamidomethyl(C)@1; Carbamidomethyl(C)@9; Deamidated(N)@12		0.00109379	1670.72	557.914	1670.72	557.913	3	16
1	167.84	57.1	P02760	AMBP_HUMAN	Protein AMBP OS=Homo sapiens GN=AMBP PE=1 SV=1	0	99	CVLFPYGGCQGNGNK	Carbamidomethyl(C)@1; Carbamidomethyl(C)@9; Ammonia-loss(N)@12		0.0023086	1652.71	827.362	1652.71	827.361	2	13
1	167.84	57.1	P02760	AMBP_HUMAN	Protein AMBP OS=Homo sapiens GN=AMBP PE=1 SV=1	0	99	CVLFPYGGCQGNGNK	Carbamidomethyl(C)@1; Carbamidomethyl(C)@9		0.00307853	1669.74	557.586	1669.73	557.585	3	17
1	167.84	57.1	P02760	AMBP_HUMAN	Protein AMBP OS=Homo sapiens GN=AMBP PE=1 SV=1	0	99	CVLFPYGGCQGNGNK	Carbamidomethyl(C)@1; Pro->pyro-Glu(P)@5; Carbamidomethyl(C)@9; Deamidated(N)@12		0.0402477	1684.74	562.587	1684.7	562.573	3	12
1	167.84	57.1	P02760	AMBP_HUMAN	Protein AMBP OS=Homo sapiens GN=AMBP PE=1 SV=1	0	99	CVLFPYGGCQGNGNK	Carbamidomethyl(C)@1; Carbamidomethyl(C)@9		0.00519192	1669.74	557.587	1669.73	557.585	3	24
1	167.84	57.1	P02760	AMBP_HUMAN	Protein AMBP OS=Homo sapiens GN=AMBP PE=1 SV=1	0	99	CVLFPYGGCQGNGNK	Carbamidomethyl(C)@1; Carbamidomethyl(C)@9		0.00519192	1669.74	557.587	1669.73	557.585	3	21
1	167.84	57.1	P02760	AMBP_HUMAN	Protein AMBP OS=Homo sapiens GN=AMBP PE=1 SV=1	0	99	CVLFPYGGCQGNGNK	Carbamidomethyl(C)@1; Carbamidomethyl(C)@9; Deamidated(N)@12		0.00305957	1670.72	836.368	1670.72	836.366	2	21
1	167.84	57.1	P02760	AMBP_HUMAN	Protein AMBP OS=Homo sapiens GN=AMBP PE=1 SV=1	0	99	CVLFPYGGCQGNGNK	Carbamidomethyl(C)@1; Carbamidomethyl(C)@9; Deamidated(N)@12		0.0091974	1670.73	557.916	1670.72	557.913	3	22
1	167.84	57.1	P02760	AMBP_HUMAN	Protein AMBP OS=Homo sapiens GN=AMBP PE=1 SV=1	0	99	CVLFPYGGCQGNGNK	Carbamidomethyl(C)@1; Carbamidomethyl(C)@9; Deamidated(N)@12		0.0091974	1670.73	557.916	1670.72	557.913	3	23
1	167.84	57.1	P02760	AMBP_HUMAN	Protein AMBP OS=Homo sapiens GN=AMBP PE=1 SV=1	0	99	CVLFPYGGCQGNGNK	Carbamidomethyl(C)@1; Carbamidomethyl(C)@9; Deamidated(N)@12		0.00305957	1670.72	836.368	1670.72	836.366	2	23
1	167.84	57.1	P02760	AMBP_HUMAN	Protein AMBP OS=Homo sapiens GN=AMBP PE=1 SV=1	0	99	CVLFPYGGCQGNGNK	Carbamidomethyl(C)@1; Carbamidomethyl(C)@9; Deamidated(N)@12; Cation:Na@C-term		0.00632551	1692.71	565.243	1692.7	565.241	3	16
1	167.84	57.1	P02760	AMBP_HUMAN	Protein AMBP OS=Homo sapiens GN=AMBP PE=1 SV=1	0	99	CVLFPYGGCQGNGNK	Carbamidomethyl(C)@1; Carbamidomethyl(C)@9; Deamidated(N)@12		0.0091974	1670.73	557.916	1670.72	557.913	3	22
1	167.84	57.1	P02760	AMBP_HUMAN	Protein AMBP OS=Homo sapiens GN=AMBP PE=1 SV=1	0	99	CVLFPYGGCQGNGNK	Carbamidomethyl(C)@1; Carbamidomethyl(C)@9; Deamidated(N)@12; Cation:Na@C-term		0.00236593	1692.7	565.241	1692.7	565.241	3	13
1	167.84	57.1	P02760	AMBP_HUMAN	Protein AMBP OS=Homo sapiens GN=AMBP PE=1 SV=1	0	99	CVLFPYGGCQGNGNK	Carbamidomethyl(C)@1; Carbamidomethyl(C)@9; Deamidated(Q)@10		0.00361353	1670.72	836.368	1670.72	836.366	2	17
1	167.84	57.1	P02760	AMBP_HUMAN	Protein AMBP OS=Homo sapiens GN=AMBP PE=1 SV=1	0	99	CVLFPYGGCQGNGNK	Carbamidomethyl(C)@1; Pro->pyro-Glu(P)@5; Carbamidomethyl(C)@9		0.0391426	1683.75	562.258	1683.71	562.245	3	13
1	167.84	57.1	P02760	AMBP_HUMAN	Protein AMBP OS=Homo sapiens GN=AMBP PE=1 SV=1	0	99	CVLFPYGGCQGNGNK	Carbamidomethyl(C)@1; Carbamidomethyl(C)@9; Deamidated(N)@12		0.00509772	1670.72	557.915	1670.72	557.913	3	18
1	167.84	57.1	P02760	AMBP_HUMAN	Protein AMBP OS=Homo sapiens GN=AMBP PE=1 SV=1	0	99	CVLFPYGGCQGNGNK	Carbamidomethyl(C)@1; Carbamidomethyl(C)@9		0.00665844	1669.74	557.587	1669.73	557.585	3	18
1	167.84	57.1	P02760	AMBP_HUMAN	Protein AMBP OS=Homo sapiens GN=AMBP PE=1 SV=1	0	99	CVLFPYGGCQGNGNK	Carbamidomethyl(C)@1; Carbamidomethyl(C)@9; Cation:Na@C-term		0.00305255	1691.72	564.914	1691.72	564.913	3	15
1	167.84	57.1	P02760	AMBP_HUMAN	Protein AMBP OS=Homo sapiens GN=AMBP PE=1 SV=1	0	99	CVLFPYGGCQGNGNK	Carbamidomethyl(C)@1; Carbamidomethyl(C)@9; Ammonia-loss(N)@14		-0.00116462	1652.71	827.361	1652.71	827.361	2	14
1	167.84	57.1	P02760	AMBP_HUMAN	Protein AMBP OS=Homo sapiens GN=AMBP PE=1 SV=1	0	99	CVLFPYGGCQGNGNK	Carbamidomethyl(C)@1; Carbamidomethyl(C)@9; Ammonia-loss(N)@14		-0.00116462	1652.71	827.361	1652.71	827.361	2	14
1	167.84	57.1	P02760	AMBP_HUMAN	Protein AMBP OS=Homo sapiens GN=AMBP PE=1 SV=1	0	99	CVLFPYGGCQGNGNK	Carbamidomethyl(C)@1; Carbamidomethyl(C)@9		0.00020394	1669.73	835.875	1669.73	835.874	2	16
1	167.84	57.1	P02760	AMBP_HUMAN	Protein AMBP OS=Homo sapiens GN=AMBP PE=1 SV=1	0	99	CVLFPYGGCQGNGNK	Carbamidomethyl(C)@1; Carbamidomethyl(C)@9; Deamidated(N)@12		0.00361353	1670.72	836.368	1670.72	836.366	2	16
1	167.84	57.1	P02760	AMBP_HUMAN	Protein AMBP OS=Homo sapiens GN=AMBP PE=1 SV=1	0	99	CVLFPYGGCQGNGNK	Carbamidomethyl(C)@1; Carbamidomethyl(C)@9; Deamidated(N)@12		0.000195569	1670.72	836.366	1670.72	836.366	2	16
1	167.84	57.1	P02760	AMBP_HUMAN	Protein AMBP OS=Homo sapiens GN=AMBP PE=1 SV=1	0	99	CVLFPYGGCQGNGNK	Carbamidomethyl(C)@1; Carbamidomethyl(C)@9		0.00163233	1669.74	557.586	1669.73	557.585	3	18
1	167.84	57.1	P02760	AMBP_HUMAN	Protein AMBP OS=Homo sapiens GN=AMBP PE=1 SV=1	0	99	CVLFPYGGCQGNGNK	Carbamidomethyl(C)@1; Carbamidomethyl(C)@9; Deamidated(N)@14		-0.00108521	1670.72	836.366	1670.72	836.366	2	14
1	167.84	57.1	P02760	AMBP_HUMAN	Protein AMBP OS=Homo sapiens GN=AMBP PE=1 SV=1	0	99	CVLFPYGGCQGNGNK	Carbamidomethyl(C)@1; Oxidation(P)@5; Carbamidomethyl(C)@9; Deamidated(N)@12		0.0016442	1686.71	844.365	1686.71	844.364	2	10
1	167.84	57.1	P02760	AMBP_HUMAN	Protein AMBP OS=Homo sapiens GN=AMBP PE=1 SV=1	0	99	CVLFPYGGCQGNGNK	Carbamidomethyl(C)@1; Pro->pyro-Glu(P)@5; Carbamidomethyl(C)@9; Deamidated(N)@12		0.039772	1684.74	562.586	1684.7	562.573	3	13
1	167.84	57.1	P02760	AMBP_HUMAN	Protein AMBP OS=Homo sapiens GN=AMBP PE=1 SV=1	0	99	CVLFPYGGCQGNGNK	Carbamidomethyl(C)@1; Pro->pyro-Glu(P)@5; Carbamidomethyl(C)@9; Deamidated(N)@12		0.039772	1684.74	562.586	1684.7	562.573	3	13
1	167.84	57.1	P02760	AMBP_HUMAN	Protein AMBP OS=Homo sapiens GN=AMBP PE=1 SV=1	0	99	CVLFPYGGCQGNGNK	Carbamidomethyl(C)@1; Carbamidomethyl(C)@9		0.00665844	1669.74	557.587	1669.73	557.585	3	17
1	167.84	57.1	P02760	AMBP_HUMAN	Protein AMBP OS=Homo sapiens GN=AMBP PE=1 SV=1	0	99	CVLFPYGGCQGNGNK	Carbamidomethyl(C)@1; Carbamidomethyl(C)@9; Deamidated(N)@12		-0.00171467	1670.72	836.365	1670.72	836.366	2	17
1	167.84	57.1	P02760	AMBP_HUMAN	Protein AMBP OS=Homo sapiens GN=AMBP PE=1 SV=1	0	99	CVLFPYGGCQGNGNK	Carbamidomethyl(C)@1; Carbamidomethyl(C)@9; Deamidated(N)@12		0.00194742	1670.72	836.367	1670.72	836.366	2	17
1	167.84	57.1	P02760	AMBP_HUMAN	Protein AMBP OS=Homo sapiens GN=AMBP PE=1 SV=1	0	99	CVLFPYGGCQGNGNK	Carbamidomethyl(C)@1; Carbamidomethyl(C)@9; Deamidated(N)@12		-0.00188323	1670.72	836.365	1670.72	836.366	2	12
1	167.84	57.1	P02760	AMBP_HUMAN	Protein AMBP OS=Homo sapiens GN=AMBP PE=1 SV=1	0	99	CVLFPYGGCQGNGNK	Carbamidomethyl(C)@1; Pro->pyro-Glu(P)@5; Carbamidomethyl(C)@9		0.0453201	1683.76	562.26	1683.71	562.245	3	13
1	167.84	57.1	P02760	AMBP_HUMAN	Protein AMBP OS=Homo sapiens GN=AMBP PE=1 SV=1	0	99	CVLFPYGGCQGNGNK	Carbamidomethyl(C)@1; Carbamidomethyl(C)@9; Ammonia-loss(N)@12		-0.00298727	1652.7	827.36	1652.71	827.361	2	12
1	167.84	57.1	P02760	AMBP_HUMAN	Protein AMBP OS=Homo sapiens GN=AMBP PE=1 SV=1	0	99	CVLFPYGGCQGNGNK	Carbamidomethyl(C)@1; Carbamidomethyl(C)@9		0.00519192	1669.74	557.587	1669.73	557.585	3	19
1	167.84	57.1	P02760	AMBP_HUMAN	Protein AMBP OS=Homo sapiens GN=AMBP PE=1 SV=1	0	99	CVLFPYGGCQGNGNK	Carbamidomethyl(C)@1; Carbamidomethyl(C)@9; Deamidated(N)@12		0.00305957	1670.72	836.368	1670.72	836.366	2	19
1	167.84	57.1	P02760	AMBP_HUMAN	Protein AMBP OS=Homo sapiens GN=AMBP PE=1 SV=1	0	99	CVLFPYGGCQGNGNK	Carbamidomethyl(C)@1; Carbamidomethyl(C)@9; Deamidated(N)@12		0.00305957	1670.72	836.368	1670.72	836.366	2	19
1	167.84	57.1	P02760	AMBP_HUMAN	Protein AMBP OS=Homo sapiens GN=AMBP PE=1 SV=1	0	99	CVLFPYGGCQGNGNK	Carbamidomethyl(C)@1; Carbamidomethyl(C)@9; Deamidated(N)@12		-0.000177764	1670.72	836.366	1670.72	836.366	2	15
1	167.84	57.1	P02760	AMBP_HUMAN	Protein AMBP OS=Homo sapiens GN=AMBP PE=1 SV=1	0	99	CVLFPYGGCQGNGNK	Carbamidomethyl(C)@1; Carbamidomethyl(C)@9		0.00445951	1669.74	557.587	1669.73	557.585	3	17
1	167.84	57.1	P02760	AMBP_HUMAN	Protein AMBP OS=Homo sapiens GN=AMBP PE=1 SV=1	0	99	CVLFPYGGCQGNGNK	Carbamidomethyl(C)@1; Carbamidomethyl(C)@9; Deamidated(N)@12		0.00397974	1670.72	836.368	1670.72	836.366	2	15
1	167.84	57.1	P02760	AMBP_HUMAN	Protein AMBP OS=Homo sapiens GN=AMBP PE=1 SV=1	0	99	CVLFPYGGCQGNGNK	Carbamidomethyl(C)@1; Carbamidomethyl(C)@9; Deamidated(Q)@10; Deamidated(N)@12		0.00544256	1671.71	558.243	1671.7	558.241	3	18
1	167.84	57.1	P02760	AMBP_HUMAN	Protein AMBP OS=Homo sapiens GN=AMBP PE=1 SV=1	0	99	CVLFPYGGCQGNGNK	Carbamidomethyl(C)@1; Carbamidomethyl(C)@9; Deamidated(Q)@10; Deamidated(N)@12		0.00311688	1671.71	836.86	1671.7	836.858	2	16
1	167.84	57.1	P02760	AMBP_HUMAN	Protein AMBP OS=Homo sapiens GN=AMBP PE=1 SV=1	0	99	CVLFPYGGCQGNGNK	Carbamidomethyl(C)@1; Carbamidomethyl(C)@9; Deamidated(Q)@10; Deamidated(N)@12		0.00544256	1671.71	558.243	1671.7	558.241	3	15
1	167.84	57.1	P02760	AMBP_HUMAN	Protein AMBP OS=Homo sapiens GN=AMBP PE=1 SV=1	0	99	CVLFPYGGCQGNGNK	Carbamidomethyl(C)@1; Pro->pyro-Glu(P)@5; Carbamidomethyl(C)@9		0.0374052	1683.75	562.258	1683.71	562.245	3	16
1	167.84	57.1	P02760	AMBP_HUMAN	Protein AMBP OS=Homo sapiens GN=AMBP PE=1 SV=1	0	99	CVLFPYGGCQGNGNK	Carbamidomethyl(C)@1; Carbamidomethyl(C)@9; Deamidated(N)@12		0.0088312	1670.73	557.916	1670.72	557.913	3	18
1	167.84	57.1	P02760	AMBP_HUMAN	Protein AMBP OS=Homo sapiens GN=AMBP PE=1 SV=1	0	99	CVLFPYGGCQGNGNKFYSEK	Carbamidomethyl(C)@1; Carbamidomethyl(C)@9	missed K-F@15	0.00828298	2324.04	775.688	2324.04	775.686	3	21
1	167.84	57.1	P02760	AMBP_HUMAN	Protein AMBP OS=Homo sapiens GN=AMBP PE=1 SV=1	0	99	CVLFPYGGCQGNGNKFYSEK	Carbamidomethyl(C)@1; Carbamidomethyl(C)@9; Deamidated(N)@14	missed K-F@15	0.00588797	2325.03	776.016	2325.02	776.014	3	17
1	167.84	57.1	P02760	AMBP_HUMAN	Protein AMBP OS=Homo sapiens GN=AMBP PE=1 SV=1	0	99	CVLFPYGGCQGNGNKFYSEK	Carbamidomethyl(C)@1; Carbamidomethyl(C)@9; Deamidated(N)@12	missed K-F@15	0.00936695	2325.03	776.017	2325.02	776.014	3	16
1	167.84	57.1	P02760	AMBP_HUMAN	Protein AMBP OS=Homo sapiens GN=AMBP PE=1 SV=1	0	99	CVLFPYGGCQGNGNKFYSEK	Carbamidomethyl(C)@1; Carbamidomethyl(C)@9; Deamidated(N)@12	missed K-F@15	0.00314141	2325.02	776.015	2325.02	776.014	3	21
1	167.84	57.1	P02760	AMBP_HUMAN	Protein AMBP OS=Homo sapiens GN=AMBP PE=1 SV=1	0	99	CVLFPYGGCQGNGNKFYSEK	Carbamidomethyl(C)@1; Carbamidomethyl(C)@9; Deamidated(N)@12	missed K-F@15	0.00314141	2325.02	776.015	2325.02	776.014	3	20
1	167.84	57.1	P02760	AMBP_HUMAN	Protein AMBP OS=Homo sapiens GN=AMBP PE=1 SV=1	0	99	CVLFPYGGCQGNGNKFYSEK	Carbamidomethyl(C)@1; Carbamidomethyl(C)@9	missed K-F@15	0.00204493	2324.04	775.687	2324.04	775.686	3	19
1	167.84	57.1	P02760	AMBP_HUMAN	Protein AMBP OS=Homo sapiens GN=AMBP PE=1 SV=1	0	99	CVLFPYGGCQGNGNKFYSEK	Carbamidomethyl(C)@1; Carbamidomethyl(C)@9; Deamidated(N)@12	missed K-F@15	-0.00254363	2325.02	776.013	2325.02	776.014	3	21
1	167.84	57.1	P02760	AMBP_HUMAN	Protein AMBP OS=Homo sapiens GN=AMBP PE=1 SV=1	0	99	CVLFPYGGCQGNGNKFYSEK	Carbamidomethyl(C)@1; Carbamidomethyl(C)@9; Deamidated(N)@12	missed K-F@15	0.00880974	2325.03	776.017	2325.02	776.014	3	20
1	167.84	57.1	P02760	AMBP_HUMAN	Protein AMBP OS=Homo sapiens GN=AMBP PE=1 SV=1	0	99	CVLFPYGGCQGNGNKFYSEK	Carbamidomethyl(C)@1; Carbamidomethyl(C)@9	missed K-F@15	0.0128904	2324.05	775.69	2324.04	775.686	3	20
1	167.84	57.1	P02760	AMBP_HUMAN	Protein AMBP OS=Homo sapiens GN=AMBP PE=1 SV=1	0	99	CVLFPYGGCQGNGNKFYSEK	Carbamidomethyl(C)@1; Carbamidomethyl(C)@9; Deamidated(N)@12	missed K-F@15	0.00847102	2325.03	776.017	2325.02	776.014	3	20
1	167.84	57.1	P02760	AMBP_HUMAN	Protein AMBP OS=Homo sapiens GN=AMBP PE=1 SV=1	0	99	CVLFPYGGCQGNGNKFYSEK	Carbamidomethyl(C)@1; Carbamidomethyl(C)@9; Deamidated(N)@12; Delta:H(2)C(2)(K)@15; Amino(Y)@17	missed K-F@15	0.012718	2366.06	789.693	2366.05	789.689	3	18
1	167.84	57.1	P02760	AMBP_HUMAN	Protein AMBP OS=Homo sapiens GN=AMBP PE=1 SV=1	0	99	CVLFPYGGCQGNGNKFYSEK	Carbamidomethyl(C)@1; Carbamidomethyl(C)@9; Deamidated(N)@12; Deamidated(N)@14	missed K-F@15	0.014113	2326.02	776.346	2326	776.342	3	21
1	167.84	57.1	P02760	AMBP_HUMAN	Protein AMBP OS=Homo sapiens GN=AMBP PE=1 SV=1	0	99	CVLFPYGGCQGNGNKFYSEK	Carbamidomethyl(C)@1; Carbamidomethyl(C)@9; Deamidated(N)@12; Deamidated(N)@14	missed K-F@15	0.014113	2326.02	776.346	2326	776.342	3	20
1	167.84	57.1	P02760	AMBP_HUMAN	Protein AMBP OS=Homo sapiens GN=AMBP PE=1 SV=1	0	99	CVLFPYGGCQGNGNKFYSEKECR	Carbamidomethyl(C)@1; Carbamidomethyl(C)@9; Deamidated(N)@12; Carbamidomethyl(C)@22	missed K-F@15; missed K-E@20	0.00637045	2770.2	693.557	2770.19	693.556	4	21
1	167.84	57.1	P02760	AMBP_HUMAN	Protein AMBP OS=Homo sapiens GN=AMBP PE=1 SV=1	0	99	DRGECVPGEQEPEPILIPRVRRAVLPQEEEGSGGGQLVTEVTKK	Carbamidomethyl(C)@5	cleaved A-D@N-term; missed R-G@2; missed R-V@19; missed R-R@21; missed R-A@22; missed K-K@43	-5.06189	4833.44	967.695	4838.5	968.707	5	15
1	167.84	57.1	P02760	AMBP_HUMAN	Protein AMBP OS=Homo sapiens GN=AMBP PE=1 SV=1	0	99	DRGECVPGEQEPEPILIPRVRRAVLPQEEEGSGGGQLVTEVTKK	Carbamidomethyl(C)@5	cleaved A-D@N-term; missed R-G@2; missed R-V@19; missed R-R@21; missed R-A@22; missed K-K@43	-5.06189	4833.44	967.695	4838.5	968.707	5	17
1	167.84	57.1	P02760	AMBP_HUMAN	Protein AMBP OS=Homo sapiens GN=AMBP PE=1 SV=1	0	99	ECLQTCR	Glu->pyro-Glu@N-term; Carbamidomethyl(C)@2; Carbamidomethyl(C)@6		-0.000266917	947.395	474.705	947.395	474.705	2	8
1	167.84	57.1	P02760	AMBP_HUMAN	Protein AMBP OS=Homo sapiens GN=AMBP PE=1 SV=1	0	99	ECLQTCR	Glu->pyro-Glu@N-term; Carbamidomethyl(C)@2; Carbamidomethyl(C)@6		-0.000266917	947.395	474.705	947.395	474.705	2	10
1	167.84	57.1	P02760	AMBP_HUMAN	Protein AMBP OS=Homo sapiens GN=AMBP PE=1 SV=1	0	99	ECLQTCR	Glu->pyro-Glu@N-term; Carbamidomethyl(C)@2; Deamidated(Q)@4; Carbamidomethyl(C)@6		-0.00358136	948.376	475.195	948.379	475.197	2	10
1	167.84	57.1	P02760	AMBP_HUMAN	Protein AMBP OS=Homo sapiens GN=AMBP PE=1 SV=1	0	99	ECLQTCR	Glu->pyro-Glu@N-term; Carbamidomethyl(C)@2; Deamidated(Q)@4; Carbamidomethyl(C)@6		-0.00358136	948.376	475.195	948.379	475.197	2	8
1	167.84	57.1	P02760	AMBP_HUMAN	Protein AMBP OS=Homo sapiens GN=AMBP PE=1 SV=1	0	99	ECLQTCR	Glu->pyro-Glu@N-term; Carbamidomethyl(C)@2; Carbamidomethyl(C)@6		-0.00361848	947.392	474.703	947.395	474.705	2	9
1	167.84	57.1	P02760	AMBP_HUMAN	Protein AMBP OS=Homo sapiens GN=AMBP PE=1 SV=1	0	99	ECLQTCRTVAACNLPIVR	Carbamidomethyl(C)@2; Didehydro(T)@5; Carbamidomethyl(C)@6; Carbamidomethyl(C)@12	missed R-T@7	-2.41655e-05	2158.04	720.356	2158.04	720.355	3	18
1	167.84	57.1	P02760	AMBP_HUMAN	Protein AMBP OS=Homo sapiens GN=AMBP PE=1 SV=1	0	99	ECLQTCRTVAACNLPIVR	Carbamidomethyl(C)@2; No Carbamidomethyl(C)@6; Carbamidomethyl(C)@12	missed R-T@7	0.0228508	2103.06	702.028	2103.04	702.02	3	13
1	167.84	57.1	P02760	AMBP_HUMAN	Protein AMBP OS=Homo sapiens GN=AMBP PE=1 SV=1	0	99	ECLQTCRTVAACNLPIVR	Carbamidomethyl(C)@2; No Carbamidomethyl(C)@6; Carbamidomethyl(C)@12	missed R-T@7	0.0203727	2103.06	702.027	2103.04	702.02	3	13
1	167.84	57.1	P02760	AMBP_HUMAN	Protein AMBP OS=Homo sapiens GN=AMBP PE=1 SV=1	0	99	ECLQTCRTVAACNLPIVR	Carbamidomethyl(C)@2; No Carbamidomethyl(C)@6; Carbamidomethyl(C)@12	missed R-T@7	0.0203727	2103.06	702.027	2103.04	702.02	3	13
1	167.84	57.1	P02760	AMBP_HUMAN	Protein AMBP OS=Homo sapiens GN=AMBP PE=1 SV=1	0	99	ECLQTCRTVAACNLPIVR	Carbamidomethyl(C)@2; No Carbamidomethyl(C)@6; Carbamidomethyl(C)@12	missed R-T@7	0.0205936	2103.06	702.027	2103.04	702.02	3	12
1	167.84	57.1	P02760	AMBP_HUMAN	Protein AMBP OS=Homo sapiens GN=AMBP PE=1 SV=1	0	99	ECLQTCRTVAACNLPIVR	Glu->pyro-Glu@N-term; Carbamidomethyl(C)@2; No Carbamidomethyl(C)@6; Carbamidomethyl(C)@12	missed R-T@7	0.0188069	2085.05	696.023	2085.03	696.017	3	13
1	167.84	57.1	P02760	AMBP_HUMAN	Protein AMBP OS=Homo sapiens GN=AMBP PE=1 SV=1	0	99	EDSCQLGY	Carbamidomethyl(C)@4	cleaved Y-S@C-term	-0.00295823	970.367	486.191	970.37	486.192	2	11
1	167.84	57.1	P02760	AMBP_HUMAN	Protein AMBP OS=Homo sapiens GN=AMBP PE=1 SV=1	0	99	EDSCQLGY	Carbamidomethyl(C)@4	cleaved Y-S@C-term	-0.00295823	970.367	486.191	970.37	486.192	2	11
1	167.84	57.1	P02760	AMBP_HUMAN	Protein AMBP OS=Homo sapiens GN=AMBP PE=1 SV=1	0	99	EDSCQLGY	Carbamidomethyl(C)@4	cleaved Y-S@C-term	-0.000183712	970.37	486.192	970.37	486.192	2	11
1	167.84	57.1	P02760	AMBP_HUMAN	Protein AMBP OS=Homo sapiens GN=AMBP PE=1 SV=1	0	99	EDSCQLGY	Carbamidomethyl(C)@4	cleaved Y-S@C-term	-0.000183712	970.37	486.192	970.37	486.192	2	11
1	167.84	57.1	P02760	AMBP_HUMAN	Protein AMBP OS=Homo sapiens GN=AMBP PE=1 SV=1	0	99	EDSCQLGY	Carbamidomethyl(C)@4	cleaved Y-S@C-term	-0.000183712	970.37	486.192	970.37	486.192	2	11
1	167.84	57.1	P02760	AMBP_HUMAN	Protein AMBP OS=Homo sapiens GN=AMBP PE=1 SV=1	0	99	EDSCQLGY	Glu->pyro-Glu@N-term; Carbamidomethyl(C)@4	cleaved Y-S@C-term	5.85346e-05	952.36	477.187	952.36	477.187	2	10
1	167.84	57.1	P02760	AMBP_HUMAN	Protein AMBP OS=Homo sapiens GN=AMBP PE=1 SV=1	0	99	EDSCQLGY	Glu->pyro-Glu@N-term; Carbamidomethyl(C)@4	cleaved Y-S@C-term	5.85346e-05	952.36	477.187	952.36	477.187	2	10
1	167.84	57.1	P02760	AMBP_HUMAN	Protein AMBP OS=Homo sapiens GN=AMBP PE=1 SV=1	0	99	EDSCQLGY	Carbamidomethyl(C)@4	cleaved Y-S@C-term	0.000274763	970.37	486.192	970.37	486.192	2	11
1	167.84	57.1	P02760	AMBP_HUMAN	Protein AMBP OS=Homo sapiens GN=AMBP PE=1 SV=1	0	99	EDSCQLGY	Carbamidomethyl(C)@4	cleaved Y-S@C-term	-0.00178649	970.368	486.192	970.37	486.192	2	9
1	167.84	57.1	P02760	AMBP_HUMAN	Protein AMBP OS=Homo sapiens GN=AMBP PE=1 SV=1	0	99	EDSCQLGY	Carbamidomethyl(C)@4	cleaved Y-S@C-term	-0.00178649	970.368	486.192	970.37	486.192	2	11
1	167.84	57.1	P02760	AMBP_HUMAN	Protein AMBP OS=Homo sapiens GN=AMBP PE=1 SV=1	0	99	EDSCQLGY	Carbamidomethyl(C)@4	cleaved Y-S@C-term	-0.00178649	970.368	486.192	970.37	486.192	2	9
1	167.84	57.1	P02760	AMBP_HUMAN	Protein AMBP OS=Homo sapiens GN=AMBP PE=1 SV=1	0	99	EDSCQLGY	Carbamidomethyl(C)@4	cleaved Y-S@C-term	-0.00228953	970.368	486.191	970.37	486.192	2	11
1	167.84	57.1	P02760	AMBP_HUMAN	Protein AMBP OS=Homo sapiens GN=AMBP PE=1 SV=1	0	99	EDSCQLGY	Carbamidomethyl(C)@4	cleaved Y-S@C-term	-0.00228953	970.368	486.191	970.37	486.192	2	11
1	167.84	57.1	P02760	AMBP_HUMAN	Protein AMBP OS=Homo sapiens GN=AMBP PE=1 SV=1	0	99	EDSCQLGY	Carbamidomethyl(C)@4	cleaved Y-S@C-term	-0.00228189	970.368	486.191	970.37	486.192	2	11
1	167.84	57.1	P02760	AMBP_HUMAN	Protein AMBP OS=Homo sapiens GN=AMBP PE=1 SV=1	0	99	EDSCQLGY	Carbamidomethyl(C)@4	cleaved Y-S@C-term	-0.00228189	970.368	486.191	970.37	486.192	2	11
1	167.84	57.1	P02760	AMBP_HUMAN	Protein AMBP OS=Homo sapiens GN=AMBP PE=1 SV=1	0	99	EDSCQLGY	Carbamidomethyl(C)@4	cleaved Y-S@C-term	-0.00081796	970.369	486.192	970.37	486.192	2	11
1	167.84	57.1	P02760	AMBP_HUMAN	Protein AMBP OS=Homo sapiens GN=AMBP PE=1 SV=1	0	99	EDSCQLGY	Carbamidomethyl(C)@4	cleaved Y-S@C-term	-0.00081796	970.369	486.192	970.37	486.192	2	11
1	167.84	57.1	P02760	AMBP_HUMAN	Protein AMBP OS=Homo sapiens GN=AMBP PE=1 SV=1	0	99	EDSCQLGY	Carbamidomethyl(C)@4	cleaved Y-S@C-term	-0.00081796	970.369	486.192	970.37	486.192	2	11
1	167.84	57.1	P02760	AMBP_HUMAN	Protein AMBP OS=Homo sapiens GN=AMBP PE=1 SV=1	0	99	EDSCQLGY	Glu->pyro-Glu@N-term; Carbamidomethyl(C)@4	cleaved Y-S@C-term	-0.00350848	952.356	477.185	952.36	477.187	2	10
1	167.84	57.1	P02760	AMBP_HUMAN	Protein AMBP OS=Homo sapiens GN=AMBP PE=1 SV=1	0	99	EDSCQLGY	Carbamidomethyl(C)@4	cleaved Y-S@C-term	-0.000183712	970.37	486.192	970.37	486.192	2	9
1	167.84	57.1	P02760	AMBP_HUMAN	Protein AMBP OS=Homo sapiens GN=AMBP PE=1 SV=1	0	99	EDSCQLGY	Carbamidomethyl(C)@4	cleaved Y-S@C-term	-0.000183712	970.37	486.192	970.37	486.192	2	9
1	167.84	57.1	P02760	AMBP_HUMAN	Protein AMBP OS=Homo sapiens GN=AMBP PE=1 SV=1	0	99	EDSCQLGY	Glu->pyro-Glu@N-term; Carbamidomethyl(C)@4	cleaved Y-S@C-term	0.00217101	952.362	477.188	952.36	477.187	2	9
1	167.84	57.1	P02760	AMBP_HUMAN	Protein AMBP OS=Homo sapiens GN=AMBP PE=1 SV=1	0	99	EDSCQLGY	Carbamidomethyl(C)@4	cleaved Y-S@C-term	-0.000668674	970.369	486.192	970.37	486.192	2	11
1	167.84	57.1	P02760	AMBP_HUMAN	Protein AMBP OS=Homo sapiens GN=AMBP PE=1 SV=1	0	99	EDSCQLGY	Carbamidomethyl(C)@4	cleaved Y-S@C-term	-0.000668674	970.369	486.192	970.37	486.192	2	11
1	167.84	57.1	P02760	AMBP_HUMAN	Protein AMBP OS=Homo sapiens GN=AMBP PE=1 SV=1	0	99	EDSCQLGY	Carbamidomethyl(C)@4	cleaved Y-S@C-term	-0.000912813	970.369	486.192	970.37	486.192	2	10
1	167.84	57.1	P02760	AMBP_HUMAN	Protein AMBP OS=Homo sapiens GN=AMBP PE=1 SV=1	0	99	EDSCQLGY	Carbamidomethyl(C)@4	cleaved Y-S@C-term	-0.00329317	970.367	486.191	970.37	486.192	2	8
1	167.84	57.1	P02760	AMBP_HUMAN	Protein AMBP OS=Homo sapiens GN=AMBP PE=1 SV=1	0	99	EDSCQLGY	Glu->pyro-Glu@N-term; Carbamidomethyl(C)@4	cleaved Y-S@C-term	-0.00123203	952.358	477.187	952.36	477.187	2	10
1	167.84	57.1	P02760	AMBP_HUMAN	Protein AMBP OS=Homo sapiens GN=AMBP PE=1 SV=1	0	99	EDSCQLGY	Carbamidomethyl(C)@4	cleaved Y-S@C-term	-0.000668674	970.369	486.192	970.37	486.192	2	8
1	167.84	57.1	P02760	AMBP_HUMAN	Protein AMBP OS=Homo sapiens GN=AMBP PE=1 SV=1	0	99	EDSCQLGY	Carbamidomethyl(C)@4	cleaved Y-S@C-term	-0.00295823	970.367	486.191	970.37	486.192	2	10
1	167.84	57.1	P02760	AMBP_HUMAN	Protein AMBP OS=Homo sapiens GN=AMBP PE=1 SV=1	0	99	EDSCQLGY	Carbamidomethyl(C)@4	cleaved Y-S@C-term	0.00121884	970.371	486.193	970.37	486.192	2	11
1	167.84	57.1	P02760	AMBP_HUMAN	Protein AMBP OS=Homo sapiens GN=AMBP PE=1 SV=1	0	99	EDSCQLGY	Carbamidomethyl(C)@4	cleaved Y-S@C-term	9.08106e-05	970.37	486.192	970.37	486.192	2	10
1	167.84	57.1	P02760	AMBP_HUMAN	Protein AMBP OS=Homo sapiens GN=AMBP PE=1 SV=1	0	99	EDSCQLGY	Glu->pyro-Glu@N-term; Carbamidomethyl(C)@4	cleaved Y-S@C-term	0.000402512	952.36	477.187	952.36	477.187	2	10
1	167.84	57.1	P02760	AMBP_HUMAN	Protein AMBP OS=Homo sapiens GN=AMBP PE=1 SV=1	0	99	EDSCQLGY	Carbamidomethyl(C)@4	cleaved Y-S@C-term	-0.000551165	970.37	486.192	970.37	486.192	2	11
1	167.84	57.1	P02760	AMBP_HUMAN	Protein AMBP OS=Homo sapiens GN=AMBP PE=1 SV=1	0	99	EDSCQLGY	Carbamidomethyl(C)@4	cleaved Y-S@C-term	-0.00228953	970.368	486.191	970.37	486.192	2	10
1	167.84	57.1	P02760	AMBP_HUMAN	Protein AMBP OS=Homo sapiens GN=AMBP PE=1 SV=1	0	99	EDSCQLGY	Carbamidomethyl(C)@4	cleaved Y-S@C-term	-0.00302702	970.367	486.191	970.37	486.192	2	11
1	167.84	57.1	P02760	AMBP_HUMAN	Protein AMBP OS=Homo sapiens GN=AMBP PE=1 SV=1	0	99	EDSCQLGY	Carbamidomethyl(C)@4	cleaved Y-S@C-term	-0.000430296	970.37	486.192	970.37	486.192	2	11
1	167.84	57.1	P02760	AMBP_HUMAN	Protein AMBP OS=Homo sapiens GN=AMBP PE=1 SV=1	0	99	EDSCQLGY	Carbamidomethyl(C)@4	cleaved Y-S@C-term	-0.00302702	970.367	486.191	970.37	486.192	2	11
1	167.84	57.1	P02760	AMBP_HUMAN	Protein AMBP OS=Homo sapiens GN=AMBP PE=1 SV=1	0	99	EDSCQLGY	Carbamidomethyl(C)@4	cleaved Y-S@C-term	-0.00302702	970.367	486.191	970.37	486.192	2	11
1	167.84	57.1	P02760	AMBP_HUMAN	Protein AMBP OS=Homo sapiens GN=AMBP PE=1 SV=1	0	99	EDSCQLGY	Carbamidomethyl(C)@4	cleaved Y-S@C-term	-0.000430296	970.37	486.192	970.37	486.192	2	11
1	167.84	57.1	P02760	AMBP_HUMAN	Protein AMBP OS=Homo sapiens GN=AMBP PE=1 SV=1	0	99	EDSCQLGY	Carbamidomethyl(C)@4	cleaved Y-S@C-term	-0.000430296	970.37	486.192	970.37	486.192	2	11
1	167.84	57.1	P02760	AMBP_HUMAN	Protein AMBP OS=Homo sapiens GN=AMBP PE=1 SV=1	0	99	EDSCQLGYSAGP	Carbamidomethyl(C)@4	cleaved P-C@C-term	-0.00380952	1282.51	642.262	1282.51	642.264	2	10
1	167.84	57.1	P02760	AMBP_HUMAN	Protein AMBP OS=Homo sapiens GN=AMBP PE=1 SV=1	0	99	EDSCQLGYSAGP	Carbamidomethyl(C)@4	cleaved P-C@C-term	0.000131615	1282.51	642.264	1282.51	642.264	2	14
1	167.84	57.1	P02760	AMBP_HUMAN	Protein AMBP OS=Homo sapiens GN=AMBP PE=1 SV=1	0	99	EDSCQLGYSAGP	Carbamidomethyl(C)@4	cleaved P-C@C-term	0.00096216	1282.51	642.264	1282.51	642.264	2	11
1	167.84	57.1	P02760	AMBP_HUMAN	Protein AMBP OS=Homo sapiens GN=AMBP PE=1 SV=1	0	99	EDSCQLGYSAGP	Carbamidomethyl(C)@4	cleaved P-C@C-term	0.00096216	1282.51	642.264	1282.51	642.264	2	13
1	167.84	57.1	P02760	AMBP_HUMAN	Protein AMBP OS=Homo sapiens GN=AMBP PE=1 SV=1	0	99	EDSCQLGYSAGP	Carbamidomethyl(C)@4; Amidated@C-term	cleaved P-C@C-term	0.000473418	1281.53	641.772	1281.53	641.772	2	12
1	167.84	57.1	P02760	AMBP_HUMAN	Protein AMBP OS=Homo sapiens GN=AMBP PE=1 SV=1	0	99	EDSCQLGYSAGP	Carbamidomethyl(C)@4; Amidated@C-term	cleaved P-C@C-term	-0.00138977	1281.53	641.771	1281.53	641.772	2	12
1	167.84	57.1	P02760	AMBP_HUMAN	Protein AMBP OS=Homo sapiens GN=AMBP PE=1 SV=1	0	99	EDSCQLGYSAGP	Carbamidomethyl(C)@4	cleaved P-C@C-term	-0.00445493	1282.51	642.262	1282.51	642.264	2	14
1	167.84	57.1	P02760	AMBP_HUMAN	Protein AMBP OS=Homo sapiens GN=AMBP PE=1 SV=1	0	99	EDSCQLGYSAGP	Carbamidomethyl(C)@4	cleaved P-C@C-term	-0.004577	1282.51	642.262	1282.51	642.264	2	8
1	167.84	57.1	P02760	AMBP_HUMAN	Protein AMBP OS=Homo sapiens GN=AMBP PE=1 SV=1	0	99	EDSCQLGYSAGP	Carbamidomethyl(C)@4	cleaved P-C@C-term	-0.00100459	1282.51	642.264	1282.51	642.264	2	12
1	167.84	57.1	P02760	AMBP_HUMAN	Protein AMBP OS=Homo sapiens GN=AMBP PE=1 SV=1	0	99	EDSCQLGYSAGP	Carbamidomethyl(C)@4; Amidated@C-term	cleaved P-C@C-term	-0.00826757	1281.52	641.768	1281.53	641.772	2	12
1	167.84	57.1	P02760	AMBP_HUMAN	Protein AMBP OS=Homo sapiens GN=AMBP PE=1 SV=1	0	99	EDSCQLGYSAGP	Carbamidomethyl(C)@4	cleaved P-C@C-term	-0.0057332	1282.51	642.261	1282.51	642.264	2	13
1	167.84	57.1	P02760	AMBP_HUMAN	Protein AMBP OS=Homo sapiens GN=AMBP PE=1 SV=1	0	99	EDSCQLGYSAGPC	Carbamidomethyl(C)@4; Carbamidomethyl(C)@13	cleaved C-M@C-term	0.000794782	1442.55	722.28	1442.54	722.279	2	16
1	167.84	57.1	P02760	AMBP_HUMAN	Protein AMBP OS=Homo sapiens GN=AMBP PE=1 SV=1	0	99	EDSCQLGYSAGPC	Carbamidomethyl(C)@4; Carbamidomethyl(C)@13	cleaved C-M@C-term	-0.00322394	1442.54	722.278	1442.54	722.279	2	15
1	167.84	57.1	P02760	AMBP_HUMAN	Protein AMBP OS=Homo sapiens GN=AMBP PE=1 SV=1	0	99	EDSCQLGYSAGPC	Carbamidomethyl(C)@4; Carbamidomethyl(C)@13	cleaved C-M@C-term	-0.00322394	1442.54	722.278	1442.54	722.279	2	17
1	167.84	57.1	P02760	AMBP_HUMAN	Protein AMBP OS=Homo sapiens GN=AMBP PE=1 SV=1	0	99	EDSCQLGYSAGPC	Carbamidomethyl(C)@4; Carbamidomethyl(C)@13	cleaved C-M@C-term	-0.00647126	1442.54	722.276	1442.54	722.279	2	14
1	167.84	57.1	P02760	AMBP_HUMAN	Protein AMBP OS=Homo sapiens GN=AMBP PE=1 SV=1	0	99	EDSCQLGYSAGPC	Carbamidomethyl(C)@4; Carbamidomethyl(C)@13	cleaved C-M@C-term	-0.00234535	1442.54	722.278	1442.54	722.279	2	16
1	167.84	57.1	P02760	AMBP_HUMAN	Protein AMBP OS=Homo sapiens GN=AMBP PE=1 SV=1	0	99	EDSCQLGYSAGPC	Carbamidomethyl(C)@4; Carbamidomethyl(C)@13	cleaved C-M@C-term	-0.00234535	1442.54	722.278	1442.54	722.279	2	17
1	167.84	57.1	P02760	AMBP_HUMAN	Protein AMBP OS=Homo sapiens GN=AMBP PE=1 SV=1	0	99	EDSCQLGYSAGPC	Carbamidomethyl(C)@4; Carbamidomethyl(C)@13	cleaved C-M@C-term	-0.00365396	1442.54	722.278	1442.54	722.279	2	15
1	167.84	57.1	P02760	AMBP_HUMAN	Protein AMBP OS=Homo sapiens GN=AMBP PE=1 SV=1	0	99	EDSCQLGYSAGPC	Carbamidomethyl(C)@4; Carbamidomethyl(C)@13	cleaved C-M@C-term	-0.00365396	1442.54	722.278	1442.54	722.279	2	18
1	167.84	57.1	P02760	AMBP_HUMAN	Protein AMBP OS=Homo sapiens GN=AMBP PE=1 SV=1	0	99	EDSCQLGYSAGPC	Carbamidomethyl(C)@4; Carbamidomethyl(C)@13	cleaved C-M@C-term	-0.00137649	1442.54	722.279	1442.54	722.279	2	17
1	167.84	57.1	P02760	AMBP_HUMAN	Protein AMBP OS=Homo sapiens GN=AMBP PE=1 SV=1	0	99	EDSCQLGYSAGPC	Carbamidomethyl(C)@4; Carbamidomethyl(C)@13	cleaved C-M@C-term	-0.000150156	1442.54	722.279	1442.54	722.279	2	15
1	167.84	57.1	P02760	AMBP_HUMAN	Protein AMBP OS=Homo sapiens GN=AMBP PE=1 SV=1	0	99	EDSCQLGYSAGPC	Carbamidomethyl(C)@4; Carbamidomethyl(C)@13	cleaved C-M@C-term	-0.000150156	1442.54	722.279	1442.54	722.279	2	17
1	167.84	57.1	P02760	AMBP_HUMAN	Protein AMBP OS=Homo sapiens GN=AMBP PE=1 SV=1	0	99	EDSCQLGYSAGPC	Carbamidomethyl(C)@4; Carbamidomethyl(C)@13	cleaved C-M@C-term	-0.0029192	1442.54	722.278	1442.54	722.279	2	16
1	167.84	57.1	P02760	AMBP_HUMAN	Protein AMBP OS=Homo sapiens GN=AMBP PE=1 SV=1	0	99	EDSCQLGYSAGPC	Carbamidomethyl(C)@4; Carbamidomethyl(C)@13	cleaved C-M@C-term	-0.0029192	1442.54	722.278	1442.54	722.279	2	18
1	167.84	57.1	P02760	AMBP_HUMAN	Protein AMBP OS=Homo sapiens GN=AMBP PE=1 SV=1	0	99	EDSCQLGYSAGPC	Carbamidomethyl(C)@4; Carbamidomethyl(C)@13	cleaved C-M@C-term	-0.00426001	1442.54	722.277	1442.54	722.279	2	16
1	167.84	57.1	P02760	AMBP_HUMAN	Protein AMBP OS=Homo sapiens GN=AMBP PE=1 SV=1	0	99	EDSCQLGYSAGPC	Carbamidomethyl(C)@4; Carbamidomethyl(C)@13	cleaved C-M@C-term	-0.00426001	1442.54	722.277	1442.54	722.279	2	17
1	167.84	57.1	P02760	AMBP_HUMAN	Protein AMBP OS=Homo sapiens GN=AMBP PE=1 SV=1	0	99	EDSCQLGYSAGPC	Carbamidomethyl(C)@4; Carbamidomethyl(C)@13	cleaved C-M@C-term	-0.00135459	1442.54	722.279	1442.54	722.279	2	16
1	167.84	57.1	P02760	AMBP_HUMAN	Protein AMBP OS=Homo sapiens GN=AMBP PE=1 SV=1	0	99	EDSCQLGYSAGPC	Carbamidomethyl(C)@4; Carbamidomethyl(C)@13	cleaved C-M@C-term	-0.00355184	1442.54	722.278	1442.54	722.279	2	17
1	167.84	57.1	P02760	AMBP_HUMAN	Protein AMBP OS=Homo sapiens GN=AMBP PE=1 SV=1	0	99	EDSCQLGYSAGPC	Carbamidomethyl(C)@4; Carbamidomethyl(C)@13	cleaved C-M@C-term	-0.00135242	1442.54	722.279	1442.54	722.279	2	12
1	167.84	57.1	P02760	AMBP_HUMAN	Protein AMBP OS=Homo sapiens GN=AMBP PE=1 SV=1	0	99	EDSCQLGYSAGPC	Carbamidomethyl(C)@4; Carbamidomethyl(C)@13	cleaved C-M@C-term	-0.00135242	1442.54	722.279	1442.54	722.279	2	18
1	167.84	57.1	P02760	AMBP_HUMAN	Protein AMBP OS=Homo sapiens GN=AMBP PE=1 SV=1	0	99	EDSCQLGYSAGPC	Carbamidomethyl(C)@4; Carbamidomethyl(C)@13	cleaved C-M@C-term	-0.00391587	1442.54	722.277	1442.54	722.279	2	13
1	167.84	57.1	P02760	AMBP_HUMAN	Protein AMBP OS=Homo sapiens GN=AMBP PE=1 SV=1	0	99	EDSCQLGYSAGPC	Carbamidomethyl(C)@4; Deamidated(Q)@5; Carbamidomethyl(C)@13	cleaved C-M@C-term	0.000464208	1443.53	722.772	1443.53	722.771	2	12
1	167.84	57.1	P02760	AMBP_HUMAN	Protein AMBP OS=Homo sapiens GN=AMBP PE=1 SV=1	0	99	EDSCQLGYSAGPC	Glu->pyro-Glu@N-term; Carbamidomethyl(C)@4; Carbamidomethyl(C)@13	cleaved C-M@C-term	-0.000292134	1424.53	713.274	1424.53	713.274	2	14
1	167.84	57.1	P02760	AMBP_HUMAN	Protein AMBP OS=Homo sapiens GN=AMBP PE=1 SV=1	0	99	EDSCQLGYSAGPC	Glu->pyro-Glu@N-term; Carbamidomethyl(C)@4; Carbamidomethyl(C)@13	cleaved C-M@C-term	-0.000292134	1424.53	713.274	1424.53	713.274	2	12
1	167.84	57.1	P02760	AMBP_HUMAN	Protein AMBP OS=Homo sapiens GN=AMBP PE=1 SV=1	0	99	EDSCQLGYSAGPC	Carbamidomethyl(C)@4; Carbamidomethyl(C)@13	cleaved C-M@C-term	-0.0026136	1442.54	722.278	1442.54	722.279	2	11
1	167.84	57.1	P02760	AMBP_HUMAN	Protein AMBP OS=Homo sapiens GN=AMBP PE=1 SV=1	0	99	EDSCQLGYSAGPC	Carbamidomethyl(C)@4; Carbamidomethyl(C)@13	cleaved C-M@C-term	-0.00137649	1442.54	722.279	1442.54	722.279	2	16
1	167.84	57.1	P02760	AMBP_HUMAN	Protein AMBP OS=Homo sapiens GN=AMBP PE=1 SV=1	0	99	EDSCQLGYSAGPC	Carbamidomethyl(C)@4; Carbamidomethyl(C)@13	cleaved C-M@C-term	-0.00435428	1442.54	722.277	1442.54	722.279	2	15
1	167.84	57.1	P02760	AMBP_HUMAN	Protein AMBP OS=Homo sapiens GN=AMBP PE=1 SV=1	0	99	EDSCQLGYSAGPC	Carbamidomethyl(C)@4; Carbamidomethyl(C)@13	cleaved C-M@C-term	-0.00423221	1442.54	722.277	1442.54	722.279	2	17
1	167.84	57.1	P02760	AMBP_HUMAN	Protein AMBP OS=Homo sapiens GN=AMBP PE=1 SV=1	0	99	EDSCQLGYSAGPC	Carbamidomethyl(C)@4; Carbamidomethyl(C)@13	cleaved C-M@C-term	0.00345817	1442.55	722.281	1442.54	722.279	2	14
1	167.84	57.1	P02760	AMBP_HUMAN	Protein AMBP OS=Homo sapiens GN=AMBP PE=1 SV=1	0	99	EDSCQLGYSAGPC	Carbamidomethyl(C)@4; Carbamidomethyl(C)@13	cleaved C-M@C-term	0.00452705	1442.55	722.282	1442.54	722.279	2	13
1	167.84	57.1	P02760	AMBP_HUMAN	Protein AMBP OS=Homo sapiens GN=AMBP PE=1 SV=1	0	99	EDSCQLGYSAGPC	Carbamidomethyl(C)@4; Carbamidomethyl(C)@13	cleaved C-M@C-term	-0.00137649	1442.54	722.279	1442.54	722.279	2	15
1	167.84	57.1	P02760	AMBP_HUMAN	Protein AMBP OS=Homo sapiens GN=AMBP PE=1 SV=1	0	99	EDSCQLGYSAGPC	Carbamidomethyl(C)@4; Carbamidomethyl(C)@13	cleaved C-M@C-term	-0.00424527	1442.54	722.277	1442.54	722.279	2	14
1	167.84	57.1	P02760	AMBP_HUMAN	Protein AMBP OS=Homo sapiens GN=AMBP PE=1 SV=1	0	99	EDSCQLGYSAGPC	Carbamidomethyl(C)@4; Carbamidomethyl(C)@13	cleaved C-M@C-term	-0.00424527	1442.54	722.277	1442.54	722.279	2	14
1	167.84	57.1	P02760	AMBP_HUMAN	Protein AMBP OS=Homo sapiens GN=AMBP PE=1 SV=1	0	99	EDSCQLGYSAGPC	Glu->pyro-Glu@N-term; Carbamidomethyl(C)@4; Carbamidomethyl(C)@13	cleaved C-M@C-term	0.000580818	1424.53	713.274	1424.53	713.274	2	15
1	167.84	57.1	P02760	AMBP_HUMAN	Protein AMBP OS=Homo sapiens GN=AMBP PE=1 SV=1	0	99	EDSCQLGYSAGPC	Carbamidomethyl(C)@4; Carbamidomethyl(C)@13	cleaved C-M@C-term	-0.00415212	1442.54	722.277	1442.54	722.279	2	17
1	167.84	57.1	P02760	AMBP_HUMAN	Protein AMBP OS=Homo sapiens GN=AMBP PE=1 SV=1	0	99	EDSCQLGYSAGPCMGM	Carbamidomethyl(C)@4; Carbamidomethyl(C)@13; Oxidation(M)@16	cleaved M-T@C-term	0.00796999	1777.65	889.832	1777.64	889.828	2	13
1	167.84	57.1	P02760	AMBP_HUMAN	Protein AMBP OS=Homo sapiens GN=AMBP PE=1 SV=1	0	99	EDSCQLGYSAGPCMGMTSR	Carbamidomethyl(C)@4; Carbamidomethyl(C)@13; Oxidation(M)@14; Oxidation(M)@16		0.00706735	2137.82	713.615	2137.82	713.613	3	21
1	167.84	57.1	P02760	AMBP_HUMAN	Protein AMBP OS=Homo sapiens GN=AMBP PE=1 SV=1	0	99	EDSCQLGYSAGPCMGMTSR	Carbamidomethyl(C)@4; Carbamidomethyl(C)@13; Oxidation(M)@14; Oxidation(M)@16		0.000841777	2137.82	713.613	2137.82	713.613	3	20
1	167.84	57.1	P02760	AMBP_HUMAN	Protein AMBP OS=Homo sapiens GN=AMBP PE=1 SV=1	0	99	EDSCQLGYSAGPCMGMTSR	Carbamidomethyl(C)@4; Carbamidomethyl(C)@13; Oxidation(M)@14; Oxidation(M)@16		0.000841777	2137.82	713.613	2137.82	713.613	3	20
1	167.84	57.1	P02760	AMBP_HUMAN	Protein AMBP OS=Homo sapiens GN=AMBP PE=1 SV=1	0	99	EDSCQLGYSAGPCMGMTSR	Carbamidomethyl(C)@4; Deamidated(Q)@5; Carbamidomethyl(C)@13; Oxidation(M)@14; Oxidation(M)@16		0.00687595	2138.81	713.943	2138.8	713.941	3	22
1	167.84	57.1	P02760	AMBP_HUMAN	Protein AMBP OS=Homo sapiens GN=AMBP PE=1 SV=1	0	99	EDSCQLGYSAGPCMGMTSR	Carbamidomethyl(C)@4; Carbamidomethyl(C)@13; Oxidation(M)@14; Oxidation(M)@16		0.00102488	2137.82	713.613	2137.82	713.613	3	20
1	167.84	57.1	P02760	AMBP_HUMAN	Protein AMBP OS=Homo sapiens GN=AMBP PE=1 SV=1	0	99	EDSCQLGYSAGPCMGMTSR	Carbamidomethyl(C)@4; Carbamidomethyl(C)@13; Oxidation(M)@14		0.0027999	2121.82	708.282	2121.82	708.281	3	23
1	167.84	57.1	P02760	AMBP_HUMAN	Protein AMBP OS=Homo sapiens GN=AMBP PE=1 SV=1	0	99	EDSCQLGYSAGPCMGMTSR	Carbamidomethyl(C)@4; Carbamidomethyl(C)@13; Oxidation(M)@14		0.00298301	2121.83	708.282	2121.82	708.281	3	22
1	167.84	57.1	P02760	AMBP_HUMAN	Protein AMBP OS=Homo sapiens GN=AMBP PE=1 SV=1	0	99	EDSCQLGYSAGPCMGMTSR	Carbamidomethyl(C)@4; Carbamidomethyl(C)@13; Oxidation(M)@16		0.00334922	2121.83	708.283	2121.82	708.281	3	22
1	167.84	57.1	P02760	AMBP_HUMAN	Protein AMBP OS=Homo sapiens GN=AMBP PE=1 SV=1	0	99	EDSCQLGYSAGPCMGMTSR	Carbamidomethyl(C)@4; Carbamidomethyl(C)@13; Oxidation(M)@16		0.00334922	2121.83	708.283	2121.82	708.281	3	23
1	167.84	57.1	P02760	AMBP_HUMAN	Protein AMBP OS=Homo sapiens GN=AMBP PE=1 SV=1	0	99	EDSCQLGYSAGPCMGMTSR	Carbamidomethyl(C)@4; Carbamidomethyl(C)@13; Oxidation(M)@14		0.00334922	2121.83	708.283	2121.82	708.281	3	22
1	167.84	57.1	P02760	AMBP_HUMAN	Protein AMBP OS=Homo sapiens GN=AMBP PE=1 SV=1	0	99	EDSCQLGYSAGPCMGMTSR	Glu->pyro-Glu@N-term; Carbamidomethyl(C)@4; Carbamidomethyl(C)@13; Oxidation(M)@14; Oxidation(M)@16		0.00356047	2119.81	707.611	2119.81	707.609	3	21
1	167.84	57.1	P02760	AMBP_HUMAN	Protein AMBP OS=Homo sapiens GN=AMBP PE=1 SV=1	0	99	EDSCQLGYSAGPCMGMTSR	Glu->pyro-Glu@N-term; Carbamidomethyl(C)@4; Carbamidomethyl(C)@13; Oxidation(M)@14; Oxidation(M)@16		-0.00156648	2119.81	707.609	2119.81	707.609	3	21
1	167.84	57.1	P02760	AMBP_HUMAN	Protein AMBP OS=Homo sapiens GN=AMBP PE=1 SV=1	0	99	EDSCQLGYSAGPCMGMTSR	Carbamidomethyl(C)@4; Carbamidomethyl(C)@13		0.00439176	2105.83	702.951	2105.83	702.95	3	23
1	167.84	57.1	P02760	AMBP_HUMAN	Protein AMBP OS=Homo sapiens GN=AMBP PE=1 SV=1	0	99	EDSCQLGYSAGPCMGMTSR	Carbamidomethyl(C)@4; Carbamidomethyl(C)@13		0.00439176	2105.83	702.951	2105.83	702.95	3	24
1	167.84	57.1	P02760	AMBP_HUMAN	Protein AMBP OS=Homo sapiens GN=AMBP PE=1 SV=1	0	99	EDSCQLGYSAGPCMGMTSR	Carbamidomethyl(C)@4; Carbamidomethyl(C)@13		0.00439176	2105.83	702.951	2105.83	702.95	3	23
1	167.84	57.1	P02760	AMBP_HUMAN	Protein AMBP OS=Homo sapiens GN=AMBP PE=1 SV=1	0	99	EDSCQLGYSAGPCMGMTSR	Carbamidomethyl(C)@4; Carbamidomethyl(C)@13; Oxidation(M)@14; Oxidation(M)@16; Cation:Na@C-term		0.00647418	2159.81	720.942	2159.8	720.94	3	15
1	167.84	57.1	P02760	AMBP_HUMAN	Protein AMBP OS=Homo sapiens GN=AMBP PE=1 SV=1	0	99	EDSCQLGYSAGPCMGMTSR	Cation:Na(E)@1; Carbamidomethyl(C)@4; Carbamidomethyl(C)@13; Oxidation(M)@14; Oxidation(M)@16		0.00647418	2159.81	720.942	2159.8	720.94	3	12
1	167.84	57.1	P02760	AMBP_HUMAN	Protein AMBP OS=Homo sapiens GN=AMBP PE=1 SV=1	0	99	EDSCQLGYSAGPCMGMTSR	Carbamidomethyl(C)@4; Pro->pyro-Glu(P)@12; Carbamidomethyl(C)@13; Oxidation(M)@14; Oxidation(M)@16		0.0375401	2151.83	718.285	2151.8	718.273	3	15
1	167.84	57.1	P02760	AMBP_HUMAN	Protein AMBP OS=Homo sapiens GN=AMBP PE=1 SV=1	0	99	EDSCQLGYSAGPCMGMTSR	Carbamidomethyl(C)@4; Carbamidomethyl(C)@13; Oxidation(M)@14; Dioxidation(M)@16		0.00765256	2153.82	718.947	2153.81	718.945	3	19
1	167.84	57.1	P02760	AMBP_HUMAN	Protein AMBP OS=Homo sapiens GN=AMBP PE=1 SV=1	0	99	EDSCQLGYSAGPCMGMTSR	Carbamidomethyl(C)@4; Oxidation(P)@12; Carbamidomethyl(C)@13; Oxidation(M)@14; Oxidation(M)@16		0.00765256	2153.82	718.947	2153.81	718.945	3	17
1	167.84	57.1	P02760	AMBP_HUMAN	Protein AMBP OS=Homo sapiens GN=AMBP PE=1 SV=1	0	99	EDSCQLGYSAGPCMGMTSR	Cation:Na(E)@1; Carbamidomethyl(C)@4; Carbamidomethyl(C)@13; Oxidation(M)@14		0.00506016	2143.81	715.61	2143.8	715.609	3	12
1	167.84	57.1	P02760	AMBP_HUMAN	Protein AMBP OS=Homo sapiens GN=AMBP PE=1 SV=1	0	99	EDSCQLGYSAGPCMGMTSR	Glu->pyro-Glu@N-term; Carbamidomethyl(C)@4; Deamidated(Q)@5; Carbamidomethyl(C)@13; Oxidation(M)@14; Oxidation(M)@16		0.0260903	2120.82	707.946	2120.79	707.938	3	15
1	167.84	57.1	P02760	AMBP_HUMAN	Protein AMBP OS=Homo sapiens GN=AMBP PE=1 SV=1	0	99	EDSCQLGYSAGPCMGMTSR	Carbamidomethyl(C)@4; Carbamidomethyl(C)@13; Oxidation(M)@14; Oxidation(M)@16		0.00703334	2137.82	713.615	2137.82	713.613	3	17
1	167.84	57.1	P02760	AMBP_HUMAN	Protein AMBP OS=Homo sapiens GN=AMBP PE=1 SV=1	0	99	EDSCQLGYSAGPCMGMTSR	Carbamidomethyl(C)@4; Carbamidomethyl(C)@13; Oxidation(M)@14; Oxidation(M)@16		0.00703334	2137.82	713.615	2137.82	713.613	3	23
1	167.84	57.1	P02760	AMBP_HUMAN	Protein AMBP OS=Homo sapiens GN=AMBP PE=1 SV=1	0	99	EDSCQLGYSAGPCMGMTSR	Carbamidomethyl(C)@4; Carbamidomethyl(C)@13; Oxidation(M)@14; Oxidation(M)@16		0.00703334	2137.82	713.615	2137.82	713.613	3	21
1	167.84	57.1	P02760	AMBP_HUMAN	Protein AMBP OS=Homo sapiens GN=AMBP PE=1 SV=1	0	99	EDSCQLGYSAGPCMGMTSR	Carbamidomethyl(C)@4; Carbamidomethyl(C)@13; Oxidation(M)@14; Oxidation(M)@16		0.00120159	2137.82	1069.92	2137.82	1069.92	2	20
1	167.84	57.1	P02760	AMBP_HUMAN	Protein AMBP OS=Homo sapiens GN=AMBP PE=1 SV=1	0	99	EDSCQLGYSAGPCMGMTSR	Carbamidomethyl(C)@4; Carbamidomethyl(C)@13; Oxidation(M)@14; Oxidation(M)@16		0.00703334	2137.82	713.615	2137.82	713.613	3	20
1	167.84	57.1	P02760	AMBP_HUMAN	Protein AMBP OS=Homo sapiens GN=AMBP PE=1 SV=1	0	99	EDSCQLGYSAGPCMGMTSR	Carbamidomethyl(C)@4; Carbamidomethyl(C)@13; Oxidation(M)@14; Oxidation(M)@16		0.00703334	2137.82	713.615	2137.82	713.613	3	20
1	167.84	57.1	P02760	AMBP_HUMAN	Protein AMBP OS=Homo sapiens GN=AMBP PE=1 SV=1	0	99	EDSCQLGYSAGPCMGMTSR	Carbamidomethyl(C)@4; Carbamidomethyl(C)@13; Oxidation(M)@14; Oxidation(M)@16		0.0052023	2137.82	713.615	2137.82	713.613	3	21
1	167.84	57.1	P02760	AMBP_HUMAN	Protein AMBP OS=Homo sapiens GN=AMBP PE=1 SV=1	0	99	EDSCQLGYSAGPCMGMTSR	Carbamidomethyl(C)@4; Carbamidomethyl(C)@13; Oxidation(M)@14; Oxidation(M)@16		0.0052023	2137.82	713.615	2137.82	713.613	3	22
1	167.84	57.1	P02760	AMBP_HUMAN	Protein AMBP OS=Homo sapiens GN=AMBP PE=1 SV=1	0	99	EDSCQLGYSAGPCMGMTSR	Carbamidomethyl(C)@4; Deamidated(Q)@5; Carbamidomethyl(C)@13; Oxidation(M)@14; Oxidation(M)@16		0.00189205	2138.8	713.942	2138.8	713.941	3	21
1	167.84	57.1	P02760	AMBP_HUMAN	Protein AMBP OS=Homo sapiens GN=AMBP PE=1 SV=1	0	99	EDSCQLGYSAGPCMGMTSR	Carbamidomethyl(C)@4; Deamidated(Q)@5; Carbamidomethyl(C)@13; Oxidation(M)@14; Oxidation(M)@16		0.00189205	2138.8	713.942	2138.8	713.941	3	19
1	167.84	57.1	P02760	AMBP_HUMAN	Protein AMBP OS=Homo sapiens GN=AMBP PE=1 SV=1	0	99	EDSCQLGYSAGPCMGMTSR	Carbamidomethyl(C)@4; Deamidated(Q)@5; Carbamidomethyl(C)@13; Oxidation(M)@14; Oxidation(M)@16		0.00189205	2138.8	713.942	2138.8	713.941	3	17
1	167.84	57.1	P02760	AMBP_HUMAN	Protein AMBP OS=Homo sapiens GN=AMBP PE=1 SV=1	0	99	EDSCQLGYSAGPCMGMTSR	Carbamidomethyl(C)@4; Carbamidomethyl(C)@13; Oxidation(M)@14; Oxidation(M)@16		-0.00285428	2137.81	713.612	2137.82	713.613	3	21
1	167.84	57.1	P02760	AMBP_HUMAN	Protein AMBP OS=Homo sapiens GN=AMBP PE=1 SV=1	0	99	EDSCQLGYSAGPCMGMTSR	Carbamidomethyl(C)@4; Deamidated(Q)@5; Carbamidomethyl(C)@13; Oxidation(M)@14; Oxidation(M)@16		0.0139769	2138.82	713.946	2138.8	713.941	3	16
1	167.84	57.1	P02760	AMBP_HUMAN	Protein AMBP OS=Homo sapiens GN=AMBP PE=1 SV=1	0	99	EDSCQLGYSAGPCMGMTSR	Carbamidomethyl(C)@4; Carbamidomethyl(C)@13; Oxidation(M)@14; Oxidation(M)@16		0.0052023	2137.82	713.615	2137.82	713.613	3	18
1	167.84	57.1	P02760	AMBP_HUMAN	Protein AMBP OS=Homo sapiens GN=AMBP PE=1 SV=1	0	99	EDSCQLGYSAGPCMGMTSR	Carbamidomethyl(C)@4; Carbamidomethyl(C)@13; Oxidation(M)@14; Oxidation(M)@16		0.0052023	2137.82	713.615	2137.82	713.613	3	18
1	167.84	57.1	P02760	AMBP_HUMAN	Protein AMBP OS=Homo sapiens GN=AMBP PE=1 SV=1	0	99	EDSCQLGYSAGPCMGMTSR	Carbamidomethyl(C)@4; Carbamidomethyl(C)@13; Oxidation(M)@14; Oxidation(M)@16		0.0052023	2137.82	713.615	2137.82	713.613	3	20
1	167.84	57.1	P02760	AMBP_HUMAN	Protein AMBP OS=Homo sapiens GN=AMBP PE=1 SV=1	0	99	EDSCQLGYSAGPCMGMTSR	Carbamidomethyl(C)@4; Carbamidomethyl(C)@13; Oxidation(M)@14; Oxidation(M)@16		-0.00267118	2137.81	713.612	2137.82	713.613	3	20
1	167.84	57.1	P02760	AMBP_HUMAN	Protein AMBP OS=Homo sapiens GN=AMBP PE=1 SV=1	0	99	EDSCQLGYSAGPCMGMTSR	Carbamidomethyl(C)@4; Carbamidomethyl(C)@13; Oxidation(M)@14; Oxidation(M)@16		0.00154021	2137.82	713.614	2137.82	713.613	3	19
1	167.84	57.1	P02760	AMBP_HUMAN	Protein AMBP OS=Homo sapiens GN=AMBP PE=1 SV=1	0	99	EDSCQLGYSAGPCMGMTSR	Carbamidomethyl(C)@4; Carbamidomethyl(C)@13; Oxidation(M)@14; Oxidation(M)@16		-0.00413601	2137.81	713.612	2137.82	713.613	3	21
1	167.84	57.1	P02760	AMBP_HUMAN	Protein AMBP OS=Homo sapiens GN=AMBP PE=1 SV=1	0	99	EDSCQLGYSAGPCMGMTSR	Carbamidomethyl(C)@4; Carbamidomethyl(C)@13; Oxidation(M)@14; Oxidation(M)@16		-0.00413601	2137.81	713.612	2137.82	713.613	3	20
1	167.84	57.1	P02760	AMBP_HUMAN	Protein AMBP OS=Homo sapiens GN=AMBP PE=1 SV=1	0	99	EDSCQLGYSAGPCMGMTSR	Carbamidomethyl(C)@4; Carbamidomethyl(C)@13; Oxidation(M)@14; Oxidation(M)@16		0.00154021	2137.82	713.614	2137.82	713.613	3	19
1	167.84	57.1	P02760	AMBP_HUMAN	Protein AMBP OS=Homo sapiens GN=AMBP PE=1 SV=1	0	99	EDSCQLGYSAGPCMGMTSR	Carbamidomethyl(C)@4; Carbamidomethyl(C)@13; Oxidation(M)@14		0.00359692	2121.83	708.283	2121.82	708.281	3	21
1	167.84	57.1	P02760	AMBP_HUMAN	Protein AMBP OS=Homo sapiens GN=AMBP PE=1 SV=1	0	99	EDSCQLGYSAGPCMGMTSR	Carbamidomethyl(C)@4; Carbamidomethyl(C)@13; Oxidation(M)@14; Oxidation(M)@16		0.0182027	2137.84	713.619	2137.82	713.613	3	20
1	167.84	57.1	P02760	AMBP_HUMAN	Protein AMBP OS=Homo sapiens GN=AMBP PE=1 SV=1	0	99	EDSCQLGYSAGPCMGMTSR	Carbamidomethyl(C)@4; Carbamidomethyl(C)@13; Oxidation(M)@14		-0.00251948	2121.82	1061.92	2121.82	1061.92	2	22
1	167.84	57.1	P02760	AMBP_HUMAN	Protein AMBP OS=Homo sapiens GN=AMBP PE=1 SV=1	0	99	EDSCQLGYSAGPCMGMTSR	Carbamidomethyl(C)@4; Carbamidomethyl(C)@13; Oxidation(M)@14		0.00341381	2121.83	708.283	2121.82	708.281	3	22
1	167.84	57.1	P02760	AMBP_HUMAN	Protein AMBP OS=Homo sapiens GN=AMBP PE=1 SV=1	0	99	EDSCQLGYSAGPCMGMTSR	Carbamidomethyl(C)@4; Carbamidomethyl(C)@13; Oxidation(M)@16		-0.00251948	2121.82	1061.92	2121.82	1061.92	2	19
1	167.84	57.1	P02760	AMBP_HUMAN	Protein AMBP OS=Homo sapiens GN=AMBP PE=1 SV=1	0	99	EDSCQLGYSAGPCMGMTSR	Carbamidomethyl(C)@4; Carbamidomethyl(C)@13; Oxidation(M)@16		0.00359692	2121.83	708.283	2121.82	708.281	3	22
1	167.84	57.1	P02760	AMBP_HUMAN	Protein AMBP OS=Homo sapiens GN=AMBP PE=1 SV=1	0	99	EDSCQLGYSAGPCMGMTSR	Carbamidomethyl(C)@4; Carbamidomethyl(C)@13; Oxidation(M)@14		-0.0017131	2121.82	708.281	2121.82	708.281	3	21
1	167.84	57.1	P02760	AMBP_HUMAN	Protein AMBP OS=Homo sapiens GN=AMBP PE=1 SV=1	0	99	EDSCQLGYSAGPCMGMTSR	Glu->pyro-Glu@N-term; Carbamidomethyl(C)@4; Carbamidomethyl(C)@13; Oxidation(M)@14; Oxidation(M)@16		0.00363746	2119.81	707.611	2119.81	707.609	3	21
1	167.84	57.1	P02760	AMBP_HUMAN	Protein AMBP OS=Homo sapiens GN=AMBP PE=1 SV=1	0	99	EDSCQLGYSAGPCMGMTSR	Carbamidomethyl(C)@4; Carbamidomethyl(C)@13; Oxidation(M)@16		-0.0130656	2121.81	708.277	2121.82	708.281	3	16
1	167.84	57.1	P02760	AMBP_HUMAN	Protein AMBP OS=Homo sapiens GN=AMBP PE=1 SV=1	0	99	EDSCQLGYSAGPCMGMTSR	Glu->pyro-Glu@N-term; Carbamidomethyl(C)@4; Carbamidomethyl(C)@13; Oxidation(M)@14; Oxidation(M)@16		0.00363746	2119.81	707.611	2119.81	707.609	3	21
1	167.84	57.1	P02760	AMBP_HUMAN	Protein AMBP OS=Homo sapiens GN=AMBP PE=1 SV=1	0	99	EDSCQLGYSAGPCMGMTSR	Glu->pyro-Glu@N-term; Carbamidomethyl(C)@4; Carbamidomethyl(C)@13; Oxidation(M)@14; Oxidation(M)@16		0.00363746	2119.81	707.611	2119.81	707.609	3	20
1	167.84	57.1	P02760	AMBP_HUMAN	Protein AMBP OS=Homo sapiens GN=AMBP PE=1 SV=1	0	99	EDSCQLGYSAGPCMGMTSR	Glu->pyro-Glu@N-term; Carbamidomethyl(C)@4; Carbamidomethyl(C)@13; Oxidation(M)@14; Oxidation(M)@16		0.00363746	2119.81	707.611	2119.81	707.609	3	20
1	167.84	57.1	P02760	AMBP_HUMAN	Protein AMBP OS=Homo sapiens GN=AMBP PE=1 SV=1	0	99	EDSCQLGYSAGPCMGMTSR	Glu->pyro-Glu@N-term; Carbamidomethyl(C)@4; Carbamidomethyl(C)@13; Oxidation(M)@14; Oxidation(M)@16		0.00363746	2119.81	707.611	2119.81	707.609	3	20
1	167.84	57.1	P02760	AMBP_HUMAN	Protein AMBP OS=Homo sapiens GN=AMBP PE=1 SV=1	0	99	EDSCQLGYSAGPCMGMTSR	Glu->pyro-Glu@N-term; Carbamidomethyl(C)@4; Carbamidomethyl(C)@13; Oxidation(M)@14; Oxidation(M)@16		0.00363746	2119.81	707.611	2119.81	707.609	3	18
1	167.84	57.1	P02760	AMBP_HUMAN	Protein AMBP OS=Homo sapiens GN=AMBP PE=1 SV=1	0	99	EDSCQLGYSAGPCMGMTSR	Carbamidomethyl(C)@4; Carbamidomethyl(C)@13; Oxidation(M)@16		-0.0130656	2121.81	708.277	2121.82	708.281	3	20
1	167.84	57.1	P02760	AMBP_HUMAN	Protein AMBP OS=Homo sapiens GN=AMBP PE=1 SV=1	0	99	EDSCQLGYSAGPCMGMTSR	Glu->pyro-Glu@N-term; Carbamidomethyl(C)@4; Carbamidomethyl(C)@13; Oxidation(M)@14; Oxidation(M)@16		0.00272194	2119.81	707.61	2119.81	707.609	3	18
1	167.84	57.1	P02760	AMBP_HUMAN	Protein AMBP OS=Homo sapiens GN=AMBP PE=1 SV=1	0	99	EDSCQLGYSAGPCMGMTSR	Carbamidomethyl(C)@4; Carbamidomethyl(C)@13; Oxidation(M)@16		-0.00262862	2121.82	708.28	2121.82	708.281	3	21
1	167.84	57.1	P02760	AMBP_HUMAN	Protein AMBP OS=Homo sapiens GN=AMBP PE=1 SV=1	0	99	EDSCQLGYSAGPCMGMTSR	Carbamidomethyl(C)@4; Carbamidomethyl(C)@13; Oxidation(M)@16		-0.00720622	2121.82	708.279	2121.82	708.281	3	18
1	167.84	57.1	P02760	AMBP_HUMAN	Protein AMBP OS=Homo sapiens GN=AMBP PE=1 SV=1	0	99	EDSCQLGYSAGPCMGMTSR	Carbamidomethyl(C)@4; Carbamidomethyl(C)@13; Oxidation(M)@16		-0.00720622	2121.82	708.279	2121.82	708.281	3	16
1	167.84	57.1	P02760	AMBP_HUMAN	Protein AMBP OS=Homo sapiens GN=AMBP PE=1 SV=1	0	99	EDSCQLGYSAGPCMGMTSR	Carbamidomethyl(C)@4; Carbamidomethyl(C)@13; Oxidation(M)@16		0.00359692	2121.83	708.283	2121.82	708.281	3	18
1	167.84	57.1	P02760	AMBP_HUMAN	Protein AMBP OS=Homo sapiens GN=AMBP PE=1 SV=1	0	99	EDSCQLGYSAGPCMGMTSR	Carbamidomethyl(C)@4; Carbamidomethyl(C)@13; Oxidation(M)@16		0.0030476	2121.83	708.282	2121.82	708.281	3	18
1	167.84	57.1	P02760	AMBP_HUMAN	Protein AMBP OS=Homo sapiens GN=AMBP PE=1 SV=1	0	99	EDSCQLGYSAGPCMGMTSR	Carbamidomethyl(C)@4; Carbamidomethyl(C)@13; Oxidation(M)@14		0.0030476	2121.83	708.282	2121.82	708.281	3	20
1	167.84	57.1	P02760	AMBP_HUMAN	Protein AMBP OS=Homo sapiens GN=AMBP PE=1 SV=1	0	99	EDSCQLGYSAGPCMGMTSR	Carbamidomethyl(C)@4; Carbamidomethyl(C)@13; Oxidation(M)@14		0.0030476	2121.83	708.282	2121.82	708.281	3	20
1	167.84	57.1	P02760	AMBP_HUMAN	Protein AMBP OS=Homo sapiens GN=AMBP PE=1 SV=1	0	99	EDSCQLGYSAGPCMGMTSR	Carbamidomethyl(C)@4; Carbamidomethyl(C)@13; Oxidation(M)@16		-0.00207931	2121.82	708.281	2121.82	708.281	3	19
1	167.84	57.1	P02760	AMBP_HUMAN	Protein AMBP OS=Homo sapiens GN=AMBP PE=1 SV=1	0	99	EDSCQLGYSAGPCMGMTSR	Carbamidomethyl(C)@4; Carbamidomethyl(C)@13		0.00363905	2105.83	702.951	2105.83	702.95	3	24
1	167.84	57.1	P02760	AMBP_HUMAN	Protein AMBP OS=Homo sapiens GN=AMBP PE=1 SV=1	0	99	EDSCQLGYSAGPCMGMTSR	Carbamidomethyl(C)@4; Carbamidomethyl(C)@13; Oxidation(M)@14		0.0030476	2121.83	708.282	2121.82	708.281	3	22
1	167.84	57.1	P02760	AMBP_HUMAN	Protein AMBP OS=Homo sapiens GN=AMBP PE=1 SV=1	0	99	EDSCQLGYSAGPCMGMTSR	Carbamidomethyl(C)@4; Carbamidomethyl(C)@13		-0.00550848	2105.82	1053.92	2105.83	1053.92	2	20
1	167.84	57.1	P02760	AMBP_HUMAN	Protein AMBP OS=Homo sapiens GN=AMBP PE=1 SV=1	0	99	EDSCQLGYSAGPCMGMTSR	Carbamidomethyl(C)@4; Carbamidomethyl(C)@13		0.00363905	2105.83	702.951	2105.83	702.95	3	23
1	167.84	57.1	P02760	AMBP_HUMAN	Protein AMBP OS=Homo sapiens GN=AMBP PE=1 SV=1	0	99	EDSCQLGYSAGPCMGMTSR	Carbamidomethyl(C)@4; Carbamidomethyl(C)@13		0.00382216	2105.83	702.951	2105.83	702.95	3	23
1	167.84	57.1	P02760	AMBP_HUMAN	Protein AMBP OS=Homo sapiens GN=AMBP PE=1 SV=1	0	99	EDSCQLGYSAGPCMGMTSR	Glu->pyro-Glu@N-term; Carbamidomethyl(C)@4; Carbamidomethyl(C)@13; Oxidation(M)@14		-0.000714958	2103.81	702.278	2103.81	702.278	3	22
1	167.84	57.1	P02760	AMBP_HUMAN	Protein AMBP OS=Homo sapiens GN=AMBP PE=1 SV=1	0	99	EDSCQLGYSAGPCMGMTSR	Glu->pyro-Glu@N-term; Carbamidomethyl(C)@4; Carbamidomethyl(C)@13; Oxidation(M)@14		-0.000714958	2103.81	702.278	2103.81	702.278	3	22
1	167.84	57.1	P02760	AMBP_HUMAN	Protein AMBP OS=Homo sapiens GN=AMBP PE=1 SV=1	0	99	EDSCQLGYSAGPCMGMTSR	Glu->pyro-Glu@N-term; Carbamidomethyl(C)@4; Carbamidomethyl(C)@13; Oxidation(M)@16		1.74582e-05	2103.81	702.278	2103.81	702.278	3	16
1	167.84	57.1	P02760	AMBP_HUMAN	Protein AMBP OS=Homo sapiens GN=AMBP PE=1 SV=1	0	99	EDSCQLGYSAGPCMGMTSR	Glu->pyro-Glu@N-term; Carbamidomethyl(C)@4; Carbamidomethyl(C)@13; Oxidation(M)@16		1.74582e-05	2103.81	702.278	2103.81	702.278	3	22
1	167.84	57.1	P02760	AMBP_HUMAN	Protein AMBP OS=Homo sapiens GN=AMBP PE=1 SV=1	0	99	EDSCQLGYSAGPCMGMTSR	Glu->pyro-Glu@N-term; Carbamidomethyl(C)@4; Carbamidomethyl(C)@13		0.00591844	2087.82	696.948	2087.82	696.946	3	22
1	167.84	57.1	P02760	AMBP_HUMAN	Protein AMBP OS=Homo sapiens GN=AMBP PE=1 SV=1	0	99	EDSCQLGYSAGPCMGMTSR	Glu->pyro-Glu@N-term; Carbamidomethyl(C)@4; Carbamidomethyl(C)@13		0.00591844	2087.82	696.948	2087.82	696.946	3	21
1	167.84	57.1	P02760	AMBP_HUMAN	Protein AMBP OS=Homo sapiens GN=AMBP PE=1 SV=1	0	99	EDSCQLGYSAGPCMGMTSR	Glu->pyro-Glu@N-term; No Carbamidomethyl(C)@4; Carbamidomethyl(C)@13; Oxidation(M)@14; Oxidation(M)@16		0.0262036	2062.81	688.611	2062.79	688.602	3	16
1	167.84	57.1	P02760	AMBP_HUMAN	Protein AMBP OS=Homo sapiens GN=AMBP PE=1 SV=1	0	99	EDSCQLGYSAGPCMGMTSR	Propionamide@N-term; Carbamidomethyl(C)@4; Carbamidomethyl(C)@13; Oxidation(M)@16		0.0469736	2192.91	731.976	2192.86	731.96	3	13
1	167.84	57.1	P02760	AMBP_HUMAN	Protein AMBP OS=Homo sapiens GN=AMBP PE=1 SV=1	0	99	EDSCQLGYSAGPCMGMTSR	Glu->pyro-Glu@N-term; No Carbamidomethyl(C)@4; Carbamidomethyl(C)@13; Oxidation(M)@14; Oxidation(M)@16		0.0225415	2062.81	688.61	2062.79	688.602	3	17
1	167.84	57.1	P02760	AMBP_HUMAN	Protein AMBP OS=Homo sapiens GN=AMBP PE=1 SV=1	0	99	EDSCQLGYSAGPCMGMTSR	Carbamidomethyl(C)@4; Carbamidomethyl(C)@13; Oxidation(M)@14; Oxidation(M)@16		0.00944031	2137.83	713.616	2137.82	713.613	3	21
1	167.84	57.1	P02760	AMBP_HUMAN	Protein AMBP OS=Homo sapiens GN=AMBP PE=1 SV=1	0	99	EDSCQLGYSAGPCMGMTSR	Cation:Na(E)@1; Carbamidomethyl(C)@4; Carbamidomethyl(C)@13; Oxidation(M)@14; Oxidation(M)@16		-0.000669301	2159.8	720.94	2159.8	720.94	3	12
1	167.84	57.1	P02760	AMBP_HUMAN	Protein AMBP OS=Homo sapiens GN=AMBP PE=1 SV=1	0	99	EDSCQLGYSAGPCMGMTSR	Carbamidomethyl(C)@4; Carbamidomethyl(C)@13; Oxidation(M)@14; Oxidation(M)@16		-0.00284215	2137.82	1069.91	2137.82	1069.92	2	20
1	167.84	57.1	P02760	AMBP_HUMAN	Protein AMBP OS=Homo sapiens GN=AMBP PE=1 SV=1	0	99	EDSCQLGYSAGPCMGMTSR	Cation:Na(E)@1; Carbamidomethyl(C)@4; Carbamidomethyl(C)@13; Oxidation(M)@14; Oxidation(M)@16		-0.000669301	2159.8	720.94	2159.8	720.94	3	13
1	167.84	57.1	P02760	AMBP_HUMAN	Protein AMBP OS=Homo sapiens GN=AMBP PE=1 SV=1	0	99	EDSCQLGYSAGPCMGMTSR	Carbamidomethyl(C)@4; Deamidated(Q)@5; Carbamidomethyl(C)@13; Oxidation(M)@14; Oxidation(M)@16		0.0211483	2138.82	713.948	2138.8	713.941	3	17
1	167.84	57.1	P02760	AMBP_HUMAN	Protein AMBP OS=Homo sapiens GN=AMBP PE=1 SV=1	0	99	EDSCQLGYSAGPCMGMTSR	Carbamidomethyl(C)@4; Pro->pyro-Glu(P)@12; Carbamidomethyl(C)@13; Oxidation(M)@14; Oxidation(M)@16		0.041899	2151.84	718.287	2151.8	718.273	3	15
1	167.84	57.1	P02760	AMBP_HUMAN	Protein AMBP OS=Homo sapiens GN=AMBP PE=1 SV=1	0	99	EDSCQLGYSAGPCMGMTSR	Carbamidomethyl(C)@4; Carbamidomethyl(C)@13; Oxidation(M)@14; Oxidation(M)@16		0.00577822	2137.82	713.615	2137.82	713.613	3	22
1	167.84	57.1	P02760	AMBP_HUMAN	Protein AMBP OS=Homo sapiens GN=AMBP PE=1 SV=1	0	99	EDSCQLGYSAGPCMGMTSR	Carbamidomethyl(C)@4; Carbamidomethyl(C)@13; Oxidation(M)@14; Oxidation(M)@16		0.00577822	2137.82	713.615	2137.82	713.613	3	18
1	167.84	57.1	P02760	AMBP_HUMAN	Protein AMBP OS=Homo sapiens GN=AMBP PE=1 SV=1	0	99	EDSCQLGYSAGPCMGMTSR	Carbamidomethyl(C)@4; Pro->pyro-Glu(P)@12; Carbamidomethyl(C)@13; Oxidation(M)@14; Oxidation(M)@16		0.041899	2151.84	718.287	2151.8	718.273	3	14
1	167.84	57.1	P02760	AMBP_HUMAN	Protein AMBP OS=Homo sapiens GN=AMBP PE=1 SV=1	0	99	EDSCQLGYSAGPCMGMTSR	Carbamidomethyl(C)@4; Carbamidomethyl(C)@13; Oxidation(M)@14; Oxidation(M)@16		-0.000447342	2137.82	713.613	2137.82	713.613	3	22
1	167.84	57.1	P02760	AMBP_HUMAN	Protein AMBP OS=Homo sapiens GN=AMBP PE=1 SV=1	0	99	EDSCQLGYSAGPCMGMTSR	Carbamidomethyl(C)@4; Carbamidomethyl(C)@13; Oxidation(M)@14; Oxidation(M)@16		-0.000447342	2137.82	713.613	2137.82	713.613	3	21
1	167.84	57.1	P02760	AMBP_HUMAN	Protein AMBP OS=Homo sapiens GN=AMBP PE=1 SV=1	0	99	EDSCQLGYSAGPCMGMTSR	Carbamidomethyl(C)@4; Deamidated(Q)@5; Carbamidomethyl(C)@13; Oxidation(M)@14; Oxidation(M)@16		-0.000824304	2138.8	713.941	2138.8	713.941	3	23
1	167.84	57.1	P02760	AMBP_HUMAN	Protein AMBP OS=Homo sapiens GN=AMBP PE=1 SV=1	0	99	EDSCQLGYSAGPCMGMTSR	Carbamidomethyl(C)@4; Carbamidomethyl(C)@13; Carbamyl(M)@14; Oxidation(M)@16		-0.00358205	2164.82	722.615	2164.83	722.617	3	16
1	167.84	57.1	P02760	AMBP_HUMAN	Protein AMBP OS=Homo sapiens GN=AMBP PE=1 SV=1	0	99	EDSCQLGYSAGPCMGMTSR	Carbamidomethyl(C)@4; Carbamidomethyl(C)@13; Oxidation(M)@14; Dioxidation(M)@16		0.00561104	2153.82	718.947	2153.81	718.945	3	20
1	167.84	57.1	P02760	AMBP_HUMAN	Protein AMBP OS=Homo sapiens GN=AMBP PE=1 SV=1	0	99	EDSCQLGYSAGPCMGMTSR	Carbamidomethyl(C)@4; Pro->pyro-Glu(P)@12; Carbamidomethyl(C)@13; Oxidation(M)@14; Dioxidation(M)@16		0.0393512	2167.83	723.618	2167.79	723.604	3	14
1	167.84	57.1	P02760	AMBP_HUMAN	Protein AMBP OS=Homo sapiens GN=AMBP PE=1 SV=1	0	99	EDSCQLGYSAGPCMGMTSR	Carbamidomethyl(C)@4; Amino(Y)@8; Carbamidomethyl(C)@13; Oxidation(M)@14; Oxidation(M)@16		-0.00335032	2152.82	718.615	2152.83	718.617	3	17
1	167.84	57.1	P02760	AMBP_HUMAN	Protein AMBP OS=Homo sapiens GN=AMBP PE=1 SV=1	0	99	EDSCQLGYSAGPCMGMTSR	Carbamidomethyl(C)@4; Carbamidomethyl(C)@13; Oxidation(M)@14; Oxidation(M)@16		0.0048627	2137.82	713.615	2137.82	713.613	3	20
1	167.84	57.1	P02760	AMBP_HUMAN	Protein AMBP OS=Homo sapiens GN=AMBP PE=1 SV=1	0	99	EDSCQLGYSAGPCMGMTSR	Carbamidomethyl(C)@4; Carbamidomethyl(C)@13; Oxidation(M)@14; Oxidation(M)@16		-0.000996656	2137.82	713.613	2137.82	713.613	3	20
1	167.84	57.1	P02760	AMBP_HUMAN	Protein AMBP OS=Homo sapiens GN=AMBP PE=1 SV=1	0	99	EDSCQLGYSAGPCMGMTSR	Carbamidomethyl(C)@4; Carbamidomethyl(C)@13; Oxidation(M)@14; Oxidation(M)@16		0.00467959	2137.82	713.615	2137.82	713.613	3	18
1	167.84	57.1	P02760	AMBP_HUMAN	Protein AMBP OS=Homo sapiens GN=AMBP PE=1 SV=1	0	99	EDSCQLGYSAGPCMGMTSR	Carbamidomethyl(C)@4; Pro->pyro-Glu(P)@12; Carbamidomethyl(C)@13; Oxidation(M)@14; Oxidation(M)@16		0.0424483	2151.84	718.287	2151.8	718.273	3	13
1	167.84	57.1	P02760	AMBP_HUMAN	Protein AMBP OS=Homo sapiens GN=AMBP PE=1 SV=1	0	99	EDSCQLGYSAGPCMGMTSR	Carbamidomethyl(C)@4; Deamidated(Q)@5; Carbamidomethyl(C)@13; Oxidation(M)@14; Dioxidation(M)@16		0.0206149	2154.82	719.279	2154.8	719.273	3	16
1	167.84	57.1	P02760	AMBP_HUMAN	Protein AMBP OS=Homo sapiens GN=AMBP PE=1 SV=1	0	99	EDSCQLGYSAGPCMGMTSR	Carbamidomethyl(C)@4; Carbamidomethyl(C)@13; Oxidation(M)@14; Oxidation(M)@16		0.00321475	2137.82	713.614	2137.82	713.613	3	19
1	167.84	57.1	P02760	AMBP_HUMAN	Protein AMBP OS=Homo sapiens GN=AMBP PE=1 SV=1	0	99	EDSCQLGYSAGPCMGMTSR	Carbamidomethyl(C)@4; Carbamidomethyl(C)@13; Oxidation(M)@16; Dehydrated(T)@17; Arg->GluSA(R)@19		0.0112861	2060.77	687.931	2060.76	687.927	3	15
1	167.84	57.1	P02760	AMBP_HUMAN	Protein AMBP OS=Homo sapiens GN=AMBP PE=1 SV=1	0	99	EDSCQLGYSAGPCMGMTSR	Carbamidomethyl(C)@4; Amino(Y)@8; Carbamidomethyl(C)@13; Oxidation(M)@14; Oxidation(M)@16		-0.00902657	2152.82	718.614	2152.83	718.617	3	15
1	167.84	57.1	P02760	AMBP_HUMAN	Protein AMBP OS=Homo sapiens GN=AMBP PE=1 SV=1	0	99	EDSCQLGYSAGPCMGMTSR	Carbamidomethyl(C)@4; Carbamidomethyl(C)@13; Oxidation(M)@14; Oxidation(M)@16		0.000101973	2137.82	713.613	2137.82	713.613	3	18
1	167.84	57.1	P02760	AMBP_HUMAN	Protein AMBP OS=Homo sapiens GN=AMBP PE=1 SV=1	0	99	EDSCQLGYSAGPCMGMTSR	Carbamidomethyl(C)@4; Carbamidomethyl(C)@13; Oxidation(M)@14; Oxidation(M)@16		0.000101973	2137.82	713.613	2137.82	713.613	3	19
1	167.84	57.1	P02760	AMBP_HUMAN	Protein AMBP OS=Homo sapiens GN=AMBP PE=1 SV=1	0	99	EDSCQLGYSAGPCMGMTSR	Carbamidomethyl(C)@4; Carbamidomethyl(C)@13; Oxidation(M)@14; Oxidation(M)@16		0.00467959	2137.82	713.615	2137.82	713.613	3	19
1	167.84	57.1	P02760	AMBP_HUMAN	Protein AMBP OS=Homo sapiens GN=AMBP PE=1 SV=1	0	99	EDSCQLGYSAGPCMGMTSR	Carbamidomethyl(C)@4; Carbamidomethyl(C)@13; Oxidation(M)@14; Oxidation(M)@16		-0.000813551	2137.82	713.613	2137.82	713.613	3	20
1	167.84	57.1	P02760	AMBP_HUMAN	Protein AMBP OS=Homo sapiens GN=AMBP PE=1 SV=1	0	99	EDSCQLGYSAGPCMGMTSR	Carbamidomethyl(C)@4; Carbamidomethyl(C)@13; Oxidation(M)@14		0.00155059	2121.82	708.282	2121.82	708.281	3	23
1	167.84	57.1	P02760	AMBP_HUMAN	Protein AMBP OS=Homo sapiens GN=AMBP PE=1 SV=1	0	99	EDSCQLGYSAGPCMGMTSR	Carbamidomethyl(C)@4; Carbamidomethyl(C)@13; Oxidation(M)@14; Oxidation(M)@16		0.010722	2137.83	713.617	2137.82	713.613	3	20
1	167.84	57.1	P02760	AMBP_HUMAN	Protein AMBP OS=Homo sapiens GN=AMBP PE=1 SV=1	0	99	EDSCQLGYSAGPCMGMTSR	Cation:Na(D)@2; Carbamidomethyl(C)@4; Carbamidomethyl(C)@13; Oxidation(M)@14		0.00316008	2143.81	715.61	2143.8	715.609	3	20
1	167.84	57.1	P02760	AMBP_HUMAN	Protein AMBP OS=Homo sapiens GN=AMBP PE=1 SV=1	0	99	EDSCQLGYSAGPCMGMTSR	Carbamidomethyl(C)@4; Carbamidomethyl(C)@13; Oxidation(M)@14		0.00155059	2121.82	708.282	2121.82	708.281	3	24
1	167.84	57.1	P02760	AMBP_HUMAN	Protein AMBP OS=Homo sapiens GN=AMBP PE=1 SV=1	0	99	EDSCQLGYSAGPCMGMTSR	Carbamidomethyl(C)@4; Pro->pyro-Glu(P)@12; Carbamidomethyl(C)@13; Oxidation(M)@14		0.0367561	2135.84	712.953	2135.8	712.941	3	14
1	167.84	57.1	P02760	AMBP_HUMAN	Protein AMBP OS=Homo sapiens GN=AMBP PE=1 SV=1	0	99	EDSCQLGYSAGPCMGMTSR	Carbamidomethyl(C)@4; Amino(Y)@8; Carbamidomethyl(C)@13; Oxidation(M)@16		0.00523965	2136.84	713.287	2136.83	713.285	3	15
1	167.84	57.1	P02760	AMBP_HUMAN	Protein AMBP OS=Homo sapiens GN=AMBP PE=1 SV=1	0	99	EDSCQLGYSAGPCMGMTSR	Carbamidomethyl(C)@4; Carbamidomethyl(C)@13; Oxidation(M)@16; Cation:Na@C-term		0.00316008	2143.81	715.61	2143.8	715.609	3	17
1	167.84	57.1	P02760	AMBP_HUMAN	Protein AMBP OS=Homo sapiens GN=AMBP PE=1 SV=1	0	99	EDSCQLGYSAGPCMGMTSR	Carbamidomethyl(C)@4; Carbamidomethyl(C)@13; Oxidation(M)@14		0.00155059	2121.82	708.282	2121.82	708.281	3	21
1	167.84	57.1	P02760	AMBP_HUMAN	Protein AMBP OS=Homo sapiens GN=AMBP PE=1 SV=1	0	99	EDSCQLGYSAGPCMGMTSR	Carbamidomethyl(C)@4; Pro->pyro-Glu(P)@12; Carbamidomethyl(C)@13; Oxidation(M)@14		0.0369392	2135.84	712.953	2135.8	712.941	3	13
1	167.84	57.1	P02760	AMBP_HUMAN	Protein AMBP OS=Homo sapiens GN=AMBP PE=1 SV=1	0	99	EDSCQLGYSAGPCMGMTSR	Carbamidomethyl(C)@4; Carbamidomethyl(C)@13; Oxidation(M)@16; Cation:Na@C-term		-0.00617826	2143.8	715.607	2143.8	715.609	3	17
1	167.84	57.1	P02760	AMBP_HUMAN	Protein AMBP OS=Homo sapiens GN=AMBP PE=1 SV=1	0	99	EDSCQLGYSAGPCMGMTSR	Carbamidomethyl(C)@4; Carbamidomethyl(C)@13; Oxidation(M)@16		0.005762	2121.83	708.283	2121.82	708.281	3	22
1	167.84	57.1	P02760	AMBP_HUMAN	Protein AMBP OS=Homo sapiens GN=AMBP PE=1 SV=1	0	99	EDSCQLGYSAGPCMGMTSR	Cation:Na(E)@1; Carbamidomethyl(C)@4; Carbamidomethyl(C)@13; Oxidation(M)@16		-0.00617826	2143.8	715.607	2143.8	715.609	3	13
1	167.84	57.1	P02760	AMBP_HUMAN	Protein AMBP OS=Homo sapiens GN=AMBP PE=1 SV=1	0	99	EDSCQLGYSAGPCMGMTSR	Carbamidomethyl(C)@4; Carbamidomethyl(C)@13; Oxidation(M)@16		0.005762	2121.83	708.283	2121.82	708.281	3	24
1	167.84	57.1	P02760	AMBP_HUMAN	Protein AMBP OS=Homo sapiens GN=AMBP PE=1 SV=1	0	99	EDSCQLGYSAGPCMGMTSR	Carbamidomethyl(C)@4; Pro->pyro-Glu(P)@12; Carbamidomethyl(C)@13; Oxidation(M)@16		0.0466437	2135.85	712.957	2135.8	712.941	3	13
1	167.84	57.1	P02760	AMBP_HUMAN	Protein AMBP OS=Homo sapiens GN=AMBP PE=1 SV=1	0	99	EDSCQLGYSAGPCMGMTSR	Carbamidomethyl(C)@4; Carbamidomethyl(C)@13; Oxidation(M)@16		0.0118045	2121.83	708.285	2121.82	708.281	3	19
1	167.84	57.1	P02760	AMBP_HUMAN	Protein AMBP OS=Homo sapiens GN=AMBP PE=1 SV=1	0	99	EDSCQLGYSAGPCMGMTSR	Glu->pyro-Glu@N-term; Carbamidomethyl(C)@4; Carbamidomethyl(C)@13; Oxidation(M)@14; Oxidation(M)@16		0.000851315	2119.81	707.61	2119.81	707.609	3	22
1	167.84	57.1	P02760	AMBP_HUMAN	Protein AMBP OS=Homo sapiens GN=AMBP PE=1 SV=1	0	99	EDSCQLGYSAGPCMGMTSR	Glu->pyro-Glu@N-term; Cation:Na(D)@2; Carbamidomethyl(C)@4; Carbamidomethyl(C)@13; Oxidation(M)@14; Oxidation(M)@16		0.0112499	2141.8	714.941	2141.79	714.937	3	14
1	167.84	57.1	P02760	AMBP_HUMAN	Protein AMBP OS=Homo sapiens GN=AMBP PE=1 SV=1	0	99	EDSCQLGYSAGPCMGMTSR	Carbamidomethyl(C)@4; Amino(Y)@8; Carbamidomethyl(C)@13; Oxidation(M)@16		-0.00098591	2136.83	713.285	2136.83	713.285	3	14
1	167.84	57.1	P02760	AMBP_HUMAN	Protein AMBP OS=Homo sapiens GN=AMBP PE=1 SV=1	0	99	EDSCQLGYSAGPCMGMTSR	Glu->pyro-Glu@N-term; Carbamidomethyl(C)@4; Carbamidomethyl(C)@13; Oxidation(M)@14; Oxidation(M)@16		0.000851315	2119.81	707.61	2119.81	707.609	3	23
1	167.84	57.1	P02760	AMBP_HUMAN	Protein AMBP OS=Homo sapiens GN=AMBP PE=1 SV=1	0	99	EDSCQLGYSAGPCMGMTSR	Carbamidomethyl(C)@4; Carbamidomethyl(C)@13; Oxidation(M)@14; Oxidation(M)@16		0.00577822	2137.82	713.615	2137.82	713.613	3	18
1	167.84	57.1	P02760	AMBP_HUMAN	Protein AMBP OS=Homo sapiens GN=AMBP PE=1 SV=1	0	99	EDSCQLGYSAGPCMGMTSR	Delta:H(4)C(2)@N-term; Carbamidomethyl(C)@4; Deamidated(Q)@5; Carbamidomethyl(C)@13; Oxidation(M)@14; Oxidation(M)@16		0.00670259	2166.84	723.287	2166.83	723.285	3	14
1	167.84	57.1	P02760	AMBP_HUMAN	Protein AMBP OS=Homo sapiens GN=AMBP PE=1 SV=1	0	99	EDSCQLGYSAGPCMGMTSR	Carbamidomethyl(C)@4; Carbamidomethyl(C)@13; Oxidation(M)@16		0.00100128	2121.82	708.282	2121.82	708.281	3	17
1	167.84	57.1	P02760	AMBP_HUMAN	Protein AMBP OS=Homo sapiens GN=AMBP PE=1 SV=1	0	99	EDSCQLGYSAGPCMGMTSR	Carbamidomethyl(C)@4; Carbamidomethyl(C)@13; Oxidation(M)@16		0.0105227	2121.83	708.285	2121.82	708.281	3	20
1	167.84	57.1	P02760	AMBP_HUMAN	Protein AMBP OS=Homo sapiens GN=AMBP PE=1 SV=1	0	99	EDSCQLGYSAGPCMGMTSR	Carbamidomethyl(C)@4; Carbamidomethyl(C)@13		0.00556238	2105.83	702.952	2105.83	702.95	3	22
1	167.84	57.1	P02760	AMBP_HUMAN	Protein AMBP OS=Homo sapiens GN=AMBP PE=1 SV=1	0	99	EDSCQLGYSAGPCMGMTSR	Cation:Na(D)@2; Carbamidomethyl(C)@4; Carbamidomethyl(C)@13		0.00479191	2127.81	710.279	2127.81	710.277	3	16
1	167.84	57.1	P02760	AMBP_HUMAN	Protein AMBP OS=Homo sapiens GN=AMBP PE=1 SV=1	0	99	EDSCQLGYSAGPCMGMTSR	Carbamidomethyl(C)@4; Carbamidomethyl(C)@13		0.00556238	2105.83	702.952	2105.83	702.95	3	22
1	167.84	57.1	P02760	AMBP_HUMAN	Protein AMBP OS=Homo sapiens GN=AMBP PE=1 SV=1	0	99	EDSCQLGYSAGPCMGMTSR	Glu->pyro-Glu@N-term; Carbamidomethyl(C)@4; Oxidation(P)@12; Carbamidomethyl(C)@13; Oxidation(M)@14		0.0354581	2119.84	707.621	2119.81	707.609	3	12
1	167.84	57.1	P02760	AMBP_HUMAN	Protein AMBP OS=Homo sapiens GN=AMBP PE=1 SV=1	0	99	EDSCQLGYSAGPCMGMTSR	Carbamidomethyl(C)@4; Carbamidomethyl(C)@13		0.00556238	2105.83	702.952	2105.83	702.95	3	21
1	167.84	57.1	P02760	AMBP_HUMAN	Protein AMBP OS=Homo sapiens GN=AMBP PE=1 SV=1	0	99	EDSCQLGYSAGPCMGMTSR	Glu->pyro-Glu@N-term; Carbamidomethyl(C)@4; Carbamidomethyl(C)@13; Oxidation(M)@14		0.00248271	2103.81	702.279	2103.81	702.278	3	22
1	167.84	57.1	P02760	AMBP_HUMAN	Protein AMBP OS=Homo sapiens GN=AMBP PE=1 SV=1	0	99	EDSCQLGYSAGPCMGMTSR	Carbamidomethyl(C)@4; Carbamidomethyl(C)@13		-1.00847	2104.82	702.614	2105.83	702.95	3	18
1	167.84	57.1	P02760	AMBP_HUMAN	Protein AMBP OS=Homo sapiens GN=AMBP PE=1 SV=1	0	99	EDSCQLGYSAGPCMGMTSR	Glu->pyro-Glu@N-term; Carbamidomethyl(C)@4; Carbamidomethyl(C)@13; Oxidation(M)@14		0.00248271	2103.81	702.279	2103.81	702.278	3	20
1	167.84	57.1	P02760	AMBP_HUMAN	Protein AMBP OS=Homo sapiens GN=AMBP PE=1 SV=1	0	99	EDSCQLGYSAGPCMGMTSR	Glu->pyro-Glu@N-term; Carbamidomethyl(C)@4; Carbamidomethyl(C)@13; Oxidation(M)@16		0.00284892	2103.81	702.279	2103.81	702.278	3	22
1	167.84	57.1	P02760	AMBP_HUMAN	Protein AMBP OS=Homo sapiens GN=AMBP PE=1 SV=1	0	99	EDSCQLGYSAGPCMGMTSR	Glu->pyro-Glu@N-term; Carbamidomethyl(C)@4; Carbamidomethyl(C)@13		0.0141846	2087.83	696.951	2087.82	696.946	3	17
1	167.84	57.1	P02760	AMBP_HUMAN	Protein AMBP OS=Homo sapiens GN=AMBP PE=1 SV=1	0	99	EDSCQLGYSAGPCMGMTSR	Carbamidomethyl(C)@4; Carbamidomethyl(C)@13; Oxidation(M)@14; Oxidation(M)@16		0.00171105	2137.82	713.614	2137.82	713.613	3	20
1	167.84	57.1	P02760	AMBP_HUMAN	Protein AMBP OS=Homo sapiens GN=AMBP PE=1 SV=1	0	99	EDSCQLGYSAGPCMGMTSR	Cation:Na(D)@2; Carbamidomethyl(C)@4; Carbamidomethyl(C)@13; Oxidation(M)@14; Oxidation(M)@16		-0.00097991	2159.8	720.94	2159.8	720.94	3	14
1	167.84	57.1	P02760	AMBP_HUMAN	Protein AMBP OS=Homo sapiens GN=AMBP PE=1 SV=1	0	99	EDSCQLGYSAGPCMGMTSR	Carbamidomethyl(C)@4; Carbamidomethyl(C)@13; Oxidation(M)@14; Oxidation(M)@16		-0.00213417	2137.82	713.612	2137.82	713.613	3	20
1	167.84	57.1	P02760	AMBP_HUMAN	Protein AMBP OS=Homo sapiens GN=AMBP PE=1 SV=1	0	99	EDSCQLGYSAGPCMGMTSR	Carbamidomethyl(C)@4; Carbamidomethyl(C)@13; Oxidation(M)@14; Dioxidation(M)@16		0.00435917	2153.82	718.946	2153.81	718.945	3	17
1	167.84	57.1	P02760	AMBP_HUMAN	Protein AMBP OS=Homo sapiens GN=AMBP PE=1 SV=1	0	99	EDSCQLGYSAGPCMGMTSR	Carbamidomethyl(C)@4; Carbamidomethyl(C)@13; Oxidation(M)@14		0.00437286	2121.83	708.283	2121.82	708.281	3	23
1	167.84	57.1	P02760	AMBP_HUMAN	Protein AMBP OS=Homo sapiens GN=AMBP PE=1 SV=1	0	99	EDSCQLGYSAGPCMGMTSR	Carbamidomethyl(C)@4; Carbamidomethyl(C)@13; Oxidation(M)@14		0.00437286	2121.83	708.283	2121.82	708.281	3	21
1	167.84	57.1	P02760	AMBP_HUMAN	Protein AMBP OS=Homo sapiens GN=AMBP PE=1 SV=1	0	99	EDSCQLGYSAGPCMGMTSR	Carbamidomethyl(C)@4; Carbamidomethyl(C)@13; Oxidation(M)@16		0.00437286	2121.83	708.283	2121.82	708.281	3	20
1	167.84	57.1	P02760	AMBP_HUMAN	Protein AMBP OS=Homo sapiens GN=AMBP PE=1 SV=1	0	99	EDSCQLGYSAGPCMGMTSR	Carbamidomethyl(C)@4; Carbamidomethyl(C)@13; Oxidation(M)@16		0.00437286	2121.83	708.283	2121.82	708.281	3	21
1	167.84	57.1	P02760	AMBP_HUMAN	Protein AMBP OS=Homo sapiens GN=AMBP PE=1 SV=1	0	99	EDSCQLGYSAGPCMGMTSR	Carbamidomethyl(C)@4; Carbamidomethyl(C)@13		0.00373864	2105.83	702.951	2105.83	702.95	3	22
1	167.84	57.1	P02760	AMBP_HUMAN	Protein AMBP OS=Homo sapiens GN=AMBP PE=1 SV=1	0	99	EDSCQLGYSAGPCMGMTSR	Cation:Na(D)@2; Carbamidomethyl(C)@4; Carbamidomethyl(C)@13; Oxidation(M)@14; Oxidation(M)@16		0.000460217	2159.8	720.941	2159.8	720.94	3	16
1	167.84	57.1	P02760	AMBP_HUMAN	Protein AMBP OS=Homo sapiens GN=AMBP PE=1 SV=1	0	99	EDSCQLGYSAGPCMGMTSR	Carbamidomethyl(C)@4; Carbamidomethyl(C)@13; Oxidation(M)@14; Dioxidation(M)@16		0.00618339	2153.82	718.947	2153.81	718.945	3	20
1	167.84	57.1	P02760	AMBP_HUMAN	Protein AMBP OS=Homo sapiens GN=AMBP PE=1 SV=1	0	99	EDSCQLGYSAGPCMGMTSR	Carbamidomethyl(C)@4; Carbamidomethyl(C)@13; Oxidation(M)@14; Carbamyl(M)@16		0.00341344	2164.83	722.618	2164.83	722.617	3	22
1	167.84	57.1	P02760	AMBP_HUMAN	Protein AMBP OS=Homo sapiens GN=AMBP PE=1 SV=1	0	99	EDSCQLGYSAGPCMGMTSR	Carbamidomethyl(C)@4; Carbamidomethyl(C)@13; Oxidation(M)@14; Dioxidation(M)@16		0.00618339	2153.82	718.947	2153.81	718.945	3	21
1	167.84	57.1	P02760	AMBP_HUMAN	Protein AMBP OS=Homo sapiens GN=AMBP PE=1 SV=1	0	99	EDSCQLGYSAGPCMGMTSR	Cation:Na(E)@1; Carbamidomethyl(C)@4; Carbamidomethyl(C)@13; Oxidation(M)@14		-0.00232316	2143.8	715.608	2143.8	715.609	3	17
1	167.84	57.1	P02760	AMBP_HUMAN	Protein AMBP OS=Homo sapiens GN=AMBP PE=1 SV=1	0	99	EDSCQLGYSAGPCMGMTSR	Cation:Na(E)@1; Carbamidomethyl(C)@4; Carbamidomethyl(C)@13; Oxidation(M)@16		-0.000309003	2143.8	715.609	2143.8	715.609	3	15
1	167.84	57.1	P02760	AMBP_HUMAN	Protein AMBP OS=Homo sapiens GN=AMBP PE=1 SV=1	0	99	EDSCQLGYSAGPCMGMTSR	Carbamidomethyl(C)@4; Carbamidomethyl(C)@13		-2.00753	2103.82	702.281	2105.83	702.95	3	22
1	167.84	57.1	P02760	AMBP_HUMAN	Protein AMBP OS=Homo sapiens GN=AMBP PE=1 SV=1	0	99	EDSCQLGYSAGPCMGMTSR	Cation:Na(D)@2; Carbamidomethyl(C)@4; Carbamidomethyl(C)@13		-0.000712245	2127.81	710.277	2127.81	710.277	3	16
1	167.84	57.1	P02760	AMBP_HUMAN	Protein AMBP OS=Homo sapiens GN=AMBP PE=1 SV=1	0	99	EDSCQLGYSAGPCMGMTSR	Cation:Na(D)@2; Carbamidomethyl(C)@4; Carbamidomethyl(C)@13		-0.000712245	2127.81	710.277	2127.81	710.277	3	16
1	167.84	57.1	P02760	AMBP_HUMAN	Protein AMBP OS=Homo sapiens GN=AMBP PE=1 SV=1	0	99	EDSCQLGYSAGPCMGMTSR	Carbamidomethyl(C)@4; Pro->pyro-Glu(P)@12; Carbamidomethyl(C)@13		0.0451413	2119.85	707.625	2119.81	707.609	3	16
1	167.84	57.1	P02760	AMBP_HUMAN	Protein AMBP OS=Homo sapiens GN=AMBP PE=1 SV=1	0	99	EDSCQLGYSAGPCMGMTSR	Carbamidomethyl(C)@4; Carbamidomethyl(C)@13; Oxidation(M)@14; Oxidation(M)@16		0.00635982	2137.82	713.615	2137.82	713.613	3	21
1	167.84	57.1	P02760	AMBP_HUMAN	Protein AMBP OS=Homo sapiens GN=AMBP PE=1 SV=1	0	99	EDSCQLGYSAGPCMGMTSR	Carbamidomethyl(C)@4; Carbamidomethyl(C)@13; Oxidation(M)@14; Oxidation(M)@16		-0.00280462	2137.82	1069.91	2137.82	1069.92	2	19
1	167.84	57.1	P02760	AMBP_HUMAN	Protein AMBP OS=Homo sapiens GN=AMBP PE=1 SV=1	0	99	EDSCQLGYSAGPCMGMTSR	Carbamidomethyl(C)@4; Carbamidomethyl(C)@13; Oxidation(M)@14; Oxidation(M)@16		0.00672602	2137.82	713.615	2137.82	713.613	3	21
1	167.84	57.1	P02760	AMBP_HUMAN	Protein AMBP OS=Homo sapiens GN=AMBP PE=1 SV=1	0	99	EDSCQLGYSAGPCMGMTSR	Carbamidomethyl(C)@4; Carbamidomethyl(C)@13; Oxidation(M)@14; Oxidation(M)@16		0.00672602	2137.82	713.615	2137.82	713.613	3	21
1	167.84	57.1	P02760	AMBP_HUMAN	Protein AMBP OS=Homo sapiens GN=AMBP PE=1 SV=1	0	99	EDSCQLGYSAGPCMGMTSR	Carbamidomethyl(C)@4; Carbamidomethyl(C)@13; Oxidation(M)@14; Oxidation(M)@16		0.000683587	2137.82	713.613	2137.82	713.613	3	19
1	167.84	57.1	P02760	AMBP_HUMAN	Protein AMBP OS=Homo sapiens GN=AMBP PE=1 SV=1	0	99	EDSCQLGYSAGPCMGMTSR	Carbamidomethyl(C)@4; Carbamidomethyl(C)@13; Oxidation(M)@14; Oxidation(M)@16		0.00672602	2137.82	713.615	2137.82	713.613	3	18
1	167.84	57.1	P02760	AMBP_HUMAN	Protein AMBP OS=Homo sapiens GN=AMBP PE=1 SV=1	0	99	EDSCQLGYSAGPCMGMTSR	Carbamidomethyl(C)@4; Carbamidomethyl(C)@13; Oxidation(M)@14; Oxidation(M)@16		0.00159911	2137.82	713.614	2137.82	713.613	3	18
1	167.84	57.1	P02760	AMBP_HUMAN	Protein AMBP OS=Homo sapiens GN=AMBP PE=1 SV=1	0	99	EDSCQLGYSAGPCMGMTSR	Carbamidomethyl(C)@4; Carbamidomethyl(C)@13; Oxidation(M)@14; Oxidation(M)@16		0.00599361	2137.82	713.615	2137.82	713.613	3	17
1	167.84	57.1	P02760	AMBP_HUMAN	Protein AMBP OS=Homo sapiens GN=AMBP PE=1 SV=1	0	99	EDSCQLGYSAGPCMGMTSR	Carbamidomethyl(C)@4; Carbamidomethyl(C)@13; Oxidation(M)@14; Oxidation(M)@16		0.00214842	2137.82	713.614	2137.82	713.613	3	18
1	167.84	57.1	P02760	AMBP_HUMAN	Protein AMBP OS=Homo sapiens GN=AMBP PE=1 SV=1	0	99	EDSCQLGYSAGPCMGMTSR	Carbamidomethyl(C)@4; Carbamidomethyl(C)@13; Oxidation(M)@14; Oxidation(M)@16		0.00214842	2137.82	713.614	2137.82	713.613	3	21
1	167.84	57.1	P02760	AMBP_HUMAN	Protein AMBP OS=Homo sapiens GN=AMBP PE=1 SV=1	0	99	EDSCQLGYSAGPCMGMTSR	Carbamidomethyl(C)@4; Carbamidomethyl(C)@13; Oxidation(M)@14; Oxidation(M)@16		0.00764155	2137.82	713.616	2137.82	713.613	3	20
1	167.84	57.1	P02760	AMBP_HUMAN	Protein AMBP OS=Homo sapiens GN=AMBP PE=1 SV=1	0	99	EDSCQLGYSAGPCMGMTSR	Carbamidomethyl(C)@4; Carbamidomethyl(C)@13; Oxidation(M)@14; Oxidation(M)@16		0.00690913	2137.82	713.615	2137.82	713.613	3	19
1	167.84	57.1	P02760	AMBP_HUMAN	Protein AMBP OS=Homo sapiens GN=AMBP PE=1 SV=1	0	99	EDSCQLGYSAGPCMGMTSR	Carbamidomethyl(C)@4; Carbamidomethyl(C)@13; Oxidation(M)@14; Oxidation(M)@16		0.00727534	2137.82	713.615	2137.82	713.613	3	18
1	167.84	57.1	P02760	AMBP_HUMAN	Protein AMBP OS=Homo sapiens GN=AMBP PE=1 SV=1	0	99	EDSCQLGYSAGPCMGMTSR	Carbamidomethyl(C)@4; Carbamidomethyl(C)@13; Oxidation(M)@14; Oxidation(M)@16		0.00764155	2137.82	713.616	2137.82	713.613	3	19
1	167.84	57.1	P02760	AMBP_HUMAN	Protein AMBP OS=Homo sapiens GN=AMBP PE=1 SV=1	0	99	EDSCQLGYSAGPCMGMTSR	Carbamidomethyl(C)@4; Carbamidomethyl(C)@13; Oxidation(M)@14		0.00419537	2121.83	708.283	2121.82	708.281	3	22
1	167.84	57.1	P02760	AMBP_HUMAN	Protein AMBP OS=Homo sapiens GN=AMBP PE=1 SV=1	0	99	EDSCQLGYSAGPCMGMTSR	Carbamidomethyl(C)@4; Carbamidomethyl(C)@13; Oxidation(M)@14; Oxidation(M)@16		0.00214842	2137.82	713.614	2137.82	713.613	3	19
1	167.84	57.1	P02760	AMBP_HUMAN	Protein AMBP OS=Homo sapiens GN=AMBP PE=1 SV=1	0	99	EDSCQLGYSAGPCMGMTSR	Carbamidomethyl(C)@4; Carbamidomethyl(C)@13; Oxidation(M)@14		0.00419537	2121.83	708.283	2121.82	708.281	3	23
1	167.84	57.1	P02760	AMBP_HUMAN	Protein AMBP OS=Homo sapiens GN=AMBP PE=1 SV=1	0	99	EDSCQLGYSAGPCMGMTSR	Carbamidomethyl(C)@4; Carbamidomethyl(C)@13; Oxidation(M)@14		0.00419537	2121.83	708.283	2121.82	708.281	3	22
1	167.84	57.1	P02760	AMBP_HUMAN	Protein AMBP OS=Homo sapiens GN=AMBP PE=1 SV=1	0	99	EDSCQLGYSAGPCMGMTSR	Carbamidomethyl(C)@4; Carbamidomethyl(C)@13; Oxidation(M)@16		0.00456158	2121.83	708.283	2121.82	708.281	3	23
1	167.84	57.1	P02760	AMBP_HUMAN	Protein AMBP OS=Homo sapiens GN=AMBP PE=1 SV=1	0	99	EDSCQLGYSAGPCMGMTSR	Carbamidomethyl(C)@4; Carbamidomethyl(C)@13; Oxidation(M)@16		0.00456158	2121.83	708.283	2121.82	708.281	3	21
1	167.84	57.1	P02760	AMBP_HUMAN	Protein AMBP OS=Homo sapiens GN=AMBP PE=1 SV=1	0	99	EDSCQLGYSAGPCMGMTSR	Carbamidomethyl(C)@4; Carbamidomethyl(C)@13; Oxidation(M)@16		0.00474468	2121.83	708.283	2121.82	708.281	3	20
1	167.84	57.1	P02760	AMBP_HUMAN	Protein AMBP OS=Homo sapiens GN=AMBP PE=1 SV=1	0	99	EDSCQLGYSAGPCMGMTSR	Glu->pyro-Glu@N-term; Carbamidomethyl(C)@4; Carbamidomethyl(C)@13; Oxidation(M)@14; Oxidation(M)@16		0.00807987	2119.81	707.612	2119.81	707.609	3	18
1	167.84	57.1	P02760	AMBP_HUMAN	Protein AMBP OS=Homo sapiens GN=AMBP PE=1 SV=1	0	99	EDSCQLGYSAGPCMGMTSR	Carbamidomethyl(C)@4; Carbamidomethyl(C)@13; Oxidation(M)@14		0.00364606	2121.83	708.283	2121.82	708.281	3	21
1	167.84	57.1	P02760	AMBP_HUMAN	Protein AMBP OS=Homo sapiens GN=AMBP PE=1 SV=1	0	99	EDSCQLGYSAGPCMGMTSR	Carbamidomethyl(C)@4; Carbamidomethyl(C)@13; Oxidation(M)@16		0.00273053	2121.82	708.282	2121.82	708.281	3	21
1	167.84	57.1	P02760	AMBP_HUMAN	Protein AMBP OS=Homo sapiens GN=AMBP PE=1 SV=1	0	99	EDSCQLGYSAGPCMGMTSR	Carbamidomethyl(C)@4; Carbamidomethyl(C)@13; Oxidation(M)@14		0.00236433	2121.82	708.282	2121.82	708.281	3	20
1	167.84	57.1	P02760	AMBP_HUMAN	Protein AMBP OS=Homo sapiens GN=AMBP PE=1 SV=1	0	99	EDSCQLGYSAGPCMGMTSR	Carbamidomethyl(C)@4; Carbamidomethyl(C)@13; Oxidation(M)@14		0.00456158	2121.83	708.283	2121.82	708.281	3	19
1	167.84	57.1	P02760	AMBP_HUMAN	Protein AMBP OS=Homo sapiens GN=AMBP PE=1 SV=1	0	99	EDSCQLGYSAGPCMGMTSR	Carbamidomethyl(C)@4; Carbamidomethyl(C)@13; Oxidation(M)@14		-0.000382236	2121.82	708.281	2121.82	708.281	3	20
1	167.84	57.1	P02760	AMBP_HUMAN	Protein AMBP OS=Homo sapiens GN=AMBP PE=1 SV=1	0	99	EDSCQLGYSAGPCMGMTSR	Carbamidomethyl(C)@4; Carbamidomethyl(C)@13; Oxidation(M)@14		0.00327985	2121.83	708.283	2121.82	708.281	3	19
1	167.84	57.1	P02760	AMBP_HUMAN	Protein AMBP OS=Homo sapiens GN=AMBP PE=1 SV=1	0	99	EDSCQLGYSAGPCMGMTSR	Carbamidomethyl(C)@4; Carbamidomethyl(C)@13; Oxidation(M)@14		-0.000565341	2121.82	708.281	2121.82	708.281	3	20
1	167.84	57.1	P02760	AMBP_HUMAN	Protein AMBP OS=Homo sapiens GN=AMBP PE=1 SV=1	0	99	EDSCQLGYSAGPCMGMTSR	Carbamidomethyl(C)@4; Carbamidomethyl(C)@13; Oxidation(M)@14		0.00273053	2121.82	708.282	2121.82	708.281	3	21
1	167.84	57.1	P02760	AMBP_HUMAN	Protein AMBP OS=Homo sapiens GN=AMBP PE=1 SV=1	0	99	EDSCQLGYSAGPCMGMTSR	Carbamidomethyl(C)@4; Carbamidomethyl(C)@13; Oxidation(M)@14		-0.000565341	2121.82	708.281	2121.82	708.281	3	21
1	167.84	57.1	P02760	AMBP_HUMAN	Protein AMBP OS=Homo sapiens GN=AMBP PE=1 SV=1	0	99	EDSCQLGYSAGPCMGMTSR	Carbamidomethyl(C)@4; Carbamidomethyl(C)@13; Oxidation(M)@14		-0.00184707	2121.82	708.281	2121.82	708.281	3	19
1	167.84	57.1	P02760	AMBP_HUMAN	Protein AMBP OS=Homo sapiens GN=AMBP PE=1 SV=1	0	99	EDSCQLGYSAGPCMGMTSR	Carbamidomethyl(C)@4; Carbamidomethyl(C)@13		0.00404467	2105.83	702.951	2105.83	702.95	3	21
1	167.84	57.1	P02760	AMBP_HUMAN	Protein AMBP OS=Homo sapiens GN=AMBP PE=1 SV=1	0	99	EDSCQLGYSAGPCMGMTSR	Carbamidomethyl(C)@4; Carbamidomethyl(C)@13; Oxidation(M)@14		0.00327985	2121.83	708.283	2121.82	708.281	3	20
1	167.84	57.1	P02760	AMBP_HUMAN	Protein AMBP OS=Homo sapiens GN=AMBP PE=1 SV=1	0	99	EDSCQLGYSAGPCMGMTSR	Carbamidomethyl(C)@4; Carbamidomethyl(C)@13		0.00404467	2105.83	702.951	2105.83	702.95	3	24
1	167.84	57.1	P02760	AMBP_HUMAN	Protein AMBP OS=Homo sapiens GN=AMBP PE=1 SV=1	0	99	EDSCQLGYSAGPCMGMTSR	Carbamidomethyl(C)@4; Carbamidomethyl(C)@13		0.00404467	2105.83	702.951	2105.83	702.95	3	23
1	167.84	57.1	P02760	AMBP_HUMAN	Protein AMBP OS=Homo sapiens GN=AMBP PE=1 SV=1	0	99	EDSCQLGYSAGPCMGMTSR	Carbamidomethyl(C)@4; Carbamidomethyl(C)@13		0.00349536	2105.83	702.951	2105.83	702.95	3	18
1	167.84	57.1	P02760	AMBP_HUMAN	Protein AMBP OS=Homo sapiens GN=AMBP PE=1 SV=1	0	99	EDSCQLGYSAGPCMGMTSR	Glu->pyro-Glu@N-term; Carbamidomethyl(C)@4; Carbamidomethyl(C)@13; Oxidation(M)@14		-0.000676771	2103.81	702.278	2103.81	702.278	3	22
1	167.84	57.1	P02760	AMBP_HUMAN	Protein AMBP OS=Homo sapiens GN=AMBP PE=1 SV=1	0	99	EDSCQLGYSAGPCMGMTSR	Carbamidomethyl(C)@4; Deamidated(Q)@5; Carbamidomethyl(C)@13		0.00769303	2106.82	703.28	2106.81	703.278	3	18
1	167.84	57.1	P02760	AMBP_HUMAN	Protein AMBP OS=Homo sapiens GN=AMBP PE=1 SV=1	0	99	EDSCQLGYSAGPCMGMTSR	Glu->pyro-Glu@N-term; Carbamidomethyl(C)@4; No Carbamidomethyl(C)@13; Oxidation(M)@14; Oxidation(M)@16		0.0160011	2062.8	688.608	2062.79	688.602	3	12
1	167.84	57.1	P02760	AMBP_HUMAN	Protein AMBP OS=Homo sapiens GN=AMBP PE=1 SV=1	0	99	EDSCQLGYSAGPCMGMTSR	Carbamidomethyl(C)@4; Carbamidomethyl(C)@13; Oxidation(M)@14; Oxidation(M)@16		0.00384903	2137.82	713.614	2137.82	713.613	3	23
1	167.84	57.1	P02760	AMBP_HUMAN	Protein AMBP OS=Homo sapiens GN=AMBP PE=1 SV=1	0	99	EDSCQLGYSAGPCMGMTSR	Carbamidomethyl(C)@4; Carbamidomethyl(C)@13; Oxidation(M)@14; Oxidation(M)@16		0.00384903	2137.82	713.614	2137.82	713.613	3	22
1	167.84	57.1	P02760	AMBP_HUMAN	Protein AMBP OS=Homo sapiens GN=AMBP PE=1 SV=1	0	99	EDSCQLGYSAGPCMGMTSR	Carbamidomethyl(C)@4; Carbamidomethyl(C)@13; Oxidation(M)@14; Oxidation(M)@16		0.00384903	2137.82	713.614	2137.82	713.613	3	21
1	167.84	57.1	P02760	AMBP_HUMAN	Protein AMBP OS=Homo sapiens GN=AMBP PE=1 SV=1	0	99	EDSCQLGYSAGPCMGMTSR	Carbamidomethyl(C)@4; Carbamidomethyl(C)@13; Oxidation(M)@14; Oxidation(M)@16		0.00384903	2137.82	713.614	2137.82	713.613	3	20
1	167.84	57.1	P02760	AMBP_HUMAN	Protein AMBP OS=Homo sapiens GN=AMBP PE=1 SV=1	0	99	EDSCQLGYSAGPCMGMTSR	Carbamidomethyl(C)@4; Carbamidomethyl(C)@13; Oxidation(M)@14; Oxidation(M)@16		0.00329971	2137.82	713.614	2137.82	713.613	3	20
1	167.84	57.1	P02760	AMBP_HUMAN	Protein AMBP OS=Homo sapiens GN=AMBP PE=1 SV=1	0	99	EDSCQLGYSAGPCMGMTSR	Carbamidomethyl(C)@4; Carbamidomethyl(C)@13; Oxidation(M)@14; Carbamyl(M)@16		0.0116959	2164.84	722.621	2164.83	722.617	3	20
1	167.84	57.1	P02760	AMBP_HUMAN	Protein AMBP OS=Homo sapiens GN=AMBP PE=1 SV=1	0	99	EDSCQLGYSAGPCMGMTSR	Carbamidomethyl(C)@4; Carbamidomethyl(C)@13; Oxidation(M)@14; Dioxidation(M)@16		0.00430319	2153.82	718.946	2153.81	718.945	3	20
1	167.84	57.1	P02760	AMBP_HUMAN	Protein AMBP OS=Homo sapiens GN=AMBP PE=1 SV=1	0	99	EDSCQLGYSAGPCMGMTSR	Carbamidomethyl(C)@4; Carbamidomethyl(C)@13; Oxidation(M)@14; Dioxidation(M)@16		0.00430319	2153.82	718.946	2153.81	718.945	3	19
1	167.84	57.1	P02760	AMBP_HUMAN	Protein AMBP OS=Homo sapiens GN=AMBP PE=1 SV=1	0	99	EDSCQLGYSAGPCMGMTSR	Carbamidomethyl(C)@4; Carbamidomethyl(C)@13; Oxidation(M)@14		0.000647617	2121.82	708.282	2121.82	708.281	3	22
1	167.84	57.1	P02760	AMBP_HUMAN	Protein AMBP OS=Homo sapiens GN=AMBP PE=1 SV=1	0	99	EDSCQLGYSAGPCMGMTSR	Carbamidomethyl(C)@4; Carbamidomethyl(C)@13; Oxidation(M)@16; Cation:Na@C-term		-0.00302201	2143.8	715.608	2143.8	715.609	3	15
1	167.84	57.1	P02760	AMBP_HUMAN	Protein AMBP OS=Homo sapiens GN=AMBP PE=1 SV=1	0	99	EDSCQLGYSAGPCMGMTSR	Carbamidomethyl(C)@4; Carbamidomethyl(C)@13; Oxidation(M)@14		0.00028141	2121.82	708.282	2121.82	708.281	3	23
1	167.84	57.1	P02760	AMBP_HUMAN	Protein AMBP OS=Homo sapiens GN=AMBP PE=1 SV=1	0	99	EDSCQLGYSAGPCMGMTSR	Cation:Na(E)@1; Carbamidomethyl(C)@4; Carbamidomethyl(C)@13; Oxidation(M)@14		-0.00265581	2143.8	715.608	2143.8	715.609	3	14
1	167.84	57.1	P02760	AMBP_HUMAN	Protein AMBP OS=Homo sapiens GN=AMBP PE=1 SV=1	0	99	EDSCQLGYSAGPCMGMTSR	Carbamidomethyl(C)@4; Carbamidomethyl(C)@13; Oxidation(M)@14		0.00028141	2121.82	708.282	2121.82	708.281	3	21
1	167.84	57.1	P02760	AMBP_HUMAN	Protein AMBP OS=Homo sapiens GN=AMBP PE=1 SV=1	0	99	EDSCQLGYSAGPCMGMTSR	Carbamidomethyl(C)@4; Pro->pyro-Glu(P)@12; Carbamidomethyl(C)@13; Oxidation(M)@14		0.0401506	2135.84	712.955	2135.8	712.941	3	16
1	167.84	57.1	P02760	AMBP_HUMAN	Protein AMBP OS=Homo sapiens GN=AMBP PE=1 SV=1	0	99	EDSCQLGYSAGPCMGMTSR	Carbamidomethyl(C)@4; Carbamidomethyl(C)@13; Oxidation(M)@16		0.00449279	2121.83	708.283	2121.82	708.281	3	24
1	167.84	57.1	P02760	AMBP_HUMAN	Protein AMBP OS=Homo sapiens GN=AMBP PE=1 SV=1	0	99	EDSCQLGYSAGPCMGMTSR	Cation:Na(E)@1; Carbamidomethyl(C)@4; Carbamidomethyl(C)@13; Oxidation(M)@16		0.00173868	2143.81	715.609	2143.8	715.609	3	14
1	167.84	57.1	P02760	AMBP_HUMAN	Protein AMBP OS=Homo sapiens GN=AMBP PE=1 SV=1	0	99	EDSCQLGYSAGPCMGMTSR	Carbamidomethyl(C)@4; Carbamidomethyl(C)@13; Oxidation(M)@16		0.00449279	2121.83	708.283	2121.82	708.281	3	22
1	167.84	57.1	P02760	AMBP_HUMAN	Protein AMBP OS=Homo sapiens GN=AMBP PE=1 SV=1	0	99	EDSCQLGYSAGPCMGMTSR	Glu->pyro-Glu@N-term; Carbamidomethyl(C)@4; Carbamidomethyl(C)@13; Oxidation(M)@14; Oxidation(M)@16		0.015343	2119.82	707.615	2119.81	707.609	3	22
1	167.84	57.1	P02760	AMBP_HUMAN	Protein AMBP OS=Homo sapiens GN=AMBP PE=1 SV=1	0	99	EDSCQLGYSAGPCMGMTSR	Carbamidomethyl(C)@4; Carbamidomethyl(C)@13		0.00605139	2105.83	702.952	2105.83	702.95	3	22
1	167.84	57.1	P02760	AMBP_HUMAN	Protein AMBP OS=Homo sapiens GN=AMBP PE=1 SV=1	0	99	EDSCQLGYSAGPCMGMTSR	Cation:Na(E)@1; Carbamidomethyl(C)@4; Carbamidomethyl(C)@13		0.00457994	2127.81	710.279	2127.81	710.277	3	15
1	167.84	57.1	P02760	AMBP_HUMAN	Protein AMBP OS=Homo sapiens GN=AMBP PE=1 SV=1	0	99	EDSCQLGYSAGPCMGMTSR	Carbamidomethyl(C)@4; Carbamidomethyl(C)@13		0.00605139	2105.83	702.952	2105.83	702.95	3	24
1	167.84	57.1	P02760	AMBP_HUMAN	Protein AMBP OS=Homo sapiens GN=AMBP PE=1 SV=1	0	99	EDSCQLGYSAGPCMGMTSR	Carbamidomethyl(C)@4; Carbamidomethyl(C)@13		0.00605139	2105.83	702.952	2105.83	702.95	3	21
1	167.84	57.1	P02760	AMBP_HUMAN	Protein AMBP OS=Homo sapiens GN=AMBP PE=1 SV=1	0	99	EDSCQLGYSAGPCMGMTSR	Carbamidomethyl(C)@4; Carbamidomethyl(C)@13; Oxidation(M)@14; Dioxidation(M)@16		0.00229894	2153.81	718.945	2153.81	718.945	3	22
1	167.84	57.1	P02760	AMBP_HUMAN	Protein AMBP OS=Homo sapiens GN=AMBP PE=1 SV=1	0	99	EDSCQLGYSAGPCMGMTSR	Carbamidomethyl(C)@4; Carbamidomethyl(C)@13; Oxidation(M)@14; Carbamyl(M)@16		-0.00137459	2164.83	722.616	2164.83	722.617	3	20
1	167.84	57.1	P02760	AMBP_HUMAN	Protein AMBP OS=Homo sapiens GN=AMBP PE=1 SV=1	0	99	EDSCQLGYSAGPCMGMTSR	Carbamidomethyl(C)@4; Carbamidomethyl(C)@13; Oxidation(M)@14; Dioxidation(M)@16		0.00211583	2153.81	718.945	2153.81	718.945	3	23
1	167.84	57.1	P02760	AMBP_HUMAN	Protein AMBP OS=Homo sapiens GN=AMBP PE=1 SV=1	0	99	EDSCQLGYSAGPCMGMTSR	Carbamidomethyl(C)@4; Carbamidomethyl(S)@9; Carbamidomethyl(C)@13		0.000571923	2162.85	721.957	2162.85	721.957	3	12
1	167.84	57.1	P02760	AMBP_HUMAN	Protein AMBP OS=Homo sapiens GN=AMBP PE=1 SV=1	0	99	EDSCQLGYSAGPCMGMTSR	Carbamidomethyl(C)@4; Carbamidomethyl(C)@13; Oxidation(M)@14; Oxidation(M)@16		0.00343646	2137.82	713.614	2137.82	713.613	3	20
1	167.84	57.1	P02760	AMBP_HUMAN	Protein AMBP OS=Homo sapiens GN=AMBP PE=1 SV=1	0	99	EDSCQLGYSAGPCMGMTSR	Carbamidomethyl(C)@4; Carbamidomethyl(C)@13; Oxidation(M)@14; Oxidation(M)@16		0.00343646	2137.82	713.614	2137.82	713.613	3	22
1	167.84	57.1	P02760	AMBP_HUMAN	Protein AMBP OS=Homo sapiens GN=AMBP PE=1 SV=1	0	99	EDSCQLGYSAGPCMGMTSR	Glu->pyro-Glu@N-term; Carbamidomethyl(C)@4; No Carbamidomethyl(C)@13; Oxidation(M)@16		0.0186406	2046.81	683.277	2046.79	683.271	3	12
1	167.84	57.1	P02760	AMBP_HUMAN	Protein AMBP OS=Homo sapiens GN=AMBP PE=1 SV=1	0	99	EDSCQLGYSAGPCMGMTSR	Cation:Na(E)@1; Carbamidomethyl(C)@4; Carbamidomethyl(C)@13; Oxidation(M)@14; Oxidation(M)@16		0.00378744	2159.8	720.942	2159.8	720.94	3	14
1	167.84	57.1	P02760	AMBP_HUMAN	Protein AMBP OS=Homo sapiens GN=AMBP PE=1 SV=1	0	99	EDSCQLGYSAGPCMGMTSR	Carbamidomethyl(C)@4; Carbamidomethyl(C)@13; Oxidation(M)@14; Oxidation(M)@16		0.00728163	2137.82	713.615	2137.82	713.613	3	21
1	167.84	57.1	P02760	AMBP_HUMAN	Protein AMBP OS=Homo sapiens GN=AMBP PE=1 SV=1	0	99	EDSCQLGYSAGPCMGMTSR	Carbamidomethyl(C)@4; Carbamidomethyl(C)@13; Oxidation(M)@14; Oxidation(M)@16		0.00252095	2137.82	713.614	2137.82	713.613	3	19
1	167.84	57.1	P02760	AMBP_HUMAN	Protein AMBP OS=Homo sapiens GN=AMBP PE=1 SV=1	0	99	EDSCQLGYSAGPCMGMTSR	Carbamidomethyl(C)@4; Carbamidomethyl(C)@13; Oxidation(M)@14; Dioxidation(M)@16		-0.000142579	2153.81	718.945	2153.81	718.945	3	20
1	167.84	57.1	P02760	AMBP_HUMAN	Protein AMBP OS=Homo sapiens GN=AMBP PE=1 SV=1	0	99	EDSCQLGYSAGPCMGMTSR	Carbamidomethyl(C)@4; Carbamidomethyl(C)@13; Oxidation(M)@14		0.00408533	2121.83	708.283	2121.82	708.281	3	22
1	167.84	57.1	P02760	AMBP_HUMAN	Protein AMBP OS=Homo sapiens GN=AMBP PE=1 SV=1	0	99	EDSCQLGYSAGPCMGMTSR	Carbamidomethyl(C)@4; Carbamidomethyl(C)@13; Oxidation(M)@16; Cation:Na@C-term		0.00260598	2143.81	715.61	2143.8	715.609	3	17
1	167.84	57.1	P02760	AMBP_HUMAN	Protein AMBP OS=Homo sapiens GN=AMBP PE=1 SV=1	0	99	EDSCQLGYSAGPCMGMTSR	Carbamidomethyl(C)@4; Carbamidomethyl(C)@13; Oxidation(M)@14		0.00408533	2121.83	708.283	2121.82	708.281	3	23
1	167.84	57.1	P02760	AMBP_HUMAN	Protein AMBP OS=Homo sapiens GN=AMBP PE=1 SV=1	0	99	EDSCQLGYSAGPCMGMTSR	Cation:Na(E)@1; Carbamidomethyl(C)@4; Carbamidomethyl(C)@13; Oxidation(M)@14		0.00260598	2143.81	715.61	2143.8	715.609	3	11
1	167.84	57.1	P02760	AMBP_HUMAN	Protein AMBP OS=Homo sapiens GN=AMBP PE=1 SV=1	0	99	EDSCQLGYSAGPCMGMTSR	Carbamidomethyl(C)@4; Carbamidomethyl(C)@13; Oxidation(M)@14		0.00408533	2121.83	708.283	2121.82	708.281	3	22
1	167.84	57.1	P02760	AMBP_HUMAN	Protein AMBP OS=Homo sapiens GN=AMBP PE=1 SV=1	0	99	EDSCQLGYSAGPCMGMTSR	Cation:Na(E)@1; Carbamidomethyl(C)@4; Carbamidomethyl(C)@13; Oxidation(M)@16		0.00681736	2143.81	715.611	2143.8	715.609	3	14
1	167.84	57.1	P02760	AMBP_HUMAN	Protein AMBP OS=Homo sapiens GN=AMBP PE=1 SV=1	0	99	EDSCQLGYSAGPCMGMTSR	Carbamidomethyl(C)@4; Carbamidomethyl(C)@13; Oxidation(M)@16		0.00371913	2121.83	708.283	2121.82	708.281	3	24
1	167.84	57.1	P02760	AMBP_HUMAN	Protein AMBP OS=Homo sapiens GN=AMBP PE=1 SV=1	0	99	EDSCQLGYSAGPCMGMTSR	Carbamidomethyl(C)@4; Carbamidomethyl(C)@13; Oxidation(M)@16		0.00371913	2121.83	708.283	2121.82	708.281	3	20
1	167.84	57.1	P02760	AMBP_HUMAN	Protein AMBP OS=Homo sapiens GN=AMBP PE=1 SV=1	0	99	EDSCQLGYSAGPCMGMTSR	Carbamidomethyl(C)@4; Carbamidomethyl(C)@13		0.00400127	2105.83	702.951	2105.83	702.95	3	22
1	167.84	57.1	P02760	AMBP_HUMAN	Protein AMBP OS=Homo sapiens GN=AMBP PE=1 SV=1	0	99	EDSCQLGYSAGPCMGMTSR	Cation:Na(D)@2; Carbamidomethyl(C)@4; Carbamidomethyl(C)@13		0.00728332	2127.82	710.279	2127.81	710.277	3	17
1	167.84	57.1	P02760	AMBP_HUMAN	Protein AMBP OS=Homo sapiens GN=AMBP PE=1 SV=1	0	99	EDSCQLGYSAGPCMGMTSR	Carbamidomethyl(C)@4; Carbamidomethyl(C)@13		0.00400127	2105.83	702.951	2105.83	702.95	3	22
1	167.84	57.1	P02760	AMBP_HUMAN	Protein AMBP OS=Homo sapiens GN=AMBP PE=1 SV=1	0	99	EDSCQLGYSAGPCMGMTSR	Carbamidomethyl(C)@4; Carbamidomethyl(C)@13		0.00436748	2105.83	702.951	2105.83	702.95	3	19
1	167.84	57.1	P02760	AMBP_HUMAN	Protein AMBP OS=Homo sapiens GN=AMBP PE=1 SV=1	0	99	EDSCQLGYSAGPCMGMTSR	Carbamidomethyl(C)@4; Carbamidomethyl(C)@13; Oxidation(M)@14; Oxidation(M)@16		0.00406786	2137.82	713.614	2137.82	713.613	3	20
1	167.84	57.1	P02760	AMBP_HUMAN	Protein AMBP OS=Homo sapiens GN=AMBP PE=1 SV=1	0	99	EDSCQLGYSAGPCMGMTSR	Carbamidomethyl(C)@4; Carbamidomethyl(C)@13; Oxidation(M)@14; Oxidation(M)@16		-0.00374228	2137.81	1069.91	2137.82	1069.92	2	20
1	167.84	57.1	P02760	AMBP_HUMAN	Protein AMBP OS=Homo sapiens GN=AMBP PE=1 SV=1	0	99	EDSCQLGYSAGPCMGMTSR	Carbamidomethyl(C)@4; Carbamidomethyl(C)@13; Oxidation(M)@14; Oxidation(M)@16		0.00406786	2137.82	713.614	2137.82	713.613	3	21
1	167.84	57.1	P02760	AMBP_HUMAN	Protein AMBP OS=Homo sapiens GN=AMBP PE=1 SV=1	0	99	EDSCQLGYSAGPCMGMTSR	Carbamidomethyl(C)@4; Carbamidomethyl(C)@13; Oxidation(M)@14; Oxidation(M)@16		0.00406786	2137.82	713.614	2137.82	713.613	3	18
1	167.84	57.1	P02760	AMBP_HUMAN	Protein AMBP OS=Homo sapiens GN=AMBP PE=1 SV=1	0	99	EDSCQLGYSAGPCMGMTSR	Carbamidomethyl(C)@4; Carbamidomethyl(C)@13; Oxidation(M)@14; Oxidation(M)@16		0.00260302	2137.82	713.614	2137.82	713.613	3	20
1	167.84	57.1	P02760	AMBP_HUMAN	Protein AMBP OS=Homo sapiens GN=AMBP PE=1 SV=1	0	99	EDSCQLGYSAGPCMGMTSR	Carbamidomethyl(C)@4; Carbamidomethyl(C)@13; Oxidation(M)@14; Oxidation(M)@16		0.00260302	2137.82	713.614	2137.82	713.613	3	20
1	167.84	57.1	P02760	AMBP_HUMAN	Protein AMBP OS=Homo sapiens GN=AMBP PE=1 SV=1	0	99	EDSCQLGYSAGPCMGMTSR	Carbamidomethyl(C)@4; Carbamidomethyl(C)@13; Oxidation(M)@14; Dioxidation(M)@16		-0.00454044	2153.81	718.943	2153.81	718.945	3	20
1	167.84	57.1	P02760	AMBP_HUMAN	Protein AMBP OS=Homo sapiens GN=AMBP PE=1 SV=1	0	99	EDSCQLGYSAGPCMGMTSR	Carbamidomethyl(C)@4; Carbamidomethyl(C)@13; Oxidation(M)@14; Carbamyl(M)@16		0.00566293	2164.83	722.619	2164.83	722.617	3	19
1	167.84	57.1	P02760	AMBP_HUMAN	Protein AMBP OS=Homo sapiens GN=AMBP PE=1 SV=1	0	99	EDSCQLGYSAGPCMGMTSR	Carbamidomethyl(C)@4; Carbamidomethyl(C)@13; Oxidation(M)@14; Dioxidation(M)@16		-0.00454044	2153.81	718.943	2153.81	718.945	3	20
1	167.84	57.1	P02760	AMBP_HUMAN	Protein AMBP OS=Homo sapiens GN=AMBP PE=1 SV=1	0	99	EDSCQLGYSAGPCMGMTSR	Carbamidomethyl(C)@4; Carbamidomethyl(C)@13; Oxidation(M)@14; Oxidation(M)@16		0.00278612	2137.82	713.614	2137.82	713.613	3	19
1	167.84	57.1	P02760	AMBP_HUMAN	Protein AMBP OS=Homo sapiens GN=AMBP PE=1 SV=1	0	99	EDSCQLGYSAGPCMGMTSR	Carbamidomethyl(C)@4; Carbamidomethyl(C)@13; Oxidation(M)@14; Oxidation(M)@16		0.00772995	2137.82	713.616	2137.82	713.613	3	21
1	167.84	57.1	P02760	AMBP_HUMAN	Protein AMBP OS=Homo sapiens GN=AMBP PE=1 SV=1	0	99	EDSCQLGYSAGPCMGMTSR	Carbamidomethyl(C)@4; Carbamidomethyl(C)@13; Oxidation(M)@14; Oxidation(M)@16		0.00315233	2137.82	713.614	2137.82	713.613	3	20
1	167.84	57.1	P02760	AMBP_HUMAN	Protein AMBP OS=Homo sapiens GN=AMBP PE=1 SV=1	0	99	EDSCQLGYSAGPCMGMTSR	Carbamidomethyl(C)@4; Carbamidomethyl(C)@13; Oxidation(M)@14; Oxidation(M)@16		0.00370165	2137.82	713.614	2137.82	713.613	3	18
1	167.84	57.1	P02760	AMBP_HUMAN	Protein AMBP OS=Homo sapiens GN=AMBP PE=1 SV=1	0	99	EDSCQLGYSAGPCMGMTSR	Carbamidomethyl(C)@4; Carbamidomethyl(C)@13; Oxidation(M)@14; Oxidation(M)@16		-0.00160838	2137.82	713.612	2137.82	713.613	3	19
1	167.84	57.1	P02760	AMBP_HUMAN	Protein AMBP OS=Homo sapiens GN=AMBP PE=1 SV=1	0	99	EDSCQLGYSAGPCMGMTSR	Carbamidomethyl(C)@4; Carbamidomethyl(C)@13; Oxidation(M)@14		0.00553475	2121.83	708.283	2121.82	708.281	3	20
1	167.84	57.1	P02760	AMBP_HUMAN	Protein AMBP OS=Homo sapiens GN=AMBP PE=1 SV=1	0	99	EDSCQLGYSAGPCMGMTSR	Carbamidomethyl(C)@4; Carbamidomethyl(C)@13; Oxidation(M)@14; Oxidation(M)@16		-0.00160838	2137.82	713.612	2137.82	713.613	3	18
1	167.84	57.1	P02760	AMBP_HUMAN	Protein AMBP OS=Homo sapiens GN=AMBP PE=1 SV=1	0	99	EDSCQLGYSAGPCMGMTSR	Carbamidomethyl(C)@4; Carbamidomethyl(C)@13; Oxidation(M)@14		0.00553475	2121.83	708.283	2121.82	708.281	3	23
1	167.84	57.1	P02760	AMBP_HUMAN	Protein AMBP OS=Homo sapiens GN=AMBP PE=1 SV=1	0	99	EDSCQLGYSAGPCMGMTSR	Carbamidomethyl(C)@4; Carbamidomethyl(C)@13; Oxidation(M)@14		0.00553475	2121.83	708.283	2121.82	708.281	3	23
1	167.84	57.1	P02760	AMBP_HUMAN	Protein AMBP OS=Homo sapiens GN=AMBP PE=1 SV=1	0	99	EDSCQLGYSAGPCMGMTSR	Carbamidomethyl(C)@4; Carbamidomethyl(C)@13; Oxidation(M)@16		4.16179e-05	2121.82	708.281	2121.82	708.281	3	22
1	167.84	57.1	P02760	AMBP_HUMAN	Protein AMBP OS=Homo sapiens GN=AMBP PE=1 SV=1	0	99	EDSCQLGYSAGPCMGMTSR	Carbamidomethyl(C)@4; Carbamidomethyl(C)@13; Oxidation(M)@16		4.16179e-05	2121.82	708.281	2121.82	708.281	3	22
1	167.84	57.1	P02760	AMBP_HUMAN	Protein AMBP OS=Homo sapiens GN=AMBP PE=1 SV=1	0	99	EDSCQLGYSAGPCMGMTSR	Carbamidomethyl(C)@4; Carbamidomethyl(C)@13; Oxidation(M)@16		0.00571786	2121.83	708.283	2121.82	708.281	3	19
1	167.84	57.1	P02760	AMBP_HUMAN	Protein AMBP OS=Homo sapiens GN=AMBP PE=1 SV=1	0	99	EDSCQLGYSAGPCMGMTSR	Glu->pyro-Glu@N-term; Carbamidomethyl(C)@4; Carbamidomethyl(C)@13; Oxidation(M)@14; Oxidation(M)@16		0.00996471	2119.82	707.613	2119.81	707.609	3	21
1	167.84	57.1	P02760	AMBP_HUMAN	Protein AMBP OS=Homo sapiens GN=AMBP PE=1 SV=1	0	99	EDSCQLGYSAGPCMGMTSR	Carbamidomethyl(C)@4; Carbamidomethyl(C)@13; Carbamyl(M)@16		0.00493312	2148.84	717.287	2148.83	717.285	3	18
1	167.84	57.1	P02760	AMBP_HUMAN	Protein AMBP OS=Homo sapiens GN=AMBP PE=1 SV=1	0	99	EDSCQLGYSAGPCMGMTSR	Carbamidomethyl(C)@4; Carbamidomethyl(C)@13; Oxidation(M)@14		0.000957141	2121.82	708.282	2121.82	708.281	3	20
1	167.84	57.1	P02760	AMBP_HUMAN	Protein AMBP OS=Homo sapiens GN=AMBP PE=1 SV=1	0	99	EDSCQLGYSAGPCMGMTSR	Carbamidomethyl(C)@4; Carbamidomethyl(C)@13; Oxidation(M)@16		-0.00105701	2121.82	708.281	2121.82	708.281	3	20
1	167.84	57.1	P02760	AMBP_HUMAN	Protein AMBP OS=Homo sapiens GN=AMBP PE=1 SV=1	0	99	EDSCQLGYSAGPCMGMTSR	Carbamidomethyl(C)@4; Carbamidomethyl(C)@13; Oxidation(M)@14		0.000407827	2121.82	708.282	2121.82	708.281	3	22
1	167.84	57.1	P02760	AMBP_HUMAN	Protein AMBP OS=Homo sapiens GN=AMBP PE=1 SV=1	0	99	EDSCQLGYSAGPCMGMTSR	Carbamidomethyl(C)@4; Carbamidomethyl(C)@13; Oxidation(M)@14		0.000590932	2121.82	708.282	2121.82	708.281	3	22
1	167.84	57.1	P02760	AMBP_HUMAN	Protein AMBP OS=Homo sapiens GN=AMBP PE=1 SV=1	0	99	EDSCQLGYSAGPCMGMTSR	Carbamidomethyl(C)@4; Carbamidomethyl(C)@13; Oxidation(M)@16		4.16179e-05	2121.82	708.281	2121.82	708.281	3	19
1	167.84	57.1	P02760	AMBP_HUMAN	Protein AMBP OS=Homo sapiens GN=AMBP PE=1 SV=1	0	99	EDSCQLGYSAGPCMGMTSR	Carbamidomethyl(C)@4; Carbamidomethyl(C)@13; Oxidation(M)@16		0.00608407	2121.83	708.283	2121.82	708.281	3	20
1	167.84	57.1	P02760	AMBP_HUMAN	Protein AMBP OS=Homo sapiens GN=AMBP PE=1 SV=1	0	99	EDSCQLGYSAGPCMGMTSR	Carbamidomethyl(C)@4; Carbamidomethyl(C)@13; Oxidation(M)@14		0.000590932	2121.82	708.282	2121.82	708.281	3	20
1	167.84	57.1	P02760	AMBP_HUMAN	Protein AMBP OS=Homo sapiens GN=AMBP PE=1 SV=1	0	99	EDSCQLGYSAGPCMGMTSR	Carbamidomethyl(C)@4; Carbamidomethyl(C)@13; Oxidation(M)@14		0.000590932	2121.82	708.282	2121.82	708.281	3	22
1	167.84	57.1	P02760	AMBP_HUMAN	Protein AMBP OS=Homo sapiens GN=AMBP PE=1 SV=1	0	99	EDSCQLGYSAGPCMGMTSR	Carbamidomethyl(C)@4; Carbamidomethyl(C)@13		-2.01356	2103.81	702.279	2105.83	702.95	3	16
1	167.84	57.1	P02760	AMBP_HUMAN	Protein AMBP OS=Homo sapiens GN=AMBP PE=1 SV=1	0	99	EDSCQLGYSAGPCMGMTSR	Carbamidomethyl(C)@4; Carbamidomethyl(C)@13		0.00535338	2105.83	702.952	2105.83	702.95	3	23
1	167.84	57.1	P02760	AMBP_HUMAN	Protein AMBP OS=Homo sapiens GN=AMBP PE=1 SV=1	0	99	EDSCQLGYSAGPCMGMTSR	Carbamidomethyl(C)@4; Carbamidomethyl(C)@13; Oxidation(M)@14		0.00461923	2121.83	708.283	2121.82	708.281	3	19
1	167.84	57.1	P02760	AMBP_HUMAN	Protein AMBP OS=Homo sapiens GN=AMBP PE=1 SV=1	0	99	EDSCQLGYSAGPCMGMTSR	Cation:Na(D)@2; Carbamidomethyl(C)@4; Carbamidomethyl(C)@13		-0.00111841	2127.81	710.277	2127.81	710.277	3	16
1	167.84	57.1	P02760	AMBP_HUMAN	Protein AMBP OS=Homo sapiens GN=AMBP PE=1 SV=1	0	99	EDSCQLGYSAGPCMGMTSR	Carbamidomethyl(C)@4; Carbamidomethyl(C)@13		1.00309	2106.83	703.284	2105.83	702.95	3	22
1	167.84	57.1	P02760	AMBP_HUMAN	Protein AMBP OS=Homo sapiens GN=AMBP PE=1 SV=1	0	99	EDSCQLGYSAGPCMGMTSR	Carbamidomethyl(C)@4; Carbamidomethyl(C)@13; Oxidation(M)@14		0.00461923	2121.83	708.283	2121.82	708.281	3	18
1	167.84	57.1	P02760	AMBP_HUMAN	Protein AMBP OS=Homo sapiens GN=AMBP PE=1 SV=1	0	99	EDSCQLGYSAGPCMGMTSR	Carbamidomethyl(C)@4; Carbamidomethyl(C)@13		-0.00224152	2105.83	1053.92	2105.83	1053.92	2	22
1	167.84	57.1	P02760	AMBP_HUMAN	Protein AMBP OS=Homo sapiens GN=AMBP PE=1 SV=1	0	99	EDSCQLGYSAGPCMGMTSR	Carbamidomethyl(C)@4; Carbamidomethyl(C)@13		0.00535338	2105.83	702.952	2105.83	702.95	3	23
1	167.84	57.1	P02760	AMBP_HUMAN	Protein AMBP OS=Homo sapiens GN=AMBP PE=1 SV=1	0	99	EDSCQLGYSAGPCMGMTSR	Carbamidomethyl(C)@4; Carbamidomethyl(C)@13		0.00498717	2105.83	702.951	2105.83	702.95	3	19
1	167.84	57.1	P02760	AMBP_HUMAN	Protein AMBP OS=Homo sapiens GN=AMBP PE=1 SV=1	0	99	EDSCQLGYSAGPCMGMTSR	Glu->pyro-Glu@N-term; Carbamidomethyl(C)@4; Carbamidomethyl(C)@13; Oxidation(M)@14		-0.000287458	2103.81	702.278	2103.81	702.278	3	24
1	167.84	57.1	P02760	AMBP_HUMAN	Protein AMBP OS=Homo sapiens GN=AMBP PE=1 SV=1	0	99	EDSCQLGYSAGPCMGMTSR	Carbamidomethyl(C)@4; Carbamidomethyl(C)@13		-0.000689069	2105.83	702.949	2105.83	702.95	3	19
1	167.84	57.1	P02760	AMBP_HUMAN	Protein AMBP OS=Homo sapiens GN=AMBP PE=1 SV=1	0	99	EDSCQLGYSAGPCMGMTSR	Glu->pyro-Glu@N-term; Carbamidomethyl(C)@4; Carbamidomethyl(C)@13		0.00758739	2087.82	696.949	2087.82	696.946	3	19
1	167.84	57.1	P02760	AMBP_HUMAN	Protein AMBP OS=Homo sapiens GN=AMBP PE=1 SV=1	0	99	EDSCQLGYSAGPCMGMTSR	Carbamidomethyl(C)@4; Carbamidomethyl(C)@13; Oxidation(M)@14; Oxidation(M)@16		0.00311853	2137.82	713.614	2137.82	713.613	3	22
1	167.84	57.1	P02760	AMBP_HUMAN	Protein AMBP OS=Homo sapiens GN=AMBP PE=1 SV=1	0	99	EDSCQLGYSAGPCMGMTSR	Carbamidomethyl(C)@4; Carbamidomethyl(C)@13; Oxidation(M)@14; Oxidation(M)@16		-0.00492047	2137.81	1069.91	2137.82	1069.92	2	17
1	167.84	57.1	P02760	AMBP_HUMAN	Protein AMBP OS=Homo sapiens GN=AMBP PE=1 SV=1	0	99	EDSCQLGYSAGPCMGMTSR	Cation:Na(E)@1; Carbamidomethyl(C)@4; Carbamidomethyl(C)@13; Oxidation(M)@14; Oxidation(M)@16		0.00186042	2159.8	720.941	2159.8	720.94	3	13
1	167.84	57.1	P02760	AMBP_HUMAN	Protein AMBP OS=Homo sapiens GN=AMBP PE=1 SV=1	0	99	EDSCQLGYSAGPCMGMTSR	Carbamidomethyl(C)@4; Carbamidomethyl(C)@13; Oxidation(M)@14; Oxidation(M)@16		0.00311853	2137.82	713.614	2137.82	713.613	3	22
1	167.84	57.1	P02760	AMBP_HUMAN	Protein AMBP OS=Homo sapiens GN=AMBP PE=1 SV=1	0	99	EDSCQLGYSAGPCMGMTSR	Carbamidomethyl(C)@4; Carbamidomethyl(C)@13; Oxidation(M)@14; Oxidation(M)@16		0.00311853	2137.82	713.614	2137.82	713.613	3	17
1	167.84	57.1	P02760	AMBP_HUMAN	Protein AMBP OS=Homo sapiens GN=AMBP PE=1 SV=1	0	99	EDSCQLGYSAGPCMGMTSR	Carbamidomethyl(C)@4; Carbamidomethyl(C)@13; Oxidation(M)@14; Oxidation(M)@16		0.00696367	2137.82	713.615	2137.82	713.613	3	20
1	167.84	57.1	P02760	AMBP_HUMAN	Protein AMBP OS=Homo sapiens GN=AMBP PE=1 SV=1	0	99	EDSCQLGYSAGPCMGMTSR	Carbamidomethyl(C)@4; Carbamidomethyl(C)@13; Oxidation(M)@14; Oxidation(M)@16		-0.00164213	2137.82	713.612	2137.82	713.613	3	20
1	167.84	57.1	P02760	AMBP_HUMAN	Protein AMBP OS=Homo sapiens GN=AMBP PE=1 SV=1	0	99	EDSCQLGYSAGPCMGMTSR	Carbamidomethyl(C)@4; Deamidated(Q)@5; Carbamidomethyl(C)@13; Oxidation(M)@14; Oxidation(M)@16		0.0124324	2138.81	713.945	2138.8	713.941	3	18
1	167.84	57.1	P02760	AMBP_HUMAN	Protein AMBP OS=Homo sapiens GN=AMBP PE=1 SV=1	0	99	EDSCQLGYSAGPCMGMTSR	Carbamidomethyl(C)@4; Carbamidomethyl(C)@13; Carbamyl(M)@14; Oxidation(M)@16		0.000525981	2164.83	722.617	2164.83	722.617	3	17
1	167.84	57.1	P02760	AMBP_HUMAN	Protein AMBP OS=Homo sapiens GN=AMBP PE=1 SV=1	0	99	EDSCQLGYSAGPCMGMTSR	Carbamidomethyl(C)@4; Carbamidomethyl(C)@13; Oxidation(M)@14; Dioxidation(M)@16		-0.0011147	2153.81	718.944	2153.81	718.945	3	22
1	167.84	57.1	P02760	AMBP_HUMAN	Protein AMBP OS=Homo sapiens GN=AMBP PE=1 SV=1	0	99	EDSCQLGYSAGPCMGMTSR	Carbamidomethyl(C)@4; Carbamidomethyl(C)@13; Oxidation(M)@14; Dioxidation(M)@16		-0.0011147	2153.81	718.944	2153.81	718.945	3	19
1	167.84	57.1	P02760	AMBP_HUMAN	Protein AMBP OS=Homo sapiens GN=AMBP PE=1 SV=1	0	99	EDSCQLGYSAGPCMGMTSR	Carbamidomethyl(C)@4; Carbamidomethyl(C)@13; Oxidation(M)@14; Oxidation(M)@16		0.00201991	2137.82	713.614	2137.82	713.613	3	21
1	167.84	57.1	P02760	AMBP_HUMAN	Protein AMBP OS=Homo sapiens GN=AMBP PE=1 SV=1	0	99	EDSCQLGYSAGPCMGMTSR	Carbamidomethyl(C)@4; Carbamidomethyl(C)@13; Oxidation(M)@14; Oxidation(M)@16		0.00311853	2137.82	713.614	2137.82	713.613	3	20
1	167.84	57.1	P02760	AMBP_HUMAN	Protein AMBP OS=Homo sapiens GN=AMBP PE=1 SV=1	0	99	EDSCQLGYSAGPCMGMTSR	Carbamidomethyl(C)@4; Carbamidomethyl(C)@13; Oxidation(M)@14; Oxidation(M)@16		0.00769608	2137.82	713.616	2137.82	713.613	3	20
1	167.84	57.1	P02760	AMBP_HUMAN	Protein AMBP OS=Homo sapiens GN=AMBP PE=1 SV=1	0	99	EDSCQLGYSAGPCMGMTSR	Carbamidomethyl(C)@4; Carbamidomethyl(C)@13; Oxidation(M)@14; Oxidation(M)@16		0.00165371	2137.82	713.614	2137.82	713.613	3	19
1	167.84	57.1	P02760	AMBP_HUMAN	Protein AMBP OS=Homo sapiens GN=AMBP PE=1 SV=1	0	99	EDSCQLGYSAGPCMGMTSR	Carbamidomethyl(C)@4; Carbamidomethyl(C)@13; Oxidation(M)@14; Oxidation(M)@16		0.00293542	2137.82	713.614	2137.82	713.613	3	21
1	167.84	57.1	P02760	AMBP_HUMAN	Protein AMBP OS=Homo sapiens GN=AMBP PE=1 SV=1	0	99	EDSCQLGYSAGPCMGMTSR	Carbamidomethyl(C)@4; Carbamidomethyl(C)@13; Oxidation(M)@14; Oxidation(M)@16		0.00165371	2137.82	713.614	2137.82	713.613	3	20
1	167.84	57.1	P02760	AMBP_HUMAN	Protein AMBP OS=Homo sapiens GN=AMBP PE=1 SV=1	0	99	EDSCQLGYSAGPCMGMTSR	Carbamidomethyl(C)@4; Carbamidomethyl(C)@13; Oxidation(M)@14		0.00387192	2121.83	708.283	2121.82	708.281	3	22
1	167.84	57.1	P02760	AMBP_HUMAN	Protein AMBP OS=Homo sapiens GN=AMBP PE=1 SV=1	0	99	EDSCQLGYSAGPCMGMTSR	Carbamidomethyl(C)@4; Carbamidomethyl(C)@13; Oxidation(M)@14; Oxidation(M)@16		-0.00255764	2137.81	713.612	2137.82	713.613	3	21
1	167.84	57.1	P02760	AMBP_HUMAN	Protein AMBP OS=Homo sapiens GN=AMBP PE=1 SV=1	0	99	EDSCQLGYSAGPCMGMTSR	Carbamidomethyl(C)@4; Carbamidomethyl(C)@13; Oxidation(M)@16; Cation:Na@C-term		-0.00324423	2143.8	715.608	2143.8	715.609	3	15
1	167.84	57.1	P02760	AMBP_HUMAN	Protein AMBP OS=Homo sapiens GN=AMBP PE=1 SV=1	0	99	EDSCQLGYSAGPCMGMTSR	Carbamidomethyl(C)@4; Carbamidomethyl(C)@13; Oxidation(M)@14		0.00387192	2121.83	708.283	2121.82	708.281	3	25
1	167.84	57.1	P02760	AMBP_HUMAN	Protein AMBP OS=Homo sapiens GN=AMBP PE=1 SV=1	0	99	EDSCQLGYSAGPCMGMTSR	Carbamidomethyl(C)@4; Deamidated(Q)@5; Carbamidomethyl(C)@13; Oxidation(M)@14		0.017031	2122.82	708.615	2122.81	708.609	3	18
1	167.84	57.1	P02760	AMBP_HUMAN	Protein AMBP OS=Homo sapiens GN=AMBP PE=1 SV=1	0	99	EDSCQLGYSAGPCMGMTSR	Carbamidomethyl(C)@4; Carbamidomethyl(C)@13; Oxidation(M)@16; Cation:Na@C-term		-0.00324423	2143.8	715.608	2143.8	715.609	3	19
1	167.84	57.1	P02760	AMBP_HUMAN	Protein AMBP OS=Homo sapiens GN=AMBP PE=1 SV=1	0	99	EDSCQLGYSAGPCMGMTSR	Carbamidomethyl(C)@4; Pro->pyro-Glu(P)@12; Carbamidomethyl(C)@13; Oxidation(M)@14		0.0299124	2135.83	712.951	2135.8	712.941	3	18
1	167.84	57.1	P02760	AMBP_HUMAN	Protein AMBP OS=Homo sapiens GN=AMBP PE=1 SV=1	0	99	EDSCQLGYSAGPCMGMTSR	Carbamidomethyl(C)@4; Carbamidomethyl(C)@13; Oxidation(M)@14		0.00387192	2121.83	708.283	2121.82	708.281	3	21
1	167.84	57.1	P02760	AMBP_HUMAN	Protein AMBP OS=Homo sapiens GN=AMBP PE=1 SV=1	0	99	EDSCQLGYSAGPCMGMTSR	Carbamidomethyl(C)@4; Carbamidomethyl(C)@13; Cation:K@C-term		0.0175501	2143.8	715.608	2143.78	715.602	3	17
1	167.84	57.1	P02760	AMBP_HUMAN	Protein AMBP OS=Homo sapiens GN=AMBP PE=1 SV=1	0	99	EDSCQLGYSAGPCMGMTSR	Carbamidomethyl(C)@4; Carbamidomethyl(C)@13; Oxidation(M)@16		0.00332261	2121.83	708.283	2121.82	708.281	3	23
1	167.84	57.1	P02760	AMBP_HUMAN	Protein AMBP OS=Homo sapiens GN=AMBP PE=1 SV=1	0	99	EDSCQLGYSAGPCMGMTSR	Carbamidomethyl(C)@4; Carbamidomethyl(C)@13; Oxidation(M)@16		0.00332261	2121.83	708.283	2121.82	708.281	3	21
1	167.84	57.1	P02760	AMBP_HUMAN	Protein AMBP OS=Homo sapiens GN=AMBP PE=1 SV=1	0	99	EDSCQLGYSAGPCMGMTSR	Carbamidomethyl(C)@4; Carbamidomethyl(C)@13; Oxidation(M)@14		-0.00656491	2121.82	708.279	2121.82	708.281	3	21
1	167.84	57.1	P02760	AMBP_HUMAN	Protein AMBP OS=Homo sapiens GN=AMBP PE=1 SV=1	0	99	EDSCQLGYSAGPCMGMTSR	Glu->pyro-Glu@N-term; Carbamidomethyl(C)@4; Carbamidomethyl(C)@13; Oxidation(M)@14; Oxidation(M)@16		0.0053976	2119.81	707.611	2119.81	707.609	3	20
1	167.84	57.1	P02760	AMBP_HUMAN	Protein AMBP OS=Homo sapiens GN=AMBP PE=1 SV=1	0	99	EDSCQLGYSAGPCMGMTSR	Glu->pyro-Glu@N-term; Carbamidomethyl(C)@4; Deamidated(Q)@5; Carbamidomethyl(C)@13; Oxidation(M)@14; Oxidation(M)@16		0.0214863	2120.81	707.945	2120.79	707.938	3	14
1	167.84	57.1	P02760	AMBP_HUMAN	Protein AMBP OS=Homo sapiens GN=AMBP PE=1 SV=1	0	99	EDSCQLGYSAGPCMGMTSR	Carbamidomethyl(C)@4; Carbamidomethyl(C)@13; Oxidation(M)@14		0.00332261	2121.83	708.283	2121.82	708.281	3	19
1	167.84	57.1	P02760	AMBP_HUMAN	Protein AMBP OS=Homo sapiens GN=AMBP PE=1 SV=1	0	99	EDSCQLGYSAGPCMGMTSR	Carbamidomethyl(C)@4; Carbamidomethyl(C)@13; Oxidation(M)@16		2.67745e-05	2121.82	708.281	2121.82	708.281	3	19
1	167.84	57.1	P02760	AMBP_HUMAN	Protein AMBP OS=Homo sapiens GN=AMBP PE=1 SV=1	0	99	EDSCQLGYSAGPCMGMTSR	Carbamidomethyl(C)@4; Carbamidomethyl(C)@13; Oxidation(M)@16		0.00350572	2121.83	708.283	2121.82	708.281	3	20
1	167.84	57.1	P02760	AMBP_HUMAN	Protein AMBP OS=Homo sapiens GN=AMBP PE=1 SV=1	0	99	EDSCQLGYSAGPCMGMTSR	Carbamidomethyl(C)@4; Carbamidomethyl(C)@13; Oxidation(M)@14		0.00350572	2121.83	708.283	2121.82	708.281	3	22
1	167.84	57.1	P02760	AMBP_HUMAN	Protein AMBP OS=Homo sapiens GN=AMBP PE=1 SV=1	0	99	EDSCQLGYSAGPCMGMTSR	Carbamidomethyl(C)@4; Carbamidomethyl(C)@13; Oxidation(M)@14		-0.00033943	2121.82	708.281	2121.82	708.281	3	21
1	167.84	57.1	P02760	AMBP_HUMAN	Protein AMBP OS=Homo sapiens GN=AMBP PE=1 SV=1	0	99	EDSCQLGYSAGPCMGMTSR	Carbamidomethyl(C)@4; Carbamidomethyl(C)@13; Oxidation(M)@16		0.00680156	2121.83	708.284	2121.82	708.281	3	22
1	167.84	57.1	P02760	AMBP_HUMAN	Protein AMBP OS=Homo sapiens GN=AMBP PE=1 SV=1	0	99	EDSCQLGYSAGPCMGMTSR	Carbamidomethyl(C)@4; Carbamidomethyl(C)@13; Oxidation(M)@16		0.00387192	2121.83	708.283	2121.82	708.281	3	20
1	167.84	57.1	P02760	AMBP_HUMAN	Protein AMBP OS=Homo sapiens GN=AMBP PE=1 SV=1	0	99	EDSCQLGYSAGPCMGMTSR	Carbamidomethyl(C)@4; Carbamidomethyl(C)@13; Oxidation(M)@14		-0.000705634	2121.82	708.281	2121.82	708.281	3	21
1	167.84	57.1	P02760	AMBP_HUMAN	Protein AMBP OS=Homo sapiens GN=AMBP PE=1 SV=1	0	99	EDSCQLGYSAGPCMGMTSR	Carbamidomethyl(C)@4; Carbamidomethyl(C)@13; Oxidation(M)@16		-0.000705634	2121.82	708.281	2121.82	708.281	3	19
1	167.84	57.1	P02760	AMBP_HUMAN	Protein AMBP OS=Homo sapiens GN=AMBP PE=1 SV=1	0	99	EDSCQLGYSAGPCMGMTSR	Carbamidomethyl(C)@4; Carbamidomethyl(C)@13		0.00517372	2105.83	702.952	2105.83	702.95	3	22
1	167.84	57.1	P02760	AMBP_HUMAN	Protein AMBP OS=Homo sapiens GN=AMBP PE=1 SV=1	0	99	EDSCQLGYSAGPCMGMTSR	Carbamidomethyl(C)@4; Carbamidomethyl(C)@13; Oxidation(M)@14		0.00387192	2121.83	708.283	2121.82	708.281	3	17
1	167.84	57.1	P02760	AMBP_HUMAN	Protein AMBP OS=Homo sapiens GN=AMBP PE=1 SV=1	0	99	EDSCQLGYSAGPCMGMTSR	Cation:Na(D)@2; Carbamidomethyl(C)@4; Carbamidomethyl(C)@13		-0.00212429	2127.81	710.276	2127.81	710.277	3	15
1	167.84	57.1	P02760	AMBP_HUMAN	Protein AMBP OS=Homo sapiens GN=AMBP PE=1 SV=1	0	99	EDSCQLGYSAGPCMGMTSR	Carbamidomethyl(C)@4; Carbamidomethyl(C)@13		0.00517372	2105.83	702.952	2105.83	702.95	3	23
1	167.84	57.1	P02760	AMBP_HUMAN	Protein AMBP OS=Homo sapiens GN=AMBP PE=1 SV=1	0	99	EDSCQLGYSAGPCMGMTSR	Cation:Na(D)@2; Carbamidomethyl(C)@4; Carbamidomethyl(C)@13		-0.00212429	2127.81	710.276	2127.81	710.277	3	17
1	167.84	57.1	P02760	AMBP_HUMAN	Protein AMBP OS=Homo sapiens GN=AMBP PE=1 SV=1	0	99	EDSCQLGYSAGPCMGMTSR	Carbamidomethyl(C)@4; Pro->pyro-Glu(P)@12; Carbamidomethyl(C)@13		0.0374405	2119.84	707.622	2119.81	707.609	3	15
1	167.84	57.1	P02760	AMBP_HUMAN	Protein AMBP OS=Homo sapiens GN=AMBP PE=1 SV=1	0	99	EDSCQLGYSAGPCMGMTSR	Carbamidomethyl(C)@4; Carbamidomethyl(C)@13		0.00517372	2105.83	702.952	2105.83	702.95	3	23
1	167.84	57.1	P02760	AMBP_HUMAN	Protein AMBP OS=Homo sapiens GN=AMBP PE=1 SV=1	0	99	EDSCQLGYSAGPCMGMTSR	Glu->pyro-Glu@N-term; Carbamidomethyl(C)@4; Carbamidomethyl(C)@13; Oxidation(M)@14		0.000656908	2103.81	702.278	2103.81	702.278	3	21
1	167.84	57.1	P02760	AMBP_HUMAN	Protein AMBP OS=Homo sapiens GN=AMBP PE=1 SV=1	0	99	EDSCQLGYSAGPCMGMTSR	Carbamidomethyl(C)@4; Carbamidomethyl(C)@13; Oxidation(M)@14; Oxidation(M)@16		0.00788775	2137.83	713.616	2137.82	713.613	3	21
1	167.84	57.1	P02760	AMBP_HUMAN	Protein AMBP OS=Homo sapiens GN=AMBP PE=1 SV=1	0	99	EDSCQLGYSAGPCMGMTSR	Carbamidomethyl(C)@4; Carbamidomethyl(C)@13; Oxidation(M)@14; Oxidation(M)@16		0.00788775	2137.83	713.616	2137.82	713.613	3	22
1	167.84	57.1	P02760	AMBP_HUMAN	Protein AMBP OS=Homo sapiens GN=AMBP PE=1 SV=1	0	99	EDSCQLGYSAGPCMGMTSR	Carbamidomethyl(C)@4; Carbamidomethyl(C)@13; Oxidation(M)@14; Oxidation(M)@16		0.00788775	2137.83	713.616	2137.82	713.613	3	21
1	167.84	57.1	P02760	AMBP_HUMAN	Protein AMBP OS=Homo sapiens GN=AMBP PE=1 SV=1	0	99	EDSCQLGYSAGPCMGMTSR	Carbamidomethyl(C)@4; Pro->pyro-Glu(P)@12; Carbamidomethyl(C)@13; Oxidation(M)@14; Oxidation(M)@16		0.0392274	2151.84	718.286	2151.8	718.273	3	15
1	167.84	57.1	P02760	AMBP_HUMAN	Protein AMBP OS=Homo sapiens GN=AMBP PE=1 SV=1	0	99	EDSCQLGYSAGPCMGMTSR	Carbamidomethyl(C)@4; Carbamidomethyl(C)@13; Oxidation(M)@14; Oxidation(M)@16		0.00276083	2137.82	713.614	2137.82	713.613	3	19
1	167.84	57.1	P02760	AMBP_HUMAN	Protein AMBP OS=Homo sapiens GN=AMBP PE=1 SV=1	0	99	EDSCQLGYSAGPCMGMTSR	Carbamidomethyl(C)@4; Amino(Y)@8; Carbamidomethyl(C)@13; Oxidation(M)@14; Oxidation(M)@16		0.00679398	2152.84	718.619	2152.83	718.617	3	15
1	167.84	57.1	P02760	AMBP_HUMAN	Protein AMBP OS=Homo sapiens GN=AMBP PE=1 SV=1	0	99	EDSCQLGYSAGPCMGMTSR	Carbamidomethyl(C)@4; Carbamidomethyl(C)@13; Carbamyl(M)@14; Oxidation(M)@16		0.000685332	2164.83	722.617	2164.83	722.617	3	17
1	167.84	57.1	P02760	AMBP_HUMAN	Protein AMBP OS=Homo sapiens GN=AMBP PE=1 SV=1	0	99	EDSCQLGYSAGPCMGMTSR	Carbamidomethyl(C)@4; Carbamidomethyl(C)@13; Oxidation(M)@14; Dioxidation(M)@16		0.00293658	2153.82	718.946	2153.81	718.945	3	22
1	167.84	57.1	P02760	AMBP_HUMAN	Protein AMBP OS=Homo sapiens GN=AMBP PE=1 SV=1	0	99	EDSCQLGYSAGPCMGMTSR	Carbamidomethyl(C)@4; Carbamidomethyl(C)@13; Oxidation(M)@14		0.00459875	2121.83	708.283	2121.82	708.281	3	22
1	167.84	57.1	P02760	AMBP_HUMAN	Protein AMBP OS=Homo sapiens GN=AMBP PE=1 SV=1	0	99	EDSCQLGYSAGPCMGMTSR	Cation:Na(D)@2; Carbamidomethyl(C)@4; Carbamidomethyl(C)@13; Oxidation(M)@14		-0.00023221	2143.8	715.609	2143.8	715.609	3	16
1	167.84	57.1	P02760	AMBP_HUMAN	Protein AMBP OS=Homo sapiens GN=AMBP PE=1 SV=1	0	99	EDSCQLGYSAGPCMGMTSR	Carbamidomethyl(C)@4; Carbamidomethyl(C)@13; Oxidation(M)@14		0.00459875	2121.83	708.283	2121.82	708.281	3	24
1	167.84	57.1	P02760	AMBP_HUMAN	Protein AMBP OS=Homo sapiens GN=AMBP PE=1 SV=1	0	99	EDSCQLGYSAGPCMGMTSR	Carbamidomethyl(C)@4; Pro->pyro-Glu(P)@12; Carbamidomethyl(C)@13; Oxidation(M)@14		0.0342909	2135.84	712.953	2135.8	712.941	3	15
1	167.84	57.1	P02760	AMBP_HUMAN	Protein AMBP OS=Homo sapiens GN=AMBP PE=1 SV=1	0	99	EDSCQLGYSAGPCMGMTSR	Carbamidomethyl(C)@4; Carbamidomethyl(C)@13; Oxidation(M)@14		0.00459875	2121.83	708.283	2121.82	708.281	3	22
1	167.84	57.1	P02760	AMBP_HUMAN	Protein AMBP OS=Homo sapiens GN=AMBP PE=1 SV=1	0	99	EDSCQLGYSAGPCMGMTSR	Carbamidomethyl(C)@4; Carbamidomethyl(C)@13; Oxidation(M)@16; Cation:Na@C-term		0.00196504	2143.81	715.609	2143.8	715.609	3	15
1	167.84	57.1	P02760	AMBP_HUMAN	Protein AMBP OS=Homo sapiens GN=AMBP PE=1 SV=1	0	99	EDSCQLGYSAGPCMGMTSR	Carbamidomethyl(C)@4; Carbamidomethyl(C)@13; Oxidation(M)@16		-0.000345071	2121.82	708.281	2121.82	708.281	3	23
1	167.84	57.1	P02760	AMBP_HUMAN	Protein AMBP OS=Homo sapiens GN=AMBP PE=1 SV=1	0	99	EDSCQLGYSAGPCMGMTSR	Carbamidomethyl(C)@4; Pro->pyro-Glu(P)@12; Carbamidomethyl(C)@13; Oxidation(M)@16		0.0394178	2135.84	712.954	2135.8	712.941	3	17
1	167.84	57.1	P02760	AMBP_HUMAN	Protein AMBP OS=Homo sapiens GN=AMBP PE=1 SV=1	0	99	EDSCQLGYSAGPCMGMTSR	Carbamidomethyl(C)@4; Carbamidomethyl(C)@13; Oxidation(M)@16		0.00844394	2121.83	708.284	2121.82	708.281	3	20
1	167.84	57.1	P02760	AMBP_HUMAN	Protein AMBP OS=Homo sapiens GN=AMBP PE=1 SV=1	0	99	EDSCQLGYSAGPCMGMTSR	Glu->pyro-Glu@N-term; Carbamidomethyl(C)@4; Deamidated(Q)@5; Carbamidomethyl(C)@13; Oxidation(M)@14; Oxidation(M)@16		0.0236655	2120.81	707.945	2120.79	707.938	3	13
1	167.84	57.1	P02760	AMBP_HUMAN	Protein AMBP OS=Homo sapiens GN=AMBP PE=1 SV=1	0	99	EDSCQLGYSAGPCMGMTSR	Carbamidomethyl(C)@4; Carbamidomethyl(C)@13		0.00442204	2105.83	702.951	2105.83	702.95	3	22
1	167.84	57.1	P02760	AMBP_HUMAN	Protein AMBP OS=Homo sapiens GN=AMBP PE=1 SV=1	0	99	EDSCQLGYSAGPCMGMTSR	Cation:Na(D)@2; Carbamidomethyl(C)@4; Carbamidomethyl(C)@13		-0.00150689	2127.81	710.277	2127.81	710.277	3	17
1	167.84	57.1	P02760	AMBP_HUMAN	Protein AMBP OS=Homo sapiens GN=AMBP PE=1 SV=1	0	99	EDSCQLGYSAGPCMGMTSR	Carbamidomethyl(C)@4; Carbamidomethyl(C)@13		0.00442204	2105.83	702.951	2105.83	702.95	3	24
1	167.84	57.1	P02760	AMBP_HUMAN	Protein AMBP OS=Homo sapiens GN=AMBP PE=1 SV=1	0	99	EDSCQLGYSAGPCMGMTSR	Carbamidomethyl(C)@4; Pro->pyro-Glu(P)@12; Carbamidomethyl(C)@13		0.0416219	2119.85	707.623	2119.81	707.609	3	16
1	167.84	57.1	P02760	AMBP_HUMAN	Protein AMBP OS=Homo sapiens GN=AMBP PE=1 SV=1	0	99	EDSCQLGYSAGPCMGMTSR	Carbamidomethyl(C)@4; Carbamidomethyl(C)@13		0.000210638	2105.83	702.95	2105.83	702.95	3	21
1	167.84	57.1	P02760	AMBP_HUMAN	Protein AMBP OS=Homo sapiens GN=AMBP PE=1 SV=1	0	99	EDSCQLGYSAGPCMGMTSR	Glu->pyro-Glu@N-term; Carbamidomethyl(C)@4; Carbamidomethyl(C)@13; Oxidation(M)@14		0.00189456	2103.81	702.279	2103.81	702.278	3	20
1	167.84	57.1	P02760	AMBP_HUMAN	Protein AMBP OS=Homo sapiens GN=AMBP PE=1 SV=1	0	99	EDSCQLGYSAGPCMGMTSR	Carbamidomethyl(C)@4; Carbamidomethyl(C)@13; Oxidation(M)@14; Oxidation(M)@16		0.00603482	2137.82	713.615	2137.82	713.613	3	19
1	167.84	57.1	P02760	AMBP_HUMAN	Protein AMBP OS=Homo sapiens GN=AMBP PE=1 SV=1	0	99	EDSCQLGYSAGPCMGMTSR	Carbamidomethyl(C)@4; Carbamidomethyl(C)@13; Oxidation(M)@14; Oxidation(M)@16		-0.00174014	2137.82	713.612	2137.82	713.613	3	18
1	167.84	57.1	P02760	AMBP_HUMAN	Protein AMBP OS=Homo sapiens GN=AMBP PE=1 SV=1	0	99	EDSCQLGYSAGPCMGMTSR	Carbamidomethyl(C)@4; Carbamidomethyl(C)@13; Oxidation(M)@14; Oxidation(M)@16		0.00218733	2137.82	713.614	2137.82	713.613	3	21
1	167.84	57.1	P02760	AMBP_HUMAN	Protein AMBP OS=Homo sapiens GN=AMBP PE=1 SV=1	0	99	EDSCQLGYSAGPCMGMTSR	Carbamidomethyl(C)@4; Carbamidomethyl(C)@13; Oxidation(M)@14; Oxidation(M)@16		0.00218733	2137.82	713.614	2137.82	713.613	3	20
1	167.84	57.1	P02760	AMBP_HUMAN	Protein AMBP OS=Homo sapiens GN=AMBP PE=1 SV=1	0	99	EDSCQLGYSAGPCMGMTSR	Carbamidomethyl(C)@4; Carbamidomethyl(C)@13; Oxidation(M)@14		0.000537215	2121.82	708.282	2121.82	708.281	3	21
1	167.84	57.1	P02760	AMBP_HUMAN	Protein AMBP OS=Homo sapiens GN=AMBP PE=1 SV=1	0	99	EDSCQLGYSAGPCMGMTSR	Carbamidomethyl(C)@4; Carbamidomethyl(C)@13; Oxidation(M)@14		0.000537215	2121.82	708.282	2121.82	708.281	3	24
1	167.84	57.1	P02760	AMBP_HUMAN	Protein AMBP OS=Homo sapiens GN=AMBP PE=1 SV=1	0	99	EDSCQLGYSAGPCMGMTSR	Carbamidomethyl(C)@4; Carbamidomethyl(C)@13; Oxidation(M)@16		0.00346685	2121.83	708.283	2121.82	708.281	3	19
1	167.84	57.1	P02760	AMBP_HUMAN	Protein AMBP OS=Homo sapiens GN=AMBP PE=1 SV=1	0	99	EDSCQLGYSAGPCMGMTSR	Carbamidomethyl(C)@4; Carbamidomethyl(C)@13; Oxidation(M)@16		0.00346685	2121.83	708.283	2121.82	708.281	3	22
1	167.84	57.1	P02760	AMBP_HUMAN	Protein AMBP OS=Homo sapiens GN=AMBP PE=1 SV=1	0	99	EDSCQLGYSAGPCMGMTSR	Carbamidomethyl(C)@4; Carbamidomethyl(C)@13		0.00566104	2105.83	702.952	2105.83	702.95	3	22
1	167.84	57.1	P02760	AMBP_HUMAN	Protein AMBP OS=Homo sapiens GN=AMBP PE=1 SV=1	0	99	EDSCQLGYSAGPCMGMTSR	Carbamidomethyl(C)@4; Carbamidomethyl(C)@13		0.00566104	2105.83	702.952	2105.83	702.95	3	24
1	167.84	57.1	P02760	AMBP_HUMAN	Protein AMBP OS=Homo sapiens GN=AMBP PE=1 SV=1	0	99	EDSCQLGYSAGPCMGMTSR	Carbamidomethyl(C)@4; Oxidation(P)@12; Carbamidomethyl(C)@13; Oxidation(M)@14; Oxidation(M)@16		0.00259587	2153.81	718.946	2153.81	718.945	3	17
1	167.84	57.1	P02760	AMBP_HUMAN	Protein AMBP OS=Homo sapiens GN=AMBP PE=1 SV=1	0	99	EDSCQLGYSAGPCMGMTSR	Glu->pyro-Glu@N-term; No Carbamidomethyl(C)@4; Carbamidomethyl(C)@13; Oxidation(M)@14; Oxidation(M)@16		0.023705	2062.81	688.61	2062.79	688.602	3	19
1	167.84	57.1	P02760	AMBP_HUMAN	Protein AMBP OS=Homo sapiens GN=AMBP PE=1 SV=1	0	99	EDSCQLGYSAGPCMGMTSR	Carbamidomethyl(C)@4; Oxidation(P)@12; Carbamidomethyl(C)@13; Oxidation(M)@14; Oxidation(M)@16		0.00168035	2153.81	718.945	2153.81	718.945	3	13
1	167.84	57.1	P02760	AMBP_HUMAN	Protein AMBP OS=Homo sapiens GN=AMBP PE=1 SV=1	0	99	EDSCQLGYSAGPCMGMTSR	Arg-add@N-term; Carbamidomethyl(C)@4; Carbamidomethyl(C)@13; Oxidation(M)@14; Oxidation(M)@16		0.0151127	2293.93	765.652	2293.92	765.647	3	15
1	167.84	57.1	P02760	AMBP_HUMAN	Protein AMBP OS=Homo sapiens GN=AMBP PE=1 SV=1	0	99	EDSCQLGYSAGPCMGMTSR	Cation:Na(E)@1; Carbamidomethyl(C)@4; Carbamidomethyl(C)@13; Oxidation(M)@14; Oxidation(M)@16		0.0067304	2159.81	720.943	2159.8	720.94	3	14
1	167.84	57.1	P02760	AMBP_HUMAN	Protein AMBP OS=Homo sapiens GN=AMBP PE=1 SV=1	0	99	EDSCQLGYSAGPCMGMTSR	Carbamidomethyl(C)@4; Pro->pyro-Glu(P)@12; Carbamidomethyl(C)@13; Oxidation(M)@14		0.00487668	2135.81	712.943	2135.8	712.941	3	18
1	167.84	57.1	P02760	AMBP_HUMAN	Protein AMBP OS=Homo sapiens GN=AMBP PE=1 SV=1	0	99	EDSCQLGYSAGPCMGMTSR	Carbamidomethyl(C)@4; Carbamidomethyl(C)@13; Carbamyl(M)@14; Oxidation(M)@16		-0.00682093	2164.82	722.614	2164.83	722.617	3	16
1	167.84	57.1	P02760	AMBP_HUMAN	Protein AMBP OS=Homo sapiens GN=AMBP PE=1 SV=1	0	99	EDSCQLGYSAGPCMGMTSR	Carbamidomethyl(C)@4; Oxidation(P)@12; Carbamidomethyl(C)@13; Oxidation(M)@14; Oxidation(M)@16		0.00259587	2153.81	718.946	2153.81	718.945	3	18
1	167.84	57.1	P02760	AMBP_HUMAN	Protein AMBP OS=Homo sapiens GN=AMBP PE=1 SV=1	0	99	EDSCQLGYSAGPCMGMTSR	Carbamidomethyl(C)@4; Oxidation(P)@12; Carbamidomethyl(C)@13; Oxidation(M)@14; Oxidation(M)@16		0.00296207	2153.82	718.946	2153.81	718.945	3	15
1	167.84	57.1	P02760	AMBP_HUMAN	Protein AMBP OS=Homo sapiens GN=AMBP PE=1 SV=1	0	99	EDSCQLGYSAGPCMGMTSR	Carbamidomethyl(C)@4; Pro->pyro-Glu(P)@12; Carbamidomethyl(C)@13; Oxidation(M)@14; Oxidation(M)@16		0.0381587	2151.83	718.285	2151.8	718.273	3	17
1	167.84	57.1	P02760	AMBP_HUMAN	Protein AMBP OS=Homo sapiens GN=AMBP PE=1 SV=1	0	99	EDSCQLGYSAGPCMGMTSR	Carbamidomethyl(C)@4; Carbamidomethyl(C)@13; Oxidation(M)@16; Dehydrated(T)@17; Arg->GluSA(R)@19		0.0144711	2060.77	687.932	2060.76	687.927	3	15
1	167.84	57.1	P02760	AMBP_HUMAN	Protein AMBP OS=Homo sapiens GN=AMBP PE=1 SV=1	0	99	EDSCQLGYSAGPCMGMTSR	Carbamidomethyl(C)@4; Carbamidomethyl(C)@13; Oxidation(M)@16; Dehydrated(T)@17; Arg->GluSA(R)@19		0.0144711	2060.77	687.932	2060.76	687.927	3	15
1	167.84	57.1	P02760	AMBP_HUMAN	Protein AMBP OS=Homo sapiens GN=AMBP PE=1 SV=1	0	99	EDSCQLGYSAGPCMGMTSR	Glu->pyro-Glu@N-term; No Carbamidomethyl(C)@4; Carbamidomethyl(C)@13; Oxidation(M)@14		0.0182524	2046.81	683.277	2046.79	683.271	3	14
1	167.84	57.1	P02760	AMBP_HUMAN	Protein AMBP OS=Homo sapiens GN=AMBP PE=1 SV=1	0	99	EDSCQLGYSAGPCMGMTSR	Delta:H(2)C(2)@N-term; Carbamidomethyl(C)@4; Carbamidomethyl(C)@13; Oxidation(M)@14; Oxidation(M)@16		0.00296205	2163.84	722.286	2163.83	722.285	3	17
1	167.84	57.1	P02760	AMBP_HUMAN	Protein AMBP OS=Homo sapiens GN=AMBP PE=1 SV=1	0	99	EDSCQLGYSAGPCMGMTSR	Propionamide@N-term; Carbamidomethyl(C)@4; Carbamidomethyl(C)@13		0.0520977	2176.92	726.646	2176.86	726.629	3	13
1	167.84	57.1	P02760	AMBP_HUMAN	Protein AMBP OS=Homo sapiens GN=AMBP PE=1 SV=1	0	99	EDSCQLGYSAGPCMGMTSR	Carbamidomethyl(C)@4; Pro->pyro-Glu(P)@12; Carbamidomethyl(C)@13; Oxidation(M)@14; Oxidation(M)@16		0.033398	2151.83	718.284	2151.8	718.273	3	14
1	167.84	57.1	P02760	AMBP_HUMAN	Protein AMBP OS=Homo sapiens GN=AMBP PE=1 SV=1	0	99	EDSCQLGYSAGPCMGMTSR	Glu->pyro-Glu@N-term; Carbamidomethyl(C)@4; Deamidated(Q)@5; Amino(Y)@8; Carbamidomethyl(C)@13; Oxidation(M)@14		-0.00203877	2119.8	707.609	2119.81	707.609	3	14
1	167.84	57.1	P02760	AMBP_HUMAN	Protein AMBP OS=Homo sapiens GN=AMBP PE=1 SV=1	0	99	EDSCQLGYSAGPCMGMTSR	Carbamidomethyl(C)@4; Carbamidomethyl(C)@13; Oxidation(M)@16; Cation:Na@C-term		-0.000184423	2143.8	715.609	2143.8	715.609	3	18
1	167.84	57.1	P02760	AMBP_HUMAN	Protein AMBP OS=Homo sapiens GN=AMBP PE=1 SV=1	0	99	EDSCQLGYSAGPCMGMTSR	Carbamidomethyl(C)@4; Pro->pyro-Glu(P)@12; Carbamidomethyl(C)@13; Oxidation(M)@14		0.0387509	2135.84	712.954	2135.8	712.941	3	17
1	167.84	57.1	P02760	AMBP_HUMAN	Protein AMBP OS=Homo sapiens GN=AMBP PE=1 SV=1	0	99	EDSCQLGYSAGPCMGMTSR	Carbamidomethyl(C)@4; Pro->pyro-Glu(P)@12; Carbamidomethyl(C)@13; Oxidation(M)@14		0.0387509	2135.84	712.954	2135.8	712.941	3	14
1	167.84	57.1	P02760	AMBP_HUMAN	Protein AMBP OS=Homo sapiens GN=AMBP PE=1 SV=1	0	99	EDSCQLGYSAGPCMGMTSR	Cation:Na(E)@1; Carbamidomethyl(C)@4; Carbamidomethyl(C)@13; Oxidation(M)@16		0.000731097	2143.8	715.609	2143.8	715.609	3	14
1	167.84	57.1	P02760	AMBP_HUMAN	Protein AMBP OS=Homo sapiens GN=AMBP PE=1 SV=1	0	99	EDSCQLGYSAGPCMGMTSR	Carbamidomethyl(C)@4; Carbamidomethyl(C)@13; Oxidation(M)@16; Cation:Na@C-term		0.000731097	2143.8	715.609	2143.8	715.609	3	18
1	167.84	57.1	P02760	AMBP_HUMAN	Protein AMBP OS=Homo sapiens GN=AMBP PE=1 SV=1	0	99	EDSCQLGYSAGPCMGMTSR	Carbamidomethyl(C)@4; Pro->pyro-Glu(P)@12; Carbamidomethyl(C)@13; Oxidation(M)@16		0.0429623	2135.84	712.956	2135.8	712.941	3	15
1	167.84	57.1	P02760	AMBP_HUMAN	Protein AMBP OS=Homo sapiens GN=AMBP PE=1 SV=1	0	99	EDSCQLGYSAGPCMGMTSR	Carbamidomethyl(C)@4; Amino(Y)@8; Carbamidomethyl(C)@13; Oxidation(M)@14		0.0229778	2136.86	713.293	2136.83	713.285	3	18
1	167.84	57.1	P02760	AMBP_HUMAN	Protein AMBP OS=Homo sapiens GN=AMBP PE=1 SV=1	0	99	EDSCQLGYSAGPCMGMTSR	Glu->pyro-Glu@N-term; Cation:Na(D)@2; Carbamidomethyl(C)@4; Carbamidomethyl(C)@13; Oxidation(M)@14; Oxidation(M)@16		0.00754656	2141.8	714.939	2141.79	714.937	3	15
1	167.84	57.1	P02760	AMBP_HUMAN	Protein AMBP OS=Homo sapiens GN=AMBP PE=1 SV=1	0	99	EDSCQLGYSAGPCMGMTSR	Carbamidomethyl(C)@4; Carbamidomethyl(C)@13; Carbamyl(M)@16		0.0140962	2148.85	717.29	2148.83	717.285	3	14
1	167.84	57.1	P02760	AMBP_HUMAN	Protein AMBP OS=Homo sapiens GN=AMBP PE=1 SV=1	0	99	EDSCQLGYSAGPCMGMTSR	Glu->pyro-Glu@N-term; Carbamidomethyl(C)@4; Carbamidomethyl(C)@13; Oxidation(M)@14; Oxidation(M)@16		-0.000279103	2119.81	1060.91	2119.81	1060.91	2	15
1	167.84	57.1	P02760	AMBP_HUMAN	Protein AMBP OS=Homo sapiens GN=AMBP PE=1 SV=1	0	99	EDSCQLGYSAGPCMGMTSR	Glu->pyro-Glu@N-term; Carbamidomethyl(C)@4; No Carbamidomethyl(C)@13		0.0188418	2030.81	677.945	2030.8	677.939	3	14
1	167.84	57.1	P02760	AMBP_HUMAN	Protein AMBP OS=Homo sapiens GN=AMBP PE=1 SV=1	0	99	EDSCQLGYSAGPCMGMTSR	Delta:H(4)C(2)@N-term; Carbamidomethyl(C)@4; Deamidated(Q)@5; Carbamidomethyl(C)@13; Oxidation(M)@14; Oxidation(M)@16		-0.000938234	2166.83	723.284	2166.83	723.285	3	16
1	167.84	57.1	P02760	AMBP_HUMAN	Protein AMBP OS=Homo sapiens GN=AMBP PE=1 SV=1	0	99	EDSCQLGYSAGPCMGMTSR	Glu->pyro-Glu@N-term; Carbamidomethyl(C)@4; Carbamidomethyl(C)@13; Oxidation(M)@14; Dioxidation(M)@16		0.0217223	2135.82	712.948	2135.8	712.941	3	13
1	167.84	57.1	P02760	AMBP_HUMAN	Protein AMBP OS=Homo sapiens GN=AMBP PE=1 SV=1	0	99	EDSCQLGYSAGPCMGMTSR	Delta:H(2)C(2)@N-term; Carbamidomethyl(C)@4; Carbamidomethyl(C)@13; Oxidation(M)@14		0.000441831	2147.84	716.953	2147.84	716.953	3	18
1	167.84	57.1	P02760	AMBP_HUMAN	Protein AMBP OS=Homo sapiens GN=AMBP PE=1 SV=1	0	99	EDSCQLGYSAGPCMGMTSR	Carbamidomethyl(C)@4; Carbamidomethyl(C)@13; Dehydrated(T)@17; Arg->GluSA(R)@19		0.0192723	2044.78	682.601	2044.76	682.595	3	16
1	167.84	57.1	P02760	AMBP_HUMAN	Protein AMBP OS=Homo sapiens GN=AMBP PE=1 SV=1	0	99	EDSCQLGYSAGPCMGMTSR	Carbamidomethyl(C)@4; Carbamidomethyl(C)@13; Oxidation(M)@16; Dehydrated(T)@17		0.00844025	2103.82	702.281	2103.81	702.278	3	15
1	167.84	57.1	P02760	AMBP_HUMAN	Protein AMBP OS=Homo sapiens GN=AMBP PE=1 SV=1	0	99	EDSCQLGYSAGPCMGMTSR	Carbamidomethyl(C)@4; Carbamidomethyl(C)@13		-1.00673	2104.82	702.614	2105.83	702.95	3	13
1	167.84	57.1	P02760	AMBP_HUMAN	Protein AMBP OS=Homo sapiens GN=AMBP PE=1 SV=1	0	99	EDSCQLGYSAGPCMGMTSR	Carbamidomethyl(C)@4; Carbamidomethyl(C)@13		-2.00721	2103.82	702.281	2105.83	702.95	3	17
1	167.84	57.1	P02760	AMBP_HUMAN	Protein AMBP OS=Homo sapiens GN=AMBP PE=1 SV=1	0	99	EDSCQLGYSAGPCMGMTSR	Cation:Na(D)@2; Carbamidomethyl(C)@4; Carbamidomethyl(C)@13		0.00242175	2127.81	710.278	2127.81	710.277	3	14
1	167.84	57.1	P02760	AMBP_HUMAN	Protein AMBP OS=Homo sapiens GN=AMBP PE=1 SV=1	0	99	EDSCQLGYSAGPCMGMTSR	Cation:Na(E)@1; Carbamidomethyl(C)@4; Carbamidomethyl(C)@13		0.00242175	2127.81	710.278	2127.81	710.277	3	16
1	167.84	57.1	P02760	AMBP_HUMAN	Protein AMBP OS=Homo sapiens GN=AMBP PE=1 SV=1	0	99	EDSCQLGYSAGPCMGMTSR	Glu->pyro-Glu@N-term; Carbamidomethyl(C)@4; Oxidation(P)@12; Carbamidomethyl(C)@13; Oxidation(M)@14		0.0417231	2119.85	707.623	2119.81	707.609	3	15
1	167.84	57.1	P02760	AMBP_HUMAN	Protein AMBP OS=Homo sapiens GN=AMBP PE=1 SV=1	0	99	EDSCQLGYSAGPCMGMTSR	Carbamidomethyl(C)@4; Carbamidomethyl(C)@13		-9.03181	2096.8	699.939	2105.83	702.95	3	14
1	167.84	57.1	P02760	AMBP_HUMAN	Protein AMBP OS=Homo sapiens GN=AMBP PE=1 SV=1	0	99	EDSCQLGYSAGPCMGMTSR	Carbamidomethyl(C)@4; Carbamidomethyl(C)@13; Oxidation(M)@16; Carbamidomethyl(T)@17		0.000547314	2178.84	727.289	2178.84	727.289	3	12
1	167.84	57.1	P02760	AMBP_HUMAN	Protein AMBP OS=Homo sapiens GN=AMBP PE=1 SV=1	0	99	EDSCQLGYSAGPCMGMTSR	Carbamidomethyl(C)@4; Carbamidomethyl(C)@13; Arg->GluSA(R)@19		0.0341412	2062.81	688.61	2062.77	688.599	3	12
1	167.84	57.1	P02760	AMBP_HUMAN	Protein AMBP OS=Homo sapiens GN=AMBP PE=1 SV=1	0	99	EDSCQLGYSAGPCMGMTSR	Carbamidomethyl(C)@4; Carbamidomethyl(C)@13; Oxidation(M)@14; Dioxidation(M)@16		0.00121652	2153.81	718.945	2153.81	718.945	3	11
1	167.84	57.1	P02760	AMBP_HUMAN	Protein AMBP OS=Homo sapiens GN=AMBP PE=1 SV=1	0	99	EDSCQLGYSAGPCMGMTSR	Glu->pyro-Glu@N-term; No Carbamidomethyl(C)@4; Carbamidomethyl(C)@13; Oxidation(M)@16		0.0194111	2046.81	683.277	2046.79	683.271	3	13
1	167.84	57.1	P02760	AMBP_HUMAN	Protein AMBP OS=Homo sapiens GN=AMBP PE=1 SV=1	0	99	EDSCQLGYSAGPCMGMTSR	Glu->pyro-Glu@N-term; Carbamidomethyl(C)@4; Deamidated(Q)@5; Carbamidomethyl(C)@13; Oxidation(M)@14; Oxidation(M)@16		0.0171987	2120.81	1061.41	2120.79	1061.4	2	11
1	167.84	57.1	P02760	AMBP_HUMAN	Protein AMBP OS=Homo sapiens GN=AMBP PE=1 SV=1	0	99	EDSCQLGYSAGPCMGMTSR	Carbamidomethyl(C)@4; Carbamidomethyl(C)@13; Oxidation(M)@14; Oxidation(M)@16; Amidated@C-term		-0.00702837	2136.83	713.283	2136.83	713.285	3	12
1	167.84	57.1	P02760	AMBP_HUMAN	Protein AMBP OS=Homo sapiens GN=AMBP PE=1 SV=1	0	99	EDSCQLGYSAGPCMGMTSR	Carbamidomethyl(C)@4; Pro->pyro-Glu(P)@12; Carbamidomethyl(C)@13; Oxidation(M)@14; Oxidation(M)@16		0.0312993	2151.83	718.283	2151.8	718.273	3	15
1	167.84	57.1	P02760	AMBP_HUMAN	Protein AMBP OS=Homo sapiens GN=AMBP PE=1 SV=1	0	99	EDSCQLGYSAGPCMGMTSR	Cation:Na(D)@2; Carbamidomethyl(C)@4; Carbamidomethyl(C)@13; Oxidation(M)@14		-0.00232316	2143.8	715.608	2143.8	715.609	3	15
1	167.84	57.1	P02760	AMBP_HUMAN	Protein AMBP OS=Homo sapiens GN=AMBP PE=1 SV=1	0	99	EDSCQLGYSAGPCMGMTSR	Carbamidomethyl(C)@4; Carbamidomethyl(C)@13; Oxidation(M)@14; Oxidation(M)@16; Cation:Na@C-term		-0.00148931	2159.8	720.94	2159.8	720.94	3	16
1	167.84	57.1	P02760	AMBP_HUMAN	Protein AMBP OS=Homo sapiens GN=AMBP PE=1 SV=1	0	99	EDSCQLGYSAGPCMGMTSR	Carbamidomethyl(C)@4; Carbamidomethyl(C)@13; Oxidation(M)@16		0.000590932	2121.82	708.282	2121.82	708.281	3	18
1	167.84	57.1	P02760	AMBP_HUMAN	Protein AMBP OS=Homo sapiens GN=AMBP PE=1 SV=1	0	99	EDSCQLGYSAGPCMGMTSR	Cation:Na(D)@2; Carbamidomethyl(C)@4; Carbamidomethyl(C)@13		-0.00111841	2127.81	710.277	2127.81	710.277	3	15
1	167.84	57.1	P02760	AMBP_HUMAN	Protein AMBP OS=Homo sapiens GN=AMBP PE=1 SV=1	0	99	EDSCQLGYSAGPCMGMTSR	Carbamidomethyl(C)@4; Pro->pyro-Glu(P)@12; Carbamidomethyl(C)@13		0.0377966	2119.84	707.622	2119.81	707.609	3	15
1	167.84	57.1	P02760	AMBP_HUMAN	Protein AMBP OS=Homo sapiens GN=AMBP PE=1 SV=1	0	99	EDSCQLGYSAGPCMGMTSR	Carbamidomethyl(C)@4; Deamidated(Q)@5; Carbamidomethyl(C)@13; Oxidation(M)@14; Oxidation(M)@16		0.0190241	2138.82	713.947	2138.8	713.941	3	15
1	167.84	57.1	P02760	AMBP_HUMAN	Protein AMBP OS=Homo sapiens GN=AMBP PE=1 SV=1	0	99	EDSCQLGYSAGPCMGMTSR	Carbamidomethyl(C)@4; Pro->pyro-Glu(P)@12; Carbamidomethyl(C)@13; Oxidation(M)@14; Oxidation(M)@16		0.0330034	2151.83	718.284	2151.8	718.273	3	13
1	167.84	57.1	P02760	AMBP_HUMAN	Protein AMBP OS=Homo sapiens GN=AMBP PE=1 SV=1	0	99	EDSCQLGYSAGPCMGMTSR	Carbamidomethyl(C)@4; Carbamidomethyl(S)@9; Carbamidomethyl(C)@13		0.00992904	2162.86	721.96	2162.85	721.957	3	12
1	167.84	57.1	P02760	AMBP_HUMAN	Protein AMBP OS=Homo sapiens GN=AMBP PE=1 SV=1	0	99	EDSCQLGYSAGPCMGMTSR	Cation:Na(D)@2; Carbamidomethyl(C)@4; Carbamidomethyl(C)@13; Oxidation(M)@14		0.000133999	2143.8	715.609	2143.8	715.609	3	13
1	167.84	57.1	P02760	AMBP_HUMAN	Protein AMBP OS=Homo sapiens GN=AMBP PE=1 SV=1	0	99	EDSCQLGYSAGPCMGMTSR	Cation:Na(E)@1; Carbamidomethyl(C)@4; Carbamidomethyl(C)@13; Oxidation(M)@14; Oxidation(M)@16		0.0067304	2159.81	720.943	2159.8	720.94	3	12
1	167.84	57.1	P02760	AMBP_HUMAN	Protein AMBP OS=Homo sapiens GN=AMBP PE=1 SV=1	0	99	EDSCQLGYSAGPCMGMTSR	Carbamidomethyl(C)@4; Pro->pyro-Glu(P)@12; Carbamidomethyl(C)@13; Oxidation(M)@14; Oxidation(M)@16		0.0385249	2151.83	718.286	2151.8	718.273	3	13
1	167.84	57.1	P02760	AMBP_HUMAN	Protein AMBP OS=Homo sapiens GN=AMBP PE=1 SV=1	0	99	EDSCQLGYSAGPCMGMTSR	Carbamidomethyl(C)@4; Carbamidomethyl(C)@13; Oxidation(M)@14; Oxidation(M)@16		0.0106633	2137.83	535.464	2137.82	535.462	4	14
1	167.84	57.1	P02760	AMBP_HUMAN	Protein AMBP OS=Homo sapiens GN=AMBP PE=1 SV=1	0	99	EDSCQLGYSAGPCMGMTSR	Carbamidomethyl(C)@4; Pro->pyro-Glu(P)@12; Carbamidomethyl(C)@13; Oxidation(M)@14; Oxidation(M)@16		0.0385249	2151.83	718.286	2151.8	718.273	3	13
1	167.84	57.1	P02760	AMBP_HUMAN	Protein AMBP OS=Homo sapiens GN=AMBP PE=1 SV=1	0	99	EDSCQLGYSAGPCMGMTSR	Glu->pyro-Glu@N-term; Carbamidomethyl(C)@4; Oxidation(P)@12; Carbamidomethyl(C)@13; Oxidation(M)@14; Dioxidation(M)@16		0.0332149	2151.83	718.284	2151.8	718.273	3	13
1	167.84	57.1	P02760	AMBP_HUMAN	Protein AMBP OS=Homo sapiens GN=AMBP PE=1 SV=1	0	99	EDSCQLGYSAGPCMGMTSR	Carbamidomethyl(C)@4; Carbamidomethyl(C)@13; Arg->GluSA(R)@19		0.0250508	2062.8	688.607	2062.77	688.599	3	12
1	167.84	57.1	P02760	AMBP_HUMAN	Protein AMBP OS=Homo sapiens GN=AMBP PE=1 SV=1	0	99	EDSCQLGYSAGPCMGMTSR	Glu->pyro-Glu@N-term; Carbamidomethyl(C)@4; Oxidation(P)@12; Carbamidomethyl(C)@13; Oxidation(M)@14		0.0305538	2119.84	707.62	2119.81	707.609	3	12
1	167.84	57.1	P02760	AMBP_HUMAN	Protein AMBP OS=Homo sapiens GN=AMBP PE=1 SV=1	0	99	EDSCQLGYSAGPCMGMTSR	Carbamidomethyl(C)@4; Carbamidomethyl(C)@13; Oxidation(M)@14; Oxidation(M)@16		0.00577822	2137.82	713.615	2137.82	713.613	3	14
1	167.84	57.1	P02760	AMBP_HUMAN	Protein AMBP OS=Homo sapiens GN=AMBP PE=1 SV=1	0	99	EDSCQLGYSAGPCMGMTSR	Carbamidomethyl(C)@4; Carbamidomethyl(S)@9; Carbamidomethyl(C)@13; Oxidation(M)@16		-0.00265933	2178.84	727.288	2178.84	727.289	3	12
1	167.84	57.1	P02760	AMBP_HUMAN	Protein AMBP OS=Homo sapiens GN=AMBP PE=1 SV=1	0	99	EDSCQLGYSAGPCMGMTSR	Glu->pyro-Glu@N-term; No Carbamidomethyl(C)@4; Carbamidomethyl(C)@13; Oxidation(M)@14; Oxidation(M)@16		0.0145632	2062.8	688.607	2062.79	688.602	3	15
1	167.84	57.1	P02760	AMBP_HUMAN	Protein AMBP OS=Homo sapiens GN=AMBP PE=1 SV=1	0	99	EDSCQLGYSAGPCMGMTSR	Cation:Na(D)@2; Carbamidomethyl(C)@4; Carbamidomethyl(C)@13; Oxidation(M)@14; Oxidation(M)@16		0.000394111	2159.8	720.941	2159.8	720.94	3	12
1	167.84	57.1	P02760	AMBP_HUMAN	Protein AMBP OS=Homo sapiens GN=AMBP PE=1 SV=1	0	99	EDSCQLGYSAGPCMGMTSR	Cation:Na(E)@1; Carbamidomethyl(C)@4; Carbamidomethyl(C)@13; Oxidation(M)@14; Oxidation(M)@16		0.000394111	2159.8	720.941	2159.8	720.94	3	13
1	167.84	57.1	P02760	AMBP_HUMAN	Protein AMBP OS=Homo sapiens GN=AMBP PE=1 SV=1	0	99	EDSCQLGYSAGPCMGMTSR	Carbamidomethyl(C)@4; Pro->pyro-Glu(P)@12; Carbamidomethyl(C)@13; Oxidation(M)@14; Oxidation(M)@16		0.0336486	2151.83	718.284	2151.8	718.273	3	12
1	167.84	57.1	P02760	AMBP_HUMAN	Protein AMBP OS=Homo sapiens GN=AMBP PE=1 SV=1	0	99	EDSCQLGYSAGPCMGMTSR	Carbamidomethyl(C)@4; Pro->pyro-Glu(P)@12; Carbamidomethyl(C)@13; Oxidation(M)@16		0.00475125	2135.81	712.943	2135.8	712.941	3	18
1	167.84	57.1	P02760	AMBP_HUMAN	Protein AMBP OS=Homo sapiens GN=AMBP PE=1 SV=1	0	99	EDSCQLGYSAGPCMGMTSR	Carbamidomethyl(C)@4; Carbamidomethyl(C)@13; Oxidation(M)@14; Carbamyl(M)@16		0.0102832	2164.84	722.62	2164.83	722.617	3	20
1	167.84	57.1	P02760	AMBP_HUMAN	Protein AMBP OS=Homo sapiens GN=AMBP PE=1 SV=1	0	99	EDSCQLGYSAGPCMGMTSR	Carbamidomethyl(C)@4; Carbamidomethyl(C)@13; Oxidation(M)@14; Dioxidation(M)@16		0.00339697	2153.82	718.946	2153.81	718.945	3	22
1	167.84	57.1	P02760	AMBP_HUMAN	Protein AMBP OS=Homo sapiens GN=AMBP PE=1 SV=1	0	99	EDSCQLGYSAGPCMGMTSR	Carbamidomethyl(C)@4; Carbamidomethyl(C)@13; Carbamyl(M)@14; Oxidation(M)@16		0.0102832	2164.84	722.62	2164.83	722.617	3	18
1	167.84	57.1	P02760	AMBP_HUMAN	Protein AMBP OS=Homo sapiens GN=AMBP PE=1 SV=1	0	99	EDSCQLGYSAGPCMGMTSR	Carbamidomethyl(C)@4; Carbamidomethyl(C)@13; Oxidation(M)@14; Dioxidation(M)@16		0.00339697	2153.82	718.946	2153.81	718.945	3	20
1	167.84	57.1	P02760	AMBP_HUMAN	Protein AMBP OS=Homo sapiens GN=AMBP PE=1 SV=1	0	99	EDSCQLGYSAGPCMGMTSR	Carbamidomethyl(C)@4; Carbamidomethyl(C)@13; Oxidation(M)@16; Dehydrated(T)@17; Arg->GluSA(R)@19		0.0188778	2060.78	687.933	2060.76	687.927	3	15
1	167.84	57.1	P02760	AMBP_HUMAN	Protein AMBP OS=Homo sapiens GN=AMBP PE=1 SV=1	0	99	EDSCQLGYSAGPCMGMTSR	Carbamidomethyl(C)@4; Carbamidomethyl(C)@13; Oxidation(M)@16; Cation:Na@C-term		-0.00506568	2143.8	715.607	2143.8	715.609	3	14
1	167.84	57.1	P02760	AMBP_HUMAN	Protein AMBP OS=Homo sapiens GN=AMBP PE=1 SV=1	0	99	EDSCQLGYSAGPCMGMTSR	Cation:Na(E)@1; Carbamidomethyl(C)@4; Carbamidomethyl(C)@13; Oxidation(M)@14		-0.00506568	2143.8	715.607	2143.8	715.609	3	14
1	167.84	57.1	P02760	AMBP_HUMAN	Protein AMBP OS=Homo sapiens GN=AMBP PE=1 SV=1	0	99	EDSCQLGYSAGPCMGMTSR	Carbamidomethyl(C)@4; Pro->pyro-Glu(P)@12; Carbamidomethyl(C)@13; Oxidation(M)@14		0.0393579	2135.84	712.954	2135.8	712.941	3	17
1	167.84	57.1	P02760	AMBP_HUMAN	Protein AMBP OS=Homo sapiens GN=AMBP PE=1 SV=1	0	99	EDSCQLGYSAGPCMGMTSR	Cation:Na(D)@2; Carbamidomethyl(C)@4; Carbamidomethyl(C)@13; Oxidation(M)@16		-0.00524878	2143.8	715.607	2143.8	715.609	3	14
1	167.84	57.1	P02760	AMBP_HUMAN	Protein AMBP OS=Homo sapiens GN=AMBP PE=1 SV=1	0	99	EDSCQLGYSAGPCMGMTSR	Glu->pyro-Glu@N-term; Carbamidomethyl(C)@4; No Carbamidomethyl(C)@13		0.0219488	2030.82	677.946	2030.8	677.939	3	13
1	167.84	57.1	P02760	AMBP_HUMAN	Protein AMBP OS=Homo sapiens GN=AMBP PE=1 SV=1	0	99	EDSCQLGYSAGPCMGMTSR	Cation:Na(E)@1; Carbamidomethyl(C)@4; Carbamidomethyl(C)@13; Oxidation(M)@16		-0.00524878	2143.8	715.607	2143.8	715.609	3	14
1	167.84	57.1	P02760	AMBP_HUMAN	Protein AMBP OS=Homo sapiens GN=AMBP PE=1 SV=1	0	99	EDSCQLGYSAGPCMGMTSR	Carbamidomethyl(C)@4; Oxidation(P)@12; No Carbamidomethyl(C)@13; Oxidation(M)@14; Dioxidation(M)@16		0.00380867	2112.79	705.27	2112.79	705.269	3	15
1	167.84	57.1	P02760	AMBP_HUMAN	Protein AMBP OS=Homo sapiens GN=AMBP PE=1 SV=1	0	99	EDSCQLGYSAGPCMGMTSR	Carbamidomethyl(C)@4; Carbamidomethyl(C)@13		-2.01578	2103.81	702.278	2105.83	702.95	3	18
1	167.84	57.1	P02760	AMBP_HUMAN	Protein AMBP OS=Homo sapiens GN=AMBP PE=1 SV=1	0	99	EDSCQLGYSAGPCMGMTSR	Cation:Na(D)@2; Carbamidomethyl(C)@4; Carbamidomethyl(C)@13		0.00265764	2127.81	710.278	2127.81	710.277	3	16
1	167.84	57.1	P02760	AMBP_HUMAN	Protein AMBP OS=Homo sapiens GN=AMBP PE=1 SV=1	0	99	EDSCQLGYSAGPCMGMTSR	Cation:Na(E)@1; Carbamidomethyl(C)@4; Carbamidomethyl(C)@13		0.00265764	2127.81	710.278	2127.81	710.277	3	14
1	167.84	57.1	P02760	AMBP_HUMAN	Protein AMBP OS=Homo sapiens GN=AMBP PE=1 SV=1	0	99	EDSCQLGYSAGPCMGMTSR	Glu->pyro-Glu@N-term; Carbamidomethyl(C)@4; Oxidation(P)@12; Carbamidomethyl(C)@13; Oxidation(M)@14		0.036461	2119.84	707.622	2119.81	707.609	3	13
1	167.84	57.1	P02760	AMBP_HUMAN	Protein AMBP OS=Homo sapiens GN=AMBP PE=1 SV=1	0	99	EDSCQLGYSAGPCMGMTSR	Cation:Na(E)@1; Carbamidomethyl(C)@4; Carbamidomethyl(C)@13; Oxidation(M)@14; Oxidation(M)@16		-0.00183567	2159.8	720.94	2159.8	720.94	3	13
1	167.84	57.1	P02760	AMBP_HUMAN	Protein AMBP OS=Homo sapiens GN=AMBP PE=1 SV=1	0	99	EDSCQLGYSAGPCMGMTSR	Carbamidomethyl(C)@4; Carbamidomethyl(C)@13; Oxidation(M)@16		0.00687313	2121.83	708.284	2121.82	708.281	3	18
1	167.84	57.1	P02760	AMBP_HUMAN	Protein AMBP OS=Homo sapiens GN=AMBP PE=1 SV=1	0	99	EDSCQLGYSAGPCMGMTSR	Carbamidomethyl(C)@4; Carbamidomethyl(C)@13; Oxidation(M)@16		0.0110845	2121.83	708.285	2121.82	708.281	3	18
1	167.84	57.1	P02760	AMBP_HUMAN	Protein AMBP OS=Homo sapiens GN=AMBP PE=1 SV=1	0	99	EDSCQLGYSAGPCMGMTSR	Cation:Na(D)@2; Carbamidomethyl(C)@4; Carbamidomethyl(C)@13		-0.00163026	2127.81	710.277	2127.81	710.277	3	17
1	167.84	57.1	P02760	AMBP_HUMAN	Protein AMBP OS=Homo sapiens GN=AMBP PE=1 SV=1	0	99	EDSCQLGYSAGPCMGMTSR	Carbamidomethyl(C)@4; Carbamidomethyl(S)@9; Carbamidomethyl(C)@13		-0.000977601	2162.85	721.957	2162.85	721.957	3	11
1	167.84	57.1	P02760	AMBP_HUMAN	Protein AMBP OS=Homo sapiens GN=AMBP PE=1 SV=1	0	99	EDSCQLGYSAGPCMGMTSR	Carbamidomethyl(C)@4; Carbamidomethyl(C)@13; Oxidation(M)@14; Oxidation(M)@16		0.00406786	2137.82	713.614	2137.82	713.613	3	17
1	167.84	57.1	P02760	AMBP_HUMAN	Protein AMBP OS=Homo sapiens GN=AMBP PE=1 SV=1	0	99	EDSCQLGYSAGPCMGMTSR	Carbamidomethyl(C)@4; Carbamidomethyl(C)@13; Oxidation(M)@14; Oxidation(M)@16		0.00278612	2137.82	713.614	2137.82	713.613	3	17
1	167.84	57.1	P02760	AMBP_HUMAN	Protein AMBP OS=Homo sapiens GN=AMBP PE=1 SV=1	0	99	EDSCQLGYSAGPCMGMTSR	Cation:Na(E)@1; Carbamidomethyl(C)@4; Carbamidomethyl(C)@13; Oxidation(M)@14		0.0025415	2143.81	715.61	2143.8	715.609	3	14
1	167.84	57.1	P02760	AMBP_HUMAN	Protein AMBP OS=Homo sapiens GN=AMBP PE=1 SV=1	0	99	EDSCQLGYSAGPCMGMTSR	Carbamidomethyl(C)@4; Amino(Y)@8; Carbamidomethyl(C)@13; Oxidation(M)@16		0.00716868	2136.84	713.287	2136.83	713.285	3	12
1	167.84	57.1	P02760	AMBP_HUMAN	Protein AMBP OS=Homo sapiens GN=AMBP PE=1 SV=1	0	99	EDSCQLGYSAGPCMGMTSR	Cation:Na(E)@1; Carbamidomethyl(C)@4; Carbamidomethyl(C)@13; Oxidation(M)@14		0.00035637	2143.8	715.609	2143.8	715.609	3	16
1	167.84	57.1	P02760	AMBP_HUMAN	Protein AMBP OS=Homo sapiens GN=AMBP PE=1 SV=1	0	99	EDSCQLGYSAGPCMGMTSR	Carbamidomethyl(C)@4; Carbamidomethyl(C)@13; Oxidation(M)@16; Dehydrated(T)@17		0.00482226	2103.82	702.279	2103.81	702.278	3	16
1	167.84	57.1	P02760	AMBP_HUMAN	Protein AMBP OS=Homo sapiens GN=AMBP PE=1 SV=1	0	99	EDSCQLGYSAGPCMGMTSR	Cation:Na(E)@1; Carbamidomethyl(C)@4; Carbamidomethyl(C)@13		-0.00163026	2127.81	710.277	2127.81	710.277	3	16
1	167.84	57.1	P02760	AMBP_HUMAN	Protein AMBP OS=Homo sapiens GN=AMBP PE=1 SV=1	0	99	EDSCQLGYSAGPCMGMTSR	Carbamidomethyl(C)@4; Carbamidomethyl(S)@9; Carbamidomethyl(C)@13		-0.0055865	2162.84	721.955	2162.85	721.957	3	12
1	167.84	57.1	P02760	AMBP_HUMAN	Protein AMBP OS=Homo sapiens GN=AMBP PE=1 SV=1	0	99	EDSCQLGYSAGPCMGMTSR	Carbamidomethyl(C)@4; Deamidated(Q)@5; Carbamidomethyl(C)@13; Oxidation(M)@14; Oxidation(M)@16		0.0192869	2138.82	713.947	2138.8	713.941	3	14
1	167.84	57.1	P02760	AMBP_HUMAN	Protein AMBP OS=Homo sapiens GN=AMBP PE=1 SV=1	0	99	EDSCQLGYSAGPCMGMTSR	Carbamidomethyl(C)@4; Carbamidomethyl(C)@13; Oxidation(M)@14		0.000556821	2121.82	531.463	2121.82	531.463	4	12
1	167.84	57.1	P02760	AMBP_HUMAN	Protein AMBP OS=Homo sapiens GN=AMBP PE=1 SV=1	0	99	EDSCQLGYSAGPCMGMTSR	Carbamidomethyl(C)@4; Deamidated(Q)@5; Carbamidomethyl(C)@13; Oxidation(M)@14		0.011456	2122.82	708.613	2122.81	708.609	3	14
[truncated: 2,544 more rows]

## Sheet: T2DM
N	Total	%Cov(95)	Accessions	Entry	Names	Contrib	Conf	Sequence	Modifications	Cleavages	dMass	Prec MW	Prec m/z	Theor MW	Theor m/z	Theor z	Sc
[truncated: 1,933 more rows]
